# Supplementary material
Source: publisher figshare collection journal article supplement (https://acs.figshare.com/ndownloader/files/24172550)
Supplement: Supplementary file 1 [file 24172550]

## Sheet: Sheet1
					Supporting information
					Comprehensive Proteomic Analysis of Lysine Ubiquitination in Seedling Leaves of Nicotiana tabacum
					Huaixu Zhan1, 2 & Liyun Song1&Ali Kamran1, Fei Han3, Bin Li4, Zhicheng Zhou5, Tianbo Liu5, Lili Shen1, Ying Li1, Fenglong Wang1* & Jinguang Yang1*
					1Key Laboratory of Tobacco Pest Monitoring, Controlling & Integrated Management, Tobacco Research Institute of Chinese Academy of Agricultural Sciences, Qingdao, 266101, China
					2Graduate School of Chinese Academy of Agricultural Sciences, Beijing, 100081, China.
					3State Tobacco Monopoly Administration, Beijing, 100045, China.
					4Sichuan tobacco company, Chengdu, 610017, China.
					5Hunan Tobacco Science Institute, Changsha, 410004, China.
					*Correspondence should be addressed to F.W. (e-mail: wangfenglong@ caas.cn) or J.Y. (e-mail: yangjinguang@caas.cn) Tel:/Fax: +86-532-88703236

## Sheet: Table S1
Table S1. Identifed lysine-ubiquitinated protein information for three replicates.
Protein information						Replicate.1							Replicate.2							Replicate.3
Protein accession	Position	Amino acid	Protein description	Detection	Gene name	Localization probability	PEP	Score	Modified sequence	Charge	Mass error [ppm]	MS/MS Count	Localization probability	PEP	Score	Modified sequence	Charge	Mass error [ppm]	MS/MS Count	Localization probability	PEP	Score	Modified sequence	Charge	Mass error [ppm]	MS/MS Count
A0A1S3X993	67	K	small glutamine-rich tetratricopeptide repeat-containing protein alpha-like isoform X3	2	LOC107762617	1	0.000310748	108.23	SLPDGK(1)DDQAQLDR	3	0.082496	2								1	0.000297254	113.76	SLPDGK(1)DDQAQLDR	3	0.089105	2
A0A1S4DK77	528	K	probable inactive receptor kinase At1g27190	3	LOC107830581	1	0.00519237	91.307	IK(1)DAIDQNICGK	3	0.32988	2	1	0.00314205	105.19	IK(1)DAIDQNICGK	3	0.029012	3	1	0.001016	107.65	IK(1)DAIDQNICGK	3	-0.30649	2
A0A1S4C6S2	25	K	26S protease regulatory subunit S10B homolog B-like	3	LOC107815805	1	0.0067417	153.95	LLQHK(1)ELDAR	3	-0.20226	2	1	1.24519e-21	157.68	LLQHK(1)ELDAR	3	0.24054	5	1	0.00212826	167.12	LLQHK(1)ELDAR	2	1.2074	3
A0A1S4DKK3	82	K	transcription factor IIIB 90 kDa subunit-like isoform X3	1	LOC107830788	1	0.0316313	42.797	K(1)ILWEK(1)MNK(1)EFAK	2	2.8855	1
A0A1S4D0S8	166	K	remorin-like	2	LOC107824746	1	0.0243038	54.198	IALLHK(1)EAEEK	3	0.074817	1	1	0.00320512	86.189	IALLHK(1)EAEEK	3	-0.88703	2
P27491	41	K	"Chlorophyll a-b binding protein 7, chloroplastic"	1	CAB7															0.888822	0.00841565	65.374	TVTK(0.889)AK(0.111)PVSSGSPWYGPDR	3	-0.18692	2
A0A1S4BXY1	649	K	receptor-like protein kinase FERONIA	3	LOC107813068	1	0.0133592	60.937	GLHYLHTGAK(1)HTIIHR	4	0.31287	1	1	0.0234386	44.691	GLHYLHTGAK(1)HTIIHR	4	-1.2264	1	1	0.00035313	83.869	GLHYLHTGAK(1)HTIIHR	4	-0.2368	1
A0A1S4BWC7	111	K	26S protease regulatory subunit 7 homolog A isoform X1	1	LOC107812550															1	0.0283937	50.473	YVINVK(1)QIAK	3	-0.69828	1
A0A1S4DIX3	304	K	neurofilament heavy polypeptide-like	1	LOC107830301								0.999944	0.0260701	57.106	LIHKEASLEALK(1)K(1)R	3	-0.12331	1
A0A1S3ZYG4	242	K	Bidirectional sugar transporter SWEET	1	LOC107791830															1	0.0274668	54.951	ELQNHVIISDEQK(1)K	3	1.7867	1
A0A077DCK9	4	K	Carbonic anhydrase	1	LOC107821152															0.990187	0.0305053	43.03	MAGK(0.99)FRK(0.01)CMLLCCSR	3	-3.0372	1
A0A1S3YG92	205	K	"phosphatidate cytidylyltransferase, mitochondrial-like isoform X2"	1	LOC107775861								1	0.0248032	52.5	MYK(1)SSLEEYAAK(1)NLLR	3	-2.5841	1
P68173	53	K	Adenosylhomocysteinase	3	SAHH	1	0.000729157	108.72	TEFGPSQPFK(1)GAK	2	0.25894	2	1	0.00237	101.72	TEFGPSQPFK(1)GAK	2	0.0085413	2	1	0.00214517	96.756	TEFGPSQPFK(1)GAK	2	1.3931	3
A0A1S3Y0V1	67	K	S-adenosylmethionine synthase	2	LOC107770931	1	0.0271513	52.167	ATIDYEK(1)IVR	3	-0.41749	1								1	0.0210406	55.084	ATIDYEK(1)IVR	3	-0.44495	1
O49911	37	K	Plasma membrane polypeptide	3	LOC107764465	1	0.00422182	95.618	TFDEAK(1)EQYSK	2	0.52569	3	1	1.38053e-17	153.34	TFDEAK(1)EQYSK	2	0.46647	2	1	0.0047891	111.63	TFDEAK(1)EQYSK	3	-0.0098418	4
A0A1S4CSV1	241	K	transcription factor DICHOTOMA-like isoform X2	1	LOC107822169	0.972279	0.026069	43.68	LETAK(0.039)GPLK(0.972)K(0.994)K(0.994)GK	2	-4.2627	1
A0A1S4ARC4	431	K	Serine hydroxymethyltransferase	1	LOC107800464	1	0.0111589	95.909	LLK(1)DFNK	2	1.5952	1
A0A1S4CTZ9	203	K	flowering locus K homology domain-like isoform X2	1	LOC107822433								1	4.3206e-05	84.436	LLVQAAQAGSLIGK(1)QGTTVK	3	0.57583	2
A0A1S4A6S4	498	K	"phosphoglucomutase, cytoplasmic-like"	1	LOC107794375								1	0.00125029	52.366	GIHSDVSNVVHGDEFEYK(1)DPVDSSISK	4	0.85431	1
A0A1S3Z7X0	181	K	vesicle-associated protein 4-1-like	1	LOC107784034															0.780309	0.00748978	56.428	QLAQAEAAAEADK(0.78)K(0.22)PPVDTGPK	4	0.57221	1
A0A1S3X5I0	89	K	Carbonic anhydrase	2	LOC107761423	1	3.55095e-08	164.53	NPELFGQLAK(1)GQSPK	2	1.3278	4	1	2.19396e-30	164.63	NPELFGQLAK(1)GQSPK	2	1.8524	5
A0A1S4AQZ9	95	K	uncharacterized protein LOC107800289 isoform X4	2	LOC107800289								1	0.00198616	97.472	K(1)CVQHWCNEK	3	-0.34837	2	1	0.000233499	130.41	K(1)CVQHWCNEK	3	-0.25069	1
A0A1S3YPC7	523	K	protein SIEVE ELEMENT OCCLUSION B-like isoform X2	2	LOC107778376	1	0.00110125	96.171	IPLEMLYVGK(1)R	3	-1.5745	1	1	0.00130862	97.813	IPLEMLYVGK(1)R	3	-1.2288	1
A0A1S4CXW3	299	K	uncharacterized protein LOC107823804	1	LOC107823804								1	0.0139908	72.34	K(1)PEK(1)FSDVTLLK	2	-4.0592	1
A0A1S4CHK0	125	K	ADP-ribosylation factor 2-like isoform X2	1	LOC107819113								1	7.05912e-45	161.31	QDLPNAMNAAEITDK(1)LGLHSLR	4	0.1484	3
A0A1S4BX25	84	K	uncharacterized protein LOC107812797	2	LOC107812797								0.82159	0.0349085	47.302	PRSPK(0.589)K(0.589)VK(0.822)CQDK	3	-1.2684	1	0.619318	0.0266111	58.132	PRSPK(0.452)K(0.929)VK(0.619)CQDK	3	-1.716	1
I7GVS5	318	K	Heat shock protein 70	2	NtHsp70	1	0.0147477	93.178	K(1)CMEPVEK	2	-0.46171	1								1	0.00775388	126.07	K(1)CMEPVEK	2	-0.34493	1
A0A1S3YNV9	8	K	uncharacterized protein LOC107778238	1	LOC107778238															0.9283	0.0338458	41.695	MDRK(1)LVVK(0.928)IAEGGK(0.072)CDEK	3	-0.87594	1
A0A1S3ZP17	96	K	MFP1 attachment factor 1-like	3	LOC107788999	1	0.000567686	89.507	LIESLSTPSILSK(1)R	3	-0.19762	1	1	0.00229503	76.868	LIESLSTPSILSK(1)R	3	0.22002	1	1	0.00849847	65.565	LIESLSTPSILSK(1)R	3	0.33004	1
A0A1S3YZU3	943	K	Plasma membrane ATPase	3	LOC107781513	1	0.00356422	82.515	LK(1)GLDIETIQQSYTV	2	0.32772	2	1	0.00784656	79.346	LK(1)GLDIETIQQSYTV	2	0.18192	1	1	0.00303301	95.264	LK(1)GLDIETIQQSYTV	2	0.51486	1
A0A1S4CXL3	24	K	protein PPLZ12	2	LOC107823701	1	0.0196621	60.255	K(1)AMNEINAAQR	3	-2.2162	1								1	0.0295221	58.274	K(1)AMNEINAAQR	3	2.6925	1
A0A1S4B2F2	7	K	BAHD acyltransferase DCR	1	LOC107803843	1	0.0170828	64.534	AGEVAK(1)EETVVTK	2	-0.85512	1
A0A1S4CQ71	240	K	actin-like	3	LOC107821481	1	6.44886e-06	87.793	TSSSVEK(1)SYELPDGQVITIGAER	3	0.022086	4	1	2.94885e-37	149.71	TSSSVEK(1)SYELPDGQVITIGAER	3	0.058975	3	1	7.21028e-15	112.57	TSSSVEK(1)SYELPDGQVITIGAER	3	0.72473	3
A0A1S4A6P7	149	K	glucomannan 4-beta-mannosyltransferase 2-like	3	LOC107794352	1	0.0168866	68.972	WASK(1)GLNITYQIR	2	-0.49534	1	1	0.00186116	105.95	WASK(1)GLNITYQIR	2	-0.19739	3	1	0.000271004	104.24	WASK(1)GLNITYQIR	2	-0.1077	3
A0A1S4AKW3	306	K	"ribulose bisphosphate carboxylase/oxygenase activase 2, chloroplastic-like"	3	LOC107798764	1	0.0309348	49.448	MEK(1)FYWAPTR	3	0.097248	1	1	0.0195074	87.184	MEK(1)FYWAPTR	2	1.5733	1	1	0.0227611	54.005	MEK(1)FYWAPTR	3	1.1512	1
A0A1S4CNX2	107	K	protein cornichon homolog 1-like	1	LOC107820840	1	0.00647402	111.65	FIESEK(1)K	2	1.146	1
A0A1S3ZW91	37	K	uncharacterized protein LOC107791111	1	LOC107791111															1	0.0238908	47.712	QK(1)LMLDIK(1)LMVK(1)R	3	4.3287	1
A0A1S4DGA2	151	K	uncharacterized protein LOC107829432	1	LOC107829432	1	0.0318805	62.546	MQNVWMK(1)LK	3	-4.3283	1
A0A1S4DQ90	54	K	PI-PLC X-box domain-containing protein DDB_G0293730-like	3	LOC107832296	1	0.0142084	56.286	NWMSALIPEK(1)LHVNK	3	-0.13968	2	1	0.00110257	90.229	KNWMSALIPEK(1)LHVNK	4	-0.010485	1	1	0.00110841	75.589	NWMSALIPEK(1)LHVNK	3	0.58976	2
A0A1S4CXW3	302	K	uncharacterized protein LOC107823804	1	LOC107823804								1	0.0139908	72.34	K(1)PEK(1)FSDVTLLK	2	-4.0592	1
A0A1S4B4R3	86	K	inactive leucine-rich repeat receptor-like protein kinase CORYNE	2	LOC107804523								1	0.00352405	90.913	GPVVFSPK(1)IPAK	3	-0.34374	1	1	0.00292228	78.488	GPVVFSPK(1)IPAK	3	-0.19647	1
A0A1S4AXD3	142	K	Histone H2B	2	LOC107802329	1	0.011948	93.598	AVTK(1)FTSS	2	-1.0525	3	1	0.0121865	104.44	AVTK(1)FTSS	2	-1.014	3
A0A076L1Z5	75	K	Remorin 2	3	LOC107810092	1	0.00259961	128.6	AWEESEK(1)SK	2	1.6791	1	1	0.00311335	121.73	AWEESEK(1)SK	2	0.81347	1	1	0.0201508	101.46	AWEESEK(1)SK	2	1.452	2
A0A1S4DNV0	58	K	kinesin-like protein KCA2	2	LOC107831563	1	0.000767235	110.53	SALESVDHK(1)R	3	0.11183	3	1	0.00438045	86.898	SALESVDHK(1)R	3	1.0178	3
Q84QE8	245	K	Oxygen evolving complex 33 kDa photosystem II protein	1	PsbO								1	0.0281104	62.633	GSSFLDPK(1)GR	2	0.92956	2
A0A1S3XAN2	218	K	"6-phosphofructo-2-kinase/fructose-2, 6-bisphosphatase-like isoform X6"	3	LOC107763053	1	0.00951867	79.451	HFNVGK(1)YR	3	-0.85785	1	1	0.0306946	54.611	HFNVGK(1)YR	3	0.10492	1	1	0.0324968	58.782	HFNVGK(1)YR	3	-0.2799	1
A0A1S3X344	840	K	uncharacterized protein LOC107760560	3	LOC107760560	1	8.29575e-05	96.489	K(1)GGPDAVCEHLCNLQK	3	-0.09603	2	1	5.00164e-08	122.16	K(1)GGPDAVCEHLCNLQK	4	0.36023	4	1	9.47998e-12	132.65	K(1)GGPDAVCEHLCNLQK	3	-0.49492	1
A0A1S4D8F1	26	K	V-type proton ATPase catalytic subunit A-like	1	LOC107827110	1	0.000140661	77.575	K(1)VSGPVVVADGMAGAAMYELVR	3	0.34768	3
Q9S820	126	K	NTGP2	1	rac								1	5.99035e-05	73.213	LDLRDDK(1)QFFIDHPGAVPITTAQGEELR	4	0.085936	1
A0A1S4D817	83	K	acyl-CoA-binding protein-like	1	LOC107826954								1	0.0216069	89.698	QLK(1)EEAASA	2	-0.4344	1
A0A1S4B8V7	41	K	V-type proton ATPase subunit B2-like	3	LOC107805728	1	0.00824132	90.913	GPK(1)YQEIVNIR	2	-0.52984	1	1	7.17975e-10	141.1	GPK(1)YQEIVNIR	3	-0.74618	3	1	0.000178553	113.69	GPK(1)YQEIVNIR	2	-1.2935	2
A0A1S3ZXV6	104	K	Phosphoinositide phospholipase C	2	LOC107791596	1	0.000611576	90.434	YLFADINPPINPK(1)R	3	-0.27821	2	1	0.0310543	46.069	YLFADINPPINPK(1)R	3	-0.24113	1
A0A1S4D975	241	K	elongation factor 1-gamma 2-like isoform X2	1	LOC107827359	0.987779	2.24436e-07	152.94	K(0.988)EEPK(0.012)FEEEEEAPKPK	3	-0.266	3
A0A1S3YYA3	28	K	ubiquitin receptor RAD23b-like isoform X3	2	LOC107780948								1	0.0247104	57.55	K(1)HIEDVQGK	3	-1.5751	1	1	0.0263827	60.398	K(1)HIEDVQGK	3	-0.37278	1
A0A1S4CZY0	73	K	calmodulin-5-like	1	LOC107824434	0.959476	0.0202646	79.639	K(0.959)MK(0.041)DTDSEEELK	3	-0.14058	1
A0A1S3YNM7	126	K	ubiquitin-conjugating enzyme E2 variant 1C isoform X2	3	LOC107778179	1	0.00087457	135.55	K(1)LVQPPEGTYF	2	0.89935	2	1	1.95408e-06	130.98	K(1)LVQPPEGTYF	2	0.7868	2	1	9.97506e-08	146.11	K(1)LVQPPEGTYF	2	0.51485	3
A0A1S4AAI5	55	K	V-type proton ATPase subunit a	2	LOC107795468	1	0.0174038	103.43	DLNAEK(1)SPFQR	2	2.7777	1	1	0.0040607	94.82	DLNAEK(1)SPFQR	2	1.1728	3
A0A1S4DPW3	222	K	uncharacterized protein LOC107832168	1	LOC107832168								1	0.0281854	51.436	EEK(1)TPLEIFR	3	0.38135	1
A0A1S4A2G2	336	K	condensin-2 complex subunit H2-like	2	LOC107793052	1	0.0360177	51.066	PYK(1)K(1)VK(1)SNR	3	-2.4825	1								1	0.01214	67.897	PYK(1)K(1)VK(1)SNR	3	-2.9964	2
A0A1S4CIE4	87	K	60S ribosomal protein L13-1-like	2	LOC107819210								1	0.0179706	59.634	K(1)LAPTIGIAVDHR	3	-0.1765	1	1	0.0142443	63.682	K(1)LAPTIGIAVDHR	3	-0.52054	1
A0A1S3X643	66	K	sm-like protein LSM36B	2	LOC107761481								1	0.0133738	66.568	NK(1)YGDAFIR	3	-0.59712	1	1	0.0170559	59.153	NK(1)YGDAFIR	3	0.22814	1
A0A1S4CB42	73	K	ubiquitin-conjugating enzyme E2 variant 1B-like isoform X2	1	LOC107817091	1	0.00179879	77.42	LFCGK(1)EYPDEPPGVR	3	-0.71453	1
A0A140G1Q8	370	K	Photosystem II CP43 reaction center protein	3	psbC	1	0.00602083	78.939	K(1)DIQPWQER	3	0.28607	1	1	0.0102328	72.243	K(1)DIQPWQER	3	0.2628	1	1	0.0179179	65.278	LK(1)K(1)DIQPWQER	3	1.7456	2
A0A1S4DK77	338	K	probable inactive receptor kinase At1g27190	1	LOC107830581								1	0.0176143	85.359	LSEK(1)QFR	2	-0.29666	1
A0A1S3Z6X4	51	K	ubiquitin receptor RAD23c-like	3	LOC107783652	1	1.68796e-23	135.98	NIETVQGSDVYPAGQQMLIHQGK(1)VLK	4	0.53849	7	1	1.86973e-44	156.32	NIETVQGSDVYPAGQQMLIHQGK(1)VLK	4	-0.10554	8	1	9.35791e-27	130.07	NIETVQGSDVYPAGQQMLIHQGK(1)VLK	4	-0.17158	10
A0A1S4CTL2	73	K	uncharacterized protein LOC107822425	1	LOC107822425								0.998097	0.0344102	54.343	K(0.999)LK(0.998)EARK(0.002)LINR	2	-2.4499	1
A0A1S3ZXE6	331	K	ubiquitin-like domain-containing CTD phosphatase	1	LOC107791500								1	4.43041e-13	127.87	NWESFNEDNFK(1)R	2	1.6127	2
A0A1S4AAI7	129	K	alpha-soluble NSF attachment protein-like	3	LOC107795501	1	0.00250054	82.705	HSVNNNLLK(1)YGVR	3	0.47027	1	1	0.00119708	90.861	HSVNNNLLK(1)YGVR	3	-0.49847	2	1	0.00879113	63.292	HSVNNNLLK(1)YGVR	3	0.41197	1
A0A1S3X9H4	40	K	Nucleoside diphosphate kinase	2	LOC107762688								1	0.0240044	51.359	AFAEK(1)HYADLSAK	3	1.3874	1	1	0.0143375	58.098	AFAEK(1)HYADLSAK	3	1.1409	1
A0A1S4ARC4	441	K	Serine hydroxymethyltransferase	3	LOC107800464	1	1.39233e-09	143.93	GLVNNK(1)EIEELK	2	-0.12406	4	1	2.20489e-25	137.01	GLVNNK(1)EIEELK	3	-0.097703	4	1	1.07701e-08	125.5	GLVNNK(1)EIEELK	2	0.51934	6
A0A1S4AG39	557	K	phototropin-1-like	3	LOC107797310	1	0.00397677	69.345	FLQGPETDPATVK(1)K	3	-1.6679	1	1	0.00115446	89.992	FLQGPETDPATVK(1)K	3	-1.6439	1	1	0.00299774	73.877	FLQGPETDPATVK(1)K	3	-2.0424	1
A0A1S4BXB1	409	K	protein DA1-related 2-like isoform X2	2	LOC107812764								1	1.79963e-08	96.848	NMPSTSTSSSSSTWSSSK(1)K(1)GGK	3	0.70758	1	1	0.000965406	71.651	NMPSTSTSSSSSTWSSSK(1)K(1)GGK	3	0.4134	1
A0A1S4DMY9	141	K	60S ribosomal protein L19-2	3	LOC107831514	1	0.0095003	69.672	VLMENIHK(1)TK	3	0.18554	1	1	0.00179581	97.472	VLMENIHK(1)TK	3	-0.44183	1	1	0.00414219	78.342	VLMENIHK(1)TK	3	0.00050663	1
A0A1S4D7C2	58	K	tobamovirus multiplication protein 1-like	3	LOC107826743	1	0.00966588	155.58	RFPIESK(1)GR	3	-0.034353	1	1	8.59143e-10	143.37	RFPIESK(1)GR	3	-0.90291	3	1	0.0102833	93.598	RFPIESK(1)GR	3	-0.36978	1
A0A1S4A8D1	99	K	17.3 kDa class II heat shock protein-like	1	LOC107794868	0.999992	0.0281461	54.343	K(0.001)REEEK(0.999)EGTK(1)YIR	3	1.8704	1
P27493	41	K	"Chlorophyll a-b binding protein 21, chloroplastic"	3	CAB21	1	0.0017004	71.263	TVAK(1)PVASSSPWYGPDR	3	0.14909	2	1	0.00315579	76.526	TVAK(1)PVASSSPWYGPDR	2	-2.1455	3	1	0.00069001	85.176	TVAK(1)PVASSSPWYGPDR	3	0.24866	1
A0A1S4DK72	99	K	peroxiredoxin-2B-like	1	LOC107830577															1	0.0269247	51.727	HVK(1)FLADGAGK	3	-0.14921	1
A0A1S3ZJI7	13	K	transcription factor MYB23-like	1	LOC107787587															0.995549	0.0185065	62.166	PTVDK(0.99)PK(0.014)QK(0.996)HK	3	-0.52537	1
A0A1S3XB94	95	K	TOM1-like protein 2	2	LOC107763152								0.797158	0.0324449	88.37	K(0.797)K(0.203)PDLNVR	3	-0.028648	1	0.930607	0.0122719	104.44	K(0.931)K(0.069)PDLNVR	3	-0.0094427	1
A0A1S4A3S2	69	K	non-symbiotic hemoglobin 2	1	LOC107793404	1	0.0199899	60.161	VFK(1)MTCESAVQLR	3	2.1226	1
A0A1S3ZMR1	1065	K	ABC transporter B family member 19	3	LOC107788417	1	0.0204725	53.038	FYDPTGGK(1)VMIDGK	3	0.30761	1	1	0.0230452	49.988	FYDPTGGK(1)VMIDGK	3	-0.13307	1	1	0.0011381	83.692	FYDPTGGK(1)VMIDGK	3	0.57633	1
A0A1S3ZAI2	725	K	uncharacterized protein LOC107784729 isoform X2	1	LOC107784729	1	0.0313298	63.816	HISK(1)YCTER	2	-1.5847	1
A0A1S3XH13	254	K	Patatin	2	LOC107764918								1	0.024773	42.818	EIMRGK(1)FQYEEMETMDNK	3	0.69252	1	1	0.0294692	44.998	EIMRGK(1)FQYEEMETMDNK	3	1.0704	1
A0A1S3XB94	319	K	TOM1-like protein 2	3	LOC107763152	1	0.00722525	73.841	TVDVK(1)SEPMR	3	0.32395	1	1	0.00145545	105.98	TVDVK(1)SEPMR	3	1.1836	1	1	0.0143876	94.309	TVDVK(1)SEPMR	2	-0.4562	3
A0A1S4B6T5	594	K	DNA helicase	3	LOC107805042	1	0.00350627	64.249	SASTNAK(1)TGGGTLPITAR	3	0.9301	1	1	0.000109193	86.453	SASTNAK(1)TGGGTLPITAR	3	-0.20557	1	1	0.0104676	53.554	SASTNAK(1)TGGGTLPITAR	3	0.042721	1
A0A1S3Z6X4	78	K	ubiquitin receptor RAD23c-like	2	LOC107783652								1	2.04795e-06	106.31	SK(1)SSPGEGSATSAAPTAK	2	0.87096	2	1	1.09127e-08	112.91	SK(1)SSPGEGSATSAAPTAK	3	0.53585	2
A0A1S3YQF5	273	K	renalase-like	3	LOC107778466	0.999861	0.017314	65.105	DVIAK(1)TGLQKPSSATLTK	3	0.15312	1	0.999999	3.56821e-09	118.71	DVIAK(1)TGLQKPSSATLTK	3	-0.037034	2	0.99999	2.00621e-12	129.36	DVIAK(1)TGLQKPSSATLTK	3	-1.0803	2
A0A1S4B2F6	1039	K	"putative pentatricopeptide repeat-containing protein At5g06400, mitochondrial"	1	LOC107803717															0.989197	0.0201928	61.265	QDLANTVLQMK(0.022)SDVK(0.989)K(0.989)R	2	0.18827	1
A0A1S4DGE6	249	K	uncharacterized protein LOC107829605 isoform X2	1	LOC107829605								1	0.00916533	67.415	SLSSVDLSK(1)HAVELEK(1)R	2	-3.6578	1
Q40466	76	K	Eukaryotic initiation factor 4A-13 (Fragment)	1		1	3.62276e-05	87.352	GIVPFCK(1)GLDVIQQAQSGTGK	3	-0.38965	1
A0A1S3X0K8	264	K	Bidirectional sugar transporter SWEET	2	LOC107760004	1	0.00411607	74.237	LGALVYSEK(1)FNAR	3	0.64791	1								1	0.00667613	66.393	LGALVYSEK(1)FNAR	3	-0.74142	1
A0A1S3Y225	5	K	"interactor of constitutive active ROPs 2, chloroplastic-like isoform X1"	1	LOC107771334															1	0.0181444	73.975	MQTPK(1)SR	2	3.6237	1
A0A1S4BST6	159	K	vesicle-associated membrane protein 722-like	1	LOC107811510								1	0.0206308	65.565	VLDRGEK(1)IELLVDK	3	-1.7242	1
Q9FSF6	51	K	60S ribosomal protein L11-1-like (Fragment)	2	rbl11-like	1	6.33885e-06	107.73	VLEQLSGQSPVFSK(1)AR	3	0.33564	5								1	7.78247e-07	110.57	VLEQLSGQSPVFSK(1)AR	3	0.46163	3
A0A1S4BWK5	83	K	NADP-dependent glyceraldehyde-3-phosphate dehydrogenase-like	2	LOC107812643								1	2.57708e-29	148.78	RAELLHK(1)AAAILK	3	0.29957	2	1	0.00698292	86.803	RAELLHK(1)AAAILK	3	0.11351	2
A0A1S4BWK5	25	K	NADP-dependent glyceraldehyde-3-phosphate dehydrogenase-like	2	LOC107812643								1	0.0332093	50.034	YYSEGEWK(1)K	3	0.060345	1	1	0.0182304	64.841	YYSEGEWK(1)K	3	0.24974	1
A0A1S4CYN9	42	K	"translocase of chloroplast 120, chloroplastic-like"	3	LOC107824053	1	0.0167012	71.316	KVQDVVGTVQGIK(1)VR	3	-0.12163	1	1	0.000306486	103.6	KVQDVVGTVQGIK(1)VR	3	-0.19232	2	1	0.00346558	81.526	KVQDVVGTVQGIK(1)VR	3	-0.056343	1
A0A075F2H4	94	K	Ubiquitin-conjugating enzyme E2 36-like protein	3	Ubc13-2	1	0.0027325	117.53	ICLDILK(1)DK	2	0.47537	4	1	0.00611698	117.01	ICLDILK(1)DK	2	-0.13447	1	1	0.00511774	106.2	ICLDILK(1)DK	2	0.067339	4
A0A1S4DK80	148	K	probable ribonuclease P/MRP protein subunit POP5	1	LOC107830686															1	0.0245375	48.216	VTPEIQQQMQNYLDK(1)IK	3	3.1106	1
A0A1S4ADX9	208	K	uncharacterized protein LOC107796604	2	LOC107796604	0.612505	0.00604486	97.472	VVDDDLK(0.387)K(0.613)PAK	3	0.35421	1	0.791465	1.4739e-08	133.81	VVDDDLK(0.209)K(0.791)PAK	2	0.48816	1
A0A1S3XU57	131	K	Carbonic anhydrase	3	LOC107768773	1	0.000921393	87.668	YEK(1)NPALYGELSK(1)GQSPK	3	0.62529	2	1	0.000652285	95.073	YEK(1)NPALYGELSK	2	0.2976	5	1	0.0136701	84.173	YEK(1)NPALYGELSK	3	0.33962	4
A0A1S3XH22	83	K	probable peroxygenase 4 isoform X2	3	LOC107765104	0.997964	0.0209433	78.903	FVPEK(0.002)FEELFK(0.998)K	3	-0.38724	1	0.999999	0.00243403	103.21	FVPEKFEELFK(1)K	3	0.095251	1	1	0.00306997	99.5	FVPEKFEELFK(1)K	3	-0.29541	1
P68173	282	K	Adenosylhomocysteinase	2	SAHH								1	0.00201666	96.171	GCAAALK(1)QAGAR	2	-1.6293	1	1	0.0198129	78.342	GCAAALK(1)QAGAR	2	0.22913	1
D6PZY5	58	K	RNA-binding glycine-rich protein	3	RGP-1a	0.996013	0.00119219	83.204	GFGFVTFK(0.004)DEK(0.996)AMR	4	-0.35801	2	0.994289	0.00179833	84.892	GFGFVTFK(0.006)DEK(0.994)AMR	4	-0.2734	2	0.997708	0.00100735	93.766	GFGFVTFK(0.002)DEK(0.998)AMR	4	-0.41558	3
A0A1S4D065	82	K	zinc finger CCCH domain-containing protein 32-like isoform X2	3	LOC107824541	1	0.00202551	94.692	AYGGK(1)MQLER	3	-0.8394	1	1	0.0071074	73.499	AYGGK(1)MQLER	3	-0.41809	1	1	0.00538059	75.509	AYGGK(1)MQLER	2	-0.63294	2
A0A1S4CY82	145	K	temperature-induced lipocalin-1-like	2	LOC107823890	1	0.00591244	97.813	AK(1)EVGYDVSK	2	-0.070283	1	1	0.0046261	101.39	AK(1)EVGYDVSK	2	0.42434	3
A0A1S3XU57	109	K	Carbonic anhydrase	3	LOC107768773	1	1.19698e-11	107.83	VDQITAELQSSDGSK(1)PFDPVEHMK	3	0.18495	2	1	3.12912e-05	72.399	VDQITAELQSSDGSK(1)PFDPVEHMK	3	-0.40456	4	1	4.64728e-07	86.073	VDQITAELQSSDGSK(1)PFDPVEHMK	4	0.1099	6
A0A1S4AKW3	171	K	"ribulose bisphosphate carboxylase/oxygenase activase 2, chloroplastic-like"	3	LOC107798764	1	4.25536e-05	107.39	VPLILGVWGGK(1)GQGK	3	0.045872	2	1	1.8471e-07	124.38	VPLILGVWGGK(1)GQGK	3	0.11178	2	1	0.000587516	87.831	VPLILGVWGGK(1)GQGK	3	-0.44115	2
A0A140G1S8	222	K	Cytochrome f	2	petA	1	0.00286239	79.514	EK(1)GGYEITITDASDGR	2	2.5972	1								1	1.65527e-10	130.47	EK(1)GGYEITITDASDGR	3	-0.20033	1
A0A1S3Z112	126	K	PITH domain-containing protein At3g04780-like	2	LOC107781867	0.999989	0.0217392	81.95	GKPVILK(1)YVK	3	0.42746	1								0.995322	0.0140071	81.525	GK(0.005)PVILK(0.995)YVK	3	-0.38853	1
A0A1S3XEF3	401	K	"Alpha-1,4 glucan phosphorylase"	3	LOC107764127	1	0.000291673	107.09	ILDHNAQK(1)PVVR	3	1.8739	1	1	0.000975407	96.229	ILDHNAQK(1)PVVR	3	0.76819	2	1	0.00598897	69.815	ILDHNAQK(1)PVVR	3	1.3295	1
A0A1S3YW64	194	K	Autophagy-related protein 3	1	LOC107780250															1	0.00126276	74.141	TYDISITYDK(1)YYQTPR	3	-1.2281	1
A0A1S3YHG4	20	K	uncharacterized protein DDB_G0286299-like	1	LOC107776082	0.999975	0.0176869	55.189	TSQTPSK(0.938)TK(0.062)SSSK(1)PASK(1)SK	3	-4.3704	1
A0A1S3XTJ7	234	K	uncharacterized protein LOC107768583	1	LOC107768583								1	0.0178543	61.56	SFFK(1)FLYEK	3	-1.2995	1
A0A1S4ARM1	240	K	actin-101-like	3	LOC107800553	1	0.00102889	64.589	SSSSVEK(1)SYELPDGQVITIGSER	3	0.79345	2	1	1.59237e-05	75.3	SSSSVEK(1)SYELPDGQVITIGSER	3	-2.8298	3	1	8.64816e-05	76.668	SSSSVEK(1)SYELPDGQVITIGSER	3	1.2676	2
A0A1S4AQ81	138	K	remorin-like	1	LOC107800107															1	0.0153256	100.25	ANLEAELK(1)K	3	-0.52516	3
A0A1S4D383	789	K	calmodulin-binding transcription activator 4-like isoform X3	1	LOC107825443								1	0.0342679	44.511	CRK(1)DFLAFRQK(1)VVK	3	-1.5302	1
A0A1S4AA99	5	K	T-complex protein 1 subunit beta-like	1	LOC107795385															0.999857	7.85976e-06	100.68	AIDK(1)IFKDEATEEKGER	4	-1.6573	1
A0A1S4DNR5	39	K	"keratin, type I cytoskeletal 9-like"	2	LOC107831789	1	0.0109506	70.47	IEGVYK(1)TSIDSEQGK	3	0.7622	1	1	0.000720237	89.624	IEGVYK(1)TSIDSEQGK	3	1.5924	2
A0A1S4CDB0	174	K	TOM1-like protein 2	3	LOC107817777	1	0.000475114	95.273	YLPVYEETYK(1)SLR	2	-0.14419	2	1	0.00156855	100.22	YLPVYEETYK(1)SLR	2	0.38784	4	1	0.000733703	96.82	YLPVYEETYK(1)SLR	2	-0.4734	3
A0A1S4C841	129	K	probable ADP-ribosylation factor GTPase-activating protein AGD14 isoform X3	1	LOC107815984	1	0.0132558	94.407	SLEK(1)PPR	2	-1.1505	1
A0A1S3Y0E6	39	K	DEAD-box ATP-dependent RNA helicase 56-like	1	LOC107770853															1	7.42082e-05	124.39	K(1)GYVGIHSSGFR	3	-0.76774	1
Q6IVK5	111	K	UDP-glucuronate decarboxylase 1	1	LOC107821562								1	0.0171375	46.249	IYHLACPASPIFYK(1)YNPVK	4	0.68012	1
A0A1S3YP75	82	K	protein RNA-directed DNA methylation 3	1	LOC107778095															1	0.011051	99.5	SNVEIK(1)NEPVR	2	0.34265	1
A0A1S4C2N7	337	K	uncharacterized protein LOC107814518	1	LOC107814518															1	0.00164601	80.488	NEEEEGSYLQEK(1)HFPSR	3	-0.53318	1
Q84QE5	176	K	Ribulose bisphosphate carboxylase small chain	1	LOC107771723								1	0.0261951	68.463	QVQCISFIAYK(1)PEGY	2	-0.12001	1
A0A1S4BS12	33	K	MLP-like protein 423	3	LOC107811017	1	3.47255e-10	116.58	DSTNLFPK(1)AFPDQYK	2	1.075	2	1	0.0018477	71.545	DSTNLFPK(1)AFPDQYK	2	-0.46177	3	1	9.42179e-05	111.07	DSTNLFPK(1)AFPDQYK	2	-0.17774	2
A0A1S3Z3P5	17	K	V-type proton ATPase catalytic subunit A-like	2	LOC107782425								1	1.55373e-51	162.39	PSLFGGPMTTFEDSEK(1)ESEYGYVR	3	-0.20496	3	1	2.39358e-25	134.86	PSLFGGPMTTFEDSEK(1)ESEYGYVR	3	-0.16219	2
A0A1S3ZLI4	10	K	probable methyltransferase PMT13	3	LOC107788240	1	0.008921	68.626	GHLNLPSSK(1)R	3	-0.57604	1	1	0.0132209	66.19	GHLNLPSSK(1)R	3	-0.29839	1	1	0.0335384	51.436	GHLNLPSSK(1)R	3	-0.84107	1
A0A1S3Z9L2	6	K	uncharacterized protein LOC107784451	1	LOC107784451								0.868258	0.0246354	54.205	EMLK(0.132)K(0.868)IK	2	-3.932	1
Q93XB9	25	K	Bax inhibitor 1	3	BI-1	1	0.0116781	66.92	WSYDSLK(1)NFR	3	-0.2679	1	1	0.0235569	56.043	WSYDSLK(1)NFR	3	-0.0078436	1	1	0.0147963	60.064	WSYDSLK(1)NFR	3	-0.4356	2
A0A1S4BZH8	210	K	Phosphoglycerate kinase	1	LOC107813429															0.999998	0.000591466	97.223	FYKEEEKNEPEFAK(1)K	3	0.23871	1
A0A1S4CZY0	92	K	calmodulin-5-like	3	LOC107824434	1	0.00776953	69.069	VFDK(1)DQNGFISAAELR	3	-0.12483	1	1	0.00129536	95.197	VFDK(1)DQNGFISAAELR	2	-0.84141	1	1	3.22525e-05	103.01	VFDK(1)DQNGFISAAELR	2	-0.22368	1
A0A1S4DM13	431	K	Signal recognition particle 54 kDa protein	2	LOC107831230	0.834148	0.0189749	58.172	IWSK(0.834)MK(0.976)GLK(0.19)IPK	2	0.031947	1	0.999109	0.0154256	58.172	IWSK(0.999)MK(0.999)GLK(0.002)IPK	2	0.43418	1
A0A1S4B7K3	54	K	ubiquitin receptor RAD23c-like isoform X2	3	LOC107805338	1	7.46521e-07	176.32	VLK(1)DTTTLEENK	2	0.042741	2	1	6.9075e-14	147.26	VLK(1)DTTTLEENK	2	-0.12423	3	1	2.83366e-05	153.34	VLK(1)DTTTLEENK	2	0.8925	2
A0A1S4A0F6	326	K	serine/threonine-protein kinase BIK1-like	1	LOC107792466								1	0.00862845	59.884	VFK(1)GVLSDGTAVAIK	3	-0.96251	1
A0A1S4CC76	490	K	cell division cycle protein 48 homolog	1	LOC107817432								1	0.00402935	61.963	ETVVEVPNVSWEDIGGLENVK(1)R	3	3.8761	1
A0A1S4CAZ2	189	K	"GDP-mannose 3,5-epimerase 1-like"	2	LOC107817046	1	0.00212656	98.105	HYNK(1)DFGIECR	2	0.70118	2								1	0.00299657	93.623	HYNK(1)DFGIECR	2	-0.53723	2
A0A1S3YJ63	149	K	topless-related protein 3-like	1	LOC107776850	1	0.0063479	73.841	K(1)LIEANPLFR	3	-0.98425	1
A0A1S4C8B5	4	K	agamous-like MADS-box protein AGL19	1	LOC107816198								1	0.0122953	61.344	MSRK(1)LELLENSK	3	-2.9365	1
A0A1S4BRZ8	71	K	26S proteasome non-ATPase regulatory subunit 2 homolog A-like	2	LOC107811279								1	0.000985309	69.979	VQDADPGLQK(1)VALESMR	3	-0.26525	1	1	0.00124591	72.932	VQDADPGLQK(1)VALESMR	3	0.17209	1
A0A1S3XPD3	272	K	transmembrane protein 45A-like	1	LOC107767347								1	0.0181526	67.519	TLLSK(1)YEQLQSR	3	-1.9254	1
A0A1S4BIC7	518	K	probable inactive receptor kinase At1g48480	3	LOC107808619	1	3.36247e-05	134.04	SSNVLLTK(1)SYDAR	3	-0.35233	3	1	0.008253	87.083	SSNVLLTK(1)SYDAR	3	-0.60237	3	1	2.44111e-08	143.56	SSNVLLTK(1)SYDAR	3	-0.26326	2
A0A1S4BSA2	309	K	"oxygen-evolving enhancer protein 1, chloroplastic-like"	1	LOC107811352	1	0.0354275	46.406	GSSFLDPK(1)GR	3	-0.182	1
A0A1S4DPX6	4	K	60S ribosomal protein L24	1	LOC107832170															1	0.034294	69.628	VLK(1)TELCR	3	0.27797	1
A0A1S3ZQM0	275	K	Eukaryotic translation initiation factor 3 subunit H	1	LOC107789396															0.999995	4.24409e-05	72.302	K(1)AAGEEPLPEEDPSNPIFKPLPEPSR	4	0.33827	1
A0A1S4DFC1	325	K	uncharacterized protein LOC107829109 isoform X2	1	LOC107829109								0.998991	0.0344606	55.851	EGK(0.999)TSTANK(0.022)NPANQK(0.979)EK	3	1.5113	1
A0A1S4BDW4	49	K	Non-specific serine/threonine protein kinase	1	LOC107807183	0.947076	0.0320697	48.229	SVAMK(0.765)VVGK(0.288)EK(0.947)VIK	2	4.1464	1
A0A1S4C8V8	9	K	Thioredoxin	3	LOC107816468	1	1.07276e-24	158.56	MEDQEQGTK(1)SR	2	0.69868	1	1	1.29399e-13	146.16	MEDQEQGTK(1)SR	2	-0.027386	1	1	1.20641e-08	147.62	MEDQEQGTK(1)SR	2	0.40864	1
Q40519	71	K	"Photosystem II 10 kDa polypeptide, chloroplastic"	2	PSBR	1	0.0114152	67.214	GK(1)GVYQFVDK	3	-0.47747	1	1	0.0141139	79.659	GK(1)GVYQFVDK	2	-1.4373	2
A0A1S4CXY0	361	K	homeobox protein ATH1-like	1	LOC107823800	0.822198	0.0342374	45.433	IIGQMNSEAK(0.178)K(0.822)K	2	-2.0867	1
A0A1S3ZYM9	678	K	5-methyltetrahydropteroyltriglutamate-- homocysteine methyltransferase-like	3	LOC107791827	1	0.00346905	83.869	SDEK(1)LLSVFR	2	1.1712	4	1	0.00468444	88.338	SDEK(1)LLSVFR	2	1.1417	3	1	0.00328351	82.261	SDEK(1)LLSVFR	3	-0.77199	2
A0A1S4BZ24	506	K	villin-3-like	1	LOC107813400								1	1.43118e-05	87.319	NYIADK(1)GLNDETYAADSVALIR	3	-1.6336	1
A0A1S4DA65	124	K	ubiquitin-NEDD8-like protein RUB2	2	LOC107827608								1	2.03555e-13	142.76	LIYAGK(1)QLADDK	2	-0.27895	4	1	0.000253305	107.09	LIYAGK(1)QLADDK	3	0.099414	3
A0A1S4CK56	62	K	phosphoprotein ECPP44-like	2	LOC107819908								0.549151	5.22045e-06	100.4	VSEEVAEYK(0.549)EEEK(0.348)K(0.102)EEK	3	0.85888	1	0.566435	0.000149279	92.939	VSEEVAEYK(0.566)EEEK(0.217)K(0.217)EEK	3	0.54272	1
A0A1S4B2J7	191	K	heat shock cognate 70 kDa protein 2	1	LOC107803885								1	4.51294e-05	99.813	IINEPTAAAIAYGLDK(1)K	2	-1.124	2
Q42941	147	K	Ascorbate peroxidase	1	APX	0.999894	1.22498e-19	113.31	DVFVK(1)QMGLSDKDIVALSGGHTLGR	3	3.5999	2
A0A1S4BPW2	645	K	"trifunctional UDP-glucose 4,6-dehydratase/UDP-4-keto-6-deoxy-D-glucose 3,5-epimerase/UDP-4-keto-L-rhamnose-reductase RHM1-like"	3	LOC107810647	0.866307	0.00334102	104.17	LK(0.866)K(0.134)EFPELLPIK	3	-0.40089	1	0.579259	0.0211203	77.279	LK(0.579)K(0.421)EFPELLPIK	3	-0.67886	1	0.564486	0.0307861	67.519	LK(0.564)K(0.436)EFPELLPIK	3	-0.23244	1
A0A1S3Y877	27	K	MLO-like protein 10	1	LOC107773399								0.826692	0.0297688	47.429	K(0.827)K(0.173)AGAK(0.797)GDK(0.203)STR	3	3.2618	1
A0A1S4AJ95	688	K	nucleobase-ascorbate transporter 12-like	1	LOC107798266															1	0.0271464	58.079	REPAVAK(1)DYELPFR	3	0.83624	1
A0A1S4DPX6	72	K	60S ribosomal protein L24	1	LOC107832170															1	0.00819903	102.06	DIAQEAVK(1)K(1)R	2	2.7235	1
A0A1S4AIL7	469	K	CTL-like protein DDB_G0274487	1	LOC107798100								1	0.028103	51.463	ASQDTWELFEK(1)R	3	1.24	1
A0A1S3Z673	150	K	"protein DCL, chloroplastic-like"	2	LOC107783260	1	0.0198162	62.582	FHPQFK(1)SR	3	-2.0729	1								1	0.033368	49.715	FHPQFK(1)SR	3	-0.65195	1
A0A1S3X5I0	79	K	Carbonic anhydrase	2	LOC107761423	1	0.00461593	71.933	YEK(1)NPELFGQLAK	3	0.50221	1	1	0.0253671	50.467	YEK(1)NPELFGQLAK	3	-0.086578	1
Q43798	623	K	Inorganic pyrophosphatase	1	ppa								1	4.11808e-11	104.95	QFNTIPGLMEGTAK(1)PDYATCVK	3	2.7583	4
A0A1S4DA65	87	K	ubiquitin-NEDD8-like protein RUB2	3	LOC107827608	1	0.00167064	68.639	TLTGK(1)EIEIDIEPNDTIDR	3	0.18965	2	1	2.25994e-05	89.859	TLTGK(1)EIEIDIEPNDTIDR	3	0.17083	3	1	1.79338e-06	92.474	TLTGK(1)EIEIDIEPNDTIDR	3	-0.3612	1
A0A1S3Z8Y2	474	K	heat shock 70 kDa protein 15-like	2	LOC107784103	1	0.000278981	90.498	ISTYTIGPFQSAK(1)GER	3	0.73578	1	1	0.0126694	70.451	ISTYTIGPFQSAK(1)GER	3	-0.81354	1
A0A1S4A931	196	K	uncharacterized protein LOC107795086	1	LOC107795086															1	0.0273485	65.295	MDVPK(1)K(1)EMSLALR	2	-1.3412	1
A0A1S4C2N5	311	K	"alpha-1,4-glucan-protein synthase [UDP-forming] 1"	2	LOC107814424								1	0.0170158	63.062	TVQQCYLELSK(1)QVK	3	0.35623	1	1	0.0122271	58.079	TVQQCYLELSK(1)QVK	3	-0.36268	1
A0A1S4CVR0	248	K	tobamovirus multiplication protein 2A-like	2	LOC107823134	1	0.00540066	59.342	EK(1)YGLDTSEFTYNPSDSNR	3	-0.02337	2	1	0.021446	45.707	EK(1)YGLDTSEFTYNPSDSNR	3	0.43319	1
P69249	176	K	"Ribulose bisphosphate carboxylase small chain, chloroplastic"	1	RBCS	1	0.00410713	81.239	QVQCISFIAYK(1)PEGY	2	0.087843	1
A0A1S4AVA2	38	K	copper transport protein ATX1-like isoform X2	3	LOC107801743	1	0.001542	80.102	MEGVESYDIDIK(1)EQK	3	0.52449	3	1	0.00081239	99.796	MEGVESYDIDIK(1)EQK	3	-0.67373	2	1	2.53273e-06	119.77	MEGVESYDIDIK(1)EQK	3	-0.25732	2
A0A1S4DBQ6	220	K	Glyceraldehyde-3-phosphate dehydrogenase	2	LOC107828122	1	0.0127072	52.731	AASFNIIPSSTGAAK(1)AVGK	3	-0.78354	1								1	0.0257225	44.735	AASFNIIPSSTGAAK(1)AVGK	3	0.19771	1
A0A1S4BFP2	66	K	cytochrome b5-like	2	LOC107807722								1	5.84626e-05	95.755	DATDEFEDAGHSK(1)DAR	4	-0.53992	1	1	0.00199467	68.413	DATDEFEDAGHSK(1)DAR	4	0.38636	1
A0A1S4AA99	15	K	T-complex protein 1 subunit beta-like	3	LOC107795385	1	0.0102613	86.262	IFKDEATEEK(1)GER	3	0.79351	1	0.999919	0.0267118	65.809	IFKDEATEEK(1)GER	3	-0.08448	1	0.999998	0.00717569	83.53	IFKDEATEEK(1)GER	3	0.69823	2
A0A1S4DA65	33	K	ubiquitin-NEDD8-like protein RUB2	1	LOC107827608															1	1.74782e-08	187.63	IQDK(1)EGIPPDQQR	2	0.59091	78
A0A1S4CZG2	119	K	uncharacterized protein LOC107824303 isoform X2	1	LOC107824303	0.841079	0.00558069	67.095	K(0.841)EAMK(0.16)FLEK(0.999)LTTCMGK	3	0.97513	1
A0A1S3YN16	657	K	putative late blight resistance protein homolog R1A-3 isoform X3	1	LOC107777712								0.997243	0.0340662	54.539	K(0.003)VFGEK(0.997)SCPK	3	2.7633	1
A0A1S4CGN9	79	K	"monodehydroascorbate reductase 4, peroxisomal-like"	1	LOC107818762	1	0.0353286	58.167	LTPK(1)WYK	3	-0.37396	1
A0A1S4DJU1	66	K	Proteasome subunit beta	2	LOC107830555	1	0.0108326	49.613	SVGK(1)HSLLGASGEISDFQEISR	3	-2.6921	1	1	0.000330841	72.99	SVGK(1)HSLLGASGEISDFQEISR	3	-0.96251	2
A0A1S4BR79	427	K	Ubiquitin carboxyl-terminal hydrolase	3	LOC107811059	1	0.0324173	48.115	MNSGK(1)PDFDPSR	3	-0.56176	1	1	0.0214376	62.081	MNSGK(1)PDFDPSR	3	-0.21152	2	1	0.0321827	48.115	MNSGK(1)PDFDPSR	3	-0.25906	1
A0A1S3XNT9	142	K	uncharacterized protein LOC107767119	1	LOC107767119								1	0.00410011	70.438	K(1)HTAPK(1)GGVTK(1)PK	2	-2.3866	1
A0A1S3Y0V1	387	K	S-adenosylmethionine synthase	3	LOC107770931	0.787284	0.000274224	93.115	DDPDFTWEVVK(0.094)PLK(0.787)WEK(0.119)PQA	3	0.15827	3	0.965945	0.000446558	80.459	DDPDFTWEVVK(0.002)PLK(0.966)WEK(0.032)PQA	3	-0.53544	2	0.578541	7.01476e-10	107.69	DDPDFTWEVVKPLK(0.579)WEK(0.421)PQA	3	-0.26502	5
A0A1S3ZJ61	38	K	serine/arginine-rich splicing factor SC35-like	1	LOC107787334								1	0.0309371	55.335	TTADDLYPLFDK(1)YGK	3	1.0256	2
I7GVS5	506	K	Heat shock protein 70	2	NtHsp70	1	0.0176373	75.509	NK(1)ITITNDK(1)GR	3	0.54373	2								1	0.00228131	95.523	NK(1)ITITNDK(1)GR	3	-0.33101	3
A0A1S4BH10	5	K	heterogeneous nuclear ribonucleoprotein 1-like	1	LOC107808160	1	0.0134575	71.879	K(1)SDFGDGASPGK	2	-0.4667	1
A0A1S3ZYK2	90	K	nascent polypeptide-associated complex subunit alpha-like protein	3	LOC107791866	0.999945	0.0240152	67.299	SK(1)NILFVISKPDVFK	3	0.74866	1	0.998409	0.00647279	70.167	SK(0.998)NILFVISK(0.002)PDVFK	3	0.47213	1	0.999565	0.0193401	63.681	SK(1)NILFVISKPDVFK	3	-0.67946	1
A0A1S4A5S5	311	K	"protein kinase 2B, chloroplastic-like"	1	LOC107794062															1	0.0154942	44.183	TVDNTK(1)VGVEQNLVDWAK(1)PYLGDK(1)RR	4	0.18753	1
A0A1S4ANB9	151	K	peroxisomal (S)-2-hydroxy-acid oxidase-like	1	LOC107799508															1	0.0055367	64.374	AGFK(1)AIALTVDTPR	3	-0.2973	1
A0A1S3XSY3	51	K	uncharacterized protein LOC107768353	1	LOC107768353								1	0.0263625	43.042	LLPGPHFDPPPK(1)EEVR	4	-0.40325	1
A0A1S4DEI8	137	K	probable protein phosphatase 2C 10 isoform X2	3	LOC107828986	1	0.00573069	81.625	K(1)LWIANVGDSR	3	0.19143	1	1	0.00489735	79.036	K(1)LWIANVGDSR	3	-0.46045	1	1	0.000760751	105.03	K(1)LWIANVGDSR	3	-0.31174	1
A0A1S3YNL2	16	K	"putative methylesterase 11, chloroplastic"	1	LOC107778030															0.784562	0.0340858	40.645	GNSLACFSEK(0.285)NQATK(0.785)VRK(0.93)SNK	3	2.0091	1
A0A1S4DA91	84	K	translationally-controlled tumor protein homolog	1	LOC107827662	1	0.0193446	68.383	K(1)QFVAYMK	2	-0.64086	1
A0A1S4AAS9	148	K	V-type proton ATPase subunit E-like	3	LOC107795598	1	0.0126991	54.859	K(1)HDVHLVEHVLDAAK	4	-0.37033	2	1	4.17388e-09	101.05	K(1)HDVHLVEHVLDAAKEEYAEK	3	-0.064438	4	1	2.08816e-20	136.61	K(1)HDVHLVEHVLDAAKEEYAEK	4	-0.58865	3
A0A1S4DEV5	853	K	transducin beta-like protein 3	3	LOC107829068	0.997838	0.0261172	75.738	EK(0.002)RSSK(0.998)K(1)R	3	0.15872	1	0.819277	0.0183476	68.224	EK(0.184)RSSK(0.819)K(0.996)R	3	-0.16561	1	0.820382	0.0302299	82.279	EK(0.19)RSSK(0.82)K(0.989)R	3	-0.31871	1
A0A1S4BC06	218	K	patellin-3-like	1	LOC107806665	0.999534	0.0212966	57.267	VK(0.001)DSFAMLK(1)K(1)TILWR	2	-1.2834	1
A0A1S3Y7T8	57	K	sorbitol dehydrogenase	1	LOC107773322								1	0.00885875	81.327	AVGICGSDVHYLK(1)TLR	3	1.3527	1
A0A1S3ZNF7	443	K	polyubiquitin-like	3	LOC107788853	1	3.69202e-07	135.91	TLADYNIQK(1)ESTLHL	2	0.56553	3	1	1.477e-37	169.17	TLADYNIQK(1)ESTLHL	2	0.60646	3	1	5.06632e-08	149.3	TLADYNIQK(1)ESTLHL	2	0.36151	1
A0A1S3X170	569	K	Pescadillo homolog	1	LOC107760163	0.997752	0.0313755	68.463	K(0.998)LLDAMK(0.003)MGK(0.999)EK(1)K	2	0.33423	1
Q9FSF6	37	K	60S ribosomal protein L11-1-like (Fragment)	2	rbl11-like	1	0.00452891	68.625	AAK(1)VLEQLSGQSPVFSK(1)AR	4	-0.026637	3								1	0.0104832	56.553	AAK(1)VLEQLSGQSPVFSK(1)AR	3	0.12473	2
A0A1S3YDV1	469	K	pre-mRNA-processing factor 19 homolog 1-like	1	LOC107775142															1	0.0117405	56.46	VFQVASVK(1)AEWNHIK	3	-0.088785	1
A0A1S4BDK6	66	K	ubiquitin-conjugating enzyme E2 2 isoform X2	3	LOC107807136	1	1.73481e-06	109.04	LTLQFSEDYPNK(1)PPTVR	3	0.20489	2	1	1.025e-07	115.58	LTLQFSEDYPNK(1)PPTVR	3	-0.41811	1	1	0.000685246	78.078	LTLQFSEDYPNK(1)PPTVR	3	0.28396	1
A0A1S3YHG4	10	K	uncharacterized protein DDB_G0286299-like	1	LOC107776082	0.938129	0.0176869	55.189	TSQTPSK(0.938)TK(0.062)SSSK(1)PASK(1)SK	3	-4.3704	1
A0A1S4ARC4	452	K	Serine hydroxymethyltransferase	3	LOC107800464	1	0.0318128	46.162	ADVEK(1)FSSSFDMPGFK	3	0.28975	1	1	0.0055779	61.265	ADVEK(1)FSSSFDMPGFK	3	-0.063662	2	1	0.0352757	44.734	ADVEK(1)FSSSFDMPGFK	3	0.12002	1
A0A1S3ZXY2	55	K	cell division cycle protein 48 homolog isoform X2	3	LOC107791620	1	0.00476875	74.776	KDTVVIALADETCDEPK(1)IR	3	1.4635	1	1	0.00127978	79.695	KDTVVIALADETCDEPK(1)IR	3	-0.18129	1	1	3.87941e-07	102.36	DTVVIALADETCDEPK(1)IR	3	0.23032	2
A0A1S3YAF1	128	K	E3 ubiquitin protein ligase RIE1-like	1	LOC107774254	0.917515	0.0142533	63.062	FHICK(0.082)DEEK(0.918)PSVGAGK	4	-0.64371	1
A0A1S3ZJ61	72	K	serine/arginine-rich splicing factor SC35-like	1	LOC107787334															1	0.00672689	105.2	YADEAQK(1)AVDR	2	-0.98093	1
A0A1S4DPC4	13	K	F-box/FBD/LRR-repeat protein At1g13570-like	1	LOC107831998								0.998484	0.0306357	84.817	VEGDK(0.998)LK(0.002)LDR	2	-0.57913	1
A0A1S4BEF8	91	K	40S ribosomal protein S12	1	LOC107807381								1	0.0265975	56.404	K(1)VVGCGCVVVK	3	0.9633	1
A0A1S4AI99	653	K	protein VACUOLELESS1-like	1	LOC107798004								1	0.0297852	57.034	LIEK(1)SQHLFAETK	3	1.5423	1
Q40589	136	K	Cytosolic ascorbate peroxidase	2	LOC107759703								1	0.00208692	87.641	LPDATK(1)GSDHLR	3	-0.40954	1	1	0.00187644	90.614	LPDATK(1)GSDHLR	3	-0.1584	1
A0A1S4B6T0	3	K	elongation factor 2-like	1	LOC107805110								1	0.0168493	77.662	VK(1)FTAEELR	3	0.099981	1
A0A1S3XCY6	278	K	hydroquinone glucosyltransferase-like	3	LOC107763711	1	0.00231767	99.752	GLMEGEEGK(1)GVR	2	-0.53549	4	1	1.48418e-09	137.01	GLMEGEEGK(1)GVR	3	0.24988	4	1	8.35274e-08	145.28	GLMEGEEGK(1)GVR	2	-0.0088913	3
A0A1S3Y2J0	824	K	villin-4-like	1	LOC107771362								1	0.0353394	55.04	SVTPDSAK(1)LAPR	3	2.9474	1
A0A1S4BWK5	31	K	NADP-dependent glyceraldehyde-3-phosphate dehydrogenase-like	3	LOC107812643	1	6.41254e-06	126.07	SASGK(1)SVAIINPTTR	2	-0.37777	4	1	1.98649e-05	112.12	SASGK(1)SVAIINPTTR	3	-0.033189	4	1	4.47376e-05	107.82	SASGK(1)SVAIINPTTR	2	0.2474	4
A0A1S4DB02	117	K	uncharacterized protein LOC107827840	1	LOC107827840															1	0.0193082	61.56	DIK(1)EIVANK(1)R	3	0.17857	1
A0A1S4C2S1	259	K	40S ribosomal protein S2-3-like	3	LOC107814537	1	7.84119e-11	171.15	SPFQEYADILSK(1)PANK	3	-0.15632	4	1	3.00695e-30	153.72	SPFQEYADILSK(1)PANK	2	-0.76165	3	1	7.14566e-18	209.89	SPFQEYADILSK(1)PANK	2	-2.5751	3
A0A1S4A509	167	K	protein TPR2-like isoform X2	2	LOC107793747								0.999997	0.016787	69.03	DKLTFPSFK(1)ASR	3	-0.46786	1	1	0.00283665	83.226	DKLTFPSFK(1)ASR	3	0.52565	1
A0A1S3YC97	8	K	ras-related protein Rab7 isoform X3	2	LOC107774659								1	0.0243043	113.41	K(1)FSNQYK	2	-0.57115	1	1	0.027145	110.12	K(1)FSNQYK	2	-1.2782	1
A0A1S4AF24	40	K	B2 protein-like	2	LOC107796934	0.616284	0.00934297	97.472	LSEQMK(0.384)YK(0.616)GER	2	0.75569	4								0.77524	0.00684344	105.17	LSEQMK(0.225)YK(0.775)GER	2	0.98876	3
A0A1S4CAZ2	290	K	"GDP-mannose 3,5-epimerase 1-like"	2	LOC107817046	1	0.00012961	95.264	K(1)LPIHHIPGPEGVR	4	0.23827	6								1	0.012883	69.261	K(1)LPIHHIPGPEGVR	2	1.5613	1
A0A1S3ZGP0	319	K	calcium-dependent protein kinase 11-like	1	LOC107786544	1	0.0299471	46.892	QFCDMNK(1)LK(1)K(1)MALRVIAER	3	2.8236	1
O22402	347	K	Guanosine nucleotide diphosphate dissociation inhibitor	1	GDI								0.999853	0.0235519	43.216	KSDMYLFCCSYTHNVAPK(1)GK	4	0.36538	1
A0A1S4CWX7	86	K	40S ribosomal protein S7	1	LOC107823503															1	0.0121581	97.565	ELEK(1)K(1)FSGK	2	-0.16041	1
A0A1S4DHG4	159	K	uncharacterized protein LOC107829843	1	LOC107829843	1	0.0323544	62.466	LGFSK(1)LSENPA	2	-0.54417	1
A0A1S3XH03	107	K	NADP-dependent alkenal double bond reductase P1-like isoform X2	1	LOC107765034															1	0.0262026	51.463	VVGSVGSDDK(1)VK	3	0.31059	1
A0A1S3XNT9	147	K	uncharacterized protein LOC107767119	1	LOC107767119								1	0.00410011	70.438	K(1)HTAPK(1)GGVTK(1)PK	2	-2.3866	1
A0A1S3XKL8	302	K	Eukaryotic translation initiation factor 3 subunit L	2	LOC107766223								1	0.00636379	78.113	ILLYIYK(1)TK	3	0.46145	2	1	0.0139038	61.691	ILLYIYK(1)TK	3	0.61786	1
A0A1S4AWH7	117	K	zinc finger MYM-type protein 1-like	1	LOC107802120								1	0.0346706	44.998	GQSYDGASNMQGK(1)MNGLK	2	-2.8266	1
A0A1S4AP72	158	K	uncharacterized protein LOC107799819	1	LOC107799819								0.974594	0.00836031	78.529	K(0.975)LEELSK(0.025)SIETIR	3	0.29573	1
A0A1S3XHR6	3	K	protein NRT1/ PTR FAMILY 4.3-like	1	LOC107765139								1	0.0307793	64.207	NK(1)QMEMER	2	0.46634	1
P68173	211	K	Adenosylhomocysteinase	3	SAHH	1	1.03739e-06	137.09	LVGVSEETTTGVK(1)R	2	0.24277	4	1	1.44509e-43	174.72	LVGVSEETTTGVK(1)R	2	0.53092	3	1	2.62586e-06	158.11	LVGVSEETTTGVK(1)R	2	0.5165	5
A0A1S4A077	400	K	uncharacterized protein LOC107792307 isoform X2	1	LOC107792307	1	0.0349924	49.3	GAK(1)K(1)NAMEDDK	3	-0.92103	1
Q76MF4	87	K	Calmodulin NtCaM1	1	NtCaM2								1	0.02798	58.098	DTDSEEELK(1)EAFK	3	-0.46789	1
A0A1S4AI39	128	K	DEAD-box ATP-dependent RNA helicase 8-like	3	LOC107797871	1	0.00706647	58.635	TEDVTATK(1)GNEFEDYFLK	3	0.38268	2	1	0.000576914	71.402	TEDVTATK(1)GNEFEDYFLK	3	-0.93541	2	1	0.00545925	57.708	TEDVTATK(1)GNEFEDYFLK	3	-0.66192	2
A0A1S4DEI7	331	K	premnaspirodiene oxygenase-like	2	LOC107828889	0.886051	0.0144279	77.533	IMK(0.114)K(0.886)AQDEVR	2	-1.2697	1	0.788349	0.0210322	70.552	IMK(0.212)K(0.788)AQDEVR	2	-0.57036	1
A0A1S4D817	4	K	acyl-CoA-binding protein-like	2	LOC107826954								1	0.00176789	81.278	GLK(1)EDFEEHAELAK	4	1.6236	2	1	0.000979015	83.243	GLK(1)EDFEEHAELAK	4	1.3979	3
A0A1S3Z7K3	30	K	actin-depolymerizing factor 1 isoform X2	1	LOC107783829								1	5.92887e-60	192.65	IEEK(1)QK(1)QVVVEK	4	0.87859	3
A0A1S3ZUI8	443	K	heat shock cognate protein 80-like	3	LOC107790625	1	0.000292558	93.649	YHSTK(1)SGDEMTSLK	3	-0.61541	2	1	0.00180026	80.746	YHSTK(1)SGDEMTSLK	3	-0.11552	1	1	0.00423766	67.234	YHSTK(1)SGDEMTSLK	3	-0.024757	1
A0A1S3ZJE0	2	K	protein MIZU-KUSSEI 1-like	1	LOC107787388															0.744122	0.0265268	47.548	MK(0.744)SNMAK(0.257)RFQDLSSK(0.999)R	3	-1.6443	1
P69040	69	K	Eukaryotic translation initiation factor 5A-1	2	EIF-5A1								1	0.017348	58.098	CHFVAIDIFTGK(1)K	3	-0.13732	1	1	0.0159698	62.732	CHFVAIDIFTGK(1)K	3	0.1779	1
A0A1S4CM37	68	K	uncharacterized protein LOC107820507	1	LOC107820507								0.74758	0.0233144	51.528	SMDK(0.748)K(0.748)K(0.505)SVGK	2	-0.063106	1
A0A1S3ZMR1	15	K	ABC transporter B family member 19	1	LOC107788417								0.997926	0.0230701	45.213	AETTEGK(0.002)PMPEAEK(0.998)K	3	0.36198	1
A0A0A8WK73	14	K	Aquaporin PIP1 4	3	LOC107817177	1	0.0101242	91.265	LGANK(1)YSER	2	1.7238	1	1	0.004067	120.31	LGANK(1)YSER	2	0.87826	2	1	0.023695	54.066	LGANK(1)YSER	3	0.044191	1
A0A1S4D5T7	290	K	AP-2 complex subunit alpha	1	LOC107826292															1	0.019704	65.295	ILMGTDVVK(1)NVNK	3	-0.42061	1
A0A1S4BAQ2	566	K	protein argonaute 1-like isoform X3	1	LOC107806342															1	0.0241987	66.267	ISEK(1)LAQVEAR	3	2.3165	1
A0A1S3Y2J0	261	K	villin-4-like	1	LOC107771362								1	7.44035e-07	116	VQK(1)GQAEPLEIESLTR	2	0.31377	3
A0A1S3ZJY6	5	K	RPM1-interacting protein 4-like isoform X1	3	LOC107787733	1	0.0321647	104.42	SQEK(1)GQPLPK	2	-0.15416	1	1	9.63533e-05	123.96	SQEK(1)GQPLPK	2	-0.011997	1	1	0.000754405	123.51	SQEK(1)GQPLPK	2	-0.78922	1
P68173	17	K	Adenosylhomocysteinase	3	SAHH	1	0.000384264	97.797	VK(1)DMSQADFGR	2	-0.38754	3	1	0.0103063	81.625	VK(1)DMSQADFGR	2	-0.072578	3	1	0.0024427	82.529	VK(1)DMSQADFGR	2	0.21122	2
A0A1S3XGK4	517	K	heat shock cognate protein 80-like	1	LOC107764955	1	0.0129707	81.771	LVSATK(1)EGLK	3	0.094456	2
A0A1S4CDB0	38	K	TOM1-like protein 2	1	LOC107817777								1	0.0234441	51.726	ITAGMSSMSFK(1)MK	3	0.13684	1
Q08IJ1	16	K	ADP ribosylation factor	2	ARF	1	0.0232004	91.853	LFAK(1)K(1)EMR	2	0.45677	3								1	0.0131321	83.206	LFAK(1)K(1)EMR	3	-0.24096	1
A0A1S4DA65	29	K	ubiquitin-NEDD8-like protein RUB2	1	LOC107827608															1	1.55771e-29	230.96	AK(1)IQDK(1)EGIPPDQQR	3	-0.29744	47
A0A1S4CPT1	415	K	probable inactive receptor kinase At2g26730	2	LOC107821089								1	0.0194854	60.102	AFYYSK(1)DEK	3	0.7438	1	1	0.0091263	68.626	AFYYSK(1)DEK	3	-0.37577	1
A0A1S4D985	45	K	serine--glyoxylate aminotransferase-like	1	LOC107827351	1	0.000106139	89.232	SPAVPALTK(1)VLLEDVK	3	0.34603	1
A0A1S4BMV6	278	K	glycine-rich domain-containing protein 1-like	3	LOC107809983	1	0.00250119	86.772	TTK(1)QWEETYGSR	3	1.9344	1	1	0.00531653	94.122	TTK(1)QWEETYGSR	2	-1.6439	2	1	0.0102022	85.554	TTK(1)QWEETYGSR	2	0.90037	1
A0A1S4BGQ5	2	K	acyl-coenzyme A thioesterase 13-like	1	LOC107808082	1	0.0296865	44.863	MK(1)QMDIESVK	2	1.7109	1
A0A1S4DHK7	134	K	9-divinyl ether synthase-like	2	LOC107829877	1	0.0004155	96.82	GLFLSTLAK(1)LHDK	3	-0.20738	1								1	0.00284164	74.537	GLFLSTLAK(1)LHDK	3	-0.07803	1
A0A1S3XKG1	337	K	E3 ubiquitin protein ligase	1	LOC107766185															0.99986	0.00293761	68.329	DQLAK(1)AK(0.999)ADVSLYQSLYK(0.001)K	3	1.3899	1
Q9SDQ5	63	K	GTP-binding protein SAR1A-like	1	LOC107783796								1	5.35323e-05	84.113	LVQHQPTQYPTSEELSIGK(1)IK	3	2.4111	3
A0A1S4CTA1	142	K	uncharacterized protein LOC107822326	1	LOC107822326															0.694444	0.0230505	41.41	DGK(0.091)PEK(0.215)PSK(0.694)SIMIIRASESNSVK	3	-0.47809	1
A0A1S4D0S8	192	K	remorin-like	2	LOC107824746	1	0.00730236	101.25	AEELAAK(1)YR	2	0.13115	1	1	0.0235934	80.219	AEELAAK(1)YR	3	-0.38278	2
A0A1S3X728	84	K	uncharacterized protein LOC107761896	1	LOC107761896															0.78623	0.0327966	44.925	VDK(0.786)VK(0.201)CYNCDK(0.012)K(0.001)GHYVR	3	1.2076	1
Q9FSF0	240	K	Malate dehydrogenase	3	MD1	1	2.95195e-10	152.68	K(1)LSSALSAASSACDHIR	3	-0.28469	1	1	8.22936e-12	126.42	K(1)LSSALSAASSACDHIR	4	-0.29311	2	1	2.42732e-10	152.25	K(1)LSSALSAASSACDHIR	3	-0.52091	1
A0A1S4A8D1	95	K	17.3 kDa class II heat shock protein-like	1	LOC107794868	0.999475	0.0281461	54.343	K(0.001)REEEK(0.999)EGTK(1)YIR	3	1.8704	1
A0A1S3WZU4	583	K	RBR-type E3 ubiquitin transferase	3	LOC107759684	1	7.21142e-14	138.28	LHQCAEK(1)ELQGYLDAEGPSK	3	-0.23165	5	1	8.00876e-25	128.01	LHQCAEK(1)ELQGYLDAEGPSKEFNEFR	4	-0.2427	5	1	1.28284e-10	109.22	LHQCAEK(1)ELQGYLDAEGPSK	4	0.2747	4
Q68GS0	72	K	SKP1	1	SKP1	1	0.00291936	99.283	TEDK(1)ASEDELK	2	-0.00083186	1
A0A1S4B126	154	K	ras-related protein RABE1a	3	LOC107803437	1	0.000121056	93.342	GQALADEYGIK(1)FFETSAK	3	1.4601	1	1	0.000100708	87.088	GQALADEYGIK(1)FFETSAK	3	1.4939	2	1	0.000906951	74.732	GQALADEYGIK(1)FFETSAK	3	1.7099	1
A0A1S3ZXV6	505	K	Phosphoinositide phospholipase C	1	LOC107791596								0.623798	0.00387011	84.859	K(0.624)TK(0.376)TLEDNWIPTWDEK	3	-1.3422	1
A0A1S3Y9M0	269	K	Diacylglycerol kinase	3	LOC107773804	0.999999	1.6427e-05	70.449	LETPHSLKPTEDASLDQELDIDGELPK(1)K	5	0.075815	5	1	1.35261e-13	96.052	LETPHSLKPTEDASLDQELDIDGELPK(1)K	4	0.0097012	4	1	2.11608e-26	115.79	LETPHSLKPTEDASLDQELDIDGELPK(1)K	4	-0.011263	2
Q84QE8	135	K	Oxygen evolving complex 33 kDa photosystem II protein	2	PsbO								1	0.00028561	117.27	K(1)FCLEPTSFTVK	2	0.17595	3	1	0.0015567	97.463	K(1)FCLEPTSFTVK	2	-0.35634	3
A0A1S3XZK8	13	K	uncharacterized protein LOC107770473	1	LOC107770473	1	0.0201663	59.367	TMLIDSGIAK(1)K	2	-1.6498	1
A0A1S3ZMB3	128	K	putative cyclin-A3-1	1	LOC107788519															1	0.0277229	48.602	K(1)MEIEEK(1)R	3	-1.6452	1
A0A1S3ZXV5	355	K	squalene synthase-like	3	LOC107791556	1	0.00406435	86.262	VNNNDPNATK(1)TLK	2	0.78086	2	1	0.00211627	104.17	VNNNDPNATK(1)TLK	2	0.82976	3	1	6.9104e-05	112.08	VNNNDPNATK(1)TLK	3	0.77372	2
A0A1S4DB64	1026	K	probable ubiquitin conjugation factor E4	2	LOC107827966								1	0.0221597	41.672	HGEDLNLQNTK(1)TTIQTTDTSNLIE	3	0.90185	1	1	8.93169e-08	88.872	HGEDLNLQNTK(1)TTIQTTDTSNLIE	3	0.88814	2
A0A1S4BF17	294	K	uncharacterized protein LOC107807522 isoform X2	1	LOC107807522	1	0.0288815	59.067	K(1)VHDSPVNK	2	-0.50461	1
A0A1S4AN95	96	K	syntaxin-71-like	2	LOC107799493	1	0.00872912	85.554	VK(1)GLSSEEFAAR	2	0.7836	1								1	0.0139865	60.08	VK(1)GLSSEEFAAR	3	-0.92587	1
A0A1S3Z902	35	K	"calcium-transporting ATPase 9, plasma membrane-type-like"	1	LOC107784252															1	3.27459e-06	126.71	SDADATEPNLIEGK(1)R	2	0.76803	2
A0A1S3XTB8	560	K	heat shock cognate 70 kDa protein 2-like	1	LOC107768506								1	0.0180831	81.709	NTIK(1)DEK(1)IGSK	3	0.78933	1
A0A1S3ZBT5	27	K	26S protease regulatory subunit S10B homolog B-like	3	LOC107785094	1	0.00768464	155.26	LLQHK(1)ELNAR	2	-0.57483	1	1	0.000598307	123.62	LLQHK(1)ELNAR	2	-0.098795	2	1	1.55205e-06	145.28	LLQHK(1)ELNAR	2	0.51787	1
A0A1S3ZZZ5	97	K	uncharacterized protein LOC107792235	1	LOC107792235	0.999123	0.0314636	96.034	EK(0.999)AK(0.001)EAPK	2	0.090605	1
A0A1S3Y0M6	46	K	Protein transport protein SEC23	1	LOC107770941	1	0.0346703	47.062	DLHK(1)DAAPFFK	3	-0.065287	1
A0A1S4A301	957	K	probable disease resistance protein At1g58602	2	LOC107793173								1	0.0164909	43.216	MLLSGQIFGGLLQTIYPSTVPK(1)EWK	3	0.056263	1	1	0.00773111	46.569	MLLSGQIFGGLLQTIYPSTVPK(1)EWK	3	-0.083657	3
A0A1S4D1H7	10	K	probable ubiquitin-conjugating enzyme E2 18	1	LOC107824880	0.999981	0.00794519	104.42	K(1)TLSKIACNR	3	-0.75431	1
A0A1S4D8H9	63	K	uncharacterized protein LOC107827154	1	LOC107827154								0.99997	0.0304437	66.056	YLK(1)DLIMKNK	2	-4.2174	1
A0A1S4D1H7	22	K	probable ubiquitin-conjugating enzyme E2 18	1	LOC107824880								1	0.000406501	85.046	LQK(1)ELVEWQVNPPSGFK	3	-0.60264	2
A0A1S3YG92	214	K	"phosphatidate cytidylyltransferase, mitochondrial-like isoform X2"	1	LOC107775861								1	0.0248032	52.5	MYK(1)SSLEEYAAK(1)NLLR	3	-2.5841	1
A0A1S4AV41	46	K	uncharacterized protein LOC107801692	1	LOC107801692	1	0.0334003	42.336	TTIGMNMLK(1)K(1)R	3	1.7593	1
A0A1S3YL49	2031	K	protein CHROMATIN REMODELING 4	1	LOC107777459															1	0.0300013	71.888	FDLK(1)K(1)ENDIGASR	2	-0.02356	1
A0A1S4AQ81	40	K	remorin-like	2	LOC107800107	1	0.0303569	53.958	EVADEK(1)AIVAPALPPPEQVK	2	-0.52417	1								1	2.83288e-09	104.68	EVADEK(1)AIVAPALPPPEQVK	3	0.28469	5
A0A1S4BDA7	250	K	"2-Cys peroxiredoxin BAS1, chloroplastic"	1	LOC107807034															1	0.000632089	60.472	TLQALQYVQDNPDEVCPAGWK(1)PGEK	3	-0.014568	1
Q8H0G7	6	K	Histone H2A	2	A34								1	0.00329676	92.538	MEAATK(1)TTK	2	-0.53338	1	1	0.00579145	81.771	MEAATK(1)TTK	2	-0.78198	1
A0A1S4DI23	409	K	"glycine--tRNA ligase, chloroplastic/mitochondrial 2-like"	1	LOC107830076								1	0.0156781	70.412	ELLIMVMQK(1)HQR	3	-0.3532	1
A0A075F2H4	96	K	Ubiquitin-conjugating enzyme E2 36-like protein	3	Ubc13-2	1	2.10806e-09	178.84	DK(1)WSPALQIR	2	-0.017277	5	1	6.82466e-09	125.97	DK(1)WSPALQIR	2	-0.8327	6	1	1.03724e-08	142	DK(1)WSPALQIR	3	-0.26651	7
A0A1S4CQ40	354	K	Fructose-bisphosphate aldolase	1	LOC107821177	1	0.000659184	71.969	YAGATNLSEGASESLHVK(1)DYK	4	0.063466	1
A0A1S3X9M6	541	K	protein decapping 5-like isoform X2	1	LOC107762738	1	0.0358512	44.968	K(1)IDVETFGDFSR	3	-0.69271	1
A0A1S3YBR4	56	K	proteasome subunit beta type-1-like isoform X2	3	LOC107774588	1	0.0045298	111.95	ALQK(1)VLAAR	2	-0.75256	1	1	0.0276107	84.743	ALQK(1)VLAAR	2	-0.47296	1	1	0.0110285	113.26	ALQK(1)VLAAR	2	-0.16413	1
A0A1S3Z3S4	3	K	uncharacterized protein LOC107782676	1	LOC107782676								1	0.0169872	66.568	MDK(1)LQWGNR	2	0.17316	1
A0A1S4AV72	279	K	coatomer subunit alpha-1	1	LOC107801629	1	0.0165393	94.006	VWDATK(1)R	2	0.9042	1
A0A1S3Y0T4	618	K	elongation factor 2	1	LOC107770769	1	3.49893e-05	120.84	SK(1)ILSEEFGWDK	3	-0.13143	7
A0A1S3Z4T7	26	K	dynamin-related protein 5A-like	1	LOC107782971								1	0.0279051	54.812	HHK(1)QHASDSGSEFTDR	3	0.011076	2
A0A1S4ATE6	4	K	40S ribosomal protein S24	1	LOC107801095															1	0.010156	78.516	ADK(1)AVTIR	2	-0.53013	1
Q852P7	11	K	Nitrate transporter	1	NtNRT1.1-t								1	0.00344959	58.693	ALPETQQDTK(1)TLPDAWDYK	3	0.65071	2
A0A1S3XRR9	195	K	cytochrome P450 98A2-like	1	LOC107767804															1	0.00125205	89.911	FMNSK(1)GEIDEQGQEFK	3	-1.6052	1
A0A1S4A9L6	314	K	UDP-galactose transporter 2-like	1	LOC107795250								1	0.0140614	54.393	SPHAAK(1)NSLTEEELR	3	0.53828	1
A0A1S4AXD3	24	K	Histone H2B	3	LOC107802329	1	0.00125168	145.09	TPVAEK(1)APAEK	2	0.83458	1	1	9.11824e-05	124.38	TPVAEK(1)APAEK	2	0.089705	1	1	1.24843e-07	147.62	TPVAEK(1)APAEK	2	0.73555	1
A0A1S4AXA9	23	K	kinesin-4-like	1	LOC107802308															0.99863	0.00210749	91.307	QLMEDVGSNIEVK(0.001)K(0.999)K	2	-4.3488	1
A0A1S3ZDB8	364	K	S-adenosylmethionine synthase	1	LOC107785513								1	0.00456642	75.229	YQK(1)TAAYGHFGR	4	1.213	3
A0A1S4BQ99	54	K	"alpha-1,4-glucan-protein synthase [UDP-forming] 2"	3	LOC107810758	1	3.29349e-09	165.78	IIK(1)VPEGFDYELYNR	3	0.57014	2	1	3.67088e-39	172.85	IIK(1)VPEGFDYELYNR	2	-0.34872	4	1	5.97257e-11	141.59	IIK(1)VPEGFDYELYNR	3	-0.42802	3
A0A1S4BRI6	266	K	cyclin-D4-1-like	1	LOC107811128								1	0.0248557	57.347	K(1)MPFFFIHLDK	3	-0.38179	1
A0A1S3YHG4	16	K	uncharacterized protein DDB_G0286299-like	1	LOC107776082	0.999814	0.0176869	55.189	TSQTPSK(0.938)TK(0.062)SSSK(1)PASK(1)SK	3	-4.3704	1
A0A1S4A5D4	77	K	"short-chain dehydrogenase TIC 32, chloroplastic-like"	1	LOC107793887															0.983177	0.0160327	85.161	ILK(0.983)DNK(0.017)AAR	3	0.097594	1
A0A1S4B1K7	650	K	5-oxoprolinase-like	3	LOC107803589	1	0.012468	64.82	GVGVTNILK(1)PR	3	-0.30511	1	1	0.0222285	57.532	GVGVTNILK(1)PR	3	-0.33953	1	1	0.00604906	71.03	GVGVTNILK(1)PR	3	-0.10882	1
A0A1S3Y0T4	471	K	elongation factor 2	1	LOC107770769	1	0.00316046	67.646	NATLTNEK(1)EVEAHPIR	4	-0.69884	3
A0A1S4BXB1	410	K	protein DA1-related 2-like isoform X2	2	LOC107812764								1	1.79963e-08	96.848	NMPSTSTSSSSSTWSSSK(1)K(1)GGK	3	0.70758	1	1	0.000965406	71.651	NMPSTSTSSSSSTWSSSK(1)K(1)GGK	3	0.4134	1
A0A1S4ALZ4	138	K	high mobility group B protein 6-like isoform X2	1	LOC107799076								1	0.0298491	76.282	EQEK(1)LQIELK	2	1.1231	1
A0A1S4BWK5	255	K	NADP-dependent glyceraldehyde-3-phosphate dehydrogenase-like	1	LOC107812643	1	0.00674668	70.889	K(1)AGMIPLQMELGGK	3	-0.70788	1
A0A1S3Y9M0	65	K	Diacylglycerol kinase	3	LOC107773804	1	0.00210931	123.21	DVDAETVK(1)R	2	0.063257	1	1	0.0026925	120.99	DVDAETVK(1)R	2	-0.61665	1	1	0.0104031	102.07	DVDAETVK(1)R	2	-1.4646	1
P68173	435	K	Adenosylhomocysteinase	1	SAHH	1	0.0159577	94.262	K(1)VYVLPK	2	-0.32197	1
A0A1S4CKG9	49	K	syntaxin-51-like isoform X2	1	LOC107819861	1	0.0296467	83.647	K(1)ITILGTR	2	-0.9406	1
A0A1S4ANF6	493	K	root phototropism protein 2-like	2	LOC107799631	1	0.0120841	56.039	NQLQADVSLVK(1)ENEALR	3	0.42335	1	1	0.00120113	69.331	NQLQADVSLVK(1)ENEALR	3	0.020652	2
A0A1S3X787	240	K	uncharacterized protein LOC107761960	1	LOC107761960								1	0.00336409	69.229	VEAIEK(1)LLPPTSIK	3	0.044291	1
Q75ZD4	248	K	14-3-3 i-1 protein	3	14-3-3	1	5.40767e-06	89.043	DNLTLWTSDNAEDAGDDIK(1)EAPK	3	-0.52499	2	1	1.48351e-12	106.74	DNLTLWTSDNAEDAGDDIK(1)EAPK	3	-0.19012	2	1	2.58106e-14	106.69	DNLTLWTSDNAEDAGDDIK(1)EAPK	3	-0.18593	2
A0A1S4DA91	163	K	translationally-controlled tumor protein homolog	3	LOC107827662	1	0.000649395	76.068	DGATDPTFLYLAHGLK(1)EVK	3	0.96367	1	1	7.87971e-07	95.205	DGATDPTFLYLAHGLK(1)EVK	3	-0.50283	3	1	0.00400967	71.263	DGATDPTFLYLAHGLK(1)EVK	4	-0.19202	1
A0A1S4CQ71	63	K	actin-like	1	LOC107821481								1	9.68559e-14	145.23	HTGVMVGMGQK(1)DAYVGDEAQSK(1)R	4	-1.4519	3
A0A1S3YAA7	159	K	NEDD8-conjugating enzyme Ubc12	1	LOC107774225															1	0.0144338	60.691	DNPK(1)LFESNVR	3	3.0861	1
A0A1S3Y0V1	211	K	S-adenosylmethionine synthase	3	LOC107770931	1	7.58993e-05	123.68	DLK(1)EHVIKPVIPEK	3	0.29432	3	0.999758	0.000420767	107.69	DLK(1)EHVIKPVIPEK	3	-0.17811	2	0.999909	0.000224717	112.62	DLK(1)EHVIKPVIPEK	2	-0.29732	3
A0A1S3YNM7	64	K	ubiquitin-conjugating enzyme E2 variant 1C isoform X2	1	LOC107778179															0.984423	0.0228199	59.75	LFCDK(0.984)DYPEK(0.016)PPSVR	4	2.8372	1
A0A1S3Z1R7	268	K	pentatricopeptide repeat-containing protein At2g37230-like	1	LOC107782030								0.998249	0.0233809	72.928	AK(0.002)K(0.998)IEEAEK	2	-3.4611	2
Q68GS0	135	K	SKP1	1	SKP1	1	7.72813e-07	111.34	TFNIK(1)NDFTPEEEEEVRR	3	0.11328	4
A0A1S4B4X0	78	K	uncharacterized protein LOC107804571	1	LOC107804571															0.993322	0.0182762	74.962	NIEK(0.993)PSEPSK(0.007)EK	2	0.020928	1
A0A1S3ZUI8	326	K	heat shock cognate protein 80-like	1	LOC107790625								1	0.00190395	111.52	RAPFDLFDTK(1)K	3	0.2351	2
P68173	186	K	Adenosylhomocysteinase	3	SAHH	1	0.00582353	107.79	ESLK(1)TDPLK	2	-0.78494	2	1	0.0114179	97.965	ESLK(1)TDPLK	3	-0.46462	3	1	0.0138462	105.2	ESLK(1)TDPLK	2	-0.26606	1
A0A1S3XKQ6	32	K	"lysine--tRNA ligase, cytoplasmic-like"	1	LOC107766273	0.999894	0.0325133	46.461	K(0.003)GK(0.077)SENK(0.921)PSTQSQK(1)HVAAGDK	3	1.7979	1
A0A1S3ZP97	18	K	sugar transporter ERD6-like 6	1	LOC107788868								1	0.0191805	61.213	K(1)PFLHTGSWYR	3	-0.11296	1
A0A1S3Y9Q5	67	K	probable inactive histone-lysine N-methyltransferase SUVR2 isoform X1	2	LOC107773846								1	1.9701e-06	88.945	K(1)SSENPEQEELVQDEPEPPLKR	4	-0.35228	1	1	0.000498796	76.78	K(1)SSENPEQEELVQDEPEPPLKR	4	0.24523	1
A0A1S4BXY1	548	K	receptor-like protein kinase FERONIA	3	LOC107813068	1	0.00330787	84.821	VYK(1)GEIDGGTK	3	0.28528	2	1	0.00325854	91.961	VYK(1)GEIDGGTK	3	0.25679	2	1	0.00718665	95.094	VYK(1)GEIDGGTK	3	0.67603	2
A0A1S4D0S8	58	K	remorin-like	2	LOC107824746	1	0.00772559	72.315	EK(1)SDDSK(1)ALVVVEDK	3	1.8769	2								1	0.0147096	61.265	EK(1)SDDSK(1)ALVVVEDK	3	1.432	1
A0A1S4BQK5	1234	K	ABC transporter C family member 14-like isoform X2	1	LOC107810856															1	0.00527533	83.862	GDIDINNLK(1)VR	3	0.5231	1
A0A1S3XPU6	124	K	uncharacterized protein LOC107767401	3	LOC107767401	1	0.0253223	50.791	LNEAMQEVIK(1)K	3	-0.19124	1	1	0.0162804	63.694	LNEAMQEVIK(1)K	3	-0.61891	1	1	0.0100859	71.221	LNEAMQEVIK(1)K	3	-0.92055	1
A0A1S4D0R7	196	K	patellin-6-like	1	LOC107824574															1	0.00226558	57.188	GIDQLHFK(1)PGGINSIIQVTDLK	4	-0.22965	1
A0A1S3YMX4	557	K	"histone-lysine N-methyltransferase, H3 lysine-9 specific SUVH1-like"	1	LOC107777978															0.838637	0.00299622	64.04	MSQTGPKARVEVFK(0.161)TK(0.839)NR	2	-0.091677	1
A0A1S3XPD7	147	K	vesicle-associated membrane protein 711-like isoform X2	1	LOC107767297															1	0.00335097	86.803	NVMIENIDK(1)VLER	3	1.611	1
A0A1S4B8V7	36	K	V-type proton ATPase subunit B2-like	3	LOC107805728	1	3.88702e-05	101.2	TVSGVAGPLVILDK(1)VK	2	-0.76412	5	1	4.54592e-05	98.421	TVSGVAGPLVILDK(1)VK	3	-0.029159	5	1	5.96473e-05	94.487	TVSGVAGPLVILDK(1)VK	3	-0.28249	4
A0A1S4B8V7	439	K	V-type proton ATPase subunit B2-like	3	LOC107805728	1	0.0274043	49.28	K(1)FVAQGAYDTR	3	-0.03558	1	1	0.00658435	85.924	K(1)FVAQGAYDTR	3	1.1305	2	1	0.00255021	93.839	K(1)FVAQGAYDTR	3	0.78484	1
A0A1S4DFF8	65	K	uncharacterized protein LOC107829141	3	LOC107829141	1	0.000208009	116.03	LLTQDTFHEVK(1)SK	2	-2.2102	2	1	0.000441904	103.46	LLTQDTFHEVK(1)SK	2	-2.3619	5	1	2.43971e-08	136.38	LLTQDTFHEVK(1)SK	2	-1.3617	5
A0A1S3YUB5	205	K	E3 ubiquitin-protein ligase RING1-like	3	LOC107779647	1	3.04764e-06	103.88	YGAPPAAK(1)SAVAGLPDIK	2	0.36479	2	1	0.00055412	85.362	YGAPPAAK(1)SAVAGLPDIK	2	0.40096	3	1	0.00016866	87.088	YGAPPAAK(1)SAVAGLPDIK	2	0.35204	3
A0A1S4BV78	95	K	LEAF RUST 10 DISEASE-RESISTANCE LOCUS RECEPTOR-LIKE PROTEIN KINASE-like 1.1 isoform X2	1	LOC107812233															1	0.0344769	67.207	LRDGK(1)EVAVK	3	0.23416	1
A0A1S4BQ72	43	K	uncharacterized protein LOC107810719	1	LOC107810719								1	0.0243991	75.043	K(1)PTVK(1)QVK	2	0.80751	1
A0A1S3XFX9	13	K	plasma membrane-associated cation-binding protein 1-like	1	LOC107764656	1	0.0127924	122.74	IK(1)QIFDK	2	0.44758	1
A0A1S4D817	68	K	acyl-CoA-binding protein-like	3	LOC107826954	1	0.00612632	70.628	SK(1)DEAMNDYITK	3	-0.97656	1	1	0.00268405	83.243	SK(1)DEAMNDYITK	3	-0.049501	2	1	0.000734628	122.66	SK(1)DEAMNDYITK	2	0.022444	4
A0A1S4AQ81	164	K	remorin-like	1	LOC107800107															1	0.012091	98.407	IALLHK(1)EAEEK	2	-0.63425	2
A0A1S4DRA5	163	K	GEM-like protein 1	2	LOC107832608								1	0.0306503	44.045	IAQGTK(1)VLAEGGYEK	3	0.72733	1	1	0.00863895	59.634	IAQGTK(1)VLAEGGYEK	3	0.76951	1
A0A1S4BAT9	114	K	glutamate--glyoxylate aminotransferase 2	3	LOC107806358	1	0.00587158	84.198	K(1)EVAEFIER	2	0.3926	1	1	0.0287714	72.848	K(1)EVAEFIER	3	-0.1779	2	1	0.0226475	82.261	K(1)EVAEFIER	2	-0.44193	2
A0A1S4BQ99	116	K	"alpha-1,4-glucan-protein synthase [UDP-forming] 2"	3	LOC107810758	1	0.0163951	77.24	DPSGK(1)DINALEQHIK	3	0.74151	1	1	0.00622203	77.24	DPSGK(1)DINALEQHIK	3	-0.9029	1	1	0.00686985	73.833	DPSGK(1)DINALEQHIK	3	1.3368	1
Q947K7	84	K	14-3-3 g-1 protein	1	14-3-3								1	0.0181924	69.65	K(1)NEEHVSLVK	3	-0.10781	1
P32026	61	K	Defensin-like protein	2	FST								1	0.00409166	81.017	FTDGHCSK(1)LLR	3	-1.7517	1	1	0.00297405	81.017	FTDGHCSK(1)LLR	3	-1.5647	2
A0A1S3X7W0	336	K	xanthine dehydrogenase 1-like isoform X2	3	LOC107762161	1	0.0168279	62.582	IIDCK(1)GNVR	3	-1.0613	1	1	0.0339147	77.318	IIDCK(1)GNVR	2	0.46403	1	1	0.0300894	49.715	IIDCK(1)GNVR	3	-0.67814	1
A0A1S4B1Q0	67	K	uncharacterized protein LOC107803615	2	LOC107803615	1	0.0315704	60.641	SSSK(1)VVNLEK	2	0.70633	1	1	0.0259139	69.672	SSSK(1)VVNLEK	2	1.357	1
A0A1S4AGN4	290	K	"GDP-mannose 3,5-epimerase 1-like"	1	LOC107797479								1	0.00556064	62.732	K(1)LPVHHIPGPEGVR	4	-0.84614	1
A0A1S4ALM3	6	K	ubiquitin-40S ribosomal protein S27a-like	1	LOC107799069	1	1.39203e-06	181.4	MQIFVK(1)TLTGK	2	-0.68875	14
A0A1S4D975	254	K	elongation factor 1-gamma 2-like isoform X2	1	LOC107827359	1	0.00467631	110.84	FEEEEEAPK(1)PK	2	-0.27267	2
A0A1S3XWG5	480	K	Glycosyltransferases	1	LOC107769571								1	0.026401	64.73	SRK(1)HSSRSK(1)R	3	-2.1684	1
A0A1S3ZZL0	61	K	enolase-like	3	LOC107792078	1	0.00975154	79.614	DGGSEYLGK(1)GVSK	2	-0.58013	1	1	0.00410577	75.102	DGGSEYLGK(1)GVSK	3	-0.28531	2	1	0.00286764	105.19	DGGSEYLGK(1)GVSK	2	-1.2075	1
A0A1S4AQ81	108	K	remorin-like	1	LOC107800107															1	0.0201508	101.46	AWEESEK(1)SK	2	1.452	2
A0A1S3ZNI9	202	K	cellulose synthase-like protein G2	1	LOC107788647								1	0.0281997	67.207	EYEDFK(1)ERLR	3	2.2531	5
Q9FSF0	311	K	Malate dehydrogenase	3	MD1	0.982426	6.94692e-17	193.77	K(0.982)K(0.018)LDATAEELSEEK	2	0.11005	3	0.994367	5.49774e-22	156.96	K(0.994)K(0.006)LDATAEELSEEK	2	0.06874	3	0.99746	2.62483e-14	209.22	K(0.997)K(0.003)LDATAEELSEEK	3	-0.26419	4
Q06BK4	15	K	Water channel protein	3	LOC107778528	1	0.0033642	109.7	LGANK(1)FR	2	0.95239	5	1	1.08717e-05	112.17	AENKEEDVK(1)LGANK(1)FR	3	-0.34481	1	1	5.69664e-05	101.04	AENKEEDVK(1)LGANK(1)FR	3	0.10161	1
A0A1S3ZU75	353	K	E3 ubiquitin-protein ligase RGLG2-like	3	LOC107790476	1	7.29786e-06	72.99	YGAASFGTSK(1)PSQSNSYRPSAPSSTSR	3	0.49922	3	1	0.00013136	70.699	YGAASFGTSK(1)PSQSNSYRPSAPSSTSR	3	0.3122	2	1	1.84257e-05	69.98	YGAASFGTSK(1)PSQSNSYRPSAPSSTSR	3	0.18789	3
A0A1S4D1U6	115	K	60S ribosomal protein L28-1-like	3	LOC107824985	1	0.00108911	90.498	AVTNQVADNYYRPDLK(1)K	4	0.077346	3	1	1.77207e-11	128.71	AVTNQVADNYYRPDLK(1)K	4	-0.67371	4	1	8.04513e-13	131.61	AVTNQVADNYYRPDLK(1)K	4	-1.0533	4
A0A1S3Z9R5	183	K	telomere repeat-binding factor 1-like isoform X2	1	LOC107784527	0.99901	0.0200768	61.679	LIK(0.028)MK(0.973)RK(0.999)YK	2	2.342	1
A0A1S4D5M3	286	K	Terpene cyclase/mutase family member	3	LOC107826198	1	0.00202773	74.966	K(1)ELFTVPYHEIDWNK	3	-0.37237	3	1	0.000204305	99.238	K(1)ELFTVPYHEIDWNK	4	-0.25938	3	1	0.00345365	66.568	K(1)ELFTVPYHEIDWNK	4	0.26658	1
A0A1S4CGG7	159	K	"glutaredoxin-C5, chloroplastic-like isoform X1"	1	LOC107818547															1	0.00846162	73.36	HIGGCTDTIK(1)LYR	3	3.5805	1
A0A1S4AQF4	54	K	uncharacterized protein LOC107800282	1	LOC107800282	0.999292	0.0265569	55.899	PK(0.999)ASYSFK(0.003)MDDK(0.998)RK	3	-1.4474	1
Q9FES7	379	K	Mg-protoporphyrin IX chelatase	1	Su-s								1	0.0208315	102.77	ALAALK(1)GR	2	-0.15376	1
A0A1S4DG44	213	K	uncharacterized protein LOC107829270	1	LOC107829270								1	0.029551	45.908	PRK(1)GK(1)LCSK(1)TR	3	3.452	1
A0A1S3XHL0	33	K	40S ribosomal protein S20-2	3	LOC107765328	1	0.00938553	77.204	ITLSSK(1)NVK(1)NLEK	3	-0.49856	1	1	0.0068655	88.224	ITLSSK(1)NVK(1)NLEK	3	1.0415	1	1	0.0230908	61.167	ITLSSK(1)NVK(1)NLEK	3	0.7315	1
A0A1S4ARC4	435	K	Serine hydroxymethyltransferase	2	LOC107800464	1	0.0329828	48.981	DFNK(1)GLVNNK	2	-1.4778	1	1	0.0298332	49.418	DFNK(1)GLVNNK	3	-0.95504	1
A0A1S3Z556	412	K	DNA helicase	1	LOC107783151								1	0.0152249	44.184	TAPVAVYTSGK(1)GSSAAGLTASVIR	3	0.40788	1
A0A1S3XJF8	126	K	NAC domain-containing protein 72-like	1	LOC107765862															0.56836	0.0181785	41.292	APK(0.568)GTK(0.432)TNWIMHEYRLFEPSRK	4	3.4482	1
A0A1S4CLU4	313	K	metacaspase-3-like	3	LOC107820452	1	3.51027e-05	171.26	TLEQETK(1)LTYGR	3	-0.28902	3	1	1.1599e-25	164.81	TLEQETK(1)LTYGR	2	-0.77163	1	1	8.51702e-08	145.81	TLEQETK(1)LTYGR	3	0.72974	3
A0A1S4A5Q7	815	K	serine/threonine-protein kinase EDR1-like isoform X3	1	LOC107793969	1	0.0258259	62.546	K(1)CWQTDPK	2	3.8519	1
A0A1S4A451	75	K	60S ribosomal protein L36	1	LOC107793582	0.999996	0.0270115	60.102	DKRALK(1)VAK(1)R	3	-0.044798	1
A0A1S4CTV2	482	K	(-)-germacrene D synthase-like	1	LOC107822502	1	0.0141226	56.551	K(1)ILESK(1)WK(1)DLNR	3	0.12477	2
A0A1S4CFD8	7	K	rhodanese-like domain-containing protein 6	1	LOC107818366															1	0.0286003	50.025	ANQEPK(1)K	2	3.7916	1
P27493	37	K	"Chlorophyll a-b binding protein 21, chloroplastic"	1	CAB21								0.890824	0.000179411	90.755	K(0.891)TVAK(0.109)PVASSSPWYGPDR	3	-0.12173	1
A0A1S4DK72	37	K	peroxiredoxin-2B-like	2	LOC107830577								1	0.00058658	75.682	K(1)VILFAVPGAFTPTCSTK	3	-0.071706	1	1	0.0103683	56.424	K(1)VILFAVPGAFTPTCSTK	3	-0.58742	1
A0A1S4AKW3	175	K	"ribulose bisphosphate carboxylase/oxygenase activase 2, chloroplastic-like"	3	LOC107798764	1	8.11298e-06	136.01	GQGK(1)SFQCELVFR	2	-0.1875	3	1	2.64352e-15	143.31	GQGK(1)SFQCELVFR	3	0.1921	3	1	8.15503e-06	158.34	GQGK(1)SFQCELVFR	2	0.33024	5
A0A076L1Z5	106	K	Remorin 2	3	LOC107810092	1	1.13684e-36	175.93	K(1)LEEQLEEK	3	0.69486	2	1	1.42143e-26	171.33	K(1)LEEQLEEK	3	0.88515	2	1	0.0118935	83.499	K(1)LEEQLEEK	3	1.4977	1
A0A1S3Y893	326	K	uncharacterized protein LOC107773637	1	LOC107773637															1	0.0256905	64.224	K(1)DMIRNEVIRDK	3	-0.7245	1
A0A1S4A347	128	K	HVA22-like protein	3	LOC107793218	0.99971	0.00516487	88.283	K(0.5)K(0.5)DVFSK(1)PDDILTAAEK	3	0.12617	1	0.999346	0.00127937	88.637	K(0.5)K(0.5)DVFSK(0.999)PDDILTAAEK	3	-0.093133	3	0.999797	0.0057716	70.555	K(0.5)K(0.5)DVFSK(1)PDDILTAAEK	3	-1.1653	1
A0A1S4C7F4	285	K	staphylococcal-like nuclease CAN2	1	LOC107815927								1	0.0307433	48.277	K(1)GLAWHYTAYDK	3	-1.0906	1
A0A1S3XHW4	874	K	Poly [ADP-ribose] polymerase	1	LOC107765431								0.800079	0.0328818	50.353	K(0.199)AK(0.8)YMDK(0.001)PPK	3	-3.904	1
A0A1S4BAT9	54	K	glutamate--glyoxylate aminotransferase 2	3	LOC107806358	1	3.05943e-15	125.92	KIIFTNVGNPHALGQK(1)PLTFPR	4	-0.60566	2	1	0.000814208	73.675	IIFTNVGNPHALGQK(1)PLTFPR	3	1.0388	3	1	0.00317089	62.167	IIFTNVGNPHALGQK(1)PLTFPR	3	-0.46841	3
A0A1S3YYC7	5	K	protein NRT1/ PTR FAMILY 2.11-like	3	LOC107780780	1	0.000433088	93.766	MEVDK(1)VPARDEPK	2	-0.65757	5	1	0.000687317	93.839	MEVDK(1)VPARDEPK	3	-0.14761	6	1	0.000167672	119.25	MEVDK(1)VPARDEPK	2	-1.1551	3
A0A1S3YRR6	90	K	nascent polypeptide-associated complex subunit alpha-like protein 2	1	LOC107778929								0.999999	7.00133e-05	112.03	TK(1)NVLFFISKPDVFK	3	0.77112	1
A0A1S4CMU4	26	K	abscisic stress-ripening protein 2-like	1	LOC107820579	1	0.00770507	74.783	NKEEEEGPVDYEK(1)EVK	3	0.35534	1
A0A1S4AI31	194	K	uncharacterized protein LOC107797953	2	LOC107797953	1	0.00441656	110.61	K(1)QLEK(1)LR	3	0.13192	1								1	0.00937104	118.69	K(1)QLEK(1)LR	3	0.05735	1
A0A1S3XHL0	70	K	40S ribosomal protein S20-2	3	LOC107765328	1	1.21268e-05	141.34	K(1)SPCGEGTNTWDRFELR	3	0.18291	4	1	5.10012e-16	148.48	K(1)SPCGEGTNTWDR	3	0.068274	2	1	0.0001978	109.15	K(1)SPCGEGTNTWDRFELR	4	-0.090357	3
A0A1S4AXD3	130	K	Histone H2B	3	LOC107802329	1	1.15413e-09	137.17	LVLPGELAK(1)HAVSEGTK	2	0.20229	6	1	1.53935e-21	149.31	LVLPGELAK(1)HAVSEGTK	4	0.081849	5	1	1.24858e-14	132.84	LVLPGELAK(1)HAVSEGTK	2	0.26458	5
A0A1S3Z7F4	39	K	actin-depolymerizing factor 1	2	LOC107783829	1	0.000957182	160.52	IEEK(1)QK(1)QVVVEK	2	0.4162	2								1	4.93273e-08	142.39	IEEK(1)QK(1)QVVVEK	2	-0.668	2
A0A1S4ADW0	900	K	Plasma membrane ATPase	2	LOC107796542								1	3.07916e-12	108.45	TLHGLQPPEATNLFNEK(1)NSYR	4	-0.078258	2	1	0.000201686	77.668	TLHGLQPPEATNLFNEK(1)NSYR	3	-1.4898	3
Q84QE7	92	K	Putative photosystem I subunit III	1	LOC107789388								1	0.0350047	109.01	K(1)LESSLK	2	-0.57427	1
P18212	222	K	"Oxygen-evolving enhancer protein 2-2, chloroplastic"	3	PSBP2	1	5.11049e-09	107.06	TADGNEGGK(1)HQLITATVNDGK	4	0.44326	5	1	6.92247e-12	107.06	TADGNEGGK(1)HQLITATVNDGK	3	-0.44754	4	1	1.88248e-06	88.951	TADGNEGGK(1)HQLITATVNDGK	4	0.3174	6
Q93XP8	115	K	Chalcone synthase	3	LOC107801774	1	0.00862746	83.948	AIK(1)EWGQPK	3	-0.24176	2	1	0.00575708	109.48	AIK(1)EWGQPK	3	-0.43152	2	1	0.00284252	126.24	AIK(1)EWGQPK	3	0.090109	3
Q589Y1	484	K	Glycosyltransferase	1	NtGT5b	1	0.0220669	56.551	VVNDILLSSK(1)H	2	0.15282	1
A0A1S3YXJ6	647	K	long chain acyl-CoA synthetase 1-like	3	LOC107780949	1	1.21387e-07	101.72	HYK(1)VEIDDLYQR	3	0.32086	2	1	0.000565397	106.79	HYK(1)VEIDDLYQR	3	-0.61282	2	1	0.000851649	97.957	HYK(1)VEIDDLYQR	3	0.26676	1
A0A1S4BLI0	168	K	Serine/threonine-protein phosphatase	1	LOC107809565								1	0.00931538	66.674	VTTEFNHINK(1)LDLVCR	3	-0.16279	1
A0A1S3YMX4	397	K	"histone-lysine N-methyltransferase, H3 lysine-9 specific SUVH1-like"	1	LOC107777978								1	0.0154778	62.166	SK(1)LGDCSIFR	3	1.6391	1
A0A1S3ZHQ7	180	K	Proteasome subunit alpha type	3	LOC107786909	1	0.00165281	158.76	LK(1)LSEMTCR	3	-0.065114	2	1	3.62768e-07	136.99	LK(1)LSEMTCR	3	-0.63915	2	1	0.00350373	86.882	LK(1)LSEMTCR	3	0.30759	1
A0A1S3ZMF5	286	K	"fructose-1,6-bisphosphatase, cytosolic-like"	1	LOC107788283	1	0.0190827	64.82	K(1)LYAAEEQN	2	-0.81016	1
A0A1S3ZN42	10	K	nucleobase-ascorbate transporter 6-like	3	LOC107788620	1	9.78773e-06	97.776	AGGGAAPAK(1)SSDDPAPHPTK	3	-0.28851	4	1	3.1994e-09	106.75	AGGGAAPAK(1)SSDDPAPHPTK	3	-0.98322	3	1	0.00017105	79.695	AGGGAAPAK(1)SSDDPAPHPTK	3	0.3566	2
A0A1S4DR69	288	K	AP-2 complex subunit alpha-1-like	2	LOC107832578	1	0.0115053	75.739	ILMGTDVVK(1)NVNK	3	-0.072592	1	1	0.00509862	84.169	ILMGTDVVK(1)NVNK	3	-0.32479	1
A0A1S4C446	58	K	WSC domain-containing protein ARB_07867-like	1	LOC107814915	0.75194	0.00992063	64.313	EFLKHIDGEK(0.752)K(0.233)K(0.015)NK	3	-0.007009	1
A0A1S4A0D0	189	K	DUF21 domain-containing protein At4g14240-like	1	LOC107792320								1	0.00132221	72.898	AQLK(1)ALVSIHGQEAGK	3	-0.22974	1
A0A1S4BDW4	43	K	Non-specific serine/threonine protein kinase	1	LOC107807183	0.765411	0.0320697	48.229	SVAMK(0.765)VVGK(0.288)EK(0.947)VIK	2	4.1464	1
A0A1S4DJE8	85	K	auxin-repressed 12.5 kDa protein-like	1	LOC107830474	1	0.0131296	66.708	SVFHPGSNIATK(1)R	3	0.31043	1
A0A1S4B476	63	K	heavy metal-associated isoprenylated plant protein 26-like	3	LOC107804356	1	0.00166362	87.641	GVSSVTVEPK(1)QHK	2	0.43437	2	1	0.0034944	74.237	GVSSVTVEPK(1)QHK	3	0.30681	2	1	1.41955e-05	119.03	GVSSVTVEPK(1)QHK	2	-0.55915	2
A0A076L1Z5	28	K	Remorin 2	3	LOC107810092	1	0.0176895	54.812	ADDSK(1)ALATVPPPK	3	-0.1193	3	1	0.00169445	82.483	ADDSK(1)ALATVPPPK	2	0.049855	4	1	0.00159627	76.01	ADDSK(1)ALATVPPPK	3	-0.0099314	2
A0A1S4AWB8	488	K	patellin-3-like	2	LOC107802001	1	4.13743e-05	97.081	HTIEFPVTEK(1)CTLVWEAR	3	-1.3153	1	1	0.00122444	67.644	HTIEFPVTEK(1)CTLVWEAR	3	0.47718	1
O04009	348	K	S-adenosylmethionine decarboxylase proenzyme	2	SAMDC	0.996478	0.00860657	59.673	SVLK(0.996)GCWK(0.003)EDEEKEEKE	4	0.602	1								0.949144	0.0169255	50.827	SVLK(0.949)GCWK(0.046)EDEEK(0.005)EEKE	4	1.266	1
A0A1S4BRD0	400	K	5-methyltetrahydropteroyltriglutamate-- homocysteine methyltransferase-like	1	LOC107811094								1	0.00890412	81.185	VTNEAVQK(1)AAAALR	2	1.5476	1
A0A1S4BGN4	123	K	26S proteasome non-ATPase regulatory subunit 4 homolog	1	LOC107808066								1	0.012303	82.426	K(1)VLEMIGR	3	-0.13087	1
A0A1S4C187	61	K	uncharacterized protein At5g48480-like	1	LOC107813997	1	1.50518e-05	118.52	K(1)AEQELPLILSAELK	3	0.19962	1
A0A1S4CU07	84	K	Cysteine proteinase inhibitor	2	LOC107822566								0.989717	0.011663	65.374	VWVK(0.01)PWQNFK(0.99)QVEDFK	4	-0.020537	1	0.999994	1.85278e-06	111.07	VWVKPWQNFK(1)QVEDFK	4	-0.67969	1
A0A1S4CJZ0	417	K	9-divinyl ether synthase-like	3	LOC107819622	1	0.0157313	61.235	LLK(1)YVYWSNAR	3	0.38021	1	1	0.00120846	97.163	LLK(1)YVYWSNAR	3	0.38784	1	1	0.000368775	111.27	LLK(1)YVYWSNAR	3	-2.4867	2
A0A1S3YND6	119	K	putative E3 ubiquitin-protein ligase XBAT35 isoform X2	2	LOC107777805	1	0.0151329	64.654	IK(1)GFSNVVR	3	-1.5485	1	1	0.00921182	72.325	IK(1)GFSNVVR	3	-1.7384	1
A0A1S4BE66	228	K	"fructose-1,6-bisphosphatase, cytosolic"	3	LOC107807379	1	0.000864892	86.944	NWDGPTTK(1)YVQNCK	3	-0.49551	3	1	0.000864488	99.941	NWDGPTTK(1)YVQNCK	2	-0.40577	4	1	0.000804831	105.65	NWDGPTTK(1)YVQNCK	3	-1.454	4
A0A1S3Z584	53	K	uncharacterized protein LOC107783106	2	LOC107783106	1	0.00743539	91.549	NK(1)ETGFVWLK	2	-0.072387	1								1	0.00891967	101.38	NK(1)ETGFVWLK	2	0.38925	1
P27154	728	K	Phosphoenolpyruvate carboxylase	1	PPC	1	0.0340256	51.193	SIVFK(1)EPR	3	0.23077	1
A0A1S4DLK1	109	K	thymocyte nuclear protein 1-like	1	LOC107831082								1	0.0328947	48.115	NEGLK(1)GFGLFR	3	-1.0738	1
A0A1S3Z8U8	38	K	Fructose-bisphosphate aldolase	1	LOC107784214								1	4.23807e-94	209.25	GILAADESTGTIGK(1)R	3	-0.3523	3
A0A1S3ZBV2	35	K	ubiquitin receptor RAD23c-like	2	LOC107785012								1	0.000166899	69.071	NIESVQGQDVYPAAQQMLIHQGK(1)VLK	4	-0.93023	1	1	2.47047e-22	119.16	NIESVQGQDVYPAAQQMLIHQGK(1)VLK	4	0.13125	2
P18212	239	K	"Oxygen-evolving enhancer protein 2-2, chloroplastic"	3	PSBP2	0.999778	0.00880228	91.313	LYICK(1)AQAGDKR	3	0.15714	1	0.995991	0.00321948	97.452	LYICK(0.996)AQAGDK(0.004)R	3	0.34124	2	0.999992	0.00736544	92.247	LYICK(1)AQAGDKR	4	0.72083	2
A0A1S4BXY1	556	K	receptor-like protein kinase FERONIA	2	LOC107813068	1	0.0042063	77.124	GEIDGGTK(1)VAIK	3	-1.4102	1								1	0.0320889	61.235	GEIDGGTK(1)VAIK	3	0.30509	1
A0A1S4CY82	72	K	temperature-induced lipocalin-1-like	1	LOC107823890								1	0.0105116	82.202	GSIEGTAYK(1)ADPK	2	1.0344	1
A0A1S4DR26	8	K	E3 ubiquitin-protein ligase CHIP-like	1	LOC107832521															1	0.000614778	97.779	SPIVGSK(1)QAEQLK	3	0.099945	2
A0A1S4D3F6	720	K	Aconitate hydratase	3	LOC107825601	1	0.000349587	74.742	STYEAITK(1)GNTMWNELSVPTAK	3	-0.052185	1	1	0.00400669	53.96	STYEAITK(1)GNTMWNELSVPTAK	3	0.16566	1	1	0.00712689	51.431	STYEAITK(1)GNTMWNELSVPTAK	3	-0.22479	1
A0A1S4ABN8	644	K	long chain acyl-CoA synthetase 4-like	2	LOC107795838								1	0.000529043	102.07	RPQLLK(1)YYK	3	-0.28509	4	0.999999	0.00100716	133.13	KRPQLLK(1)YYK	3	-0.29316	3
A0A1S4BTC6	389	K	OTU domain-containing protein 5-B-like	2	LOC107811581	0.999884	0.000212487	169.09	NVDKDQVK(1)AAIK	2	1.0965	3								1	0.00218913	179.6	NVDKDQVK(1)AAIK	2	0.27798	4
A0A1S4BMV6	584	K	glycine-rich domain-containing protein 1-like	1	LOC107809983	1	0.0209007	58.23	NVK(1)FFPGQK	3	-1.485	1
A0A1S3ZHK1	152	K	uncharacterized protein LOC107786924	2	LOC107786924	1	0.00710268	72.434	EFQSISLK(1)TEK	3	-1.9123	1	1	0.00349897	84.507	EFQSISLK(1)TEK	3	-2.0419	1
A0A1S3Z2W0	98	K	NEDD8-conjugating enzyme Ubc12-like	1	LOC107782392								1	0.0278406	53.013	DNPK(1)LFESNVR	3	-0.76292	1
P93769	438	K	Elongation factor 1-alpha	1	tel1															1	0.0272714	59.975	DPTGAK(1)VTK(1)AAQK	3	0.26926	1
A0A1S4CQ71	115	K	actin-like	1	LOC107821481								1	1.99165e-10	102.59	VAPEEHPVLLTEAPLNPK(1)ANR	3	-0.53778	2
A0A1S4AVA2	26	K	copper transport protein ATX1-like isoform X2	2	LOC107801743								1	0.0154635	52.019	VLGK(1)MEGVESYDIDIK	3	-0.5078	1	1	0.00107221	75.998	VLGK(1)MEGVESYDIDIK	3	0.36042	1
A0A0A7AF85	215	K	Carotenoid cleavage dioxygenase 1-1	3	CCD1-1	1	0.000373466	84.94	VLEDGDLQTLGMLDYDK(1)R	2	-1.3246	3	1	2.49413e-06	100.39	VLEDGDLQTLGMLDYDK(1)R	3	-1.8994	4	1	1.39834e-12	147.53	VLEDGDLQTLGMLDYDK(1)R	2	0.32878	4
Q40471	76	K	Eukaryotic initiation factor 4A-9	1																1	1.59986e-05	85.177	GIVPFCK(1)GLDVIQQAQSGTGK	3	0.11851	1
A0A1S4C0C1	48	K	ubiquitin-40S ribosomal protein S27a-like	1	LOC107813709								1	6.38185e-67	176.42	LIFAGK(1)QLEDGR	2	-3.0441	227
A0A1S4A077	399	K	uncharacterized protein LOC107792307 isoform X2	1	LOC107792307	1	0.0349924	49.3	GAK(1)K(1)NAMEDDK	3	-0.92103	1
A0A1S3YRB7	95	K	PHD finger-like domain-containing protein 5B	2	LOC107778796								1	0.00620377	77.42	IVNLGSAK(1)TDLFYER	3	0.32476	1	1	0.000587771	87.824	IVNLGSAK(1)TDLFYER	3	-0.056396	1
A0A1S4CKG9	91	K	syntaxin-51-like isoform X2	2	LOC107819861	1	0.000421649	85.087	SK(1)VTQMASTLNMSSFANR	3	0.28706	1								1	0.000147728	83.393	SK(1)VTQMASTLNMSSFANR	3	-0.22427	1
A0A1S3XJC8	45	K	40S ribosomal protein S3a	1	LOC107765835								1	0.0197034	59.908	NVGK(1)TLVTR	3	0.1477	1
A0A1S4CE38	53	K	ubiquitin domain-containing protein 1-like	3	LOC107818068	1	5.66114e-23	202.18	EEFWDTAPHYGGK(1)K	2	-0.8649	2	1	1.54872e-76	201.38	EEFWDTAPHYGGK(1)K	2	-0.81852	3	1	2.16837e-10	205.31	EEFWDTAPHYGGK(1)K	2	-0.32888	6
I2G7N7	26	K	TIP protein	1	TIP															0.999998	0.0140386	63.894	NKEEEEGPVDYEK(1)EVK	3	-0.32052	1
Q1W375	212	K	Phosphomannomutase	2									1	0.0018477	70.197	TYK(1)GGNDHEIYESER	3	-1.0003	1	1	0.0078034	60.489	TYK(1)GGNDHEIYESER	3	0.11483	1
A0A1S3ZA42	585	K	FK506-binding protein 5-like isoform X2	1	LOC107784592								0.510107	0.00803913	69.456	VK(0.034)QSLVK(0.945)AK(0.51)K(0.51)AIIGK	2	-1.2057	1
A0A1S3WZX1	92	K	elongation factor 1-beta-like	3	LOC107759618	1	5.99213e-07	107.69	IGSQAAPAEAAPAK(1)EAAK	3	-0.037058	1	1	0.00205635	64.298	IGSQAAPAEAAPAK(1)EAAK	3	-0.55769	1	1	4.58859e-07	101.53	IGSQAAPAEAAPAK(1)EAAK	3	0.27205	1
A0A1S3ZN92	242	K	DNA damage-inducible protein 1	3	LOC107788650	1	0.000422634	84.046	YK(1)GIAHGVGQSEILGR	3	0.40523	3	1	1.26069e-05	103.66	YK(1)GIAHGVGQSEILGR	3	-0.93438	2	1	0.00240984	66.246	YK(1)GIAHGVGQSEILGR	4	-1.0959	3
A0A1S3Y3Z1	55	K	Thioredoxin	3	LOC107771931	1	0.0106233	68.371	K(1)IPTVTFLK	3	-0.71462	2	1	0.0352493	48.091	K(1)IPTVTFLK	3	-0.54736	1	1	0.0153664	68.846	K(1)IPTVTFLK	3	-0.048315	2
A0A1S4C9Q1	57	K	probable calcium-binding protein CML13	1	LOC107816741								1	0.0199417	60.489	SIIAEEK(1)LTAPFDFNR	3	-1.0032	1
A0A1S4B4M6	897	K	26S proteasome non-ATPase regulatory subunit 1 homolog	2	LOC107804491								1	0.0163204	63.614	K(1)NEPEPSFEMLTNPAR	3	-0.43801	1	1	1.53111e-05	101.08	K(1)NEPEPSFEMLTNPAR	3	0.068533	1
A0A1S3XHL0	37	K	40S ribosomal protein S20-2	3	LOC107765328	1	0.0207726	93.345	NLEK(1)VCADLVR	2	0.77976	1	1	0.00660529	94.402	NLEK(1)VCADLVR	2	1.0069	1	1	0.0105399	100.04	NLEK(1)VCADLVR	2	0.047363	2
A0A1S3Z7K3	32	K	actin-depolymerizing factor 1 isoform X2	1	LOC107783829								1	5.92887e-60	192.65	IEEK(1)QK(1)QVVVEK	4	0.87859	3
A0A1S4CIX2	4	K	dihydrofolate reductase-like isoform X2	1	LOC107819360								0.999718	0.030509	51.436	MENK(1)LEK(0.5)K(0.5)PR	2	-0.33352	1
A0A1S3ZHB8	127	K	"oxygen-evolving enhancer protein 1, chloroplastic-like"	1	LOC107786842	0.529024	0.00116701	52.97	GTGTANQCPTIDGGVESFAFK(0.529)PGK(0.471)YNAK	4	0.03883	1
A0A1S3XGK4	54	K	heat shock cognate protein 80-like	2	LOC107764955	1	0.00424942	85.807	FESLTDK(1)SK	3	-0.78387	2								1	0.0070766	73.841	FESLTDK(1)SK	3	0.15158	1
A0A1S4DA65	6	K	ubiquitin-NEDD8-like protein RUB2	1	LOC107827608															1	0.00254836	185.99	MQIFVK(1)TLTGK	2	-1.0919	15
P18212	234	K	"Oxygen-evolving enhancer protein 2-2, chloroplastic"	3	PSBP2	1	2.22231e-20	187.78	HQLITATVNDGK(1)LYICK	3	0.63906	6	1	2.01295e-63	188.9	HQLITATVNDGK(1)LYICK	3	-0.21267	12	1	6.12477e-12	183.75	HQLITATVNDGK(1)LYICK	2	-0.056187	7
A0A140G1U3	438	K	Photosystem II CP47 reaction center protein	2	psbB								1	0.034872	73.887	ATLK(1)SDGVFR	2	0.27367	1	1	0.000593182	112.11	ATLK(1)SDGVFR	3	0.06466	1
A0A1S4CR54	138	K	"photosystem I reaction center subunit VI-1, chloroplastic-like"	3	LOC107821676	1	0.0012566	96.143	GPQLPPK(1)LGPR	3	-0.47443	1	1	0.000492973	112.3	GPQLPPK(1)LGPR	3	0.18317	2	1	1.18149e-08	145.46	GPQLPPK(1)LGPR	3	0.28665	1
A0A1S4CFJ2	266	K	putative glycerol-3-phosphate transporter 1	1	LOC107818439															1	0.0298075	50.222	K(1)EGEEVTEPLLR	3	-1.8223	1
A0A1S4C2N7	386	K	uncharacterized protein LOC107814518	2	LOC107814518	1	0.000802827	151.26	GNFGNPK(1)QPEVK	2	1.9439	2								1	0.00267352	185.3	VLK(1)GNFGNPK(1)QPEVK	4	0.042349	3
A0A1S4BFA9	42	K	Mitochondrial fission 1 protein	1	LOC107807677	1	2.36357e-05	116.63	EVAEAEK(1)GSSDELK	2	0.062776	1
A0A1S3Z8U8	306	K	Fructose-bisphosphate aldolase	3	LOC107784214	1	4.18743e-05	141.13	ALQQSTLK(1)TWAGK	3	-0.34755	4	1	9.72246e-08	128.08	ALQQSTLK(1)TWAGK	2	0.1978	5	1	0.000218496	105.25	ALQQSTLK(1)TWAGK	2	0.25924	3
O82797	164	K	Proliferating cell nuclear antigen	2	PCNA								1	0.000957889	75.017	DLSSIGDTVVISVTK(1)EGVK	3	0.78159	1	1	0.000417533	77.969	DLSSIGDTVVISVTK(1)EGVK	3	1.6703	1
A0A1S4AJ36	210	K	Phosphoglycerate kinase	1	LOC107798205								1	0.000298936	108.66	FYKEEEKNEPEFAK(1)K	3	-0.57994	1
A0A1S3YH83	36	K	"chaperonin 60 subunit alpha 2, chloroplastic-like"	1	LOC107776143															1	0.0313584	43.958	K(1)K(1)MMVARAGPK	2	2.0057	1
A0A1S4DPF7	187	K	U3 small nucleolar RNA-associated protein 11	1	LOC107832006								0.975958	0.0346641	40.798	VRDLEK(0.976)LYMDMVMQK(0.024)ELQK	3	-3.2765	1
Q9LW96	308	K	Inositol-3-phosphate synthase	3		1	6.11464e-17	191.06	NTLIGGDDFK(1)SGQTK	2	0.64595	4	1	5.60405e-57	187.16	NTLIGGDDFK(1)SGQTK	2	-0.34687	2	1	5.29823e-07	169.3	NTLIGGDDFK(1)SGQTK	2	-0.066566	2
A0A1S4BHX5	55	K	putative serine/threonine-protein kinase	2	LOC107808462								1	0.0163523	61.958	IGK(1)GGFGSVYK	3	-0.17631	1	1	0.0103167	64.224	IGK(1)GGFGSVYK	3	-0.90788	1
A0A1S3YM56	194	K	Cysteine synthase	2	LOC107777625	1	7.45732e-08	103.31	VDALVSGIGTGGTITGSGK(1)YLR	3	0.36213	1	1	4.13467e-14	114.37	VDALVSGIGTGGTITGSGK(1)YLR	3	-0.82475	1
A0A1S4DJU1	188	K	Proteasome subunit beta	1	LOC107830555	1	0.0158782	126.24	LLEK(1)CMR	2	0.65624	1
A0A1S3XNM8	316	K	PHD finger protein MALE MEIOCYTE DEATH 1-like	1	LOC107767068								1	0.0240355	55.335	NAAPNK(1)SEGK(1)EK(1)SVR	2	3.1355	1
A0A1S4DD00	760	K	probably inactive leucine-rich repeat receptor-like protein kinase At3g28040	1	LOC107828314	1	0.00381897	81.448	LVTSK(1)ILQYPEDFDR	2	-1.1331	1
A0A1S4B5W8	240	K	actin-97-like	3	LOC107804820	1	2.46062e-08	103.28	TSSSVEK(1)NYELPDGQVITIGAER	3	0.037009	2	1	5.41546e-11	101.75	TSSSVEK(1)NYELPDGQVITIGAER	3	0.13914	2	1	2.52508e-08	93.551	TSSSVEK(1)NYELPDGQVITIGAER	3	0.63851	2
A0A1S3ZGP8	364	K	S-adenosylmethionine synthase	1	LOC107786628	1	0.00310236	76.927	YQK(1)TAAYGHFGR	3	0.21448	2
A0A1S4DR56	267	K	LIMR family protein At5g01460	3	LOC107832552	1	0.00033866	122.52	K(1)AADALHQEER	2	-1.2401	2	1	2.60534e-10	141.37	K(1)AADALHQEER	2	0.22823	2	1	9.469e-08	146.67	K(1)AADALHQEER	2	-0.33309	2
A0A1S3XLA8	161	K	Phosphotransferase	2	LOC107766493	1	0.0281241	48.229	FVAEEEEK(1)FHQPPGK	3	1.4276	1								1	0.00992255	58.32	FVAEEEEK(1)FHQPPGK	3	0.95294	2
A0A1S4CWV3	143	K	Fructose-bisphosphate aldolase	1	LOC107823486								1	0.00257151	71.402	IVDVLHEQNIVPGIK(1)VDK	3	0.45946	1
A0A1S3YBG9	73	K	NADH dehydrogenase [ubiquinone] 1 alpha subcomplex subunit 12	1	LOC107774558	0.997915	0.0355885	44.367	MAK(0.003)EGK(0.998)SK(0.999)ATSIGK	2	-3.6758	1
A0A1S4CRU9	11	K	Reticulon-like protein	1	LOC107821893															0.507509	0.0176413	64.374	K(0.492)VEK(0.508)SEEHEESVMEK	3	-0.022474	2
A0A1S3ZIQ7	10	K	PHD finger protein ALFIN-LIKE 1-like	1	LOC107787196															1	0.0318936	48.277	TVEEIFK(1)DYNAR	3	0.16819	2
A0A1S4B2F6	1038	K	"putative pentatricopeptide repeat-containing protein At5g06400, mitochondrial"	1	LOC107803717															0.989197	0.0201928	61.265	QDLANTVLQMK(0.022)SDVK(0.989)K(0.989)R	2	0.18827	1
A0A1S3YNM7	69	K	ubiquitin-conjugating enzyme E2 variant 1C isoform X2	2	LOC107778179	0.995991	0.00274893	82.578	LFCDK(0.004)DYPEK(0.996)PPSVR	4	0.77279	1	0.571553	0.0153966	65.565	LFCDK(0.428)DYPEK(0.572)PPSVR	3	1.8518	2
A0A1S3XRL6	379	K	uncharacterized protein LOC107768001	1	LOC107768001															0.99106	0.028992	44.577	ETIVK(0.991)PWTK(0.008)SK(0.001)PESSGKGK	3	-0.16591	1
A0A1S3XQE7	308	K	uncharacterized protein LOC107767636 isoform X1	1	LOC107767636															1	0.0190369	67.113	RICK(1)TCGWK(1)K	3	4.2837	1
A0A1S3XGK4	602	K	heat shock cognate protein 80-like	2	LOC107764955	1	0.0195003	73.927	DSSMAGYMSSK(1)K	2	0.22793	2								1	0.00608649	76.073	DSSMAGYMSSK(1)K	2	-0.071053	1
A0A1S4CK56	66	K	phosphoprotein ECPP44-like	2	LOC107819908								0.808527	0.0256418	62.861	VSEEVAEYK(0.004)EEEK(0.809)K(0.187)EEK	3	2.1343	1	0.778066	0.0111867	62.813	VSEEVAEYK(0.011)EEEK(0.778)K(0.211)EEK	4	0.74361	1
A0A1S4CR78	218	K	ABC transporter I family member 17-like	2	LOC107821655								1	2.58229e-05	96.208	EQNLTVVMVSHSIK(1)QIK	3	0.5102	1	1	0.00729734	57.148	EQNLTVVMVSHSIK(1)QIK	3	1.502	1
A0A1S4B1V5	114	K	probable protein phosphatase 2C 11	3	LOC107803665	1	0.00264039	86.014	ILK(1)AGGFIHAGR	3	0.5721	1	1	0.00128787	92.611	ILK(1)AGGFIHAGR	3	-0.4094	1	1	1.13382e-06	134.84	ILK(1)AGGFIHAGR	3	0.10858	2
A0A140G1S3	21	K	Ribulose bisphosphate carboxylase large chain	3	rbcL	1	6.72826e-10	175.6	EYK(1)LTYYTPEYQTK	3	-0.22873	4	1	7.80102e-08	128.95	EYK(1)LTYYTPEYQTK	2	-0.34484	3	1	2.24146e-09	146.67	EYK(1)LTYYTPEYQTK	2	-2.0167	5
A0A1S3YJT0	98	K	V-type proton ATPase subunit E-like	1	LOC107777047															1	0.0251364	41.485	EAAAK(1)ELLHVSHHHNHHIYK	4	1.11	1
A0A1S3YK10	199	K	"L-ascorbate peroxidase 1, cytosolic-like"	2	LOC107776943								1	0.00145224	68.576	ELLSGEK(1)EGLLQLPSDK	3	0.080323	1	1	1.09066e-06	104.21	ELLSGEK(1)EGLLQLPSDK	3	0.59008	2
A0A1S4ANL4	205	K	uncharacterized protein LOC107799452	1	LOC107799452															1	0.000864684	77.137	VPVQPQQPK(1)TAATPVSGGMR	3	-0.037861	2
Q9FSF0	237	K	Malate dehydrogenase	2	MD1	1	0.011058	94.262	GAAIIK(1)AR	2	-0.62944	2	1	0.029066	94.262	GAAIIK(1)AR	2	0.00087077	1
A0A1S4BX28	91	K	Secretory carrier-associated membrane protein	1	LOC107812801	1	0.0218305	91.658	ELQAK(1)ESELR	2	-0.24461	1
Q5KTN5	124	K	14-3-3 c-1 protein	2	14-3-3								1	0.0282891	56.46	LIPSAASGDSK(1)VFYLK	3	-0.61834	1	1	0.0199741	51.466	LIPSAASGDSK(1)VFYLK	3	1.8308	1
A0A1S4CIY0	177	K	uncharacterized protein LOC107819525	1	LOC107819525															1	0.0349982	66.962	VK(1)EFAERYTR	3	0.60847	1
A0A1S3X6W9	74	K	Pyrophosphate--fructose 6-phosphate 1-phosphotransferase subunit alpha	3	LOC107761890	1	0.00117522	73.168	ATAK(1)VPDAQIITEHPVIR	3	1.0253	1	1	0.00205635	64.298	ATAK(1)VPDAQIITEHPVIR	3	0.13923	1	1	6.65501e-06	94.281	ATAK(1)VPDAQIITEHPVIR	3	-0.13001	1
A0A1S3XU57	185	K	Carbonic anhydrase	3	LOC107768773	1	0.0325653	58.32	NIANMVPAYDK(1)TR	2	0.4628	1	1	0.00067852	113.99	NIANMVPAYDK(1)TR	2	0.039492	1	1	0.00134893	124.07	NIANMVPAYDK(1)TR	2	0.5983	3
A0A1S4AP72	164	K	uncharacterized protein LOC107799819	3	LOC107799819	1	0.0216338	83.204	LEELSK(1)SIETIR	2	1.5695	1	1	0.0128618	63.602	LEELSK(1)SIETIR	3	-0.1773	1	1	0.00745753	67.519	LEELSK(1)SIETIR	3	-1.1214	1
A0A1S4A509	149	K	protein TPR2-like isoform X2	2	LOC107793747								1	0.00176616	99.788	K(1)LIEANPLFR	3	8.7738e-05	1	1	0.00101328	102.53	K(1)LIEANPLFR	3	-0.46198	1
A0A140G1U3	304	K	Photosystem II CP47 reaction center protein	3	psbB	1	0.00346188	60.635	VSAGLAENQSLSEAWSK(1)IPEK	3	0.12854	2	1	8.85744e-09	95.227	VSAGLAENQSLSEAWSK(1)IPEK	3	0.16827	2	1	2.10931e-11	105.38	VSAGLAENQSLSEAWSK(1)IPEK	3	-0.35085	2
A0A1S3YZU3	918	K	Plasma membrane ATPase	1	LOC107781513															1	0.000107566	81.807	LFSEATNFNELNQLAEEAK(1)R	3	0.051009	1
A0A1S4DJM8	693	K	uncharacterized protein LOC107830449	3	LOC107830449	1	0.000178426	102.97	HCQFFCK(1)ECPLER	3	-0.15779	1	1	0.000322241	107.65	HCQFFCK(1)ECPLER	3	-0.92471	3	0.999996	0.0023901	90.412	KHCQFFCK(1)ECPLER	4	-0.54422	3
A0A1S4BE66	271	K	"fructose-1,6-bisphosphatase, cytosolic"	1	LOC107807379															1	0.0079664	63.682	TLLYGGIFLYPADK(1)K	3	0.68865	1
A0A1S3ZXY2	204	K	cell division cycle protein 48 homolog isoform X2	1	LOC107791620															0.999485	0.0199851	43.305	HPQLFK(0.999)SIGVK(0.001)PPK	4	0.43525	1
A0A1S4DJT4	380	K	ubiquitin carboxyl-terminal hydrolase 12-like isoform X4	1	LOC107830540								1	0.0284704	50.222	YHAEEHGLQDAK(1)K	3	0.99007	1
A0A1S4AVQ9	3	K	uncharacterized protein LOC107801911 isoform X2	1	LOC107801911															0.819328	0.0298457	44.377	MVK(0.819)RK(0.181)GCEK	3	-2.656	1
A0A1S3ZNT2	229	K	transcription factor bHLH49-like	1	LOC107788784								1	0.0350091	75.738	ESPLK(1)NAK	2	0.23391	1
A0A1S4C9D4	722	K	ubiquitin-activating enzyme E1 1-like	2	LOC107816375	1	0.0239965	88.495	VLECLDK(1)ER	2	-0.83036	1								1	0.0276514	90.15	VLECLDK(1)ER	2	-1.2899	1
Q9LW96	199	K	Inositol-3-phosphate synthase	1		1	0.0136152	82.831	ANNVIK(1)GTK	2	0.56324	1
A0A1S4ADP2	91	K	UDP-glucose 6-dehydrogenase	3	LOC107796541	1	2.93691e-13	176.56	EADIVFVSVNTPTK(1)TR	2	-0.19368	4	1	3.89949e-39	172.09	EADIVFVSVNTPTK(1)TR	2	0.39383	4	1	1.57038e-09	199.33	EADIVFVSVNTPTK(1)TR	2	0.0091793	5
A0A1S4AAD0	4	K	RPM1-interacting protein 4-like	1	LOC107795462	1	0.0278176	46.39	AEK(1)GRPLPK	3	0.33257	1
A0A1S4CIA8	24	K	uncharacterized protein At5g22580-like	2	LOC107819314								1	2.11757e-07	120.9	FKEDVVVDDILK(1)GLEK	3	0.86774	2	1	3.7632e-06	119.51	FKEDVVVDDILK(1)GLEK	3	0.38917	1
A0A1S4D3F6	498	K	Aconitate hydratase	1	LOC107825601								1	0.0240887	49.298	SDWHACLDNK(1)VGFK	3	-1.7743	1
A0A1S3Y3U0	136	K	Histone H2A	1	LOC107771868								1	0.0070807	122.52	SLINK(1)TTK(1)E	3	0.32151	8
A0A1S3XNP1	11	K	polyubiquitin 11-like	2	LOC107766892	1	5.09099e-05	88.565	K(1)TITLEVESSDTIDNVK	3	-4.0174	3								1	0.00915351	60.062	K(1)TITLEVESSDTIDNVK	3	0.20783	1
A0A1S4ABG9	206	K	uncharacterized protein LOC107795731	2	LOC107795731								1	0.00667017	56.768	EGTFDVQDANLPIK(1)NPNR	3	2.4176	1	1	0.00477901	70.167	EGTFDVQDANLPIK(1)NPNR	3	0.59623	2
P27154	628	K	Phosphoenolpyruvate carboxylase	3	PPC	1	9.00779e-05	167.2	EHGVK(1)LTMFHGR	2	-0.019762	3	1	2.19671e-05	121.61	EHGVK(1)LTMFHGR	4	0.072544	2	1	3.69461e-05	124.42	EHGVK(1)LTMFHGR	2	0.43881	4
A0A1S4BUH9	91	K	protein DA1-related 1-like	1	LOC107812031															0.595755	1.66024e-10	136.3	AIALSLAEEDQK(0.404)GK(0.596)K	3	-0.063791	1
A0A1S4CDB0	18	K	TOM1-like protein 2	2	LOC107817777								1	0.0012492	96.113	LK(1)IGGTEVGQK	3	-0.34155	1	1	0.00440027	75.416	LK(1)IGGTEVGQK	3	0.0093472	1
A0A1S4C5E5	765	K	"protein TOC75-3, chloroplastic-like"	3	LOC107815100	1	0.00340364	84.31	DVK(1)GNPTEVYR	3	0.28179	3	1	0.000893338	104.82	DVK(1)GNPTEVYR	3	0.3202	2	1	0.000992039	97.734	DVK(1)GNPTEVYR	3	0.090571	1
I7GVS5	4	K	Heat shock protein 70	1	NtHsp70															1	1.02647e-15	98.491	AGK(1)GEGPAIGIDLGTTYSCVGVWQHDR	3	-1.2821	1
A0A1S4AC02	63	K	actin-7	1	LOC107795948	1	2.12922e-05	168.83	HTGVMVGMGQK(1)DAYVGDEAQSK(1)R	4	-0.29525	5
A0A1S3ZGN5	9	K	ubiquitin-conjugating enzyme E2 27-like	3	LOC107786534	1	0.00553652	99.973	VQK(1)ELQECNR	2	-0.55081	1	1	7.41064e-29	170.47	VQK(1)ELQECNR	3	-0.45863	2	1	0.00194645	128.91	VQK(1)ELQECNR	3	-0.45019	3
A0A1S4B609	7	K	Protein DETOXIFICATION	2	LOC107804860								1	0.000359974	107.17	MEGEYEK(1)SASVK	2	-0.60004	1	1	0.00223591	90.793	MEGEYEK(1)SASVK	2	-0.56573	1
A0A1S3YAF5	453	K	uncharacterized protein LOC107774043	2	LOC107774043								1	0.00563483	58.32	MIQAIREK(1)LQQVQLEMR	3	1.4342	4	1	0.00364649	71.08	MIQAIREK(1)LQQVQLEMR	2	1.2194	2
A0A1S4BHW2	104	K	eukaryotic translation initiation factor 1A-like	3	LOC107808437	1	0.00313223	88.075	LLK(1)AYGELPENTR	2	3.4093	2	1	0.0121958	69.92	LLK(1)AYGELPENTR	3	-1.3695	2	1	0.00315183	78.615	LLK(1)AYGELPENTR	3	-0.6796	2
A0A1S4C9D4	521	K	ubiquitin-activating enzyme E1 1-like	3	LOC107816375	1	0.000854824	97.203	NLALMGVCCGDK(1)GK	2	-0.67707	1	1	0.00911148	80.507	NLALMGVCCGDK(1)GK	3	-1.1023	2	1	0.0194105	53.3	NLALMGVCCGDK(1)GK	3	-2.0258	1
A0A1S4CKJ4	48	K	"L-ascorbate peroxidase 3, peroxisomal"	3	LOC107819788	1	0.00706031	64.374	LAWHDAGTYDAK(1)SK	3	-0.39051	1	1	0.0170551	53.946	LAWHDAGTYDAK(1)SK	3	-0.27133	1	1	0.00229417	71.513	LAWHDAGTYDAK(1)SK	3	-0.35508	1
A0A1S4B8C6	272	K	polyol transporter 5-like	1	LOC107805587								1	0.0243322	66.962	RPK(1)GDNVWR	3	-0.60109	1
A0A1S4CYA7	322	K	elongation factor-like GTPase 1	2	LOC107823909	1	0.0134145	60.691	DPK(1)AVLQSVLSR	3	-0.71742	1								1	0.0147127	59.418	DPK(1)AVLQSVLSR	3	-0.52562	1
A0A1S4BRS6	3	K	uncharacterized protein LOC107811215	1	LOC107811215	1	0.0324489	48.761	MNK(1)VWRK	3	-4.4953	1
A0A1S4AP44	469	K	glycerol-3-phosphate acyltransferase 1-like	1	LOC107799614															0.9997	0.032294	53.768	NK(1)NK(1)EQSGASSSRYAKGLGK	3	1.2305	1
A0A1S3YH29	42	K	plasma membrane-associated cation-binding protein 1-like	3	LOC107776048	1	5.77032e-05	123.96	EQYSK(1)EFDEK	2	-0.22541	9	1	2.51667e-06	113.44	EQYSK(1)EFDEK	3	0.41237	10	1	0.00190471	169.76	EQYSK(1)EFDEK	3	-0.39559	11
A0A1S3XST3	418	K	uncharacterized protein LOC107768333	2	LOC107768333	1	3.81307e-05	92.439	VAATATVVSNANTPSK(1)AK	3	-0.061593	1	1	0.0041831	60.093	VAATATVVSNANTPSK(1)AK	3	1.2376	1
A0A1S3ZD07	276	K	1-aminocyclopropane-1-carboxylate oxidase	2	LOC107785346	1	0.0328942	55.105	VIYPK(1)FVFEDYMK	3	0.97506	1	1	0.00237	78.964	VIYPK(1)FVFEDYMK	3	0.014487	1
A0A1S3XCZ9	104	K	"protein CURVATURE THYLAKOID 1B, chloroplastic-like"	2	LOC107763650	1	0.0095459	96.034	EALISK(1)IK	2	-1.1437	1								1	0.0330117	82.75	EALISK(1)IK	2	-0.24502	1
A0A1S4AYN0	471	K	"pentatricopeptide repeat-containing protein At3g18110, chloroplastic-like"	1	LOC107802656								1	0.00386991	63.727	MAEASK(1)VMSEMLNAGVK	4	-0.242	1
A0A1S3YNK7	426	K	Glycosyltransferase	1	LOC107778172	0.685835	0.0352781	63.694	ENTK(0.686)K(0.214)WK(0.1)ELAR	3	2.4651	1
A0A1S4D5T7	621	K	AP-2 complex subunit alpha	1	LOC107826292															1	3.32459e-05	93.427	KAEDTEADTAEQSAIK(1)LR	3	1.3619	1
A0A1S3XEW2	788	K	phototropin-2-like	1	LOC107764484								0.999999	0.00394025	89.26	TSCKPQVIK(1)HPPSK	4	-0.16675	1
A0A1S3X073	123	K	"phosphoglycolate phosphatase 1B, chloroplastic-like"	1	LOC107759700	1	0.00287892	84.605	LVFVTNNSTK(1)SR	3	0.6957	1
Q42941	136	K	Ascorbate peroxidase	1	APX	1	0.0138527	60.161	LPDATK(1)GSDHLR	3	-0.28771	1
A0A1S4DK72	121	K	peroxiredoxin-2B-like	2	LOC107830577								1	2.97202e-05	88.486	YTHALGLELDLSEK(1)GLGVR	3	-1.1361	3	1	0.00161804	68.168	YTHALGLELDLSEK(1)GLGVR	3	-0.019396	1
A0A1S4CD21	66	K	uncharacterized protein LOC107817686	3	LOC107817686	1	3.18519e-06	101.17	PHDNQLAYVGGETK(1)ILSVDR	4	0.23788	3	1	5.57021e-11	116.27	PHDNQLAYVGGETK(1)ILSVDR	3	0.83554	3	1	1.53061e-14	149.44	PHDNQLAYVGGETK(1)ILSVDR	3	0.72847	2
A0A1S3ZXY2	261	K	cell division cycle protein 48 homolog isoform X2	2	LOC107791620								1	1.95684e-05	133.99	K(1)AFEEAEK	2	-0.37297	1	1	0.0117721	122.33	K(1)AFEEAEK	2	-0.46599	1
A0A1S3X3V1	164	K	Clathrin light chain	1	LOC107760966															1	0.0232629	60.364	K(1)LTVETNQSTNR	3	0.33384	1
A0A1S4BRD0	279	K	5-methyltetrahydropteroyltriglutamate-- homocysteine methyltransferase-like	1	LOC107811094								1	0.00644987	79.332	GTQTLDLIK(1)GGFPSGK	3	-0.079705	2
Q8VWF9	187	K	Ras-related protein RAB8-2	1	Rab8-4															1	0.00154032	76.728	LSESDSK(1)TEPQAIR	3	0.73384	1
A0A1S4B436	209	K	REF/SRPP-like protein At1g67360	3	LOC107804268	1	5.61738e-19	156.51	AYK(1)QVESAADEKDDAPNSSSSK	3	-0.06572	4	1	1.5694e-143	222.6	AYK(1)QVESAADEKDDAPNSSSSK	3	0.70238	2	1	4.33532e-19	182.15	AYK(1)QVESAADEKDDAPNSSSSK	3	0.32946	3
A0A1S4ASP2	148	K	Peptidyl-prolyl cis-trans isomerase	3	LOC107801011	1	0.0114308	64.224	K(1)AEAVGSGSGR	3	-0.78581	1	1	0.0245759	64.224	K(1)AEAVGSGSGR	3	-1.4702	1	1	0.0234186	53.6	K(1)AEAVGSGSGR	3	-0.098224	2
A0A1S4C5K7	19	K	type-1 glutamine synthetase 1-like isoform X3	1	LOC107815335	1	0.0243624	49.28	K(1)QEMCLADMVIK	2	-0.48863	1
A0A1S4DQL3	4	K	aquaporin PIP1-1-like	3	LOC107832383	1	0.0145649	94.409	MEGK(1)EEDVK	2	1.1781	1	1	0.00430247	77.662	MEGK(1)EEDVK	2	-0.35153	1	1	0.00707546	77.662	MEGK(1)EEDVK	2	0.6899	1
A0A1S3XKG1	339	K	E3 ubiquitin protein ligase	1	LOC107766185															0.998764	0.00293761	68.329	DQLAK(1)AK(0.999)ADVSLYQSLYK(0.001)K	3	1.3899	1
A0A1S4A347	123	K	HVA22-like protein	3	LOC107793218	0.999967	0.000245181	101.54	K(1)K(1)DVFSKPDDILTAAEK	4	0.24784	4	0.999835	8.68402e-05	97.083	K(1)K(1)DVFSKPDDILTAAEK	3	1.3195	6	0.999239	1.63271e-07	111.73	K(0.999)K(0.999)DVFSK(0.002)PDDILTAAEK	4	0.15917	5
A0A1S4AMD6	223	K	plant UBX domain-containing protein 8-like isoform X4	1	LOC107799306															1	2.64171e-12	99.078	AIHELGSK(1)AISEPEGYKPAEEDER	4	-0.19399	4
A0A1S3Z6E6	415	K	V-type proton ATPase subunit H	1	LOC107783503								1	0.0286076	51.528	IIVNDLK(1)AK	3	-1.1113	1
A0A1S3ZVS3	57	K	sorbitol dehydrogenase-like	2	LOC107791051	1	0.00429798	80.387	AVGICGSDVHYLK(1)TLR	3	2.2001	1								1	0.000437743	90.707	AVGICGSDVHYLK(1)TLR	3	-0.18923	1
I7GVS5	513	K	Heat shock protein 70	2	NtHsp70	1	4.84309e-07	185.6	NK(1)ITITNDK(1)GR	3	0.54373	6								1	5.7051e-06	143.7	NK(1)ITITNDK(1)GR	3	-0.33101	6
A0A1S4BWC7	123	K	26S protease regulatory subunit 7 homolog A isoform X1	2	LOC107812550	1	0.00626088	58.564	FVVGLGDK(1)VSPTDIEEGMR	3	0.67034	1	1	0.000334904	76.301	FVVGLGDK(1)VSPTDIEEGMR	3	0.019948	1
A0A1S3YXL2	362	K	"cysteine--tRNA ligase 2, cytoplasmic-like"	1	LOC107780846															1	0.0193226	88.596	VSPQAQECIK(1)K	2	0.34906	1
A0A1S4A2G2	333	K	condensin-2 complex subunit H2-like	2	LOC107793052	1	0.0360177	51.066	PYK(1)K(1)VK(1)SNR	3	-2.4825	1								1	0.01214	67.897	PYK(1)K(1)VK(1)SNR	3	-2.9964	2
A0A1S4CQ40	132	K	Fructose-bisphosphate aldolase	2	LOC107821177	1	0.012407	82.417	CQK(1)YYEAGAR	2	0.53825	1								1	0.0232458	70.399	CQK(1)YYEAGAR	3	0.3115	1
A0A1S4BGN4	134	K	26S proteasome non-ATPase regulatory subunit 4 homolog	3	LOC107808066	1	1.03762e-10	112.53	K(1)NSVALDVVNFGEDDDGKAEK	4	0.034304	3	1	4.21147e-30	148.52	K(1)NSVALDVVNFGEDDDGKAEK	4	0.64583	6	1	9.64365e-20	125.03	K(1)NSVALDVVNFGEDDDGKAEK	4	0.34484	3
A0A1S4AA32	470	K	ATP-citrate synthase beta chain protein 2-like	3	LOC107795386	1	0.00165176	84.352	SIGLIGHTFDQK(1)R	3	1.3625	1	1	0.000779305	96.82	SIGLIGHTFDQK(1)R	3	-0.26488	1	1	0.0340803	53.947	SIGLIGHTFDQK(1)R	3	-0.41209	1
A0A1S4ALM3	29	K	ubiquitin-40S ribosomal protein S27a-like	1	LOC107799069	1	1.24655e-06	157.37	AK(1)IQDK(1)EGIPPDQQR	3	0.20798	23
A0A1S4DHU6	119	K	40S ribosomal protein S10-1-like	3	LOC107829891	1	0.000209153	91.616	TYLNLPSEIVPATLK(1)K	3	0.25495	2	1	0.000337876	90.379	TYLNLPSEIVPATLK(1)K	2	-0.37487	3	1	1.84037e-05	99.796	TYLNLPSEIVPATLK(1)K	3	0.39073	1
A0A1S4B7A4	747	K	receptor protein kinase TMK1-like	1	LOC107805244								1	0.0122851	64.224	LAPEGK(1)GSIQTR	3	0.32239	1
A0A1S4BE66	25	K	"fructose-1,6-bisphosphatase, cytosolic"	2	LOC107807379								1	0.0151088	56.139	FVLNEQSK(1)HPESR	4	3.2215	1	1	0.0278773	47.227	FVLNEQSK(1)HPESR	4	2.7771	1
A0A076L1Z5	62	K	Remorin 2	3	LOC107810092	1	0.000421298	142.89	DIALAHLETEK(1)R	2	-0.6339	1	1	0.000601906	112.84	DIALAHLETEK(1)R	3	0.0087318	2	1	0.00481764	171.32	DIALAHLETEK(1)R	3	-0.44362	3
A0A1S3XQ81	112	K	trafficking protein particle complex subunit 2-like protein	1	LOC107767365															1	0.0287751	71.176	VSTIVK(1)SFGLSSAG	2	-0.47606	1
A0A1S4AGN4	356	K	"GDP-mannose 3,5-epimerase 1-like"	1	LOC107797479								1	1.74755e-31	131.04	SQGVNIANYGSSK(1)VVGTQAPVELGSLR	3	-0.49563	2
A0A1S4D9A2	282	K	elongation factor 1-gamma 2-like isoform X1	2	LOC107827359								1	2.60364e-11	144.65	LYSNTK(1)TNFR	2	0.33919	3	1	0.0046828	93.667	LYSNTK(1)TNFR	2	-0.24006	3
A0A140G1S3	175	K	Ribulose bisphosphate carboxylase large chain	3	rbcL	1	0.0116408	82.261	YGRPLLGCTIK(1)PK	3	0.024755	3	1	0.00281349	100.22	YGRPLLGCTIK(1)PK	2	0.032461	4	1	0.000961035	98.048	YGRPLLGCTIK(1)PK	4	-0.12046	5
Q08IJ1	73	K	ADP ribosylation factor	2	ARF	1	3.85919e-06	119.54	NISFTVWDVGGQDK(1)IRPLWR	3	-0.64312	6								1	2.65451e-08	102.39	NISFTVWDVGGQDK(1)IRPLWR	3	-0.053851	6
A0A1S3YH83	37	K	"chaperonin 60 subunit alpha 2, chloroplastic-like"	1	LOC107776143															1	0.0313584	43.958	K(1)K(1)MMVARAGPK	2	2.0057	1
A0A1S3ZRI4	553	K	uncharacterized TPR repeat-containing protein At1g05150-like	1	LOC107789543	1	0.00530982	66.264	K(1)EIGETDVPLSYSGGVPEK	3	-0.45304	1
A0A1S4D8F1	17	K	V-type proton ATPase catalytic subunit A-like	1	LOC107827110	1	2.24955e-29	134.87	PSLFGGPMTTFEDSEK(1)ESEYGYVR	3	0.28871	1
A0A1S4B5M6	285	K	"malate dehydrogenase, glyoxysomal-like"	2	LOC107804686								1	0.0271323	52.725	FADACLK(1)GLR	3	-0.21633	2	1	0.00847785	66.962	FADACLK(1)GLR	3	-0.081276	1
A0A1S4AC02	233	K	actin-7	3	LOC107795948	1	0.000666566	67.11	LAYVALDYEQELDTAK(1)SSSSVEK	3	-0.022433	2	1	2.66609e-12	104.18	LAYVALDYEQELDTAK(1)SSSSVEK	3	-0.0030503	2	1	1.11755e-11	103.92	LAYVALDYEQELDTAK(1)SSSSVEK	3	0.75931	1
A0A1S3YCZ9	143	K	EKC/KEOPS complex subunit TPRKB-like	1	LOC107774750															1	0.0209432	55.353	INQAQIQK(1)HYK	3	0.12731	1
Q5KTN5	250	K	14-3-3 c-1 protein	2	14-3-3								0.935029	0.000164865	68.657	DNLTLWTSDMQDDGADEIK(0.935)EDPK(0.059)PDEAK(0.006)N	4	-0.39714	2	0.90806	1.10913e-08	82.627	DNLTLWTSDMQDDGADEIK(0.908)EDPK(0.084)PDEAK(0.008)N	4	0.93957	1
A0A1S4D191	70	K	ubiquitin domain-containing protein DSK2b-like isoform X3	1	LOC107824795								1	1.01821e-25	140.63	ILK(1)DEQTLESYGLEADHTVHLVR	4	0.85818	1
Q40589	63	K	Cytosolic ascorbate peroxidase	3	LOC107759703	1	0.000317046	88.283	FK(1)AEQGHGANNGIDIAIR	3	0.17096	4	1	6.76165e-08	110.32	FK(1)AEQGHGANNGIDIAIR	3	-0.12451	3	1	2.43229e-10	119.62	FK(1)AEQGHGANNGIDIAIR	3	-0.8263	3
A0A1S4CXS6	306	K	Fructose-bisphosphate aldolase	2	LOC107823750								1	0.0108923	85.554	ALQQSTLK(1)AWGGK	2	-1.3519	1	1	0.00633262	66.989	ALQQSTLK(1)AWGGK	3	1.2284	1
A0A1S3X7W0	180	K	xanthine dehydrogenase 1-like isoform X2	1	LOC107762161	1	0.0339687	45.347	K(1)LTYLSLSGSNGLK	3	-0.094504	1
A0A1S3YQU8	506	K	pentatricopeptide repeat-containing protein At2g30780-like	1	LOC107778650															1	0.033548	46.069	SLYHCK(1)MVLYASQR	3	-1.0911	1
A0A1S3ZYM9	688	K	5-methyltetrahydropteroyltriglutamate-- homocysteine methyltransferase-like	3	LOC107791827	1	0.000417305	75.608	EGVK(1)YGAGIGPGVYDIHSPR	4	1.5587	1	1	8.5704e-05	80.733	EGVK(1)YGAGIGPGVYDIHSPR	4	0.18411	2	1	0.00052193	74.325	EGVK(1)YGAGIGPGVYDIHSPR	4	0.061916	1
A0A1S4BST6	143	K	vesicle-associated membrane protein 722-like	3	LOC107811510	1	0.0229939	67.994	AQVSEVK(1)GVMMENIEK	3	0.098897	2	1	0.00592526	80.316	AQVSEVK(1)GVMMENIEK	2	0.90541	1	1	0.00136251	73.168	AQVSEVK(1)GVMMENIEK	3	0.3773	1
A0A1S4AJ36	203	K	Phosphoglycerate kinase	1	LOC107798205								0.972114	0.00791132	74.649	FYK(0.028)EEEK(0.972)NEPEFAK	3	-1.2474	1
A0A1S3ZDW5	51	K	60S ribosomal protein L11-1-like	1	LOC107785771								1	0.00069795	84.859	VLEQLSGQSPVFSK(1)AR	3	0.45165	2
A0A1S4BFD9	44	K	Peptidyl-prolyl cis-trans isomerase	2	LOC107807631								1	0.00500279	102.53	ALCTGEK(1)GVGK	3	-1.4396	2	1	0.00492515	114.89	ALCTGEK(1)GVGK	3	-0.70114	2
A0A1S4DPQ9	1066	K	uncharacterized protein LOC107832114	1	LOC107832114	1	0.0124191	57.434	EGYLDLK(1)QYITPEQK	3	3.7994	1
A0A1S4D0S8	8	K	remorin-like	3	LOC107824746	1	2.93142e-18	201.38	AEVEATK(1)VETEK	2	0.34065	2	1	9.12003e-61	193.49	AEVEATK(1)VETEK	2	-0.46432	2	1	4.45695e-08	201.38	AEVEATK(1)VETEK	2	0.22108	3
A0A1S3YUB5	252	K	E3 ubiquitin-protein ligase RING1-like	2	LOC107779647	1	4.43056e-07	99.313	HIYHK(1)DCILPWLELHNSCPVCR	4	0.24535	1	1	0.000928566	65.887	HIYHK(1)DCILPWLELHNSCPVCR	4	-0.33759	2
A0A1S4B6T0	269	K	elongation factor 2-like	2	LOC107805110								1	1.44395e-25	157.37	SK(1)ILSEEFGWDKDLAK	2	-2.9621	7	1	1.38698e-09	129.05	SK(1)ILSEEFGWDKDLAK	3	-0.035312	6
A0A1S4ANT6	41	K	Proteasome subunit alpha type	1	LOC107799726								1	0.0219699	55.105	SK(1)THVILACVNK	3	-0.5838	1
A0A1S4B2J7	567	K	heat shock cognate 70 kDa protein 2	2	LOC107803885	0.999982	0.00372288	112.64	IASK(1)LSAEDKK	2	-0.40716	2	1	0.00031584	122.18	IASK(1)LSAEDK	2	0.62904	2
A0A1S4CVG9	17	K	wound-induced basic protein-like	2	LOC107823039	0.998099	0.0109612	85.522	SFLSQK(0.998)GGASDK(0.002)R	3	0.1681	1								0.964006	0.028484	66.004	SFLSQK(0.964)GGASDK(0.036)R	3	0.81712	1
A0A1S4B7K3	9	K	ubiquitin receptor RAD23c-like isoform X2	3	LOC107805338	0.999998	4.08031e-08	104.49	TLK(1)GTHFEIEVKPEDTVADVK	3	0.33609	2	1	4.2787e-36	151.22	TLK(1)GTHFEIEVKPEDTVADVK	3	-0.54946	2	0.999497	0.00106772	90.758	TLK(0.999)GTHFEIEVK(0.001)PEDTVADVK	4	0.80556	2
A0A1S4AC02	328	K	actin-7	1	LOC107795948	1	0.00259744	98.368	EITALAPSSMK(1)IK	2	-0.34355	1
A0A1S4ANF6	425	K	root phototropism protein 2-like	3	LOC107799631	1	0.0010626	120.55	EK(1)VCSVMDTLK	2	0.37031	3	1	0.000422673	118.9	EK(1)VCSVMDTLK	2	-0.1588	4	1	1.5209e-05	150.09	EK(1)VCSVMDTLK	2	0.014023	4
A0A1S4C0C1	107	K	ubiquitin-40S ribosomal protein S27a-like	1	LOC107813709								1	0.00663897	78.985	LAVLQFYK(1)VDDSGK	3	2.0868	1
A0A1S4BW10	142	K	40S ribosomal protein S11-like	1	LOC107812432															1	0.0139482	53.981	FNVLK(1)VIPAGSAGGGK	3	-0.10308	1
A0A1S4DPA2	167	K	uncharacterized protein LOC107831964	1	LOC107831964								0.996232	0.0191233	59.75	ELIDK(0.004)WPWK(0.996)LIWRTK	3	-3.3163	1
A0A1S4ADW0	3	K	Plasma membrane ATPase	3	LOC107796542	1	1.41106e-32	201.4	AK(1)AISLEEIKNETVDLEK	3	-0.79286	1	1	9.1764e-130	224.64	AK(1)AISLEEIKNETVDLEK	3	-0.089854	5	1	3.81486e-15	197.75	AK(1)AISLEEIKNETVDLEK	3	0.36929	5
A0A1S3YYN8	401	K	patellin-3-like	1	LOC107780867															1	0.00757133	72.325	IQFMEK(1)SIR	3	-0.1604	1
Q8W3J3	187	K	Ras-related protein RAB8-3	3	Rab8-3	1	0.00173175	90.759	LAESDSK(1)AEPQTIR	2	1.6334	1	1	0.00256295	71.529	LAESDSK(1)AEPQTIR	3	-0.17453	1	1	0.00395993	67.846	LAESDSK(1)AEPQTIR	3	0.17187	1
A0A1S3XVH5	113	K	protein QUIRKY-like	3	LOC107769036	0.999995	0.0353117	81.904	DKDLVK(1)DDFVGR	2	-0.25693	1	1	3.74586e-10	113.07	DKDLVK(1)DDFVGR	2	-0.61532	1	0.999928	0.00350355	98	DKDLVK(1)DDFVGR	2	0.35728	2
A0A1S3YYE3	387	K	uncharacterized protein LOC107780985	1	LOC107780985	0.999999	0.0343123	68.016	KLLERWTK(1)EK	3	2.9568	1
I7GVS5	112	K	Heat shock protein 70	2	NtHsp70								0.999868	0.022168	53.958	VIPGPGDKPMIVVNYK(1)GEEK	4	0.57382	1	0.942631	0.015631	58.29	VIPGPGDK(0.057)PMIVVNYK(0.943)GEEK	3	-1.2457	1
A0A1S3ZE04	131	K	"ADP,ATP carrier protein, mitochondrial-like"	2	LOC107785678								1	0.0197048	72.815	LSEPYK(1)GIGDCFGR	2	2.2448	1	1	0.0257342	50.102	LSEPYK(1)GIGDCFGR	3	-0.63277	1
A0A1S4BB30	5	K	Small nuclear ribonucleoprotein E	1	LOC107806389															1	0.0280162	64.757	ASTK(1)VQR	2	-1.8052	1
P93375	43	K	Actin-104 (Fragment)	1									1	9.68559e-14	145.23	DAYVGDEAQSK(1)R	2	-0.34728	2
A0A0A8WHB3	10	K	Aquaporin PIP1 2b	2	LOC107779998	1	5.65394e-32	217.2	AENK(1)EEDVK(1)LGANK	2	-1.0875	9								1	3.23394e-09	190.57	AENK(1)EEDVK(1)LGANK	2	-1.6388	7
A0A1S4AJ36	280	K	Phosphoglycerate kinase	1	LOC107798205								1	0.0199879	52.008	VSSK(1)IGVIESLLEK	3	-0.0039036	1
A0A1S3XHL0	7	K	40S ribosomal protein S20-2	3	LOC107765328	1	4.26107e-18	145.17	AYAAMK(1)ATK(1)PGLEEPQEQIHK	3	-0.45802	12	1	1.06986e-44	160.09	AYAAMK(1)ATK(1)PGLEEPQEQIHK	3	3.6814	21	1	2.009e-21	147.1	AYAAMK(1)ATK(1)PGLEEPQEQIHK	3	-0.34682	13
A0A1S4DA34	29	K	ubiquitin-like protein 5	2	LOC107827598								1	0.00161744	106.62	K(1)LVAAQTGTR	3	-1.2064	1	1	0.000593163	107.55	K(1)LVAAQTGTR	3	0.16623	1
Q9LW96	157	K	Inositol-3-phosphate synthase	3		1	0.00909655	70.412	AK(1)VFDIDLQK	3	0.61243	3	1	0.0137599	64.103	AK(1)VFDIDLQK	3	-0.84341	1	1	0.0131978	84.507	AK(1)VFDIDLQK	3	-0.14879	1
A0A1S3Z7F4	37	K	actin-depolymerizing factor 1	2	LOC107783829	1	0.000957182	160.52	IEEK(1)QK(1)QVVVEK	2	0.4162	2								1	4.93273e-08	142.39	IEEK(1)QK(1)QVVVEK	2	-0.668	2
A0A1S3Z5Z9	131	K	protein NRT1/ PTR FAMILY 6.2-like isoform X2	3	LOC107783447	0.999876	1.03441e-12	138.98	SSVSGFGTDQFDDKDEK(1)EK	3	0.41734	2	0.99956	1.19673e-24	146.67	SSVSGFGTDQFDDKDEK(1)EK	3	1.1189	1	0.998965	3.35834e-12	166.48	SSVSGFGTDQFDDK(0.001)DEK(0.999)EK	3	2.6814	1
A0A1S3Y697	109	K	Glycine cleavage system H protein	1	LOC107772739								1	0.00286359	81.771	EYTK(1)FCEEEDSH	2	-0.89682	2
A0A1S4BC06	217	K	patellin-3-like	1	LOC107806665	0.999534	0.0212966	57.267	VK(0.001)DSFAMLK(1)K(1)TILWR	2	-1.2834	1
A0A1S3X3Y4	111	K	serine/threonine-protein kinase STY8-like	1	LOC107760826															1	0.00203927	63.443	AAFTQEVSVWHK(1)LDHPNVTK	4	-0.50279	1
A0A1S3ZXY2	475	K	cell division cycle protein 48 homolog isoform X2	1	LOC107791620								1	0.00671942	55.189	ELQETVQYPVEHPEK(1)FEK	4	0.094154	1
A0A1S4DPL1	124	K	uncharacterized protein LOC107832067 isoform X2	1	LOC107832067	1	0.0332676	41.242	RAEMMAETGSK(1)PRR	2	-1.8266	1
A0A1S4BWP8	175	K	26S proteasome non-ATPase regulatory subunit 2 homolog A-like	1	LOC107812562								1	0.0185849	59.116	NLAGEISQEYAK(1)R	3	0.49292	1
A0A1S3X2J3	422	K	F-box protein SKIP16-like	2	LOC107760641	1	5.0729e-06	114.64	LADPK(1)GSAFEAEVAR	3	-1.0883	1	1	6.7788e-10	115.83	LADPK(1)GSAFEAEVAR	3	-0.90059	2
A0A1S4B604	309	K	uncharacterized protein LOC107804853	3	LOC107804853	1	0.00205817	94.09	LK(1)ETGDVTSSGDR	2	0.0064695	1	1	0.00754116	88.282	LK(1)ETGDVTSSGDR	2	-0.021678	2	1	0.0262601	50.659	LK(1)ETGDVTSSGDR	3	0.33957	2
A0A1S4CPG9	9	K	60S acidic ribosomal protein P3-like	1	LOC107821001								1	0.0251745	45.221	GVFTFVCK(1)GSGDEWSAK	3	-0.64936	1
A0A1S3XGK4	326	K	heat shock cognate protein 80-like	2	LOC107764955	1	0.00358243	101.56	RAPFDLFDTK(1)K	3	-0.18564	2								1	0.00280092	101.89	RAPFDLFDTK(1)K	3	2.4533	5
A0A1S3Z0E8	273	K	eukaryotic translation initiation factor-like isoform X2	1	LOC107781403								1	0.00557359	69.379	LPPFPSDEPGGK(1)EITFK	3	0.34365	1
Q9FSF0	151	K	Malate dehydrogenase	2	MD1	1	0.00273374	68.413	EYAPSIPEK(1)NISCLTR	3	0.036608	1								1	0.00093623	77.324	EYAPSIPEK(1)NISCLTR	3	-0.012161	2
A0A1S4DK35	174	K	"triosephosphate isomerase, cytosolic isoform X2"	3	LOC107830628	1	3.78048e-21	119.88	VVIAYEPVWAIGTGK(1)VASPAQAQEVHAELR	4	0.50172	2	1	1.12161e-24	111.81	VVIAYEPVWAIGTGK(1)VASPAQAQEVHAELR	4	0.062017	1	1	5.30262e-28	119.45	VVIAYEPVWAIGTGK(1)VASPAQAQEVHAELR	4	0.27729	2
A0A1S4D3E9	1115	K	ubiquitin carboxyl-terminal hydrolase 12-like isoform X2	1	LOC107825543															1	0.0336985	49.442	HTFEK(1)PVK	3	-0.92529	1
A0A1S4BSA2	199	K	"oxygen-evolving enhancer protein 1, chloroplastic-like"	1	LOC107811352	1	0.00102372	105.65	K(1)FCLEPTSFTVK	2	0.71128	3
A0A1S3ZKU8	278	K	caffeic acid 3-O-methyltransferase	3	LOC107788038	1	0.00229185	69.92	WICHDWSDEHCLK(1)FLK	3	1.0212	2	1	0.00116039	74.853	WICHDWSDEHCLK(1)FLK	4	-0.27494	1	1	0.00868707	55.66	WICHDWSDEHCLK(1)FLK	4	2.6431	1
A0A9R6	32	K	Histone H4	3	NtH4	1	0.000821656	117.95	DNIQGITK(1)PAIR	2	0.67887	4	1	4.76047e-10	134.18	DNIQGITK(1)PAIR	2	0.32898	4	1	0.000202442	112.44	DNIQGITK(1)PAIR	3	0.54768	3
A0A1S3WZ50	66	K	cell division control protein 2 homolog D-like	1	LOC107759402								1	0.0351784	53.013	DPHIVK(1)LMDIK	2	-0.22921	1
A0A1S4CYU9	103	K	methylecgonone reductase-like	1	LOC107824103															1	0.0197281	61.56	HDLVLPALK(1)R	3	0.031448	1
A0A1S4CGW7	8	K	GMP synthase [glutamine-hydrolyzing]-like	1	LOC107818590															1	0.0320816	66.962	MEPQTQAK(1)K	2	3.8098	1
A0A1S3XLA8	77	K	Phosphotransferase	1	LOC107766493															1	2.01387e-10	96.633	QVADAMTVEMHAGLASEGGSK(1)LK	3	1.7862	1
Q75ZD6	248	K	14-3-3 h-1 protein	1	14-3-3															0.99644	0.000314967	59.628	DNLTLWTSDMQDDGTDEIK(0.996)EAAK(0.004)PDNEQQ	3	-0.44112	1
A0A1S4ACA6	714	K	protein argonaute 4-like	1	LOC107796081								1	0.00354224	93.598	K(1)PEHIIIFR	3	-0.057756	1
A0A1S4CHY2	542	K	bromodomain-containing protein DDB_G0270170-like	2	LOC107819199	0.981639	0.019873	62.166	MEK(0.236)K(0.391)K(0.391)EEAK(0.982)K	3	-2.2972	1	0.999146	0.0284105	53.597	MEK(0.746)K(0.128)K(0.128)EEAK(0.999)K	3	-1.9506	1
P50218	323	K	Isocitrate dehydrogenase [NADP]	3		1	8.57053e-18	139.02	VHQK(1)GGETSTNSIASIFAWTR	4	-0.34567	5	1	1.41781e-19	126.26	VHQK(1)GGETSTNSIASIFAWTR	3	0.22277	6	1	3.75547e-21	183.21	VHQK(1)GGETSTNSIASIFAWTR	4	0.62967	5
A0A1S3YAN9	72	K	Proteasome subunit beta type	1	LOC107774109	1	0.0150856	64.711	ALQK(1)VLASR	3	-0.82248	1
A0A1S4CAZ2	185	K	"GDP-mannose 3,5-epimerase 1-like"	2	LOC107817046	1	0.00323621	82.494	LATEELCK(1)HYNK	3	-0.28601	1								1	0.000785775	98.898	LATEELCK(1)HYNK	4	0.14857	2
A0A1S3XHL0	10	K	40S ribosomal protein S20-2	3	LOC107765328	1	8.15677e-18	178.67	AYAAMK(1)ATK(1)PGLEEPQEQIHK	3	-0.45802	14	1	2.44872e-23	153	AYAAMK(1)ATK(1)PGLEEPQEQIHK	3	3.6814	14	1	2.66499e-19	141.18	AYAAMK(1)ATK(1)PGLEEPQEQIHK	3	-0.34682	13
A0A1S3YUZ1	322	K	Pyrophosphate--fructose 6-phosphate 1-phosphotransferase subunit beta	1	LOC107780108															1	0.00039964	104.94	NVTDYIADVICK(1)R	3	0.018011	2
A0A1S4C2F8	316	K	Polyadenylate-binding protein	2	LOC107814429								1	4.19933e-06	129.34	FEQTAK(1)EVVDK	2	-1.0117	1	1	0.00820089	95.094	FEQTAK(1)EVVDK	2	-1.1678	1
A0A1S4C7U6	143	K	E3 ubiquitin-protein ligase At3g02290-like	3	LOC107816024	1	0.000104758	96.135	WSQPTFEEGSK(1)EYNK	3	0.022287	2	1	7.76098e-13	134.37	WSQPTFEEGSK(1)EYNK	3	-0.25697	2	1	5.00132e-07	154.72	WSQPTFEEGSK(1)EYNK	2	-0.075351	3
A0A1S4AUT9	220	K	Cysteine synthase	1	LOC107801535															1	7.62878e-14	108.97	LYGVEPVESAILSGGK(1)PGPHK	3	0.3685	3
A0A1S3YC29	783	K	LOW QUALITY PROTEIN: protein transport protein SEC31 homolog B-like	1	LOC107774522															1	0.0226104	61.11	IALSTEPAK(1)DASK	3	1.7115	1
A0A1S4AAI5	340	K	V-type proton ATPase subunit a	2	LOC107795468	1	0.00657534	61.524	K(1)CLVAEGWSPVFATK	3	0.25627	1	1	2.64324e-05	116	K(1)CLVAEGWSPVFATK	2	-0.57063	2
Q9LW96	203	K	Inositol-3-phosphate synthase	1																1	0.0167435	66.92	K(1)EQIDQIIK	3	-0.0444	1
A0A1S4B996	647	K	leucine-rich repeat receptor-like protein kinase TDR	1	LOC107805804								0.993328	0.0277601	52.866	PCGTNGLAAGALEVK(0.007)PQPK(0.993)K	3	3.1299	1
A0A1S4C365	75	K	UDP-arabinopyranose mutase 3	3	LOC107814566	1	0.00169009	116.52	NDINK(1)ILGPK	3	0.41502	2	1	0.00957668	96.171	NDINK(1)ILGPK	3	-0.056479	3	1	0.0289763	50.108	NDINK(1)ILGPK	3	-0.34429	1
A0A1S3X5L8	49	K	40S ribosomal protein S17-like	3	LOC107761505	1	0.0195107	74.611	GISLK(1)LQEEER	2	-1.6796	1	1	1.21564e-11	125.72	GISLK(1)LQEEER	2	-0.99577	1	1	0.034089	84.188	GISLK(1)LQEEER	2	-1.213	1
A0A1S4ADW0	30	K	Plasma membrane ATPase	3	LOC107796542	1	7.30801e-10	175.01	IPIEEVFEQLK(1)CTR	2	0.24017	5	1	3.5234e-44	175.29	IPIEEVFEQLK(1)CTR	2	0.51511	5	1	1.03544e-14	203.32	IPIEEVFEQLK(1)CTR	3	-0.11935	5
A0A1S3Y3U3	436	K	uncharacterized protein LOC107771880	1	LOC107771880															0.839953	0.0288648	59.198	TLK(0.84)IPTYLK(0.16)DYK	2	-1.1901	1
A0A1S4D2Y6	58	K	skin secretory protein xP2-like	1	LOC107825404															1	0.0127334	60.631	K(1)VAAAAADVLDAAQK	3	-1.4301	1
D5FM17	149	K	Nuclear cap-binding protein subunit 2 (Fragment)	1	LOC107820230	1	0.0300044	63.694	LVQK(1)ELEAQR	2	3.3233	1
A0A1S4DBQ6	199	K	Glyceraldehyde-3-phosphate dehydrogenase	3	LOC107828122	1	0.00108052	129	TVDGPSMK(1)DWR	3	0.26682	4	1	0.00114108	107.11	TVDGPSMK(1)DWR	3	-0.29856	3	1	0.00037001	115.29	TVDGPSMK(1)DWR	3	-0.058028	3
A0A1S4CN15	43	K	uncharacterized protein At5g22580-like	1	LOC107820640								1	0.0183934	61.657	SFVWGK(1)DAESHEMLR	3	-2.7424	1
A0A1S4ADW0	445	K	Plasma membrane ATPase	1	LOC107796542								1	0.0294932	58.246	K(1)VHSMMDK	3	-1.0501	1
A0A1S4BWK5	108	K	NADP-dependent glyceraldehyde-3-phosphate dehydrogenase-like	2	LOC107812643	0.981162	0.0230868	67.326	EIAK(0.019)PAK(0.981)DAVTEVVR	3	0.60536	1	0.998969	0.00479723	81.632	EIAK(0.001)PAK(0.999)DAVTEVVR	3	0.12558	2
A0A1S4A2U1	134	K	Histone H2A	2	LOC107793131	1	0.00558008	127.46	SLINK(1)TTK	2	-0.30154	5								1	0.000194292	135.43	SLINK(1)TTK(1)E	3	0.22082	7
P93375	220	K	Actin-104 (Fragment)	1									1	0.00196236	58.964	SSSSVEK(1)SYELPDGQVITIGAER	3	-0.6541	1
A0A1S4CSV1	243	K	transcription factor DICHOTOMA-like isoform X2	1	LOC107822169	0.994119	0.026069	43.68	LETAK(0.039)GPLK(0.972)K(0.994)K(0.994)GK	2	-4.2627	1
A0A1S4BXY1	754	K	receptor-like protein kinase FERONIA	3	LOC107813068	1	0.00353779	74.649	K(1)GTFDQIIDPYLK	3	0.36092	2	1	0.00922039	65.895	K(1)GTFDQIIDPYLK	3	-0.26466	2	1	0.0024111	91.307	K(1)GTFDQIIDPYLK	2	2.094	3
A0A1S4CQE1	77	K	actin-depolymerizing factor 2-like	3	LOC107821365	1	9.79788e-06	105.19	YAVYDFDFLTK(1)ESVPK	3	0.12241	1	1	8.13044e-05	98.421	YAVYDFDFLTK(1)ESVPK	3	0.93957	1	1	5.02433e-06	103.88	YAVYDFDFLTK(1)ESVPK	3	-0.0062054	1
A0A1S4C2N5	50	K	"alpha-1,4-glucan-protein synthase [UDP-forming] 1"	2	LOC107814424	1	0.0017443	77.726	TIK(1)VPEGFDYELYNR	3	-0.20031	1	1	5.1423e-14	122.33	TIK(1)VPEGFDYELYNR	3	0.59866	1
A0A1S3XRU7	143	K	protein SPA1-RELATED 3-like isoform X2	1	LOC107768013															1	0.0259459	47.971	PSCFVMSSFK(1)R	3	2.3581	1
A0A1S4DHV3	630	K	phosphoenolpyruvate carboxylase	3	LOC107830003	1	7.36907e-05	148.28	EYGVK(1)LTMFHGR	3	0.073478	13	1	1.27611e-71	199.03	EYGVK(1)LTMFHGR	3	-0.062533	11	1	7.65065e-08	143	EYGVK(1)LTMFHGR	2	-0.15175	13
A0A1S4BMV6	452	K	glycine-rich domain-containing protein 1-like	2	LOC107809983	1	0.0177126	60.167	METLK(1)PIYLR	3	0.076448	1								1	0.00275546	85.807	METLK(1)PIYLR	3	-0.32178	1
A0A1S4BHH1	94	K	syntaxin-71-like	3	LOC107808330	0.835731	0.00165193	104.7	K(0.836)VK(0.164)GLSGEELAAR	3	0.0057379	1	0.598879	0.000157553	116.98	K(0.599)VK(0.401)GLSGEELAAR	3	-1.0044	2	0.853579	1.62674e-07	133.98	K(0.854)VK(0.146)GLSGEELAAR	3	-1.4706	2
A0A1S3ZVF1	278	K	sulfoquinovosyl transferase SQD2-like	3	LOC107790882	1	0.0014017	83.877	LWNK(1)GVDSESFHPR	3	0.20742	1	1	0.0026686	70.373	LWNK(1)GVDSESFHPR	3	-0.45582	2	1	0.00118714	81.904	LWNK(1)GVDSESFHPR	3	0.42874	2
A0A1S4CPZ9	35	K	desiccation protectant protein Lea14 homolog	1	LOC107821400															0.750331	0.00014134	57.145	VTNMEK(1)PEATIMDVDVK(0.75)K(0.25)ISFDSISYHAK	4	-0.83145	1
A0A1S3XGE8	102	K	protein MRG1-like isoform X2	1	LOC107764870															1	0.00700621	58.626	GSQMK(1)TK(1)GYTGGRGRK	3	-0.10781	1
A0A1S3YUN2	9	K	uncharacterized protein LOC107779997	3	LOC107779997	1	0.00616387	153.34	ASQEYLNK(1)MQVR	2	-0.92463	1	1	0.000476514	108.35	ASQEYLNK(1)MQVR	2	-0.27621	2	1	0.000216562	164.9	ASQEYLNK(1)MQVR	2	-1.1645	3
Q42962	11	K	"Phosphoglycerate kinase, cytosolic"	2									1	0.00992417	91.313	SVGSLK(1)EADLK	3	0.26247	2	1	0.00626577	89.356	SVGSLK(1)EADLK	2	-0.052731	2
A0A1S4CU49	4	K	nucleobase-ascorbate transporter 6	3	LOC107822482	1	9.68312e-05	121.56	AGK(1)ADEPAPHPPK	2	0.19485	5	1	3.15987e-06	124.48	AGK(1)ADEPAPHPPK	2	0.25368	5	1	2.34886e-09	143.55	AGK(1)ADEPAPHPPK	3	0.10831	6
A0A1S4BXY1	768	K	receptor-like protein kinase FERONIA	3	LOC107813068	1	0.0281975	51.528	GK(1)IAPECLK	3	-0.42289	1	1	0.0327295	47.187	GK(1)IAPECLK	3	1.0201	1	1	0.0274254	51.528	GK(1)IAPECLK	3	0.083833	1
A0A1S4CVJ4	74	K	histidine-containing phosphotransfer protein 1-like	1	LOC107823053								1	0.00427587	87.258	K(1)VDAHVHQLK	3	-0.16548	1
A0A1S4BKP9	145	K	temperature-induced lipocalin-1-like	2	LOC107809341	1	0.0164842	77.744	AK(1)EEGYDVSK	2	1.2266	1								1	0.0299997	49.466	AK(1)EEGYDVSK	3	0.0012825	1
A0A1S3XWU9	242	K	"oxygen-evolving enhancer protein 2-1, chloroplastic-like"	3	LOC107769475	0.999778	0.00880228	91.313	LYICK(1)AQAGDKR	3	0.15714	1	0.995991	0.00321948	97.452	LYICK(0.996)AQAGDK(0.004)R	3	0.34124	2	0.999992	0.00736544	92.247	LYICK(1)AQAGDKR	4	0.72083	2
A0A1S3X2G0	9	K	F-box/kelch-repeat protein At5g60570-like	1	LOC107760533															0.951568	0.0316941	44.246	ASETHK(0.022)SK(0.952)K(0.026)VFCCNNK	3	-0.1297	1
W0TY26	256	K	Sucrose transporter	3	SUT1	1	4.79024e-17	134.52	ENELPEKDEQEIDEK(1)AAAGGK	3	0.11234	4	1	3.16513e-36	152.86	ENELPEKDEQEIDEK(1)AAAGGK	3	-0.022445	2	1	1.03469e-17	174.72	ENELPEKDEQEIDEK(1)AAAGGK	3	-0.1657	2
A0A1S4CQE1	37	K	actin-depolymerizing factor 2-like	3	LOC107821365	1	0.0133081	74.698	IEEK(1)QK(1)QVIVEK	3	-0.75644	1	1	0.00943829	87.719	IEEK(1)QK(1)QVIVEK	3	0.62149	1	1	0.00773151	75.088	IEEK(1)QK(1)QVIVEK	3	0.55806	1
A0A1S3YHI6	53	K	GATA type zinc finger protein asd-4-like	2	LOC107776224	1	0.000548155	82.709	VLAEAAQSQFNK(1)DSGK(1)VDNK	3	0.44088	1								1	0.00219242	73.918	VLAEAAQSQFNK(1)DSGK(1)VDNK	3	1.1892	1
Q14TB1	252	K	Heat shock protein 90	3	hsp90	1	0.00645313	85.536	VK(1)EVSNEWSLVNK	2	-1.8229	1	1	9.0027e-05	118.73	VK(1)EVSNEWSLVNK	2	-0.93529	2	1	0.00491077	69.456	VK(1)EVSNEWSLVNK	3	-0.11103	1
A0A1S4CQ71	52	K	actin-like	1	LOC107821481								1	3.43244e-06	88.09	HTGVMVGMGQK(1)DAYVGDEAQSK(1)R	4	-1.4519	4
A0A1S4B6T0	222	K	elongation factor 2-like	2	LOC107805110								1	0.0196379	91.087	ETVLEK(1)SCR	2	0.90534	1	1	0.0260484	97.965	ETVLEK(1)SCR	2	1.3064	1
A0A1S3YHI6	49	K	GATA type zinc finger protein asd-4-like	2	LOC107776224	1	0.000548155	82.709	VLAEAAQSQFNK(1)DSGK(1)VDNK	3	0.44088	1								1	0.00219242	73.918	VLAEAAQSQFNK(1)DSGK(1)VDNK	3	1.1892	1
P68173	7	K	Adenosylhomocysteinase	3	SAHH	1	0.00460515	94.767	ALLVEK(1)TTSGR	2	-1.2072	1	1	0.00660012	84.31	ALLVEK(1)TTSGR	3	0.32821	2	1	0.00145785	180.66	ALLVEK(1)TTSGR	3	0.61915	4
A0A1S4BKX8	448	K	Cellulose synthase	1	LOC107809423	1	0.0271581	75.387	DK(1)VQPSFVK	2	-0.55146	1
A0A1S3ZFK9	10	K	Ubiquitin carboxyl-terminal hydrolase	3	LOC107786199	1	4.18876e-05	179.42	ADSDSACSK(1)R	2	0.6054	1	1	2.81151e-79	208.63	ADSDSACSK(1)R	2	-0.22807	1	1	0.000450347	198.25	ADSDSACSK(1)R	2	0.028945	1
A0A1S4CYS2	379	K	"inner membrane protein PPF-1, chloroplastic-like"	1	LOC107824065															0.900678	0.0258865	69.825	QLK(0.962)EDEK(0.137)K(0.901)K	2	-0.98783	1
A0A1S3X3V1	213	K	Clathrin light chain	1	LOC107760966	1	0.0168398	91.853	EVATIEK(1)K	2	1.3795	1
A0A1S4AAR0	441	K	uncharacterized protein LOC107795530	1	LOC107795530								1	0.0355324	77.533	IDGALK(1)VGQK	2	2.2657	1
A0A1S4D0S8	103	K	remorin-like	2	LOC107824746	1	3.41414e-14	196.15	LSLIK(1)AWEESEK	3	-0.12967	4	1	1.91448e-84	207.95	RLSLIK(1)AWEESEK	3	0.18474	6
A0A1S4BQV8	97	K	uncharacterized protein At5g39865-like	1	LOC107810867															0.998274	0.000550861	70.02	KPSNVQPQSPTK(0.998)HLK(0.002)SFNSDSR	3	-1.763	1
A0A1S4CX52	2	K	pentatricopeptide repeat-containing protein At3g49740-like	1	LOC107823559	1	0.030469	45.081	MK(1)FTRYNR	3	-3.7059	1
A0A077DCK9	99	K	Carbonic anhydrase	1	LOC107821152															1	8.12446e-11	132.23	NPELFGQLAK(1)GQSPK	2	0.76049	4
A0A1S4C2N5	359	K	"alpha-1,4-glucan-protein synthase [UDP-forming] 1"	2	LOC107814424								1	0.019695	57.175	LSIADGPAK(1)AAK	3	-0.74949	1	1	0.00310914	77.674	LSIADGPAK(1)AAK	3	-0.24655	1
A0A1S3ZT25	331	K	uncharacterized protein LOC107790103	1	LOC107790103															1	0.0328959	53.751	AK(1)K(1)MPEEWR	2	-2.22	1
A0A1S3XGK4	440	K	heat shock cognate protein 80-like	2	LOC107764955	1	1.57616e-05	122.66	YHSTK(1)SGDDMTSLK	3	0.21528	1								1	0.00419196	82.515	YHSTK(1)SGDDMTSLK	3	0.51356	1
Q9S820	167	K	NTGP2	2	rac								1	0.000164434	102.63	TQQNVK(1)AVFDAAIK	2	0.65487	1	1	4.83234e-05	115.91	TQQNVK(1)AVFDAAIK	2	0.17482	2
A0A1S3WY84	210	K	bifunctional epoxide hydrolase 2-like	3	LOC107759209	1	1.62379e-07	126.16	LPSWLSQDDLK(1)YYSTK	3	-0.4261	3	1	0.00137814	76.158	LPSWLSQDDLK(1)YYSTK	3	-0.13459	1	1	2.85341e-05	96.773	LPSWLSQDDLK(1)YYSTK	3	-0.25057	3
A0A1S4AC02	240	K	actin-7	3	LOC107795948	1	4.54042e-06	90.084	SSSSVEK(1)NYELPDGQVITIGAER	3	0.095754	4	1	1.15472e-30	144.4	SSSSVEK(1)NYELPDGQVITIGAER	3	0.12472	3	1	0.000432249	69.071	SSSSVEK(1)NYELPDGQVITIGAER	3	-0.05234	4
A0A1S4ADA3	730	K	uncharacterized protein LOC107796276 isoform X3	1	LOC107796276	0.976533	0.0258879	53.351	QK(0.977)SK(0.023)MRIR	3	-4.2723	1
A0A1S4DPX6	71	K	60S ribosomal protein L24	1	LOC107832170															1	0.00819903	102.06	DIAQEAVK(1)K(1)R	2	2.7235	1
A0A1S4DKF6	161	K	uncharacterized protein LOC107830651	1	LOC107830651								1	0.00200823	83.204	ENK(1)EVIAAAVEVK	3	-0.048496	2
A0A1S3YIU8	62	K	proteasome subunit beta type-2-A	2	LOC107776568								1	0.00019914	89.506	AQFTEYVQK(1)NVALYQFR	3	0.19836	2	1	4.78273e-05	90.853	AQFTEYVQK(1)NVALYQFR	3	-0.0094376	1
A0A1S3XRM3	189	K	"oxygen-evolving enhancer protein 3-2, chloroplastic-like"	3	LOC107767928	1	0.0081777	72.096	LQDLTGK(1)LFK	2	-0.53437	2	1	0.031351	75.566	LQDLTGK(1)LFK	2	0.17386	1	1	0.00916693	89.171	LQDLTGK(1)LFK	2	0.28331	3
A0A1S4BLK2	253	K	uncharacterized protein LOC107809605	2	LOC107809605								1	5.06714e-12	128.74	AVVACEGDLEK(1)AGETLR	2	-2.3777	5	1	4.68485e-12	127.05	AVVACEGDLEK(1)AGETLR	3	1.2554	2
A0A1S3Z7F4	82	K	actin-depolymerizing factor 1	2	LOC107783829	1	2.71543e-14	127.3	YAVYDFDFVTAENCQK(1)SR	3	-0.80614	2								1	3.17106e-08	109.04	YAVYDFDFVTAENCQK(1)SR	3	-0.19819	1
A0A1S4AC02	52	K	actin-7	1	LOC107795948	1	6.74488e-18	139.16	HTGVMVGMGQK(1)DAYVGDEAQSK(1)R	4	-0.29525	8
A0A1S3Z8K7	40	K	protein RADIALIS-like 3	1	LOC107784162								1	0.015952	77.674	AVGGK(1)SEEEVK(1)R	3	-3.1356	1
A0A1S3YUT4	140	K	monodehydroascorbate reductase	3	LOC107779915	1	1.61021e-05	101.3	LSDFGVQGADSK(1)NIFYLR	3	0.46483	1	1	0.0255687	59.606	LSDFGVQGADSK(1)NIFYLR	3	0.86163	1	1	0.00167442	68.845	LSDFGVQGADSK(1)NIFYLR	3	-0.48277	1
A0A1S4D206	182	K	Annexin	2	LOC107825155								1	0.0158058	65.495	ISDK(1)AYSDDEVIR	3	1.1948	1	1	0.0262601	50.659	ISDK(1)AYSDDEVIR	3	0.77547	1
A0A1S4DBQ6	303	K	Glyceraldehyde-3-phosphate dehydrogenase	1	LOC107828122	1	0.0030002	76.01	SSIFDAK(1)AGIALSK	3	-0.71275	1
A0A1S3ZJE0	15	K	protein MIZU-KUSSEI 1-like	2	LOC107787388	0.999993	0.00778808	59.673	MK(0.517)SNMAK(0.483)RFQDLSSK(1)R	3	-1.5517	1								0.998685	0.0265268	47.548	MK(0.744)SNMAK(0.257)RFQDLSSK(0.999)R	3	-1.6443	1
A0A1S3Z0K4	132	K	Histone H2A	1	LOC107781461								1	0.019205	74.165	SLINK(1)SSK(1)E	2	1.3872	1
A0A1S4C3G5	159	K	"2-Cys peroxiredoxin BAS1, chloroplastic-like"	2	LOC107814768	1	3.28987e-05	79.467	GLFIIDK(1)EGVIQHSTINNLGIGR	3	-0.40548	1	1	1.50455e-30	142.84	GLFIIDK(1)EGVIQHSTINNLGIGR	4	0.72884	3
A0A1S3YKU6	209	K	BRCA1-associated protein-like isoform X3	3	LOC107777179	1	0.00214181	135.71	LIQSK(1)TDGK	2	0.77526	1	1	0.000407925	126.07	LIQSK(1)TDGK	2	0.30263	1	1	0.00065663	134.05	LIQSK(1)TDGK	2	1.3058	1
A0A1S3ZMF5	182	K	"fructose-1,6-bisphosphatase, cytosolic-like"	3	LOC107788283	1	0.000102591	101.72	NWDGPTSK(1)YVQNCK	2	-0.69828	3	1	0.000190048	103.97	NWDGPTSK(1)YVQNCK	3	-0.64239	2	1	0.000728768	93.348	NWDGPTSK(1)YVQNCK	2	-2.1777	3
A0A1S4CQ23	338	K	T-complex protein 1 subunit gamma	2	LOC107821431	1	0.000296023	107.39	GASK(1)DLLNEVER	3	-0.173	2								1	0.00165523	92.19	GASK(1)DLLNEVER	3	-0.35009	1
A0A1S3ZU09	35	K	uncharacterized protein LOC107790390	1	LOC107790390								1	0.02421	55.806	IFCSCELEK(1)R	3	-0.1708	1
A0A1S4CW84	116	K	GTP-binding protein YPTM2	1	LOC107823280								1	0.0266259	47.621	YASDNVNK(1)LLVGNK	3	-2.3312	1
A0A1S4B745	128	K	pyridoxal 5'-phosphate synthase subunit PDX1	3	LOC107805188	1	1.54293e-09	179.83	K(1)LQAPYDLVMQTK	3	0.032602	5	1	2.08716e-75	197.38	K(1)LQAPYDLVMQTK	3	0.37576	7	1	0.000489196	178.84	K(1)LQAPYDLVMQTK	2	0.43746	5
A0A1S4A5N8	33	K	serine/threonine-protein kinase At3g07070-like	3	LOC107793947	1	0.000578038	83.633	GLEYLHDK(1)ANPPVIYR	3	-0.055408	2	1	0.00990354	54.812	GLEYLHDK(1)ANPPVIYR	4	0.91202	2	1	1.49178e-06	106.42	GLEYLHDK(1)ANPPVIYR	3	0.51139	1
A0A1S4ALM3	63	K	ubiquitin-40S ribosomal protein S27a-like	3	LOC107799069	1	2.8387e-109	268.13	TLADYNLQK(1)ESTLHLVLR	3	0.13798	49	1	1.1654e-161	239.7	TLADYNLQK(1)ESTLHLVLR	3	0.20609	38	1	1.46123e-15	166.92	TLADYNLQK(1)ESTLHLVLR	3	-1.4357	38
Q948K4	144	K	14-3-3 b-2 protein	1	D31								1	0.0286211	52.101	K(1)EAAESTLSAYK	3	0.046812	1
A0A1S3Y115	343	K	uncharacterized protein LOC107771013 isoform X2	1	LOC107771013	1	0.025861	52.937	MLK(1)K(1)EHK(1)K	2	2.8494	2
A0A1S3YEN2	276	K	golgin candidate 5-like	1	LOC107775258								1	0.00182675	71.08	ETLLSSEK(1)QFQTIER	3	-1.404	1
A0A1S4DJT4	850	K	ubiquitin carboxyl-terminal hydrolase 12-like isoform X4	1	LOC107830540								1	0.0334775	56.916	LGVDDPSK(1)IR	3	3.0634	1
A0A1S4CYN9	293	K	"translocase of chloroplast 120, chloroplastic-like"	1	LOC107824053								1	0.00942113	63.462	LSK(1)DQRK(1)AYNDELEYREK	3	2.1872	1
E3W9P7	41	K	Putative PR-10 type pathogenesis-related protein	1	NtSN1b	1	0.022586	53.136	IQK(1)FDIHEGETVK	3	1.029	1
A0A1S3XJB3	37	K	peroxiredoxin-2B-like	1	LOC107765881	1	0.00297001	61.477	YTHALGLELDLSEK(1)GLGVR	4	0.27536	1
A0A1S4BST6	152	K	vesicle-associated membrane protein 722-like	2	LOC107811510								1	0.000455955	102.97	GVMMENIEK(1)VLDR	2	-3.379	4	1	5.05459e-05	113.24	GVMMENIEK(1)VLDR	3	3.9491	2
Q40471	233	K	Eukaryotic initiation factor 4A-9	1																0.999998	0.0159049	98.418	K(1)FMNKPVR	3	-0.16872	1
A0A1S4BDA7	107	K	"2-Cys peroxiredoxin BAS1, chloroplastic"	1	LOC107807034															1	0.0235589	107.29	LSEYIGK(1)K	2	-0.55092	1
Q9AT16	342	K	Ankyrin-repeat protein HBP1	3	LOC107793888	1	0.0340711	65.043	LNNQQEVLK(1)LLEK	3	0.72104	1	1	0.00231243	79.639	LNNQQEVLK(1)LLEK	3	0.18317	1	1	0.0285999	62.035	LNNQQEVLK(1)LLEK	3	-0.33251	1
O24132	101	K	Annexin	1	X671								1	0.00115267	84.508	WTK(1)SNFVLVEIACTR	3	-0.41175	1
A0A1S3ZDB8	67	K	S-adenosylmethionine synthase	1	LOC107785513								1	0.0322637	62.633	ATVDYEK(1)IVR	3	-0.32654	1
A0A1S3ZFK9	211	K	Ubiquitin carboxyl-terminal hydrolase	1	LOC107786199								1	0.0249248	89.698	VIQK(1)MIEK	2	0.074076	1
A0A1S4C0C1	113	K	ubiquitin-40S ribosomal protein S27a-like	1	LOC107813709								1	0.00893915	81.972	VDDSGK(1)VQR	3	-0.69039	2
A0A1S4CT24	344	K	U-box domain-containing protein 33-like isoform X3	1	LOC107822250	0.978695	0.0320583	48.277	GK(0.022)EEANQMK(0.979)SK(1)LNK	3	0.059565	1
Q5KTN5	148	K	14-3-3 c-1 protein	2	14-3-3								1	0.00267098	102.33	K(1)EAAESTLTAYK	3	-0.15048	2	1	0.00162267	112.08	K(1)EAAESTLTAYK	3	0.76647	2
A0A1S4DKK3	90	K	transcription factor IIIB 90 kDa subunit-like isoform X3	1	LOC107830788	1	0.0316313	42.797	K(1)ILWEK(1)MNK(1)EFAK	2	2.8855	1
A0A1S4AF24	38	K	B2 protein-like	1	LOC107796934	0.663737	0.00565036	97.472	LSEQMK(0.664)YK(0.336)GER	2	1.1367	4
A0A1S3XXN7	249	K	"glutamate-1-semialdehyde 2,1-aminomutase, chloroplastic-like"	2	LOC107769957								1	0.0192422	59.265	K(1)TGHAMCGGYIR	3	0.22204	1	1	0.00674303	73.951	K(1)TGHAMCGGYIR	3	0.49174	1
P49730	300	K	Ribonucleoside-diphosphate reductase small chain	1																1	0.0325323	71.501	TNFFEK(1)R	2	-1.0171	1
A0A1S3XU57	141	K	Carbonic anhydrase	3	LOC107768773	1	0.000921393	87.668	YEK(1)NPALYGELSK(1)GQSPK	3	0.62529	3	1	7.58774e-47	178.67	YEKNPALYGELSK(1)GQSPK	3	-0.93593	10	1	5.30398e-15	184	YEKNPALYGELSK(1)GQSPK	3	-0.48644	5
A0A1S3ZYM9	457	K	5-methyltetrahydropteroyltriglutamate-- homocysteine methyltransferase-like	3	LOC107791827	1	0.0020825	98.044	K(1)ISEEEYVK	3	-0.10822	2	1	0.00700891	78.264	K(1)ISEEEYVK	2	-0.71331	2	1	0.0220389	60.691	K(1)ISEEEYVK	2	-0.85717	2
A0A1S4AV98	201	K	"digalactosyldiacylglycerol synthase 2, chloroplastic-like"	3	LOC107801677	1	0.000323269	109.6	ALSDEPAPLADK(1)QR	2	-0.25805	3	1	0.00171969	82.069	ALSDEPAPLADK(1)QR	2	1.0995	4	1	4.60361e-09	139.86	ALSDEPAPLADK(1)QR	2	-0.01041	5
A0A1S3XI16	212	K	trihelix transcription factor GT-2-like	1	LOC107765363															1	0.0320659	57.106	EEGWK(1)QQEIERAK	2	-2.7319	1
Q948K4	82	K	14-3-3 b-2 protein	1	D31								1	0.0346005	44.252	GNEDHVK(1)CIQEYR	3	0.60269	1
A0A1S4AXD5	41	K	Small ubiquitin-related modifier	3	LOC107802245	1	0.000275742	153.97	STQLK(1)K(1)LMNAYCDR	3	-0.30156	8	1	3.26034e-20	160.36	STQLK(1)K(1)LMNAYCDR	3	0.23066	9	1	2.80288e-06	155.42	STQLK(1)K(1)LMNAYCDR	3	-1.1762	7
A0A1S3XPD7	131	K	vesicle-associated membrane protein 711-like isoform X2	3	LOC107767297	1	0.0120916	68.371	LK(1)GEMSQVR	3	-2.127	2	1	0.0261975	54.066	LK(1)GEMSQVR	3	-2.0309	1	1	0.00760576	72.243	LK(1)GEMSQVR	3	-2.0064	1
A0A1S3Z2K0	15	K	costars family protein-like	1	LOC107782058								1	0.00749976	110.63	LKEEIK(1)R	2	0.24316	1
A0A1S4DRL4	311	K	calcium-dependent protein kinase 5-like	1	LOC107832719	1	0.0308095	43.405	HFSAMNK(1)LK(1)K(1)MALR	3	-3.7873	1
A0A1S3ZT96	395	K	probable serine/threonine-protein kinase At4g35230	3	LOC107790171	0.999972	0.00010965	112.62	DKDFK(1)SAIDCYSK	2	0.42497	1	0.999912	0.017988	77.746	DKDFK(1)SAIDCYSK	2	-0.32294	1	1	0.00744593	90.476	DKDFK(1)SAIDCYSK	2	0.14983	1
A0A1S3Y9M0	146	K	Diacylglycerol kinase	3	LOC107773804	1	0.000454462	118.76	FAALGDSCAK(1)VTR	2	-0.57219	2	1	9.23495e-08	128.36	FAALGDSCAK(1)VTR	2	-0.26039	3	1	2.34833e-05	127.02	FAALGDSCAK(1)VTR	2	0.12051	4
A0A1S4C3E2	89	K	heavy metal-associated isoprenylated plant protein 3-like	1	LOC107814707															0.818355	0.00414489	81.625	VVVK(0.818)GEK(0.182)ADPLK	2	0.56358	1
A0A1S4B126	187	K	ras-related protein RABE1a	3	LOC107803437	1	0.00233053	81.185	LADTDSK(1)AEPSTLK	3	0.52877	1	1	0.00290746	69.878	LADTDSK(1)AEPSTLK	3	-0.46077	1	1	0.00150422	77.192	LADTDSK(1)AEPSTLK	3	0.074517	1
Q42946	211	K	"Oxygen-dependent coproporphyrinogen-III oxidase, chloroplastic"	1	CPX															1	0.00427336	64.374	YFETDAPK(1)DAPGAPR	3	-0.30114	1
A0A1S4DCJ7	14	K	AP-1 complex subunit mu-2-like isoform X2	1	LOC107828390	1	0.0322781	41.615	MAGATSALFLLDMK(1)GRCLICRDYR	3	2.5407	1
A0A1S3XHP2	187	K	uncharacterized protein LOC107765259 isoform X2	3	LOC107765259	0.989304	0.000576518	87.99	AAEEDALK(0.989)K(0.011)PNNDFDANEK	4	-0.99413	2	0.995825	2.75741e-06	96.208	AAEEDALK(0.996)K(0.004)PNNDFDANEK	4	-0.67761	2	0.994206	3.66013e-15	125.61	AAEEDALK(0.994)K(0.006)PNNDFDANEK	4	-0.63595	2
A0A1S3YLK9	683	K	TPR repeat-containing protein ZIP4-like	1	LOC107777444															1	0.0152784	40.396	EGNHVMVCK(1)SLIMTVSAIISDERQR	4	-0.9287	1
Q76N23	80	K	Histone H3.3	3	H3	1	0.00112068	113.69	EIAQDFK(1)TDLR	3	-0.40564	3	1	0.00368944	108.35	EIAQDFK(1)TDLR	3	-0.287	4	1	6.18785e-05	133.05	EIAQDFK(1)TDLR	3	0.071689	2
A0A1S3X8R0	73	K	probable polyamine transporter At1g31830 isoform X1	1	LOC107762427															1	0.00564575	76.358	SLQNSQNVDDQK(1)VR	3	0.16188	1
A0A1S4DII6	165	K	ras-related protein RABH1b	2	LOC107830228	1	0.000336735	87.647	K(1)IAAALPGMETLSSAK	3	-1.0482	1	1	0.000153118	93.106	K(1)IAAALPGMETLSSAK	3	-0.59993	2
A0A1S4B0F5	128	K	Serine hydroxymethyltransferase	3	LOC107803263	1	0.00221755	66.809	YYGGNEYIDMAETLCQK(1)R	3	-0.4902	2	1	0.000301807	92.236	YYGGNEYIDMAETLCQK(1)R	3	-0.10256	2	1	0.00276596	69.188	YYGGNEYIDMAETLCQK(1)R	3	-0.079641	1
A0A1S3XFF6	196	K	hsp70-Hsp90 organizing protein 3-like	2	LOC107764535	1	0.0218933	56.087	GDLTPEELK(1)ER	3	0.51874	1								1	0.0194388	77.062	GDLTPEELK(1)ER	2	0.40278	2
A0A1S4BI72	290	K	rhomboid-like protein 19	1	LOC107808565								1	0.0298992	71.513	K(1)AEESERDPTDNV	2	0.17798	1
A0A1S4CK56	70	K	phosphoprotein ECPP44-like	1	LOC107819908															0.701352	0.0325942	45.883	VSEEVAEYK(0.005)EEEK(0.08)K(0.214)EEK(0.701)K	4	2.0597	1
A0A1S3ZZW7	80	K	oxysterol-binding protein-related protein 2A isoform X2	1	LOC107792215								1	0.0203272	90.601	TK(1)LPDPVEK	2	-0.4401	1
A0A076L1Z5	37	K	Remorin 2	2	LOC107810092								1	0.0132871	55.176	ALATVPPPK(1)TDSSTK	3	1.1975	1	1	0.00901658	59.248	ALATVPPPK(1)TDSSTK	3	1.9029	2
A0A1S4C023	243	K	DEAD-box ATP-dependent RNA helicase 56-like isoform X1	1	LOC107813637	1	0.0230864	55.688	K(1)FMQDPMEIYVDDEAK	3	1.885	1
P27491	43	K	"Chlorophyll a-b binding protein 7, chloroplastic"	1	CAB7															1	0.00073282	84.195	AK(1)PVSSGSPWYGPDR	3	-0.5588	1
Q9LW96	484	K	Inositol-3-phosphate synthase	3		1	1.0277e-10	143.83	APLVPPGTPVVNALSK(1)QR	2	-0.016988	2	1	9.70691e-28	152.32	APLVPPGTPVVNALSK(1)QR	2	-0.16718	3	1	8.57376e-13	127.49	APLVPPGTPVVNALSK(1)QR	3	-0.058228	1
A0A1S3XGK4	456	K	heat shock cognate protein 80-like	1	LOC107764955	1	0.027843	54.953	MK(1)EGQNDIYYITGESK	3	3.067	1
A0A1S3ZXY2	631	K	cell division cycle protein 48 homolog isoform X2	2	LOC107791620								1	0.0267411	53.493	HQIFK(1)ACLR	3	0.92749	1	1	0.00943255	67.897	HQIFK(1)ACLR	3	1.272	1
A0A1S4D4M9	305	K	Methyltransferase	1	LOC107825894								1	0.000540036	74.793	NLVSALEYVGLAPK(1)GSQR	3	0.14536	1
A0A1S3XSK7	339	K	Potassium transporter	1	LOC107768329	1	0.0105488	59.182	QK(1)ISMDFMHELGSSLGTVR	4	0.07367	2
A0A1S4CSE2	253	K	desumoylating isopeptidase 1-like	1	LOC107822016															1	0.0177294	73.632	ASEAAALATK(1)R	2	-0.33951	1
A0A1S3X170	580	K	Pescadillo homolog	1	LOC107760163	0.999749	0.0313755	68.463	K(0.998)LLDAMK(0.003)MGK(0.999)EK(1)K	2	0.33423	1
A0A1S3ZTX1	127	K	Superoxide dismutase [Cu-Zn]	1	LOC107790449															1	0.00297389	59.372	AVVVHADPDDLGK(1)GGHELSK	4	0.81783	1
I7GVS5	563	K	Heat shock protein 70	2	NtHsp70	0.999984	8.08301e-09	187.78	NTVKDEK(1)IASK	2	0.28347	2								1	1.49477e-28	239.48	NTVKDEK(1)IASK	3	-0.19474	2
A0A1S4A454	62	K	serine/threonine-protein kinase 16-like	3	LOC107793494	1	0.00278045	68.329	FK(1)DPSLVSDDGTYAMK	3	1.4313	2	1	0.00305298	75.143	FK(1)DPSLVSDDGTYAMK	2	0.47176	4	1	0.000526493	83.252	FK(1)DPSLVSDDGTYAMK	2	-0.5071	2
A0A1S4AAI5	258	K	V-type proton ATPase subunit a	3	LOC107795468	1	0.000264516	105.25	ILK(1)ICEAFGANR	3	-0.53851	1	1	0.000758152	101.71	ILK(1)ICEAFGANR	2	0.41367	2	1	0.000702637	100.09	ILK(1)ICEAFGANR	3	0.06185	1
A0A1S3ZRE4	17	K	uncharacterized protein At4g28440-like	1	LOC107789748								1	0.0235149	58.98	ATTAAAATSTAATTEK(1)K	2	-0.58556	1
A0A1S3Y4M7	211	K	SUMO-activating enzyme subunit 1B-1-like	1	LOC107772135	1	0.0294853	40.352	MTK(1)LYFAMR	2	0.38069	1
A0A1S3ZRE4	121	K	uncharacterized protein At4g28440-like	1	LOC107789748								1	0.0111434	82.241	LAVDK(1)WGR	3	0.19459	1
A0A1S4AVA2	59	K	copper transport protein ATX1-like isoform X2	3	LOC107801743	1	1.96129e-06	108.18	GNVEPEAVFQTVSK(1)TGK	3	-0.75215	2	1	1.025e-07	115.58	GNVEPEAVFQTVSK(1)TGK	3	-0.50903	1	1	4.10356e-05	91.932	GNVEPEAVFQTVSK(1)TGK	3	0.21966	2
A0A1S4DNT1	179	K	Eukaryotic translation initiation factor 3 subunit I	1	LOC107831796								1	0.00320512	86.189	IWDVETGK(1)ILK	3	0.58941	1
A0A1S3ZTZ2	38	K	protein SIEVE ELEMENT OCCLUSION B-like	3	LOC107790470	1	0.000285358	168.83	K(1)ILDTHNPDGR	2	-0.68191	2	1	3.38627e-15	149.49	K(1)ILDTHNPDGR	3	0.027728	2	1	3.91648e-06	152.96	K(1)ILDTHNPDGR	3	0.34145	2
A0A1S3XCV6	279	K	5-methyltetrahydropteroyltriglutamate-- homocysteine methyltransferase-like	2	LOC107763602	1	0.00744037	67.645	GTQTLDLIK(1)GGFPSGK	2	1.1251	3								1	0.00189396	88.385	GTQTLDLIK(1)GGFPSGK	2	1.0687	4
A0A1S4B410	249	K	T-complex protein 1 subunit gamma	1	LOC107804248								1	0.000133752	78.501	K(1)GENQTNAELLREEDWNVLLK	4	-0.18247	1
O49911	158	K	Plasma membrane polypeptide	3	LOC107764465	1	3.83513e-06	175.48	EK(1)EIVVEAEAK	2	-0.26468	6	1	1.50744e-17	152.96	EK(1)EIVVEAEAK	3	0.14176	5	1	0.000129755	168.83	EK(1)EIVVEAEAK	2	0.083039	5
A0A1S4DGE6	256	K	uncharacterized protein LOC107829605 isoform X2	1	LOC107829605								1	0.00916533	67.415	SLSSVDLSK(1)HAVELEK(1)R	2	-3.6578	1
A0A1S3Z9L4	362	K	Non-specific serine/threonine protein kinase	1	LOC107784517								1	0.0344278	44.925	TIISK(1)LEDVAK(1)RLK(1)LK	3	-2.5088	1
A0A1S3WXJ7	97	K	Peptidyl-prolyl cis-trans isomerase	1	LOC107759056								1	0.0324913	43.77	K(1)GGDLGWFPR	3	-1.5932	1
A0A1S4A451	72	K	60S ribosomal protein L36	1	LOC107793582	0.999883	0.0270115	60.102	DKRALK(1)VAK(1)R	3	-0.044798	1
A0A1S4CKJ4	12	K	"L-ascorbate peroxidase 3, peroxisomal"	3	LOC107819788	1	7.15481e-08	132.81	PIVDTEYLK(1)EIEK	2	-1.2397	5	1	2.01871e-15	148.62	PIVDTEYLK(1)EIEK	2	-0.49853	9	1	2.72463e-10	146.27	PIVDTEYLK(1)EIEK	3	0.72137	3
A0A1S4B2J7	560	K	heat shock cognate 70 kDa protein 2	1	LOC107803885								1	0.0205249	78.548	NTVK(1)DEK(1)IASK	3	-0.21274	1
A0A1S3ZZV1	243	K	Elongation factor 1-alpha	1	LOC107792200								1	5.22275e-05	85.737	LPLQDVYK(1)IGGIGTVPVGR	3	0.59384	3
Q9LW96	219	K	Inositol-3-phosphate synthase	1		0.539494	0.00299689	82.449	EK(0.539)NK(0.539)VDK(0.921)VVVLWTANTER	4	0.14397	2
A0A1S4CDB0	304	K	TOM1-like protein 2	2	LOC107817777	1	0.0347181	47.187	ALSK(1)YDELK	3	-0.9089	1	1	0.0292051	82.287	ALSK(1)YDELK	2	1.4656	1
A0A1S4AH28	48	K	uncharacterized protein At3g27210-like	3	LOC107797622	1	0.000620513	80.361	VSDLQLK(1)SQTPAVTAFR	3	0.38471	2	1	3.39479e-62	183.23	VSDLQLK(1)SQTPAVTAFR	3	0.79928	2	1	7.92581e-12	123.76	VSDLQLK(1)SQTPAVTAFR	3	0.7009	1
A0A1S4DNR5	106	K	"keratin, type I cytoskeletal 9-like"	1	LOC107831789	1	0.032901	46.159	GGNNK(1)GQAQGQGQK	3	2.8846	1
P50218	386	K	Isocitrate dehydrogenase [NADP]	3		1	8.47718e-05	128.54	DLALIIHGSK(1)LSR	2	0.27521	1	1	1.28757e-11	141.34	DLALIIHGSK(1)LSR	2	0.069527	2	1	2.68203e-05	126.32	DLALIIHGSK(1)LSR	2	0.2558	3
A0A1S4DD00	704	K	probably inactive leucine-rich repeat receptor-like protein kinase At3g28040	1	LOC107828314															1	0.0254797	49.621	SGSLATGK(1)LVLLDTK	3	0.94116	1
Q42962	341	K	"Phosphoglycerate kinase, cytosolic"	3		1	0.0253223	50.791	FAAGTEAIAK(1)K	3	-1.0127	1	1	0.00889456	72.096	FAAGTEAIAK(1)K	3	0.35614	1	1	0.00588536	79.07	FAAGTEAIAK(1)K	3	-0.12052	1
A0A1S4AP44	467	K	glycerol-3-phosphate acyltransferase 1-like	1	LOC107799614															0.999985	0.032294	53.768	NK(1)NK(1)EQSGASSSRYAKGLGK	3	1.2305	1
A0A1S4D9K9	617	K	5-methyltetrahydropteroyltriglutamate-- homocysteine methyltransferase	2	LOC107827442	1	4.50492e-06	110.04	K(1)AEHAFYLNWAVHSFR	3	0.8289	4								1	6.60739e-08	124.45	K(1)AEHAFYLNWAVHSFR	3	3.8144	5
A0A1S4ACF1	110	K	1-aminocyclopropane-1-carboxylate oxidase-like	3	LOC107796076	1	1.38876e-13	167.29	HLPVSTVYEVPDLEDK(1)YR	4	0.1167	5	1	1.41842e-43	171.78	HLPVSTVYEVPDLEDK(1)YR	2	-0.68357	8	1	2.19298e-13	142.54	HLPVSTVYEVPDLEDK(1)YR	2	0.51465	3
A0A1S3ZLD4	209	K	"stAR-related lipid transfer protein 7, mitochondrial-like"	1	LOC107787958	1	0.00704668	79.489	K(1)FPFFCSDR	3	0.012153	1
A0A1S4AWT3	124	K	Peptidyl-prolyl cis-trans isomerase	3	LOC107802154	1	0.000555743	99.539	ALCTGEK(1)GFGYK	3	-0.62194	2	1	0.00207521	87.713	ALCTGEK(1)GFGYK	3	-0.19718	2	1	0.00595801	69.864	ALCTGEK(1)GFGYK	3	-0.14585	2
A0A1S4C8L1	46	K	40S ribosomal protein S18-like	2	LOC107816127	1	0.00140049	98.997	FANIACK(1)K	2	0.73288	1	1	0.0268092	76.774	FANIACK(1)K	2	-0.049057	1
I2G7N7	5	K	TIP protein	1	TIP															1	0.00668681	64.64	AEEK(1)HHHLFHHK	3	0.57572	1
F2VJ75	347	K	Fructose-bisphosphate aldolase	2	LOC107797422								1	0.0109389	52.814	ALQNTCLK(1)TWGGQPENVK	3	1.6807	1	1	0.0106714	53.453	ALQNTCLK(1)TWGGQPENVK	3	0.24457	1
A0A1S3XSR1	209	K	"digalactosyldiacylglycerol synthase 1, chloroplastic-like"	1	LOC107768312								1	0.029741	46.68	VK(1)SSLK(1)SICK(1)EPEDTK	3	-3.0489	1
A0A1S3XGG5	206	K	"glycine--tRNA ligase, mitochondrial 1-like"	3	LOC107764895	1	2.18208e-07	101.05	ATLESK(1)GEAEFHVCTLDR	3	-0.041275	1	1	0.00492989	72.187	ATLESK(1)GEAEFHVCTLDR	3	0.0032555	1	1	0.0084202	88.951	ATLESK(1)GEAEFHVCTLDR	3	-0.077152	1
A0A1S4CJF7	23	K	uncharacterized protein LOC107819534 isoform X2	2	LOC107819534								1	0.0202241	64.567	FYSAGK(1)FR	3	-0.27403	1	1	0.0243579	57.047	FYSAGK(1)FR	3	-0.36034	1
A0A1S3Z8K7	46	K	protein RADIALIS-like 3	1	LOC107784162								1	0.015952	77.674	AVGGK(1)SEEEVK(1)R	3	-3.1356	1
Q9LW96	224	K	Inositol-3-phosphate synthase	3		0.954418	0.00299689	82.449	NK(0.046)VDK(0.954)VVVLWTANTER	3	2.3502	3	0.99783	0.00768653	67.994	NK(0.002)VDK(0.998)VVVLWTANTER	3	1.3167	1	0.939077	0.00197062	82.663	NK(0.061)VDK(0.939)VVVLWTANTER	3	1.7654	1
Q948K4	246	K	14-3-3 b-2 protein	1	D31								1	3.37574e-05	83.602	DNLTLWTSDMQDDGADEIK(1)ETK	3	1.2511	1
A0A1S3YZ60	194	K	"beta-glucosidase-like SFR2, chloroplastic"	2	LOC107781295								1	0.0213532	58.433	IVASGK(1)IMR	3	0.21864	1	1	0.0205683	61.691	IVASGK(1)IMR	3	0.12024	1
A0A1S4CFV4	49	K	"photosystem I reaction center subunit IV A, chloroplastic"	2	LOC107818546	1	0.0151651	59.618	ESYWYK(1)GTGSVVACDQDPNTR	3	0.90058	1	1	0.0103845	60.561	ESYWYK(1)GTGSVVACDQDPNTR	3	2.4388	1
A0A1S4CHD1	80	K	40S ribosomal protein S3-1-like	2	LOC107819043	1	0.00461173	68.972	FNFK(1)EGTVELYAEK	3	1.4504	1								1	0.000337407	100.11	FNFK(1)EGTVELYAEK	3	1.704	1
A0A1S4BXY1	833	K	receptor-like protein kinase FERONIA	3	LOC107813068	1	2.42412e-08	123.95	MDIEEGFDVTCK(1)GK	3	1.9465	1	1	0.00963363	60.937	MDIEEGFDVTCK(1)GK	3	-0.70972	1	1	0.0136569	67.846	MDIEEGFDVTCK(1)GK	3	0.51986	1
A0A1S4CGB1	488	K	Mitochondrial Rho GTPase	1	LOC107818647								1	0.027229	53.089	EIPEDGVK(1)K	3	-1.4199	1
A0A1S3YBZ7	76	K	peptidyl-prolyl cis-trans isomerase CYP95-like isoform X6	1	LOC107774496															1	0.0321195	67.035	LK(1)NGK(1)HK	2	-0.82412	1
A0A1S4C0C1	11	K	ubiquitin-40S ribosomal protein S27a-like	1	LOC107813709								1	9.4249e-113	208.87	TLTGK(1)TITLEVESSDTIDNVK	3	-2.3716	4
A0A1S4BMC3	44	K	uncharacterized protein LOC107809866 isoform X2	1	LOC107809866	0.900048	0.0264063	52.576	SSKSPSMAK(0.9)SAK(0.1)K	3	-2.6247	1
A0A1S3ZGD3	133	K	SKP1-like protein 1A	2	LOC107786549								1	5.05236e-10	124.78	TFNIK(1)NDFTPEEEEEVRR	3	0.61163	8	1	1.02542e-10	151.73	TFNIK(1)NDFTPEEEEEVRR	4	0.39932	5
A0A1S4DA22	624	K	trafficking protein particle complex II-specific subunit 120 homolog isoform X3	3	LOC107827634	1	6.442e-06	87.802	AWQLGLSDLDAAPGK(1)NISGSTGR	3	-0.13225	3	1	3.2025e-12	103.02	AWQLGLSDLDAAPGK(1)NISGSTGR	3	-0.19691	2	1	5.86798e-06	83.115	AWQLGLSDLDAAPGK(1)NISGSTGR	3	-0.53575	2
A0A1S4A789	139	K	1-aminocyclopropane-1-carboxylate oxidase homolog	1	LOC107794476	1	0.0257237	52.862	GARRFFEQDIEIK(1)K(1)QYYHR	3	1.2779	1
A0A1S3X6W9	499	K	Pyrophosphate--fructose 6-phosphate 1-phosphotransferase subunit alpha	3	LOC107761890	1	0.0127291	65.085	GPGK(1)ASIGVPALHPATVDLK	3	1.2415	1	1	0.0292935	54.511	GPGK(1)ASIGVPALHPATVDLK	3	-0.17305	1	1	0.00317381	60.561	GPGK(1)ASIGVPALHPATVDLK	3	-0.29613	1
A0A1S4CQ71	233	K	actin-like	1	LOC107821481								1	6.19505e-08	92.289	LAYIALDYEQELETAK(1)TSSSVEK	3	0.31599	1
A0A1S4AUF0	423	K	Eukaryotic translation initiation factor 3 subunit E	1	LOC107801330															1	0.0168759	50.392	TYK(1)LVSQLLEHAQTQAAR	3	0.60672	1
A0A1S4AUT9	194	K	Cysteine synthase	1	LOC107801535															1	0.000289773	74.214	VDALVSGIGTGGTITGSGK(1)YLR	3	0.85635	1
A0A1S4BYQ0	217	K	Glyceraldehyde-3-phosphate dehydrogenase	1	LOC107813294								1	0.0119821	51.225	AASFNIIPSSTGAAK(1)AVGK	3	-0.14754	1
A0A1S3YDE5	714	K	Coatomer subunit beta	2	LOC107774878	0.96431	0.0213131	57.525	HATGEFVK(0.036)DENDANK(0.964)LNR	4	-0.47512	1	0.999967	5.8105e-06	101.04	HATGEFVKDENDANK(1)LNR	4	-0.028958	1
A0A1S3ZQX3	328	K	uncharacterized protein LOC107789462	1	LOC107789462	0.984203	0.0286131	58.723	DILWITNK(0.984)LNTSLQK(0.013)K(0.003)K	3	3.9218	1
A0A1S4DQ90	231	K	PI-PLC X-box domain-containing protein DDB_G0293730-like	3	LOC107832296	1	4.60854e-06	103.67	FESNMK(1)HLSEQPPVTSR	3	-0.13633	3	1	1.72611e-08	117.48	FESNMK(1)HLSEQPPVTSR	4	-1.0468	2	1	0.00111357	74.147	FESNMK(1)HLSEQPPVTSR	4	-0.7366	2
A0A1S3ZM86	771	K	nuclear pore complex protein NUP155	1	LOC107788317								1	0.0268471	45.618	NLFGSSASNEGGASNK(1)R	3	-1.5562	1
A0A1S4D5R8	133	K	LOW QUALITY PROTEIN: selenium-binding protein 1-like	1	LOC107826302								1	0.023339	58.824	APSLYK(1)VVEPDDVIQK	3	-0.2108	1
A0A1S3Y0E6	23	K	DEAD-box ATP-dependent RNA helicase 56-like	1	LOC107770853															1	0.00121784	54.521	ENDAYEEELLDYEEDDEK(1)LPDSVTGK	3	0.24334	2
A0A1S4DNM9	52	K	probable pectin methyltransferase QUA2	1	LOC107831723								1	0.0142008	54.276	SAGDQTPLSIK(1)FLSR	3	0.26836	1
A0A1S3XWG5	474	K	Glycosyltransferases	1	LOC107769571								1	0.026401	64.73	SRK(1)HSSRSK(1)R	3	-2.1684	1
A0A1S4DS12	683	K	"long chain acyl-CoA synthetase 9, chloroplastic-like"	3	LOC107832835	1	9.14255e-05	156.36	K(1)AFSDELAQLYSS	2	-0.16596	2	1	1.08417e-34	171.49	K(1)AFSDELAQLYSS	2	-0.35669	2	1	0.000185152	160.52	K(1)AFSDELAQLYSS	2	-0.43875	2
A0A1S4AXD3	65	K	Histone H2B	3	LOC107802329	1	0.0337885	51.335	IYIFK(1)VLK	3	-1.1398	1	1	0.023646	60.972	IYIFK(1)VLK	3	-1.0577	1	1	0.0192401	60.972	IYIFK(1)VLK	3	-1.0344	1
A0A1S4DBQ6	274	K	Glyceraldehyde-3-phosphate dehydrogenase	1	LOC107828122															1	5.21195e-05	191.79	AAIKEESEGK(1)LK	2	0.2073	4
A0A1S4BP68	148	K	ras-related protein RABC2a-like	1	LOC107810401															1	0.00373188	66.448	EEGIALAK(1)ELGSLFLECSAK	3	-0.12024	1
A0A1S3YYF4	103	K	mitochondrial import receptor subunit TOM20-like	3	LOC107781034	1	0.00319937	53.355	IYFDK(1)SAQCFQQAVDADPTNELYR	3	0.35444	1	1	0.0253038	40.533	IYFDK(1)SAQCFQQAVDADPTNELYR	3	-0.31641	2	1	0.00328651	53.304	IYFDK(1)SAQCFQQAVDADPTNELYR	3	-0.87967	2
A0A1S3XGE8	104	K	protein MRG1-like isoform X2	1	LOC107764870															1	0.00700621	58.626	GSQMK(1)TK(1)GYTGGRGRK	3	-0.10781	1
Q9LW96	221	K	Inositol-3-phosphate synthase	1		0.539494	0.00299689	82.449	EK(0.539)NK(0.539)VDK(0.921)VVVLWTANTER	4	0.14397	2
A0A1S4CQE1	39	K	actin-depolymerizing factor 2-like	3	LOC107821365	1	0.0133081	74.698	IEEK(1)QK(1)QVIVEK	3	-0.75644	1	1	0.00943829	87.719	IEEK(1)QK(1)QVIVEK	3	0.62149	1	1	0.00773151	75.088	IEEK(1)QK(1)QVIVEK	3	0.55806	1
A0A1S4CDB0	27	K	TOM1-like protein 2	1	LOC107817777								1	0.0157375	59.574	IGGTEVGQK(1)ITAGMSSMSFK	3	0.85105	1
A0A1S4D3E9	345	K	ubiquitin carboxyl-terminal hydrolase 12-like isoform X2	1	LOC107825543															1	0.0202184	52.891	ESFYDLQLDVK(1)GCR	3	1.1003	2
A0A1S4CDB0	337	K	TOM1-like protein 2	3	LOC107817777	1	0.00301018	92.051	AGK(1)EDALIR	3	0.70701	1	1	0.00633718	92.838	AGK(1)EDALIR	2	0.64583	2	1	0.00504339	80.219	AGK(1)EDALIR	3	0.41014	1
A0A1S3XZJ1	266	K	ribose-phosphate pyrophosphokinase 4-like	3	LOC107770543	1	0.000148531	103.21	VSAYVTHGVFPK(1)R	3	0.27993	1	1	1.45111e-07	126.12	VSAYVTHGVFPK(1)R	3	-0.61779	3	1	0.00289744	85.973	VSAYVTHGVFPK(1)R	3	0.22205	2
A0A1S4C8L4	329	K	dnaJ homolog subfamily B member 4-like	2	LOC107816281	1	0.0206469	92.611	FPSK(1)LTSEQK	2	-2.5533	1								1	0.0307753	88.338	FPSK(1)LTSEQK	2	-2.6502	1
A0A1S4AI39	107	K	DEAD-box ATP-dependent RNA helicase 8-like	3	LOC107797871	1	0.00341359	66.022	TVQSEALDQSSQDWK(1)AR	3	1.1407	1	1	0.00376149	78.95	TVQSEALDQSSQDWK(1)AR	3	-0.54375	1	1	0.00874568	55.322	TVQSEALDQSSQDWK(1)AR	3	3.1614	1
A0A1S4CWX7	59	K	40S ribosomal protein S7	2	LOC107823503	1	0.0263227	50.108	K(1)AVVIHVPYR	3	0.43397	1	1	0.0204144	59.908	K(1)AVVIHVPYR	3	-0.99118	1
A0A1S4D284	290	K	TOM1-like protein 2	1	LOC107825217								1	0.0181274	48.372	QVISK(1)YEEMEAALESGEK	3	4.279	1
A0A075F2H4	70	K	Ubiquitin-conjugating enzyme E2 36-like protein	1	Ubc13-2															1	0.000164149	86.548	LELFLPEEYPMAAPK(1)VR	3	-1.5858	1
A0A1S4DQM5	222	K	inositol transporter 1-like	3	LOC107832142	0.788902	0.000872818	110.98	K(0.211)DK(0.789)AEAVAVLAK	2	0.32866	1	1	0.00521108	101.56	DK(1)AEAVAVLAK	2	-0.27255	2	1	0.00120972	107.53	DK(1)AEAVAVLAK	3	-0.031158	3
Q9AT16	77	K	Ankyrin-repeat protein HBP1	1	LOC107793888								1	2.20614e-09	100.28	ELAEQIAK(1)DPAFNQMAEQLQK	3	-0.20926	2
A0A1S3ZZV1	318	K	Elongation factor 1-alpha	1	LOC107792200								1	2.72664e-08	113.24	GFVASNSK(1)DDPAK	2	-0.36199	4
A0A1S4BID4	172	K	neuroguidin-like isoform X2	1	LOC107808627	1	0.0256346	43.502	LVPAPMEEDK(1)MSR	2	0.15524	1
A0A076L1Z5	68	K	Remorin 2	3	LOC107810092	1	0.000353524	142.83	NSYIK(1)AWEESEK	3	0.92177	4	1	4.3322e-50	188.15	NSYIK(1)AWEESEK	2	0.93581	3	1	7.73552e-07	140.01	NSYIK(1)AWEESEK	2	0.6986	2
P41919	61	K	GTP-binding nuclear protein Ran-B1	1	RAN-B1															1	7.98291e-11	99.846	KYEPTIGVEVHPLDFFTNCGK(1)IR	4	-0.40009	1
A0A1S4DQP4	200	K	ESCRT-related protein CHMP1B-like	2	LOC107832156	1	0.00928199	117.93	LAELK(1)AR	2	1.0571	1	1	0.0182527	123.99	LAELK(1)AR	2	-0.13779	1
A0A1S4CC59	188	K	probable protein phosphatase 2C 35	3	LOC107817486	1	4.79226e-05	118.51	VVAK(1)DLSSDQTPFR	3	-1.2995	4	1	8.87895e-12	135.81	VVAK(1)DLSSDQTPFR	3	-1.0739	4	1	0.000242148	113.25	VVAK(1)DLSSDQTPFR	2	-4.4524	2
A0A1S3ZK36	54	K	uncharacterized protein OsI_027940-like isoform X2	3	LOC107787640	1	0.000366143	124.12	HYELK(1)LELQDK	3	-0.32215	2	1	8.94945e-46	166.7	HYELK(1)LELQDK	2	-0.72526	2	1	0.000248921	125.53	HYELK(1)LELQDK	2	-0.027438	2
A0A1S4D9E6	1790	K	titin-like isoform X9	1	LOC107827382															0.999498	0.033794	69.672	EK(0.999)AEEPK(0.001)VEEK	2	0.33649	1
A0A1S3XSR1	217	K	"digalactosyldiacylglycerol synthase 1, chloroplastic-like"	1	LOC107768312								1	0.029741	46.68	VK(1)SSLK(1)SICK(1)EPEDTK	3	-3.0489	1
I7GVS5	523	K	Heat shock protein 70	2	NtHsp70	1	1.36503e-11	178.85	EEIEK(1)MVQEAEK	3	-4.2309	5								1	1.18698e-06	170.11	LSKEEIEK(1)MVQEAEK	3	-0.63704	4
A0A1S4DDE9	190	K	zinc finger CCCH domain-containing protein 14-like	2	LOC107828626								1	0.00597053	76.221	GGVNSK(1)QICR	3	-0.3261	1	1	0.00616147	71.451	GGVNSK(1)QICR	3	-0.36287	2
A0A1S4BF76	91	K	NEDD8-activating enzyme E1 catalytic subunit-like	2	LOC107807583								1	0.0256284	60.161	K(1)FIGLLEDHPK	3	0.61784	1	1	0.00393107	87.216	K(1)FIGLLEDHPK	3	-0.7048	1
A0A1S3ZAV0	71	K	tripeptidyl-peptidase 2-like isoform X2	2	LOC107784804								1	0.0123473	61.423	LK(1)ESTFLAAQMPK	3	-1.1207	1	1	0.0136082	58.781	LK(1)ESTFLAAQMPK	3	-0.41401	1
A0A1S3Y3U0	13	K	Histone H2A	1	LOC107771868								1	0.0302808	56.746	GLLAGK(1)TTAAAAAAAANK	3	-1.1958	1
P69249	148	K	"Ribulose bisphosphate carboxylase small chain, chloroplastic"	2	RBCS	1	9.10855e-05	84.436	LPMFGCTDATQVLAEVEEAK(1)K	3	0.40498	1	1	0.000293314	74.325	LPMFGCTDATQVLAEVEEAK(1)K	3	-0.28312	1
A0A1S3YFI6	349	K	Coatomer subunit alpha	1	LOC107775546								1	0.0153245	52.112	VYEYSTQK(1)DTQLIPIR	3	-3.754	1
A0A1S4CE38	54	K	ubiquitin domain-containing protein 1-like	3	LOC107818068	1	0.0253214	55.064	K(1)EIWDALR	3	-0.10495	1	1	0.00557958	95.815	K(1)EIWDALR	3	-0.53228	2	1	0.0122158	80.455	K(1)EIWDALR	3	0.315	2
A0A1S4D0S8	80	K	remorin-like	2	LOC107824746	1	0.0307521	80.371	K(1)EGSIDRDAVLAR	2	0.51202	1	1	0.00936183	77.279	K(1)EGSIDRDAVLAR	4	-1.0125	2
A0A1S3XWU9	237	K	"oxygen-evolving enhancer protein 2-1, chloroplastic-like"	3	LOC107769475	1	8.60104e-12	151.44	HQLISATVNDGK(1)LYICK	3	0.18782	3	1	3.68829e-34	160.03	HQLISATVNDGK(1)LYICK	2	0.48261	4	1	3.86971e-28	220.97	HQLISATVNDGK(1)LYICK	2	-0.99199	4
A0A1S4BYM4	377	K	galactokinase-like	3	LOC107813265	1	0.00964466	67.704	AAHVYSEAK(1)R	3	-0.52717	1	1	0.0235118	57.785	AAHVYSEAK(1)R	3	-0.88668	1	1	0.0280111	58.699	AAHVYSEAK(1)R	3	-1.3105	1
A0A1S3Z4X0	268	K	splicing factor U2af small subunit B-like	3	LOC107782838	1	0.00757052	87.696	AK(1)IEQWNR	3	-0.88871	1	1	0.0115078	78.77	AK(1)IEQWNR	3	0.92022	1	1	0.00422641	93.374	AK(1)IEQWNR	3	1.5801	1
A0A140G1Q8	369	K	Photosystem II CP43 reaction center protein	1	psbC															1	0.0202888	65.179	LK(1)K(1)DIQPWQER	3	1.7456	1
A0A0A8WJI1	3	K	Aquaporin PIP2 7b	3	LOC107826207	1	1.36678e-10	166.03	SK(1)DVIEEGQVHQQHGK	2	0.46082	6	1	6.1603e-25	155.37	SK(1)DVIEEGQVHQQHGK	2	-0.45107	10	1	1.30541e-12	137.81	SK(1)DVIEEGQVHQQHGK	2	-0.63492	11
A0A1S3X5I0	43	K	Carbonic anhydrase	2	LOC107761423	1	0.00697957	85.554	NELEDAAVAK(1)IR	2	1.5699	2	1	0.000483684	91.14	NELEDAAVAK(1)IR	3	0.96821	4
A0A1S4AGN4	185	K	"GDP-mannose 3,5-epimerase 1-like"	1	LOC107797479								1	0.000589209	106.16	LATEELCK(1)HYNK	3	0.53708	2
A0A1S4AYN5	167	K	60S ribosomal protein L9-1	2	LOC107802737	1	0.00563541	72.289	SAALINQK(1)CHVK	3	0.25815	1	1	0.0037712	79.23	SAALINQK(1)CHVK	2	-0.58975	2
A0A1S4CD69	102	K	coatomer subunit alpha-1-like	1	LOC107817576															1	0.0019562	70.134	VYEYSTQK(1)DTQLIPIR	3	-3.7317	1
A0A1S4A5S5	317	K	"protein kinase 2B, chloroplastic-like"	1	LOC107794062															1	0.0154942	44.183	TVDNTK(1)VGVEQNLVDWAK(1)PYLGDK(1)RR	4	0.18753	1
A0A1S3XEW2	566	K	phototropin-2-like	3	LOC107764484	1	0.000232694	116.19	LSEQTEQSSAK(1)LVK	2	0.18093	2	1	0.000423357	98.943	LSEQTEQSSAK(1)LVK	2	-0.6582	2	1	7.29531e-06	157.5	LSEQTEQSSAK(1)LVK	2	-0.011349	3
A0A1S3X9D2	682	K	probable LRR receptor-like serine/threonine-protein kinase At1g07650 isoform X3	1	LOC107762637															1	0.0239732	91.123	AATK(1)NFDPANK	2	0.10844	1
A0A1S4AEK7	33	K	probable metal-nicotianamine transporter YSL7	1	LOC107796775	1	0.00714131	55.844	EPYPSNEYSTNNTNSQVDFLTK(1)K	3	-0.79468	1
A0A1S3YDR0	85	K	"pentatricopeptide repeat-containing protein At4g02820, mitochondrial-like"	1	LOC107774982															0.893793	0.0173572	78.098	K(0.894)WK(0.106)EEGHPVR	3	0.11516	1
A0A1S3XWU9	225	K	"oxygen-evolving enhancer protein 2-1, chloroplastic-like"	3	LOC107769475	1	6.17506e-09	105.91	TADGDEGGK(1)HQLISATVNDGK	4	-0.22438	2	1	9.10977e-12	105.5	TADGDEGGK(1)HQLISATVNDGK	4	0.041776	2	1	5.33819e-14	110.74	TADGDEGGK(1)HQLISATVNDGK	4	0.1839	4
A0A1S4BAF7	106	K	probable protein phosphatase 2C 10	3	LOC107806260	1	0.00157401	116.37	AILK(1)AYER	2	0.40701	3	1	0.0134008	93.429	AILK(1)AYER	3	0.18901	4	1	0.00407166	95.741	AILK(1)AYER	3	0.56656	3
A0A1S4CJC2	699	K	leucine-rich repeat receptor-like serine/threonine-protein kinase BAM1	3	LOC107819666	1	0.000359523	90.689	EDNIIGK(1)GGAGIVYK	3	0.22421	1	1	0.0162559	84.753	EDNIIGK(1)GGAGIVYK	2	-1.0391	1	1	0.00139412	74.475	EDNIIGK(1)GGAGIVYK	3	0.58256	1
A0A1S3WZL9	273	K	Glycosyltransferase	1	LOC107759621															1	0.00741791	99.283	HADDENLK(1)GLR	2	-0.015161	1
A0A1S3YCF2	139	K	40S ribosomal protein S12	3	LOC107774609	1	1.88643e-05	96.805	DFGEETEGLHIVQEYVK(1)SH	2	-1.4928	4	1	1.70038e-05	90.422	DFGEETEGLHIVQEYVK(1)SH	4	0.40162	6	1	5.10919e-09	104.88	DFGEETEGLHIVQEYVK(1)SH	4	0.12823	3
Q948K3	247	K	14-3-3 protein	2	D75								1	6.49048e-05	76.241	DNLTLWTSDLPEDAEDAQK(1)GDATNK	3	-0.87862	2	1	1.5971e-10	89.392	DNLTLWTSDLPEDAEDAQK(1)GDATNK	3	-0.62869	1
A0A1S4C929	198	K	Proteasome subunit alpha type	2	LOC107816410	1	0.00210009	75.968	VLSK(1)TMDSTSLTSEK	3	1.4386	1	1	0.00173323	75.02	VLSK(1)TMDSTSLTSEK	3	0.83853	1
A5A2F9	268	K	Phosphoinositide phospholipase C	1	LOC107804925															1	0.0285449	48.216	EYLEASASTTASK(1)ER	3	0.3903	1
A0A1S4AAI5	276	K	V-type proton ATPase subunit a	1	LOC107795468								1	0.0110391	50.87	YSVTEDLGK(1)QAQMITEVSGR	3	-1.5611	1
A0A1S4CNA0	642	K	enolase-phosphatase E1-like isoform X2	1	LOC107820883															1	0.000433677	75.548	VVETSEVAEK(1)VPELEIASR	3	0.31554	1
A0A1S3ZJT5	167	K	uncharacterized protein LOC107787688	1	LOC107787688															0.999975	0.00499245	70.134	HRNMK(1)HVETFMLKNQAPK	3	2.3091	1
A0A1S4DCX5	688	K	receptor protein kinase TMK1-like	1	LOC107828287								1	0.0152231	86.911	EEGLK(1)PLEWTR	2	-0.63662	1
Q9FXS3	131	K	Probable phospholipid hydroperoxide glutathione peroxidase	1																1	0.00108753	85.536	GGFFGDSIK(1)WNFSK	3	-0.1669	1
A0A1S4AVA2	45	K	copper transport protein ATX1-like isoform X2	3	LOC107801743	1	4.52498e-11	132.9	VTVK(1)GNVEPEAVFQTVSK	3	-0.23348	2	1	0.00058547	70.615	VTVK(1)GNVEPEAVFQTVSK	3	0.25488	1	1	3.70585e-05	88.385	VTVK(1)GNVEPEAVFQTVSK	3	-0.19525	1
A0A1S3XEF3	137	K	"Alpha-1,4 glucan phosphorylase"	3	LOC107764127	1	0.000253883	89.913	QIITK(1)AGQEEVAEDWLEK	3	0.7464	2	1	0.000158164	85.176	QIITK(1)AGQEEVAEDWLEK	3	0.34642	2	1	1.50964e-10	121.03	QIITK(1)AGQEEVAEDWLEK	3	0.21201	1
A0A1S3YLV1	230	K	patellin-3-like	1	LOC107777688															1	0.0190043	65.467	VTEK(1)VAAVVEDDGAK	3	-2.2259	1
A0A1S3YJ24	520	K	uncharacterized protein LOC107776830	1	LOC107776830															0.874807	0.0261985	51.286	EECDGLIK(0.875)K(0.125)QMER	3	0.54135	1
A0A1S4BYQ0	253	K	Glyceraldehyde-3-phosphate dehydrogenase	3	LOC107813294	1	0.000415875	150.06	LEK(1)EATYDEIK	2	1.0646	2	1	3.17196e-13	141.71	LEK(1)EATYDEIK	2	1.0077	2	1	4.43825e-05	161.99	LEK(1)EATYDEIK	2	0.88366	3
A0A1S4BKX8	480	K	Cellulose synthase	3	LOC107809423	1	0.000290413	71.756	AQK(1)VPEEGWIMQDGTPWPGNNTR	3	-0.096708	2	1	8.18759e-10	98.76	AQK(1)VPEEGWIMQDGTPWPGNNTR	3	-0.58516	1	1	0.000122095	74.742	AQK(1)VPEEGWIMQDGTPWPGNNTR	3	-0.098937	3
A0A1S4ADW0	929	K	Plasma membrane ATPase	3	LOC107796542	1	1.77002e-05	146.84	ELHTLK(1)GHVESVVK	2	0.20987	3	1	0.00160952	83.877	ELHTLK(1)GHVESVVK	3	0.41441	2	1	0.00277664	99.069	ELHTLK(1)GHVESVVK	3	0.062846	2
A0A1S4BCP4	11	K	aquaporin PIP2-1-like	3	LOC107806939	1	0.0139377	64.422	SLFFGEQMAK(1)DTEVGTEYAPK	3	-0.78595	1	1	0.00246491	71.001	SLFFGEQMAK(1)DTEVGTEYAPK	2	1.7572	2	1	5.64149e-07	94.45	SLFFGEQMAK(1)DTEVGTEYAPK	2	0.34372	6
A0A1S4BAF7	139	K	probable protein phosphatase 2C 10	3	LOC107806260	1	0.00429643	77.124	K(1)LWVANVGDSR	3	-0.28308	1	1	0.000316812	98.898	K(1)LWVANVGDSR	3	0.49028	1	1	0.00143417	101.39	K(1)LWVANVGDSR	3	-0.065118	2
A0A1S3XNT9	137	K	uncharacterized protein LOC107767119	1	LOC107767119								1	0.00410011	70.438	K(1)HTAPK(1)GGVTK(1)PK	2	-2.3866	1
A0A1S4B8J3	323	K	uncharacterized protein LOC107805637	1	LOC107805637								1	0.034015	62.466	K(1)DLHPTQRDGK	2	1.6105	1
A0A1S3XIJ3	76	K	uncharacterized protein At2g23090-like	1	LOC107765588															1	0.00757224	60.691	ADVYACFPHLK(1)K	3	-1.1457	1
A0A1S3ZF85	135	K	V-type proton ATPase subunit D-like	3	LOC107786211	1	0.00261567	126.07	AAEEISLK(1)R	2	0.49138	1	1	0.00126296	117.81	AAEEISLK(1)R	2	0.47403	2	1	0.00378598	122.33	AAEEISLK(1)R	2	0.94766	3
A0A1S3YZT2	244	K	SRSF protein kinase 1-like	1	LOC107781504															1	0.025097	61.165	ISNRRASMGGVGGGAK(1)ANR	3	3.3505	1
A0A1S4BX25	82	K	uncharacterized protein LOC107812797	2	LOC107812797								0.589205	0.0349085	47.302	PRSPK(0.589)K(0.589)VK(0.822)CQDK	3	-1.2684	1	0.928632	0.0266111	58.132	PRSPK(0.452)K(0.929)VK(0.619)CQDK	3	-1.716	1
A0A1S4BQ99	111	K	"alpha-1,4-glucan-protein synthase [UDP-forming] 2"	2	LOC107810758	1	7.21631e-07	111.77	YIYTIDDDCFVAK(1)DPSGK	2	-0.18146	2								1	0.0019408	79.489	YIYTIDDDCFVAK(1)DPSGK	2	0.69705	1
A0A1S4C3E2	202	K	heavy metal-associated isoprenylated plant protein 3-like	1	LOC107814707	1	0.0284338	55.112	LVDYVSK(1)R	3	0.84344	1
A0A1S4BYL2	65	K	probable serine/threonine-protein kinase At5g41260	3	LOC107813161	1	0.000664444	60.133	IATSGFAVENIVSEHGEK(1)APNVVYK	3	-0.41855	1	1	0.000208093	71.651	IATSGFAVENIVSEHGEK(1)APNVVYK	3	0.011632	2	1	0.000515367	60.735	IATSGFAVENIVSEHGEK(1)APNVVYK	3	-0.17887	2
A0A1S4BMV6	204	K	glycine-rich domain-containing protein 1-like	3	LOC107809983	1	0.0288342	51.066	YK(1)GFLHLIR	3	-0.66531	1	1	0.0279171	52.255	YK(1)GFLHLIR	3	-0.39889	1	1	0.0168115	59.35	YK(1)GFLHLIR	3	-0.84968	2
A0A1S3YJ63	132	K	topless-related protein 3-like	1	LOC107776850	1	0.0142352	76.357	ENEQLSK(1)YGDTK	2	0.057728	1
A0A1S4CJ62	167	K	60S ribosomal protein L9-1-like	1	LOC107819630															1	0.00238356	91.961	SAALINQK(1)CHVK	2	-0.53503	2
A0A1S4CHM7	55	K	glycine-rich RNA-binding protein-like	1	LOC107818947	1	0.011693	83.045	GFGFVTFK(1)DEK	2	0.31521	1
A0A1S4ASS6	383	K	uncharacterized protein LOC107800987	3	LOC107800987	1	0.000930156	121.61	K(1)IEEAMSMK(1)K	2	2.2533	1	1	0.017433	74.841	K(1)IEEAMSMK(1)K	2	2.0792	1	1	0.000896496	120.45	K(1)IEEAMSMK(1)K	2	1.8834	1
A0A1S4A0M8	428	K	Coatomer subunit beta	1	LOC107792487															1	0.000674523	113.62	EIIETNPK(1)LR	3	-0.011288	2
A0A1S4CAZ2	27	K	"GDP-mannose 3,5-epimerase 1-like"	2	LOC107817046	1	0.00465911	79.489	EPYWPTEK(1)LR	3	0.83592	1								1	0.0234119	53.597	EPYWPTEK(1)LR	3	0.57061	1
A0A1S4A873	116	K	ras-related protein RABH1e-like	1	LOC107794815															1	0.00469767	76.17	AGFNIK(1)PLFR	3	-0.31302	2
A0A1S4BWC7	53	K	26S protease regulatory subunit 7 homolog A isoform X1	1	LOC107812550								1	0.0233985	78.939	K(1)INDLCGIK	2	0.23026	2
A0A1S3X0X9	195	K	"CBS domain-containing protein CBSX1, chloroplastic-like"	1	LOC107759844								0.838269	0.00846669	57.973	LLLK(0.162)TK(0.838)YRRLPVVDSEGK	4	1.3411	1
A0A1S3ZVF1	266	K	sulfoquinovosyl transferase SQD2-like	1	LOC107790882								1	0.00879359	111.46	DLEAYK(1)VTK	2	-0.016671	1
A0A1S3YA34	559	K	importin-5-like	2	LOC107773943								1	5.21279e-08	114.72	TILVNATDK(1)SNR	2	1.882	2	1	0.00987859	88.021	TILVNATDK(1)SNR	2	1.1862	2
O49911	87	K	Plasma membrane polypeptide	2	LOC107764465	1	0.0205199	53.008	HSTQVQK(1)FLDELVK	3	1.3708	1								1	0.000217531	98.943	HSTQVQK(1)FLDELVK	3	1.3051	1
A0A1S3YEN2	77	K	golgin candidate 5-like	1	LOC107775258								1	0.0301865	40.475	TVTTLMTYLK(1)AK(1)AR	4	0.91426	1
A0A1S3YDE5	428	K	Coatomer subunit beta	2	LOC107774878	1	0.00077051	111.61	EIIETNPK(1)LR	2	0.11464	3	1	0.0014291	108.57	EIIETNPK(1)LR	2	-0.064321	3
A0A1S4AV32	161	K	"linolenate hydroperoxide lyase, chloroplastic-like"	2	LOC107801729								1	0.0165536	64.711	NFSLDILK(1)R	3	-0.10803	1	1	0.00845096	80.455	NFSLDILK(1)R	2	-0.26895	2
A0A1S3ZXY2	641	K	cell division cycle protein 48 homolog isoform X2	3	LOC107791620	1	0.00439563	105.36	SPLSK(1)DVDLR	2	0.34219	3	1	1.51275e-11	146.71	SPLSK(1)DVDLR	2	-0.017788	2	1	0.00183163	112.64	KSPLSK(1)DVDLR	2	1.0341	2
A0A1S4CUD0	138	K	molybdopterin biosynthesis protein CNX1-like	2	LOC107822561	1	0.0141061	59.975	ILK(1)QTSPGVDIR	3	-0.042402	1	1	0.0238792	53.557	ILK(1)QTSPGVDIR	3	1.1944	1
A0A1S3Y3D5	121	K	uncharacterized protein LOC107771592	1	LOC107771592															1	0.0155786	56.936	FLETLGGTK(1)SPGR	3	0.31478	1
A0A1S3Y8R3	295	K	8-hydroxygeraniol dehydrogenase-like	1	LOC107773552	1	0.0169909	44.759	K(1)LVAGSAIGGIK(1)ETQEMLDFASK	3	2.0272	1
A0A1S4BQL5	118	K	3-ketoacyl-CoA synthase	3	LOC107810871	1	0.00638687	73.951	LILK(1)DNPESVK	3	-0.015566	1	1	0.00639903	74.962	LILK(1)DNPESVK	3	1.4816	1	1	0.0034187	79.23	LILK(1)DNPESVK	2	-0.58202	2
A0A1S4A502	4	K	glutathione S-transferase T1-like	1	LOC107793760															1	0.0271445	53.491	MTLK(1)LYVDRMSQPSR	3	-1.9348	1
A0A1S4BQY2	373	K	protein trichome birefringence-like 34	1	LOC107810956								1	0.0314431	54.023	MMK(1)IVESTMHELK	2	3.0688	1
A0A140G1S3	146	K	Ribulose bisphosphate carboxylase large chain	3	rbcL	1	7.14375e-14	141.07	IPPAYVK(1)TFQGPPHGIQVER	3	0.29303	8	1	7.85809e-20	133.93	IPPAYVK(1)TFQGPPHGIQVER	4	0.58281	4	1	2.19195e-16	128.1	IPPAYVK(1)TFQGPPHGIQVER	3	-2.5936	5
A0A1S4BPV8	132	K	uncharacterized mitochondrial protein AtMg00810-like	1	LOC107810644															1	0.0239012	77.318	K(1)GTLLNQR	2	-0.18893	1
A0A1S4CIX2	8	K	dihydrofolate reductase-like isoform X2	1	LOC107819360								0.500141	0.030509	51.436	MENK(1)LEK(0.5)K(0.5)PR	2	-0.33352	1
A0A1S4CZY0	19	K	calmodulin-5-like	3	LOC107824434	1	1.45644e-09	140.46	EAFSLFDK(1)DGDGCITTK	2	0.29314	3	1	1.86233e-08	120.59	EAFSLFDK(1)DGDGCITTK	2	-0.20871	4	1	2.01797e-05	103.04	EAFSLFDK(1)DGDGCITTK	2	-0.40913	3
A0A1S4CKJ4	3	K	"L-ascorbate peroxidase 3, peroxisomal"	3	LOC107819788	1	0.00771491	113.38	AK(1)PIVDTEYLK	2	0.85972	1	1	0.0146678	62.694	AK(1)PIVDTEYLK	2	0.76693	1	1	0.00235082	90.913	AK(1)PIVDTEYLK	2	0.011565	2
A0A1S4C0C1	29	K	ubiquitin-40S ribosomal protein S27a-like	1	LOC107813709								1	3.91231e-93	206.49	AK(1)IQDK(1)EGIPPDQQR	3	-1.1384	40
A0A1S3YPU5	86	K	cytosolic enolase 3-like	1	LOC107778291	1	0.0324391	59.252	IEQELGDQAFYIGEK(1)WR	3	0.51299	1
A0A1S3X1D8	196	K	acid phosphatase 1-like	1	LOC107759996	0.999973	0.0229908	51.786	PVFITGTRESFKQVRITNLK(1)K	2	1.008	1
P30360	354	K	Probable cinnamyl alcohol dehydrogenase 2	2	CAD19	1	0.0176773	72.731	FVVDVAGSK(1)LDQ	2	2.3583	2	1	0.00455336	97.957	FVVDVAGSK(1)LDQ	2	0.29521	1
Q9AT16	6	K	Ankyrin-repeat protein HBP1	2	LOC107793888	1	0.0158391	85.473	SEGEK(1)VLPTASADEK	2	-2.1136	1	1	0.00683681	61.265	SEGEK(1)VLPTASADEK	2	-2.4409	2
A0A1S3X6Y5	321	K	uncharacterized membrane protein At1g16860-like isoform X2	3	LOC107761836	1	0.0137369	60.301	GWDSK(1)AANPEHR	3	0.19439	1	1	3.09434e-08	112.84	GWDSK(1)AANPEHR	2	-0.23123	3	1	0.00381266	74.611	GWDSK(1)AANPEHR	3	0.0012093	2
A0A1S4ADW0	408	K	Plasma membrane ATPase	1	LOC107796542								1	0.00358267	84.297	EVHFLPFNPVDK(1)R	3	-1.2996	1
A0A1S4BL86	5	K	Glutamate decarboxylase	3	LOC107809522	1	6.3692e-08	106.7	VLSK(1)TASESDVSVHSTFASR	4	0.12816	1	1	0.000423843	70.837	VLSK(1)TASESDVSVHSTFASR	4	-0.4351	1	1	1.35642e-16	129.11	VLSK(1)TASESDVSVHSTFASR	3	-0.5602	3
A0A075F2H4	143	K	Ubiquitin-conjugating enzyme E2 36-like protein	2	Ubc13-2								1	0.00165769	94.339	SNEAEAVETAK(1)EWTR	2	0.26263	2	1	0.00021325	104.16	SNEAEAVETAK(1)EWTR	2	0.83293	2
A0A1S4B410	248	K	T-complex protein 1 subunit gamma	1	LOC107804248								1	0.00397852	84.605	IILLDSPLEYK(1)K	3	1.6672	1
A0A1S4ALM3	33	K	ubiquitin-40S ribosomal protein S27a-like	1	LOC107799069	1	1.23596e-06	156.08	IQDK(1)EGIPPDQQR	3	0.6075	65
A0A1S3XNP1	29	K	polyubiquitin 11-like	3	LOC107766892	1	1.24655e-06	157.37	AK(1)IQDK(1)EGIPPDQQR	3	0.20798	23	1	3.91231e-93	206.49	AK(1)IQDK(1)EGIPPDQQR	3	-1.1384	40	1	1.55771e-29	230.96	AK(1)IQDK(1)EGIPPDQQR	3	-0.29744	47
A0A1S3ZXB5	340	K	LRR receptor-like serine/threonine-protein kinase FEI 1	1	LOC107791438								1	0.0327192	60.167	IVK(1)MNEGFDR	3	0.90386	1
A0A1S4DCX5	644	K	receptor protein kinase TMK1-like	3	LOC107828287	1	0.00174605	99.568	SEIAVLTK(1)VR	2	1.2269	3	1	0.00147258	108.43	SEIAVLTK(1)VR	3	-0.20138	5	1	1.69895e-05	137.05	SEIAVLTK(1)VR	2	0.35767	3
O49911	214	K	Plasma membrane polypeptide	1	LOC107764465															1	0.005556	80.387	VEEAPAAVAAPEPPK(1)A	2	0.11776	1
A0A140G1S3	201	K	Ribulose bisphosphate carboxylase large chain	3	rbcL	1	9.46849e-07	103.66	GGLDFTK(1)DDENVNSQPFMR	2	-0.094943	4	1	5.36803e-10	111.58	GGLDFTK(1)DDENVNSQPFMR	3	-0.42283	1	1	0.000158173	80.541	GGLDFTK(1)DDENVNSQPFMR	2	0.83799	4
A0A1S3ZKM9	393	K	Obg-like ATPase 1	1	LOC107787974								1	0.0158704	87.149	FNVSGGGK(1)K	2	0.40108	1
A0A1S4DKE7	398	K	uncharacterized protein LOC107830735	1	LOC107830735								0.710499	0.0325146	43.752	MSWEGWVAWTRVLLMK(0.29)AK(0.71)EK	3	-2.5898	1
A0A1S4BMV6	708	K	glycine-rich domain-containing protein 1-like	1	LOC107809983								1	0.0218904	46.162	GMPLDLEATK(1)GNIAAPAK	3	-0.11396	1
Q947K7	79	K	14-3-3 g-1 protein	3	14-3-3	1	0.000291673	107.09	IVSSIEQK(1)EESR	3	-0.31501	2	1	0.000497971	108.56	IVSSIEQK(1)EESR	2	-1.5481	2	1	0.000333519	105.36	IVSSIEQK(1)EESR	2	-0.39091	3
A0A140G1S3	183	K	Ribulose bisphosphate carboxylase large chain	3	rbcL	1	0.00352926	93.667	LGLSAK(1)NYGR	3	0.11427	2	1	9.74051e-80	211.48	LGLSAK(1)NYGR	3	-0.36358	5	1	0.00149908	94.309	LGLSAK(1)NYGR	3	0.086943	1
A0A1S4AV72	81	K	coatomer subunit alpha-1	1	LOC107801629								1	0.0218745	62.659	VWNYK(1)LHR	3	-3.2471	1
A0A1S4AMQ9	60	K	40S ribosomal protein S15a isoform X2	3	LOC107799417	1	0.00282854	76.759	FDVGVK(1)EIEGWTAR	2	0.22011	3	1	0.000570215	94.673	FDVGVK(1)EIEGWTAR	3	-0.21716	2	1	0.00140194	78.505	FDVGVK(1)EIEGWTAR	3	-0.0026148	1
A0A1S4B8V7	476	K	V-type proton ATPase subunit B2-like	3	LOC107805728	1	2.451e-10	184.87	IPAK(1)TLDQYYSR	3	-0.37556	5	1	1.0588e-111	222.25	IPAK(1)TLDQYYSR	2	0.40874	4	1	4.03568e-09	207.34	IPAK(1)TLDQYYSR	3	-0.18251	4
A0A1S4C2N5	274	K	"alpha-1,4-glucan-protein synthase [UDP-forming] 1"	1	LOC107814424								1	0.0341066	48.188	ASNPFVNLK(1)K	3	0.15703	1
A0A1S3YZU3	440	K	Plasma membrane ATPase	2	LOC107781513	1	0.00373126	67.685	GAPEQILNLAHNK(1)SDIER	3	0.5918	2								1	0.00310098	62.469	GAPEQILNLAHNK(1)SDIER	3	-0.088962	2
A0A1S3ZIW1	259	K	CSC1-like protein ERD4 isoform X2	3	LOC107787373	1	0.000114321	147.73	IK(1)ELIQQLEVEQK	2	0.065463	4	1	0.000723833	112.42	IK(1)ELIQQLEVEQK	2	-0.20116	3	1	1.9996e-07	137.81	IK(1)ELIQQLEVEQK	2	-0.13645	3
A0A1S3Z7K3	75	K	actin-depolymerizing factor 1 isoform X2	1	LOC107783829								1	2.31214e-07	108.18	YAVYDFDFVTAENCQK(1)SR	3	-0.29865	2
A0A1S3XJB3	15	K	peroxiredoxin-2B-like	1	LOC107765881	1	0.0317122	48.948	HVK(1)FLADGAGK	3	0.72488	1
P35494	194	K	"2,3-bisphosphoglycerate-independent phosphoglycerate mutase"	3		1	1.10414e-06	139.19	EK(1)GIDAQVASGGGR	3	0.034618	4	1	2.83211e-05	115.34	EK(1)GIDAQVASGGGR	3	-0.24572	1	1	0.000258372	97.69	EK(1)GIDAQVASGGGR	3	-0.19249	2
A0A1S4C5K9	156	K	VAMP-like protein YKT61	1	LOC107815169															1	0.0281147	50.659	IILHK(1)TIDSVLER	3	-1.262	1
Q5DKU8	284	K	Adenosine kinase isoform 2S	1	LOC107831395	1	0.0267928	52.247	LFPVIPLPK(1)EK	3	-0.12507	1
A0A1S4ADW0	939	K	Plasma membrane ATPase	3	LOC107796542	1	0.00459094	80.102	LK(1)GLDIETIQQHYTV	2	-0.046012	1	1	0.00202457	69.878	LK(1)GLDIETIQQHYTV	3	0.16207	1	1	3.38615e-06	119.54	LK(1)GLDIETIQQHYTV	3	0.20128	4
P69040	70	K	Eukaryotic translation initiation factor 5A-1	3	EIF-5A1	1	2.16342e-11	122.19	K(1)LEDIVPSSHNCDVPHVNR	4	0.51003	2	1	2.89725e-07	99.011	K(1)LEDIVPSSHNCDVPHVNR	4	0.16982	2	1	8.52071e-09	104.16	K(1)LEDIVPSSHNCDVPHVNR	4	0.0050192	2
A0A1S3YNM7	95	K	ubiquitin-conjugating enzyme E2 variant 1C isoform X2	2	LOC107778179								1	4.65394e-06	131.11	K(1)FALLANWQR	3	-0.51507	1	1	0.000205537	130.66	K(1)FALLANWQR	3	-1.1722	1
A0A1S4ADF0	1045	K	kinesin-like protein KCA2	1	LOC107796397															1	0.00641732	85.807	SALESVDHK(1)R	3	1.2879	1
A0A1S3XXN4	25	K	Autophagy-related protein	1	LOC107769966															1	0.00210306	99.669	EK(1)YPDRIPVIVEK	3	0.15621	1
A0A1S4CVJ4	115	K	histidine-containing phosphotransfer protein 1-like	3	LOC107823053	1	0.000218792	88.427	NYCEQQIVEGCLK(1)CLQQVK	3	0.23533	2	1	0.000930678	68.123	NYCEQQIVEGCLK(1)CLQQVK	3	-0.80599	1	1	3.96275e-10	107.63	NYCEQQIVEGCLK(1)CLQQVK	3	-0.58854	2
A0A1S4DCX5	750	K	receptor protein kinase TMK1-like	2	LOC107828287	1	0.0008971	106.26	LAPDGK(1)ASVVTR	2	1.3655	1	1	0.000160294	120.57	LAPDGK(1)ASVVTR	2	2.3065	1
A0A1S3YNV9	4	K	uncharacterized protein LOC107778238	1	LOC107778238															0.999668	0.0338458	41.695	MDRK(1)LVVK(0.928)IAEGGK(0.072)CDEK	3	-0.87594	1
A0A1S3Z6X4	9	K	ubiquitin receptor RAD23c-like	3	LOC107783652	0.999972	1.79348e-08	104.81	TLK(1)GSHFEIEVKPEDTVADVK	4	0.15525	4	0.999994	7.45879e-15	111.35	TLK(1)GSHFEIEVKPEDTVADVK	3	0.16514	2	0.99987	2.73e-10	101.61	TLK(1)GSHFEIEVKPEDTVADVK	4	-0.20741	3
A0A1S4AC02	115	K	actin-7	1	LOC107795948	1	2.59936e-09	109.77	VAPEEHPVLLTEAPLNPK(1)ANR	3	-0.34644	2
A0A1S3XFP3	358	K	ATP-dependent 6-phosphofructokinase	1	LOC107764603															0.998566	0.0181004	53.136	IK(0.999)EHFSK(0.001)QKKMLINLK	3	-0.0046206	1
A0A1S4CNN0	178	K	uncharacterized protein LOC107820987	1	LOC107820987								1	0.0290387	60.161	EQAIK(1)DLQDLER	3	0.30011	1
A0A1S4CWX7	87	K	40S ribosomal protein S7	1	LOC107823503															1	0.0121581	97.565	ELEK(1)K(1)FSGK	2	-0.16041	1
A0A1S3YDE5	707	K	Coatomer subunit beta	1	LOC107774878	1	0.0278815	48.351	HATGEFVK(1)DENDANK	3	-0.044111	1
A0A1S4DGI2	79	K	syntaxin-132-like isoform X2	1	LOC107829653	0.506629	0.0267832	47.222	DANEESK(0.999)SVTK(0.494)ASAMK(0.507)AIR	3	0.045021	1
Q75ZE3	148	K	14-3-3 c-2 protein	1	14-3-3	1	0.000314281	141.37	K(1)EAAESTLTAYK	2	-1.0627	2
A0A1S4DA65	27	K	ubiquitin-NEDD8-like protein RUB2	1	LOC107827608															1	2.59039e-14	157.37	TITLEVESSDTIDNVK(1)AK	2	-0.34788	3
A0A1S4ATK0	95	K	MLP-like protein 423	1	LOC107801079								1	2.74495e-06	110.35	TVVYSVIDGETMK(1)YYK	2	-3.2515	3
A0A1S3ZXI9	341	K	protein QUIRKY-like	2	LOC107791490								0.999992	5.44233e-05	103.13	DKDLLK(1)DDFVGLCR	3	0.92141	1	0.989905	0.0320943	54.859	DK(0.01)DLLK(0.99)DDFVGLCR	3	0.63941	1
A0A1S4DHU6	123	K	40S ribosomal protein S10-1-like	1	LOC107829891															1	0.0218823	58.461	SAK(1)PLGRPMGGPPGDRPR	3	-0.15984	2
A0A1S4DEV5	854	K	transducin beta-like protein 3	3	LOC107829068	0.999948	0.0261172	75.738	EK(0.002)RSSK(0.998)K(1)R	3	0.15872	1	0.996332	0.0183476	68.224	EK(0.184)RSSK(0.819)K(0.996)R	3	-0.16561	1	0.98947	0.0302299	82.279	EK(0.19)RSSK(0.82)K(0.989)R	3	-0.31871	1
P27494	42	K	"Chlorophyll a-b binding protein 36, chloroplastic"	3	CAB36	1	0.00120718	81.606	TVK(1)SAPQSIWYGEDRPK	3	0.94283	2	1	4.58965e-09	123.92	TVK(1)SAPQSIWYGEDRPK	3	1.0406	2	1	0.00200065	79.92	TVK(1)SAPQSIWYGEDRPK	3	-0.31592	2
A0A1S4D9A2	256	K	elongation factor 1-gamma 2-like isoform X1	1	LOC107827359								0.768161	2.3816e-06	101.08	KEEPKFEEEEEAPK(0.232)PK(0.768)AK	4	0.28131	1
Q9FSF0	111	K	Malate dehydrogenase	3	MD1	1	0.00527509	82.651	NVSIYK(1)SQASALEK	2	1.4799	1	1	0.00743861	85.976	NVSIYK(1)SQASALEK	2	0.44859	2	1	4.87796e-08	135.81	NVSIYK(1)SQASALEK	2	1.4836	2
A0A1S4A2D0	51	K	nuclear transport factor 2-like	3	LOC107793005	1	0.000140222	86.179	IQGAQHIVAK(1)LTSLPFQQCK	4	0.099205	5	1	5.0758e-06	91.926	IQGAQHIVAK(1)LTSLPFQQCK	3	-0.3625	3	1	0.000550453	73.918	IQGAQHIVAK(1)LTSLPFQQCK	4	-0.079936	2
A0A1S4DHV3	730	K	phosphoenolpyruvate carboxylase	2	LOC107830003								1	0.0318455	53.493	SIVFK(1)EPR	3	0.83776	1	1	0.0344808	48.794	SIVFK(1)EPR	3	0.64748	1
A0A1S4BST6	166	K	vesicle-associated membrane protein 722-like	3	LOC107811510	1	1.16103e-07	108.18	IELLVDK(1)TENLHHQAQDFR	4	0.4768	2	1	6.70326e-09	107.65	IELLVDK(1)TENLHHQAQDFR	3	-0.40002	4	1	1.53575e-06	92.439	IELLVDK(1)TENLHHQAQDFR	3	-0.95049	3
A0A077DCK9	43	K	Carbonic anhydrase	1	LOC107821152															1	2.02856e-09	157.37	LLSEK(1)NELEDAAVAK	2	0.62224	6
A0A1S3XT86	289	K	NPL4-like protein 1	1	LOC107768545	0.983222	0.0298864	56.799	EGWFETEVNK(0.983)DEVIDPK(0.017)LSK	3	1.272	1
A0A1S3YWW8	50	K	peroxisomal membrane protein 11-4-like	2	LOC107780761								0.999877	0.00302484	73.498	LLTEEEESK(1)ETEGEIKK	3	0.72319	1	0.998388	0.00734746	66.809	LLTEEEESK(0.998)ETEGEIK(0.002)K	3	1.9008	1
W0TY26	168	K	Sucrose transporter	2	SUT1	1	0.00727773	66.023	ALLADLSGGK(1)AGR	3	-0.79976	1								1	0.00468595	69.846	ALLADLSGGK(1)AGR	3	-1.3039	2
A0A1S4BAT9	291	K	glutamate--glyoxylate aminotransferase 2	3	LOC107806358	1	0.000223059	77.221	ELQLVSFHTVSK(1)GYWGECGQR	4	0.52287	4	1	5.4797e-07	90.729	ELQLVSFHTVSK(1)GYWGECGQR	3	-0.061581	2	1	1.45787e-11	105.68	ELQLVSFHTVSK(1)GYWGECGQR	4	-0.49285	4
A0A1S3Y169	111	K	hypersensitive-induced response protein 1-like isoform X2	1	LOC107771030	1	0.0335601	61.649	ASVPK(1)LNLDNVFEQK	3	-0.015873	1
A0A1S3YZU3	4	K	Plasma membrane ATPase	3	LOC107781513	1	0.0190944	95.273	GEK(1)PEVLDAVLK	2	-0.011709	1	1	0.000837059	98.407	GEK(1)PEVLDAVLK	2	0.22013	2	1	0.00286944	82.774	GEK(1)PEVLDAVLK	2	0.13797	1
A0A1S4BXY1	667	K	receptor-like protein kinase FERONIA	3	LOC107813068	1	0.0249717	51.643	TTNILLDEK(1)WVAK	3	0.14776	1	1	0.00374525	95.854	TTNILLDEK(1)WVAK	2	0.32805	3	1	0.0100635	96.464	TTNILLDEK(1)WVAK	2	-0.41579	2
A0A1S3XER3	80	K	"pyruvate kinase, cytosolic isozyme-like"	2	LOC107764308	1	0.0328656	68.536	GGTTAK(1)LVAK	2	0.28545	1	1	1.05522e-07	136.96	GGTTAK(1)LVAK	2	-0.63291	1
A0A1S4CED6	10	K	uncharacterized protein DDB_G0283697-like	2	LOC107818148	0.774412	0.0290643	86.882	PSEDSK(0.226)PVK(0.774)K	2	0.54764	1	0.977441	0.03355	81.525	PSEDSK(0.023)PVK(0.977)K	2	0.40353	1
A0A1S3Z9L4	359	K	Non-specific serine/threonine protein kinase	1	LOC107784517								1	0.0344278	44.925	TIISK(1)LEDVAK(1)RLK(1)LK	3	-2.5088	1
A0A1S4A9Y6	767	K	Cellulose synthase	3	LOC107795298	1	0.0020695	67.994	EAIHVISCGYEDK(1)TEWGK	3	1.5074	1	1	0.00420573	60.062	EAIHVISCGYEDK(1)TEWGK	3	-0.54277	2	1	0.00742832	54.412	EAIHVISCGYEDK(1)TEWGK	3	1.0764	3
A0A1S4B2J7	563	K	heat shock cognate 70 kDa protein 2	1	LOC107803885								1	3.0676e-154	247.13	NTVK(1)DEK(1)IASK	3	-0.21274	3
A0A140G1X7	652	K	Protein TIC 214	1	ycf1								0.999655	0.0348116	58.274	K(0.996)SIGIK(0.005)EISK(1)K	3	-1.3764	1
A0A1S4CGC2	147	K	phosphate transporter PHO1 homolog 9-like	1	LOC107818714															1	0.0153055	61.409	QMNALIALRIK(1)VDK	3	-2.9533	1
A0A1S4ATN8	56	K	T-complex protein 1 subunit eta	1	LOC107801176								1	0.0165907	45.844	LIHDEK(1)GNTTISNDGATIMK	3	-2.022	2
A0A1S4CYS2	374	K	"inner membrane protein PPF-1, chloroplastic-like"	1	LOC107824065															0.962049	0.0258865	69.825	QLK(0.962)EDEK(0.137)K(0.901)K	2	-0.98783	1
A0A1S3Y064	169	K	ras-related protein RABF2a-like	3	LOC107770679	1	0.0144366	54.859	TASNVNDIFYEIAK(1)R	3	0.7069	1	1	0.000113178	102.15	TASNVNDIFYEIAK(1)R	3	0.068608	1	1	0.0119845	61.265	TASNVNDIFYEIAK(1)R	3	0.16456	1
A0A1S3ZXY2	650	K	cell division cycle protein 48 homolog isoform X2	1	LOC107791620	1	3.16897e-05	89.011	ALAK(1)YTQGFSGADITEICQR	3	-0.68852	1
A0A1S3YUB5	247	K	E3 ubiquitin-protein ligase RING1-like	1	LOC107779647															1	0.0126959	61.78	QMPCK(1)HIYHK	3	-0.56696	1
I2FJN7	311	K	Polyadenylate-binding protein	2	PABP								1	0.00182089	108.72	FEQTAK(1)EAVDK	2	1.3463	3	1	0.00145066	98.902	FEQTAK(1)EAVDK	2	0.57576	2
A0A1S4BJ28	325	K	"probable alpha,alpha-trehalose-phosphate synthase [UDP-forming] 7 isoform X3"	2	LOC107808783								1	0.00158595	92.943	VGELK(1)QQFEGK	3	-0.29889	1	1	0.0025815	101.71	VGELK(1)QQFEGK	2	-1.2576	2
A0A1S3YYG4	30	K	vacuolar protein sorting-associated protein 32 homolog 2-like	1	LOC107781048															1	0.0285725	53.211	LNEHLENLEK(1)K	3	-2.8238	1
Q06BK4	5	K	Water channel protein	3	LOC107778528	1	1.30012e-06	138.02	AENK(1)EEDVK(1)LGANK	2	-1.0875	4	1	3.12885e-22	160.53	AENK(1)EEDVK(1)LGANK	3	0.29696	5	1	3.23394e-09	135.94	AENK(1)EEDVK(1)LGANK	2	-1.6388	3
A0A1S4BKB7	8	K	uncharacterized protein LOC107809231 isoform X2	1	LOC107809231	0.550998	0.0278389	48.513	EK(0.225)K(0.225)DTGK(0.551)FSTEK	2	-0.71602	1
A0A1S4AAD5	54	K	protein transport Sec1a-like	1	LOC107795470	1	0.0225305	64.103	VTVK(1)VMSSTCK	2	-4.2692	1
A0A1S3XGK4	544	K	heat shock cognate protein 80-like	2	LOC107764955	1	0.0144687	65.465	FEGLCK(1)VIK	3	0.14496	1								1	0.0139192	61.679	FEGLCK(1)VIK	3	0.054807	1
A0A1S3ZC02	8	K	protein disulfide-isomerase 5-3-like	3	LOC107785202	1	0.0163144	66.351	LK(1)SVDFYR	3	0.044983	1	1	0.0159995	79.713	LK(1)SVDFYR	3	-0.28025	1	1	0.0315825	51.193	LK(1)SVDFYR	3	-0.7376	1
A0A1S3ZXY2	678	K	cell division cycle protein 48 homolog isoform X2	2	LOC107791620	1	0.0346562	47.228	ENIEK(1)DIER	3	-0.71264	1	1	0.0300297	81.017	ENIEK(1)DIER	2	0.78115	1
A0A1S4B881	220	K	luminal-binding protein	1	LOC107805460	1	2.58352e-06	104.16	IINEPTAAAIAYGLDK(1)K(1)GGEK	3	1.1959	4
A0A1S3ZN92	333	K	DNA damage-inducible protein 1	2	LOC107788650								1	0.000918541	71.143	FAK(1)EASSSGTQATSGAK	3	0.7371	1	1	0.000184576	86.005	FAK(1)EASSSGTQATSGAK	3	-0.22858	1
A0A1S4CHU7	454	K	vacuolar protein-sorting-associated protein 11 homolog	3	LOC107819023	1	0.0235376	50.534	LNEFIK(1)SEDGVGEQK	3	-0.18145	2	1	0.000150285	100.4	LNEFIK(1)SEDGVGEQK	3	-0.36358	1	1	0.00504726	63.31	LNEFIK(1)SEDGVGEQK	3	-0.75494	2
A0A1S4C9D4	913	K	ubiquitin-activating enzyme E1 1-like	1	LOC107816375															0.94859	0.0238513	67.952	NYSIPEVDK(0.051)LK(0.949)AK	3	-1.3392	1
P93769	441	K	Elongation factor 1-alpha	1	tel1															1	0.0272714	59.975	DPTGAK(1)VTK(1)AAQK	3	0.26926	1
A0A1S3X9D6	86	K	Nucleoside diphosphate kinase	1	LOC107762688	1	5.56247e-09	107.62	K(1)LIGATNPLESAPGTIR	2	0.1571	3
A0A1S3Y9T1	136	K	uncharacterized protein At5g39570-like	3	LOC107774073	1	0.00179933	74.793	K(1)SEYEEPASEYGSGYGR	3	-0.46701	1	1	0.000353363	86.222	K(1)SEYEEPASEYGSGYGR	3	0.32948	1	1	6.40052e-05	92.474	K(1)SEYEEPASEYGSGYGR	3	0.82388	1
A0A1S4B7E4	110	K	ethylene-responsive transcription factor 5-like	1	LOC107805279															0.961341	0.0208618	56.774	K(0.961)TEESK(0.039)TEEPK(1)TEESK	3	-0.33618	1
A0A1S4BRD0	617	K	5-methyltetrahydropteroyltriglutamate-- homocysteine methyltransferase-like	1	LOC107811094								1	5.35449e-05	98.077	K(1)AEHAFYLNWAVHSFR	3	1.0657	5
A0A1S3Y0V1	227	K	S-adenosylmethionine synthase	3	LOC107770931	1	4.11576e-05	119.46	YLDEK(1)TIFHLNPSGR	2	-1.5979	3	1	6.79522e-08	112.67	YLDEK(1)TIFHLNPSGR	2	-0.40117	5	1	1.95244e-05	105.99	YLDEK(1)TIFHLNPSGR	3	-0.22504	2
A0A1S4AQF4	64	K	uncharacterized protein LOC107800282	1	LOC107800282	0.997642	0.0265569	55.899	PK(0.999)ASYSFK(0.003)MDDK(0.998)RK	3	-1.4474	1
A0A1S3ZHB8	130	K	"oxygen-evolving enhancer protein 1, chloroplastic-like"	1	LOC107786842								0.934483	3.69404e-14	90.778	GTGTANQCPTIDGGVESFAFK(0.066)PGK(0.934)YNAK	4	-0.011316	1
A0A1S4DHL0	313	K	probable LRR receptor-like serine/threonine-protein kinase At5g10290	1	LOC107830000								1	0.00265793	95.618	GVLNDSTK(1)VAVK	2	-0.19565	1
A0A1S4B6T0	78	K	elongation factor 2-like	1	LOC107805110															1	0.0261504	73.665	DLYVK(1)NVQR	3	-0.53655	1
A0A1S4CHQ3	42	K	vesicle transport v-SNARE 13-like	2	LOC107818974								1	1.96273e-06	117	VSEIK(1)AGLDDAEALIR	2	1.2024	3	1	1.02066e-05	100.23	VSEIK(1)AGLDDAEALIR	3	1.1009	1
A0A1S4AQ81	54	K	remorin-like	3	LOC107800107	1	8.69331e-09	134.06	AIVAPALPPPEQVK(1)EK	2	-0.29309	4	1	5.53639e-19	146.59	AIVAPALPPPEQVK(1)EK	2	0.39706	4	1	1.1636e-11	143.05	AIVAPALPPPEQVK(1)EK	2	0.039392	5
A0A1S4C3B8	199	K	"phenylalanine--tRNA ligase alpha subunit, cytoplasmic-like"	2	LOC107814720	1	0.0107195	102.97	ELEFK(1)EYNFSAK	2	-1.1376	1	1	0.00508739	95.273	ELEFK(1)EYNFSAK	2	3.4559	1
A0A1S4DN41	154	K	glucomannan 4-beta-mannosyltransferase 9-like isoform X2	1	LOC107831575	1	0.00765116	97.635	WASK(1)GINIK	2	-0.041123	1
A0A1S4ACF1	67	K	1-aminocyclopropane-1-carboxylate oxidase-like	1	LOC107796076								1	0.0156341	109.79	FK(1)EMVASK	2	-0.40111	1
A0A1S4C2N5	107	K	"alpha-1,4-glucan-protein synthase [UDP-forming] 1"	1	LOC107814424								1	0.00146563	82.449	YIYTIDDDCFVAK(1)DPSGK	2	-0.83733	1
A0A1S3Y5V8	152	K	60S acidic ribosomal protein P0	1	LOC107772468								1	0.00129454	71.286	INK(1)GTVEIITPVELIK	3	0.63469	1
A0A1S3Y115	339	K	uncharacterized protein LOC107771013 isoform X2	1	LOC107771013	1	0.025861	52.937	MLK(1)K(1)EHK(1)K	2	2.8494	2
A0A1S3XQE7	303	K	uncharacterized protein LOC107767636 isoform X1	1	LOC107767636															1	0.0190369	67.113	RICK(1)TCGWK(1)K	3	4.2837	1
A0A1S4C0C1	33	K	ubiquitin-40S ribosomal protein S27a-like	1	LOC107813709								1	1.92086e-23	143.25	IQDK(1)EGIPPDQQR	2	-0.1769	60
A0A1S4A789	138	K	1-aminocyclopropane-1-carboxylate oxidase homolog	1	LOC107794476	1	0.0257237	52.862	GARRFFEQDIEIK(1)K(1)QYYHR	3	1.2779	1
A0A1S4B126	123	K	ras-related protein RABE1a	3	LOC107803437	1	0.000115113	93.495	NIEQHASDNVNK(1)ILVGNK	3	-0.046469	1	1	0.00195362	77.027	NIEQHASDNVNK(1)ILVGNK	3	1.8972	2	1	0.000515879	78.166	NIEQHASDNVNK(1)ILVGNK	3	0.21074	1
A0A1S3X810	74	K	signal peptidase complex catalytic subunit SEC11A-like	1	LOC107762203								1	0.00256434	71.513	GDILFLHMSK(1)DPIR	3	0.996	1
A0A1S4BST6	93	K	vesicle-associated membrane protein 722-like	1	LOC107811510								0.999109	0.0355223	63.727	VK(0.001)DDFVSK(0.999)YGGGK	3	0.42229	1
A0A1S3XNM8	322	K	PHD finger protein MALE MEIOCYTE DEATH 1-like	1	LOC107767068								1	0.0240355	55.335	NAAPNK(1)SEGK(1)EK(1)SVR	2	3.1355	1
A0A1S4D459	154	K	thioredoxin-1-like	2	LOC107825796	1	0.0276246	50.108	SIPTVMIFK(1)DGEK	3	0.92981	1								1	0.0354228	48.527	SIPTVMIFK(1)DGEK	3	1.0568	1
A0A1S4ALM3	11	K	ubiquitin-40S ribosomal protein S27a-like	1	LOC107799069	1	6.4951e-142	273.01	TLTGK(1)TITLEVESSDTIDNVK	3	-2.3562	6
A0A1S4AJY0	142	K	uncharacterized protein LOC107798461 isoform X1	1	LOC107798461	1	0.0269478	47.68	LLTEK(1)PDPFVMLPIPFEPQK	4	1.4736	1
A0A140G1S3	334	K	Ribulose bisphosphate carboxylase large chain	2	rbcL	1	5.91549e-05	91.889	MSGGDHIHSGTVVGK(1)LEGER	3	-0.73135	4								1	0.000179358	76.573	MSGGDHIHSGTVVGK(1)LEGER	3	0.96817	2
A0A1S3XKM0	166	K	Glutamine synthetase	3	LOC107766022	1	0.000221074	75.945	GGNNILVICDAYTPAGEPIPTNK(1)R	3	-0.35536	1	1	3.10823e-25	131.35	GGNNILVICDAYTPAGEPIPTNK(1)R	3	0.24339	4	1	0.000563243	66.31	GGNNILVICDAYTPAGEPIPTNK(1)R	3	-0.027957	2
Q75ZE5	144	K	14-3-3 a-1 protein	2	14-3-3	1	0.0025268	97.463	K(1)EAAENTLSAYK	2	-0.037624	1	1	6.79015e-07	131.06	K(1)EAAENTLSAYK	2	1.5061	5
A0A1S4C841	90	K	probable ADP-ribosylation factor GTPase-activating protein AGD14 isoform X3	3	LOC107815984	1	0.000143166	170.89	VIYLK(1)DWDTQR	2	0.34879	4	1	1.7575e-18	154.84	VIYLK(1)DWDTQR	2	0.26904	4	1	7.62001e-05	155.53	VIYLK(1)DWDTQR	3	0.44984	4
A0A1S3Y0V1	364	K	S-adenosylmethionine synthase	3	LOC107770931	1	0.000472293	100.69	FLK(1)TAAYGHFGR	3	-0.44163	1	1	0.00431028	75.819	FLK(1)TAAYGHFGR	3	-0.38625	2	1	0.000169431	112.94	FLK(1)TAAYGHFGR	2	-2.0833	2
A0A1S3X5I0	57	K	Carbonic anhydrase	2	LOC107761423	1	0.00140694	97.957	QLTAELEGAGGK(1)K	3	0.32752	3	1	0.000505964	113.99	QLTAELEGAGGK(1)K	2	-0.036	2
A0A1S4B6P4	5	K	pentatricopeptide repeat-containing protein At3g51320-like isoform X2	1	LOC107804999	1	0.0246871	42.425	NEGK(1)SVHGSLIK	3	1.2329	1
Q9M6E6	300	K	Polyadenylate-binding protein	3	PABP	1	0.00400448	96.23	FEQSAK(1)EAVDK	2	-0.08693	2	1	0.00886921	92.19	FEQSAK(1)EAVDK	2	0.11557	2	1	0.0034187	108.72	FEQSAK(1)EAVDK	2	0.47413	2
A0A077DCK9	53	K	Carbonic anhydrase	1	LOC107821152															0.999998	0.000932001	81.656	LLSEKNELEDAAVAK(1)IR	4	0.31573	1
P68173	464	K	Adenosylhomocysteinase	1	SAHH															0.999886	0.00555808	52.769	LSK(1)DQADYISVPVEGPYKPAHYR	4	1.6139	1
A0A1S4DBQ6	67	K	Glyceraldehyde-3-phosphate dehydrogenase	1	LOC107828122								0.582004	0.00330015	96.866	VK(0.582)DEK(0.418)TLLFGEK	3	-0.20838	1
A0A1S3WZX1	96	K	elongation factor 1-beta-like	2	LOC107759618								0.999941	0.0210808	52.192	EAAK(1)AADDDDDDDIDLFGEETEEEKK	3	-0.31479	1	0.999999	6.15025e-05	68.97	EAAK(1)AADDDDDDDIDLFGEETEEEKK	3	-1.5349	1
A0A1S4BCZ9	35	K	RNA-directed DNA polymerase homolog	1	LOC107806946	1	0.0304497	55.806	K(1)DHFPFPFIDR	3	-3.892	1
A0A1S4A931	197	K	uncharacterized protein LOC107795086	1	LOC107795086															1	0.0273485	65.295	MDVPK(1)K(1)EMSLALR	2	-1.3412	1
A0A1S4BEY9	28	K	Histone H2A	2	LOC107807559								1	0.000764347	101.56	SSK(1)AGLQFPVGR	3	-0.7384	1	1	0.00309401	77.74	SSK(1)AGLQFPVGR	3	-2.3519	2
A0A1S3Y0V1	331	K	S-adenosylmethionine synthase	3	LOC107770931	1	0.000176147	166.11	IPDK(1)EILNIVK	3	0.30454	5	1	7.16907e-09	136.27	IPDK(1)EILNIVK	3	-0.11305	4	1	0.00427493	188.27	IPDK(1)EILNIVK	3	-0.21168	4
A0A1S4A938	604	K	probable LRR receptor-like serine/threonine-protein kinase At1g67720	3	LOC107795092	1	0.00600198	64.798	K(1)VGSGGFGVVYYGK	3	-0.44783	1	1	0.0227393	65.374	K(1)VGSGGFGVVYYGK	2	0.25549	1	1	0.0164209	72.898	K(1)VGSGGFGVVYYGK	2	0.40391	2
A0A1S4DRK4	8	K	40S ribosomal protein S20-2-like	3	LOC107832707	1	2.26248e-15	124.77	AAYAAMK(1)PTK(1)PGLEEPQEQIHK	3	-0.34218	13	1	2.53761e-36	153.25	AAYAAMK(1)PTK(1)PGLEEPQEQIHK	3	-0.70772	10	1	1.16008e-21	166.3	AAYAAMK(1)PTK(1)PGLEEPQEQIHK	4	0.23327	17
A0A1S4DH22	139	K	uncharacterized protein LOC107829717	1	LOC107829717								0.99987	0.00822703	93.598	KFAK(1)ESAGK	2	3.1089	1
A0A1S4DFR5	66	K	dnaJ protein homolog isoform X2	2	LOC107829343								1	0.00493588	65.511	ELAQAYEVLSDPEK(1)R	3	0.63809	1	1	5.06209e-07	119	ELAQAYEVLSDPEK(1)R	3	1.5775	2
L0SQ48	227	K	Catalase	1	cat3															1	0.00304198	83.883	FHWK(1)PTCGVK	3	-0.66573	2
A0A1S3X170	578	K	Pescadillo homolog	1	LOC107760163	0.999008	0.0313755	68.463	K(0.998)LLDAMK(0.003)MGK(0.999)EK(1)K	2	0.33423	1
A0A1S4CJZ0	93	K	9-divinyl ether synthase-like	1	LOC107819622								1	0.0355889	43.548	TFPVLFDNSK(1)VEK	3	0.0084528	1
A0A1S3ZDB8	331	K	S-adenosylmethionine synthase	1	LOC107785513								1	0.000508599	95.981	TGTIPDK(1)DILALIK	3	0.26033	2
A0A1S3ZGQ7	431	K	"pentatricopeptide repeat-containing protein At1g20300, mitochondrial-like"	1	LOC107786636	0.931461	0.0290231	46.368	MK(0.024)ELK(0.043)CK(0.931)PNTVTYNILMK(0.001)MFADSK	3	-3.8775	1
A0A1S4DH21	150	K	uncharacterized protein LOC107829622	1	LOC107829622	1	0.0289636	59.294	SIIATTTVQK(1)K(1)EDPR	2	-2.3562	1
A0A1S4AP74	340	K	V-type proton ATPase subunit a	1	LOC107799704															1	0.00301483	93.181	K(1)CLVAEGWSPVFATK	2	-0.71858	1
A0A1S4BZH8	280	K	Phosphoglycerate kinase	1	LOC107813429															1	0.0013372	79.337	VSSK(1)IGVIESLLEK	3	0.1935	1
A0A1S4ANI5	400	K	transcription factor RF2a-like	1	LOC107799666								1	0.0340788	44.662	LPNSIARQMPMK(1)PNMFQK	2	1.957	1
A0A1S4DI21	242	K	uncharacterized protein LOC107830074 isoform X2	3	LOC107830074	1	0.00879048	93.556	QHIK(1)IWTQR	2	-0.28506	2	1	0.00830267	74.173	QHIK(1)IWTQR	2	-0.14106	3	1	0.00852496	70.056	QHIK(1)IWTQR	3	-0.28676	2
A0A1S4DCX7	238	K	LOW QUALITY PROTEIN: protein SUPPRESSOR OF MAX2 1-like	1	LOC107828496	1	0.0155541	67.169	NEIVNK(1)IK	3	-0.68396	1
A0A1S3YRT4	150	K	Glycine cleavage system H protein	1	LOC107778948															0.999996	0.00114001	78.419	VKPSSPSELESLMGSK(1)EYTK	3	-0.19026	2
Q5DKV0	284	K	Adenosine kinase isoform 1T	2	LOC107806529								1	0.0324337	54.343	LFPVIPLPK(1)EK	3	-0.4311	1	1	0.00643698	70.412	LFPVIPLPK(1)EK	3	-0.57172	2
A0A1S4DS10	384	K	uncharacterized protein LOC107832845	3	LOC107832845	1	1.92897e-05	100.77	EAGPDTMK(1)YLDDFHEQTR	4	0.33329	4	1	0.000195207	83.964	EAGPDTMK(1)YLDDFHEQTR	3	0.074094	5	1	3.29094e-10	118.31	EAGPDTMK(1)YLDDFHEQTR	4	-0.038486	8
A0A1S3XS79	277	K	2-hydroxyisoflavanone dehydratase-like	2	LOC107768141								1	0.000106521	124.12	FAEAVK(1)NSGWK	2	0.87741	2	1	0.0248316	90.614	FAEAVK(1)NSGWK	2	-0.20971	1
A0A1S3YZR9	89	K	HMG1/2-like protein	3	LOC107781188	1	0.0315799	72.607	APYIAK(1)AEK	2	0.61972	1	1	0.00962254	100.25	APYIAK(1)AEK	2	1.1618	1	1	0.0116148	108.57	APYIAK(1)AEK	3	0.35986	3
A0A1S3Z2H2	53	K	26S protease regulatory subunit 6A homolog	3	LOC107782228	1	0.0139614	79.283	TNLEVDSFK(1)EK	2	0.36881	2	1	0.00681452	83.226	TNLEVDSFK(1)EK	2	-0.37027	3	1	0.0309619	49.28	TNLEVDSFK(1)EK	3	0.202	1
A0A1S4AXP3	115	K	thioredoxin H4-1-like	2	LOC107802441	1	1.15141e-06	119.65	ATPTFFFLK(1)DSQQIDK	3	-0.45752	1	1	0.000797711	92.773	ATPTFFFLK(1)DSQQIDK	2	-0.51042	1
P41919	74	K	GTP-binding nuclear protein Ran-B1	3	RAN-B1	1	8.31751e-08	145.49	FYCWDTAGQEK(1)FGGLR	2	-0.10167	3	1	3.13299e-14	138.31	FYCWDTAGQEK(1)FGGLR	2	0.52635	3	1	7.37223e-23	162.7	FYCWDTAGQEK(1)FGGLR	2	-1.3351	2
A0A1S4DNE2	21	K	transcription initiation factor TFIID subunit 9-like	3	LOC107831428	1	0.0035869	98.943	TLLK(1)SMGVDDFEPR	2	-1.2192	1	1	0.000170494	105.03	TLLK(1)SMGVDDFEPR	2	0.47324	4	1	0.00134942	103.83	TLLK(1)SMGVDDFEPR	2	0.62279	4
A0A1S4B2J7	252	K	heat shock cognate 70 kDa protein 2	3	LOC107803885	1	0.000330734	131.82	LVNHFVQEFK(1)R	3	-0.24185	2	1	0.00115912	101.3	LVNHFVQEFK(1)R	3	1.7225	1	1	2.04705e-05	131.42	LVNHFVQEFK(1)R	2	-1.1037	2
A0A1S4BCE3	261	K	villin-4-like	2	LOC107806812	1	0.00023806	91.616	VQK(1)GQAEPLEIESLTR	3	-0.08242	1								1	0.00288229	86.411	VQK(1)GQAEPLEIESLTR	2	-1.2572	3
A0A1S4BJY8	226	K	importin-5-like isoform X2	1	LOC107809035	0.967618	0.0310702	66.19	LLMK(0.968)FAK(0.032)DEPR	2	0.83866	1
A0A1S4CAZ2	356	K	"GDP-mannose 3,5-epimerase 1-like"	1	LOC107817046	1	5.07877e-08	81.151	SQGVNIANYGSSK(1)VVGTQAPVELGSLR	3	0.41572	1
A0A1S4AAS9	8	K	V-type proton ATPase subunit E-like	2	LOC107795598								1	6.90556e-05	105.14	MNDADVSK(1)QIQQMVR	2	-0.3891	1	1	0.000944596	86.777	MNDADVSK(1)QIQQMVR	2	-2.3635	1
Q9LW96	14	K	Inositol-3-phosphate synthase	1		1	1.39424e-05	63.291	VESPNVK(1)YTESEIHSVYDYQTTELVHEEK	4	-0.93345	1
A0A1S4ALM3	48	K	ubiquitin-40S ribosomal protein S27a-like	2	LOC107799069	1	0.0284722	57.885	LIFAGK(1)QLEDDR	3	0.18861	1								1	0.0103654	84.31	LIFAGK(1)QLEDDR	2	0.81754	1
A0A1S3ZSJ9	68	K	40S ribosomal protein S5	1	LOC107790011								1	0.0347131	48.602	K(1)AQCPIVER	3	0.22459	1
A0A1S3XE60	110	K	Aldehyde dehydrogenase	1	LOC107764230															1	0.0155512	74.962	IFFTGSTK(1)VAK	3	-1.8765	1
A0A1S4DJU8	318	K	Elongation factor 1-alpha	3	LOC107830554	1	0.0274248	58.32	GYVASNSK(1)DDPAK	2	-2.3405	2	1	0.0189262	54.871	GYVASNSK(1)DDPAK	3	0.29798	1	1	0.00350618	104.24	GYVASNSK(1)DDPAK	2	0.11759	2
A0A1S4AGN4	189	K	"GDP-mannose 3,5-epimerase 1-like"	1	LOC107797479								1	0.00445056	81.676	HYNK(1)DFGIECR	2	-0.75062	3
A0A1S3XTB8	530	K	heat shock cognate 70 kDa protein 2-like	3	LOC107768506	1	0.000605648	109.29	MVQEAEK(1)YK	2	-0.36163	4	1	0.00276818	108.43	MVQEAEK(1)YK	2	3.0337	6	1	8.16456e-07	128.28	MVQEAEK(1)YK	2	0.84572	7
A0A1S4AQ81	101	K	remorin-like	1	LOC107800107															1	2.24185e-05	158.06	RLSLIK(1)AWEESEK	2	-0.85843	6
A0A1S3Y697	105	K	Glycine cleavage system H protein	1	LOC107772739								0.999439	0.017819	55.707	VK(0.001)PSSPSELESLMGSK(0.999)EYTK	4	0.013341	1
A0A1S4CRS0	385	K	IQ domain-containing protein IQM4-like	1	LOC107821865								1	0.0282076	51.949	PK(1)DIVINEK	3	-0.30638	1
A0A1S4BIV6	141	K	trihelix transcription factor ASIL2-like isoform X3	1	LOC107808728	1	0.0292095	63.181	VTEMIGVEK(1)SEIECR	3	3.1729	1
A0A1S4DN70	55	K	Vacuolar cation/proton exchanger	3	LOC107831601	1	0.0256569	54.776	K(1)VPCSIVR	3	2.8823	1	1	0.0243006	62.546	K(1)VPCSIVR	3	0.45596	1	1	0.0222818	65.246	K(1)VPCSIVR	3	3.1725	1
A0A1S3YTY5	317	K	uncharacterized protein LOC107779494	1	LOC107779494								1	0.000767536	80.508	FPQVCPCPK(1)ASFELGLK	3	-0.13536	1
A0A1S4A9Y6	240	K	Cellulose synthase	1	LOC107795298															1	0.0213373	56.416	YTEGK(1)GGDIEGTGSNGEELQMADDAR	3	-0.15584	1
A0A1S3ZQ23	41	K	FRIGIDA-like protein	1	LOC107789214	1	0.0234617	50.158	DSK(1)IPPPNPQLENLCK	3	0.1426	1
A0A1S4AQ81	77	K	remorin-like	1	LOC107800107															1	8.06005e-05	105.99	AAEPAEEK(1)K(1)EGSIDRDAVLAR	4	1.3335	4
A0A1S3Z6X4	54	K	ubiquitin receptor RAD23c-like	3	LOC107783652	1	0.00269826	107.09	VLK(1)DGTTLEENK	2	0.45807	3	1	1.56674e-18	151.79	VLK(1)DGTTLEENK	2	-0.19366	4	1	0.000226152	116.03	VLK(1)DGTTLEENK	2	0.96334	4
A0A1S4DJ51	62	K	Secretory carrier-associated membrane protein	1	LOC107830374															0.78976	0.00449164	66.289	NDATVDIPLDSMNDPK(0.79)K(0.21)R	3	-0.99071	1
A0A1S3XEA8	165	K	uncharacterized protein LOC107764191	1	LOC107764191								1	0.0299783	48.277	VTFAK(1)MK(1)LTALAK	3	2.7633	1
A0A1S4BK62	151	K	ran-binding protein 1 homolog c-like	3	LOC107809165	1	0.00109403	116.84	FASIENCK(1)SFK	2	0.29957	2	1	1.32987e-06	132.32	FASIENCK(1)SFK	2	-0.0026194	2	1	0.000714882	117.09	FASIENCK(1)SFK	2	0.50598	2
A0A1S4B8R4	117	K	V-type proton ATPase subunit H	1	LOC107805727	1	0.00546686	93.345	LLWK(1)GNWFIQEK	3	-1.2998	1
A0A1S4ADX9	207	K	uncharacterized protein LOC107796604	3	LOC107796604	0.597914	0.00414048	106.16	VVDDDLK(0.598)K(0.402)PAK	2	-0.43038	1	0.915688	0.00310268	104.82	VVDDDLK(0.916)K(0.084)PAK	3	0.42444	1	0.701927	0.001071	120.86	VVDDDLK(0.702)K(0.298)PAK	2	0.31296	1
A0A1S3ZLQ0	19	K	RNA-directed DNA polymerase homolog	1	LOC107788134															1	0.00739495	75.509	DMPK(1)RLSPKR	3	3.0976	1
A0A1S4CB27	44	K	Coatomer subunit delta	1	LOC107817076								1	0.0181809	61.186	LVGTGK(1)QHTYIETDNVR	3	-0.40102	1
A0A1S3ZAN8	149	K	Werner Syndrome-like exonuclease	1	LOC107784650	1	0.018057	50.108	RMAK(1)AVVGK(1)VMEK(1)PK	4	-1.878	1
A0A1S4D975	282	K	elongation factor 1-gamma 2-like isoform X2	1	LOC107827359	1	0.00722525	83.862	LYSNTK(1)TNFR	2	-0.36136	2
P35494	109	K	"2,3-bisphosphoglycerate-independent phosphoglycerate mutase"	3		1	0.000610576	77.506	LVDLALASGK(1)IYEGEGFK	3	0.42324	2	1	0.000654815	69.935	LVDLALASGK(1)IYEGEGFK	3	0.15863	2	1	1.30441e-05	90.379	LVDLALASGK(1)IYEGEGFK	3	-0.1348	3
A0A1S4CWV3	78	K	Fructose-bisphosphate aldolase	3	LOC107823486	1	3.03872e-06	122.97	GILAMDESNATCGK(1)R	3	0.039462	3	1	2.19491e-25	145.81	GILAMDESNATCGK(1)R	2	-0.38124	5	1	7.25259e-23	164.88	GILAMDESNATCGK(1)R	2	0.53567	3
O24132	178	K	Annexin	2	X671								1	0.0269199	85.807	ILHEK(1)ISDK	2	-1.8222	1	1	0.0265934	97.597	ILHEK(1)ISDK	3	-0.24851	2
A0A1S4C0C1	6	K	ubiquitin-40S ribosomal protein S27a-like	1	LOC107813709								1	1.40693e-30	165.63	MQIFVK(1)TLTGK	2	0.077455	11
A0A1S4B2J7	518	K	heat shock cognate 70 kDa protein 2	1	LOC107803885								1	1.08353e-13	141.34	LSK(1)EEIEK	2	0.45844	3
A0A1S4AQ81	190	K	remorin-like	1	LOC107800107															1	0.00980997	117.89	AEELAAK(1)YR	3	-0.14711	2
A0A1S3ZXY2	727	K	cell division cycle protein 48 homolog isoform X2	1	LOC107791620								1	0.00366134	83.877	K(1)YQAFAQTLQQSR	3	0.12361	1
A0A1S3ZXI9	464	K	protein QUIRKY-like	1	LOC107791490								0.944378	0.0115247	65.467	VQIGNQVLK(0.944)TK(0.056)PVQAR	4	0.51367	1
A0A1S3Z7Z9	167	K	phospholipase A(1) LCAT3-like	3	LOC107783961	1	0.00630367	91.961	LETAYK(1)ASGGR	3	0.54283	4	1	0.00224405	112.94	LETAYK(1)ASGGR	3	0.77121	4	1	0.00463793	108.56	LETAYK(1)ASGGR	3	0.38359	4
A0A1S4CS74	70	K	Phosphoglycolate phosphatase	1	LOC107822134								1	0.0349203	45.28	LVFVTNNSTK(1)SR	3	0.85565	1
A0A1S3YM56	220	K	Cysteine synthase	2	LOC107777625	1	1.28652e-12	116.61	LYGVEPVESAILSGGK(1)PGPHK	4	0.19002	2	1	4.79239e-16	118.05	LYGVEPVESAILSGGK(1)PGPHK	4	-0.30014	3
A0A1S4DQM5	220	K	inositol transporter 1-like	2	LOC107832142								0.633825	0.0160725	75.088	K(0.634)DK(0.366)AEAVAVLAK	3	0.06722	1	0.995079	0.00865207	88.101	K(0.995)DK(0.005)AEAVAVLAK	3	0.18565	1
A0A1S4ASP2	96	K	Peptidyl-prolyl cis-trans isomerase	3	LOC107801011	1	9.33445e-05	176.66	FADENFK(1)R	3	-0.34236	4	1	0.00757215	92.47	FADENFK(1)R	3	-0.089772	2	1	9.24648e-08	149.4	FADENFK(1)R	3	0.00019728	4
A9CM21	236	K	Voltage-dependent anion channel	3	NtVDAC2	1	0.00104693	85.176	VNSYGK(1)ASALIQHEWRPK	4	0.060525	1	1	3.68206e-09	118.55	VNSYGK(1)ASALIQHEWRPK	3	-1.3567	2	1	0.00716509	68.41	VNSYGK(1)ASALIQHEWRPK	3	-1.5664	1
A0A1S4CIH3	81	K	"PGR5-like protein 1A, chloroplastic"	1	LOC107819369								1	0.00299535	80.69	ILQYCSIDGK(1)GK	3	0.60471	1
A0A1S4C3E2	171	K	heavy metal-associated isoprenylated plant protein 3-like	2	LOC107814707	1	0.00869402	83.087	MK(1)GVENAEPDLK	2	-0.052786	3								1	0.00946842	99.669	MK(1)GVENAEPDLK	2	0.83813	2
A0A1S4C7W9	79	K	Ubiquitin carboxyl-terminal hydrolase	1	LOC107816171	1	0.000397128	85.203	IQQDSQTK(1)VQDPTSTVYFMK	3	-1.2511	2
A0A1S4AQ81	130	K	remorin-like	1	LOC107800107															1	0.00264936	118.23	K(1)ANLEAELK	2	0.020232	4
A0A0A8WJH9	3	K	Aquaporin PIP2 4b	3	LOC107824558	1	0.00107117	88.283	TK(1)EVEAVSEQPAEYSAK	2	-0.054386	2	1	0.00094448	75.91	TK(1)EVEAVSEQPAEYSAK	3	0.14113	1	1	8.24991e-15	137.52	TK(1)EVEAVSEQPAEYSAK	2	-0.43848	3
A0A1S4A347	154	K	HVA22-like protein	3	LOC107793218	1	1.78241e-14	121.26	YIQEHGTQAFEEMIHK(1)AEGER	4	0.44991	3	1	6.25929e-12	106.89	YIQEHGTQAFEEMIHK(1)AEGER	4	0.32534	2	1	1.62326e-06	88.945	YIQEHGTQAFEEMIHK(1)AEGER	4	-0.15417	2
A0A1S4CTL2	71	K	uncharacterized protein LOC107822425	1	LOC107822425								0.999461	0.0344102	54.343	K(0.999)LK(0.998)EARK(0.002)LINR	2	-2.4499	1
A0A140G1S3	32	K	Ribulose bisphosphate carboxylase large chain	3	rbcL	1	4.97865e-08	100.27	LTYYTPEYQTK(1)DTDILAAFR	3	1.2991	1	1	7.76177e-06	90.718	LTYYTPEYQTK(1)DTDILAAFR	3	0.47894	2	1	5.03149e-17	130.95	LTYYTPEYQTK(1)DTDILAAFR	3	0.031187	2
A0A1S4AKV3	283	K	serine/threonine-protein kinase D6PKL1-like	1	LOC107798812															0.946096	0.0122344	58.268	K(0.946)EK(0.054)MVPAESRSTTSQK	3	1.4227	1
A0A1S3ZUI8	452	K	heat shock cognate protein 80-like	1	LOC107790625								1	0.00232498	74.133	SGDEMTSLK(1)DYVTR	3	0.15472	1
A0A1S4ARV7	39	K	26S protease regulatory subunit 6A homolog	2	LOC107800555	1	0.0112787	75.213	ILK(1)EELQR	3	-0.57953	1	1	0.0108314	85.212	ILK(1)EELQR	3	-0.48096	1
A0A1S3ZJF3	33	K	uncharacterized protein At2g23090-like	1	LOC107787409								1	0.018887	95.815	K(1)AMSIQCK	2	-1.2581	1
A0A1S4ATQ9	415	K	beta-ureidopropionase-like	1	LOC107801282								1	0.0163321	50.376	HDFEPQVISDPLLYK(1)NA	3	0.11403	2
A0A1S3XBB7	441	K	casein kinase I-like isoform X4	1	LOC107763246															1	0.0149161	96.665	IDGALK(1)VGQK	2	1.8704	1
A0A1S4DCM5	5	K	probable aquaporin PIP-type pTOM75	2	LOC107828413	1	0.00728591	71.513	AENK(1)EEDVNLGANK	2	-2.0226	1								1	0.00105148	89.624	AENK(1)EEDVNLGANK	2	0.28626	1
A0A1S4ARB9	186	K	Adenosylhomocysteinase	1	LOC107800462	1	0.0350922	70.399	DGLK(1)TDPLK	2	-0.26862	1
A0A1S4C7U6	147	K	E3 ubiquitin-protein ligase At3g02290-like	3	LOC107816024	1	0.00321812	91.812	EYNK(1)SSVEFSTAK	2	0.032642	2	1	1.66265e-14	141.73	EYNK(1)SSVEFSTAK	2	0.10766	1	1	0.000193557	118.73	EYNK(1)SSVEFSTAK	2	-0.55662	2
A0A1S4CJG6	87	K	Peptidylprolyl isomerase	1	LOC107819712								1	0.0071448	57.973	FTLGQGQVIK(1)GWDQGIK	3	-0.83256	1
A0A1S4BSD4	98	K	cytochrome P450 86A22-like	1	LOC107811390								1	0.0193856	91.265	NLEHILK(1)VR	3	-0.17107	2
A0A1S4DII6	129	K	ras-related protein RABH1b	2	LOC107830228	1	0.0307762	87.754	TDLVEK(1)R	2	0.29009	1	1	0.0168771	80.229	TDLVEK(1)R	2	-0.27125	1
A0A1S4AEZ6	19	K	mannose-1-phosphate guanyltransferase alpha-B-like isoform X2	1	LOC107796939															1	0.013968	54.898	VVAVIMVGGPTK(1)GTR	3	0.0034936	1
A0A1S3X0Y5	164	K	"Ferredoxin--NADP reductase, chloroplastic"	2	LOC107760150	1	0.0233872	56.721	TVSLCVK(1)R	3	0.082942	1								1	0.0143085	77.923	TVSLCVK(1)R	3	0.36726	1
A0A1S4CZY0	28	K	calmodulin-5-like	3	LOC107824434	0.999922	3.99495e-11	106.23	EAFSLFDKDGDGCITTK(1)ELGTVMR	3	-0.43601	5	0.999999	8.88667e-12	100.76	EAFSLFDKDGDGCITTK(1)ELGTVMR	4	0.0082486	4	0.999998	6.03212e-21	114.87	EAFSLFDKDGDGCITTK(1)ELGTVMR	4	0.12825	4
A0A1S4C841	134	K	probable ADP-ribosylation factor GTPase-activating protein AGD14 isoform X3	3	LOC107815984	1	0.00962543	62.68	GK(1)MAEAENLSENR	3	-2.0982	1	1	0.000933566	96.866	GK(1)MAEAENLSENR	2	0.05044	2	1	0.0017053	85.837	GK(1)MAEAENLSENR	3	-1.0035	1
A0A1S4D985	52	K	serine--glyoxylate aminotransferase-like	1	LOC107827351	1	0.00959869	82.279	VLLEDVK(1)K	2	0.31251	1
Q03666	212	K	Probable glutathione S-transferase	1																1	0.00943255	67.897	VLEFVK(1)VLR	3	-1.0567	1
A0A1S4A5S5	299	K	"protein kinase 2B, chloroplastic-like"	1	LOC107794062															1	0.0154942	44.183	TVDNTK(1)VGVEQNLVDWAK(1)PYLGDK(1)RR	4	0.18753	1
A0A1S4CCD2	148	K	uncharacterized protein LOC107817327	1	LOC107817327								1	0.0196749	76.17	STK(1)GIMRAK	3	2.7746	1
A0A076L1Z5	105	K	Remorin 2	2	LOC107810092								0.999506	0.00398256	98.754	LK(1)KLEEQLEEK	3	0.61211	1	0.997143	0.00633874	93.561	LK(0.997)K(0.003)LEEQLEEK	3	0.1339	1
A0A1S4DLE3	378	K	methylthioribose kinase-like	3	LOC107831013	1	0.000449676	83.894	IVGVAHVEDFESIK(1)DAAK	3	-0.09624	1	1	2.68609e-10	123.92	IVGVAHVEDFESIK(1)DAAK	3	0.0032159	1	1	9.353e-06	92.633	RIVGVAHVEDFESIK(1)DAAK	4	-0.0074753	2
A0A1S4DBQ6	131	K	Glyceraldehyde-3-phosphate dehydrogenase	3	LOC107828122	0.998699	0.00779585	68.401	K(0.001)VVISAPSK(0.999)DAPMFVVGVNEK	3	-0.66918	1	0.995404	0.0174703	54.008	K(0.005)VVISAPSK(0.995)DAPMFVVGVNEK	3	0.65269	1	0.998896	0.0019841	73.809	K(0.001)VVISAPSK(0.999)DAPMFVVGVNEK	4	0.19403	2
A0A1S4C2S1	241	K	40S ribosomal protein S2-3-like	3	LOC107814537	1	0.000134134	98.592	TYGFLTPDFWK(1)ETR	3	0.77305	2	1	1.48216e-08	129.17	TYGFLTPDFWK(1)ETR	3	0.026728	2	1	1.77529e-05	112.08	TYGFLTPDFWK(1)ETR	3	0.4629	2
A0A1S4BHW2	29	K	eukaryotic translation initiation factor 1A-like	2	LOC107808437								1	0.000158887	92.773	ELVFK(1)EDGQEYAQVLR	3	0.86945	2	1	5.22439e-13	139.58	ELVFK(1)EDGQEYAQVLR	3	0.63652	1
A0A1S4CSN5	292	K	protein NRT1/ PTR FAMILY 6.4-like	3	LOC107822126	1	0.0061587	87.754	VPHTK(1)MLR	3	-0.2837	2	1	0.018614	66.429	VPHTK(1)MLR	3	-0.62609	2	1	0.0109017	126.28	VPHTK(1)MLR	2	0.061219	2
P93769	172	K	Elongation factor 1-alpha	1	tel1															1	0.00718229	74.537	YDEIVK(1)EVSSYLK	3	-0.42687	1
A0A1S4D6G2	394	K	"glutamate-1-semialdehyde 2,1-aminomutase, chloroplastic"	1	LOC107826543	1	0.0285829	48.044	K(1)TGHAMCGGYIR	3	-0.68096	1
A0A1S4AVF7	298	K	"putative quinone-oxidoreductase homolog, chloroplastic"	3	LOC107801723	1	0.00405722	77.644	HPLSK(1)AEDAWSR	3	0.30449	1	1	0.00133862	92.295	HPLSK(1)AEDAWSR	3	-0.13681	2	1	0.00241664	80.69	HPLSK(1)AEDAWSR	3	-0.59213	1
A0A1S4D975	256	K	elongation factor 1-gamma 2-like isoform X2	1	LOC107827359	0.832963	0.0145949	81.676	FEEEEEAPK(0.167)PK(0.833)AK	3	-0.19673	2
A0A1S3Z1F3	122	K	"ferredoxin-dependent glutamate synthase, chloroplastic-like"	3	LOC107781744	1	2.06037e-11	122.1	ASHGIVK(1)DALVALGCMEHR	4	-0.3809	2	1	8.24642e-09	106.57	ASHGIVK(1)DALVALGCMEHR	3	0.50092	3	1	0.0026793	61.561	ASHGIVK(1)DALVALGCMEHR	4	-0.38284	2
A0A1S4BST6	136	K	vesicle-associated membrane protein 722-like	2	LOC107811510								1	0.00888075	106.4	VK(1)AQVSEVK	2	-0.46332	1	1	0.0242805	99.013	VK(1)AQVSEVK	2	-1.1305	1
A0A1S3YD84	755	K	Calcium-transporting ATPase	1	LOC107774818								1	0.0037717	89.506	SDADATEPNLIEGK(1)R	3	-0.18106	2
I2G7N7	105	K	TIP protein	1	TIP								1	0.00303909	86.882	EAEGGK(1)HHHLF	3	-0.41219	1
A0A1S4CDB0	40	K	TOM1-like protein 2	2	LOC107817777								1	0.0202907	72.891	MK(1)ELFQGPNQADK	2	-0.7991	1	1	0.00914102	85.287	MK(1)ELFQGPNQADK	2	-1.4169	1
O24132	283	K	Annexin	3	X671	1	0.00141036	104.2	TIADEYQK(1)R	2	1.4	2	1	0.00618889	94.309	TIADEYQK(1)R	2	0.04542	2	1	0.0079715	109.11	TIADEYQK(1)R	2	1.1688	2
A0A1S4CT24	346	K	U-box domain-containing protein 33-like isoform X3	1	LOC107822250	0.9997	0.0320583	48.277	GK(0.022)EEANQMK(0.979)SK(1)LNK	3	0.059565	1
A0A1S4BMU6	346	K	protein GPR107-like	2	LOC107810012	1	0.033444	47.844	TDGK(1)AAVNLMK	3	-0.32024	1	1	0.0328191	48.188	TDGK(1)AAVNLMK	3	-0.18401	1
A0A1S4DR51	22	K	Hexosyltransferase	3	LOC107832564	1	0.00690748	72.848	HVTVLPAK(1)GFK	3	-0.01317	1	1	0.00175478	92.239	HVTVLPAK(1)GFK	3	0.2192	1	1	0.00221289	88.134	HVTVLPAK(1)GFK	3	-0.12185	1
A0A0S0N610	37	K	Tubulin beta chain	2	TUB1								1	0.0236077	67.326	YK(1)GTAAESDLQLER	2	0.63163	1	1	0.000908941	90.229	YK(1)GTAAESDLQLER	3	-0.050667	1
A0A1S3YQS0	569	K	Kinesin-like protein	1	LOC107778555								1	0.0114809	88.819	EMK(1)EDIDRK	2	-0.71561	1
A0A1S4AGN4	343	K	"GDP-mannose 3,5-epimerase 1-like"	1	LOC107797479								1	0.00540364	85.469	EK(1)SQGVNIANYGSSK	2	-1.6348	2
A0A1S3YYN8	547	K	patellin-3-like	3	LOC107780867	1	5.99213e-07	107.69	HTIEFPVTEK(1)TSLVWEAR	4	-0.074385	3	1	1.34353e-10	124.84	HTIEFPVTEK(1)TSLVWEAR	4	1.1304	3	1	8.57376e-13	127.49	HTIEFPVTEK(1)TSLVWEAR	4	0.33039	3
A0A1S3YKH3	161	K	"peroxiredoxin Q, chloroplastic-like"	2	LOC107777133								1	7.96736e-36	170	LPFTLLCDEGNK(1)VR	3	-0.046863	1	1	0.00140013	78.529	LPFTLLCDEGNK(1)VR	3	-0.20143	1
A0A1S4AV72	349	K	coatomer subunit alpha-1	3	LOC107801629	1	0.000349827	88.561	VYEYSTQK(1)ENQLIPIR	3	-0.98692	2	1	0.0281698	56.514	VYEYSTQK(1)ENQLIPIR	3	-0.70769	1	1	0.00616185	82.651	VYEYSTQK(1)ENQLIPIR	3	0.12076	1
A0A1S4B9X5	160	K	26S proteasome regulatory subunit RPN13-like isoform X2	1	LOC107806049	1	0.0283983	46.247	AGNLVSASMNTEASSDVTSSGPVK(1)LADLQR	3	-1.5149	1
Q40460	175	K	"Ribulose bisphosphate carboxylase/oxygenase activase 1, chloroplastic"	2		1	8.11298e-06	136.01	GQGK(1)SFQCELVFR	2	-0.1875	3								1	8.15503e-06	158.34	GQGK(1)SFQCELVFR	2	0.33024	5
A0A1S4A813	487	K	translation initiation factor IF-2-like	3	LOC107794768	1	0.00400453	96.229	LVVAYEELK(1)GK	2	0.15369	2	1	0.00106421	100.88	LVVAYEELK(1)GK	3	0.7587	2	1	0.00380109	97.734	LVVAYEELK(1)GK	2	0.057209	3
A0A1S4D8N6	267	K	putative pentatricopeptide repeat-containing protein At1g02420	1	LOC107827160								0.95514	0.0231185	60.161	EMEK(1)AFK(0.045)VVK(0.955)EMR	3	-1.3786	1
A0A1S4A9Y6	479	K	Cellulose synthase	2	LOC107795298								1	9.97981e-06	81.379	AQK(1)MPEEGWTMQDGTPWPGNNPR	3	1.693	3	1	0.0231541	40.197	AQK(1)MPEEGWTMQDGTPWPGNNPR	3	0.78559	1
A0A1S3ZXK0	76	K	eukaryotic initiation factor 4A-9-like	1	LOC107791448								1	0.00377773	56.488	GIVPFCK(1)GLDVIQQAQSGTGK	3	0.050568	1
A0A1S4D3E9	296	K	ubiquitin carboxyl-terminal hydrolase 12-like isoform X2	1	LOC107825543															1	0.00527601	79.489	VLCEK(1)LEDK	3	-0.29026	1
A0A1S4B745	8	K	pyridoxal 5'-phosphate synthase subunit PDX1	2	LOC107805188								1	0.0235833	70.685	MSDPQLIK(1)EIK	3	-0.68128	1	1	0.0232648	87.641	MSDPQLIK(1)EIK	3	-0.4963	1
A0A1S4ATK0	109	K	MLP-like protein 423	1	LOC107801079								1	0.00130981	96.673	GSLTVSPK(1)GDGSLVK	2	0.1445	1
A0A1S4ADW0	389	K	Plasma membrane ATPase	3	LOC107796542	1	3.6219e-07	101.16	VENQDAIDACMVGMLADPK(1)EAR	3	-0.98036	2	1	1.4574e-16	122.34	VENQDAIDACMVGMLADPK(1)EAR	3	-0.94546	2	1	1.01073e-05	85.062	VENQDAIDACMVGMLADPK(1)EAR	3	-0.72749	2
A0A0A8WK75	3	K	Aquaporin PIP2 6b	3	LOC107815182	1	3.82192e-27	203.74	SK(1)DVIEEGQTHQHGK	2	0.3121	4	1	1.67471e-81	204.17	SK(1)DVIEEGQTHQHGK	2	0.71729	6	1	4.51001e-11	169.58	SK(1)DVIEEGQTHQHGK	4	0.75301	6
A0A1S3Y7T8	219	K	sorbitol dehydrogenase	1	LOC107773322								1	0.00648173	81.95	K(1)LGADETVK	3	0.43428	1
A0A1S4BDK6	128	K	ubiquitin-conjugating enzyme E2 2 isoform X2	1	LOC107807136	1	0.00120476	99.375	MFSENK(1)R	2	0.73829	1
A0A1S4BS12	19	K	MLP-like protein 423	2	LOC107811017	1	0.00212097	91.123	TPADK(1)FWNSIR	2	-0.45856	3								1	0.00244926	85.924	TPADK(1)FWNSIR	3	0.21609	2
A0A1S4BWK5	57	K	NADP-dependent glyceraldehyde-3-phosphate dehydrogenase-like	3	LOC107812643	1	5.8737e-08	124.68	VQACTQEEVNK(1)VMEVAK	2	0.10213	4	1	8.05573e-16	135.55	VQACTQEEVNK(1)VMEVAK	2	-0.015996	3	1	4.81662e-12	126.91	VQACTQEEVNK(1)VMEVAK	2	0.32691	3
A0A1S3YEN2	79	K	golgin candidate 5-like	1	LOC107775258								1	0.0301865	40.475	TVTTLMTYLK(1)AK(1)AR	4	0.91426	1
A0A1S3Y9C0	378	K	la protein 1-like	2	LOC107773773								1	0.0159047	86.344	FENEGAAQK(1)AR	2	-0.87252	1	1	0.00537849	105.46	FENEGAAQK(1)AR	2	-0.4165	1
A0A1S4C1M4	716	K	uncharacterized protein LOC107814145 isoform X2	1	LOC107814145															1	0.0251708	52.79	LGK(1)EIWANMFK	3	-0.1699	1
A0A1S3X9H4	79	K	Nucleoside diphosphate kinase	2	LOC107762688								1	4.10254e-09	120.59	K(1)LIGATNPLESAPGTIR	2	-0.95781	3	1	3.94429e-11	127.32	K(1)LIGATNPLESAPGTIR	2	-0.2572	3
A0A1S4DLY5	157	K	Inositol-1-monophosphatase	1	LOC107831188								1	0.00280434	61.139	VSSQSELVK(1)ALLATEAGTK	3	0.29762	1
A0A1S4DHK7	388	K	9-divinyl ether synthase-like	3	LOC107829877	1	0.000441361	105.19	KDELIFGYQPLATRDPK(1)VFK	4	1.6224	6	0.999999	7.36968e-48	180.95	DPK(1)VFKNPEEFNADR	4	0.14175	7	0.999999	4.49131e-11	139.21	KDELIFGYQPLATRDPK(1)VFK	4	0.87034	5
A0A1S4BX25	81	K	uncharacterized protein LOC107812797	1	LOC107812797								0.589205	0.0349085	47.302	PRSPK(0.589)K(0.589)VK(0.822)CQDK	3	-1.2684	1
A0A1S3ZA42	582	K	FK506-binding protein 5-like isoform X2	1	LOC107784592								0.945331	0.00803913	69.456	VK(0.034)QSLVK(0.945)AK(0.51)K(0.51)AIIGK	2	-1.2057	1
Q75ZE3	101	K	14-3-3 c-2 protein	1	14-3-3	0.999588	0.00672038	70.197	SKIENELSK(1)ICDGILK	3	-1.0489	1
A0A1S4AF13	185	K	transcription initiation factor IIF subunit alpha-like	1	LOC107796896	0.99999	0.0336689	65.241	EDKAAFADVLK(1)R	2	1.4369	1
A0A1S3YZU3	421	K	Plasma membrane ATPase	3	LOC107781513	1	0.000885806	86.699	TALTYLDGEGK(1)MHR	3	-1.1966	2	1	4.28136e-05	113.07	TALTYLDGEGK(1)MHR	4	0.38202	2	1	0.00117528	95.428	TALTYLDGEGK(1)MHR	3	-1.693	2
A0A1S3ZXY2	34	K	cell division cycle protein 48 homolog isoform X2	1	LOC107791620	1	0.0127997	86.67	GDTILIK(1)GK	2	-0.23106	1
A0A1S4BEY9	132	K	Histone H2A	2	LOC107807559								0.944523	0.00471092	74.89	K(0.055)AGSGK(0.945)GDIGSASQEF	2	0.4051	2	0.535672	0.0147601	63.682	K(0.464)AGSGK(0.536)GDIGSASQEF	3	-0.33873	1
A0A1S3ZUI8	54	K	heat shock cognate protein 80-like	1	LOC107790625								1	0.0300297	81.017	FESLTDK(1)SK	3	-0.73477	2
A0A1S3YZU3	453	K	Plasma membrane ATPase	1	LOC107781513								1	0.00532028	76.843	VHAVIDK(1)FAER	3	-0.5114	1
A0A1S4B2J7	513	K	heat shock cognate 70 kDa protein 2	1	LOC107803885								1	1.06678e-26	172.23	NK(1)ITITNDK(1)GR	3	-0.19935	6
A0A1S3YMX4	555	K	"histone-lysine N-methyltransferase, H3 lysine-9 specific SUVH1-like"	2	LOC107777978	0.940845	0.0115713	59.673	MSQTGPK(0.01)ARVEVFK(0.941)TK(0.05)NR	2	-0.059446	2								0.915166	0.012304	63.062	MSQTGPK(0.018)ARVEVFK(0.915)TK(0.067)NR	2	0.50632	1
A0A1S4DHK7	407	K	9-divinyl ether synthase-like	1	LOC107829877															1	0.0288377	50.194	FVGDGEK(1)LLK	3	-1.1897	1
A0A1S4CPZ9	24	K	desiccation protectant protein Lea14 homolog	1	LOC107821400															0.999972	0.00014134	57.145	VTNMEK(1)PEATIMDVDVK(0.75)K(0.25)ISFDSISYHAK	4	-0.83145	1
A0A1S4AQJ5	8	K	ABC transporter A family member 1 isoform X4	1	LOC107800372															0.993916	0.0238045	55.314	MEKKEK(0.006)EK(0.994)EMR	3	-2.5638	1
A0A1S4DM16	146	K	4-coumarate--CoA ligase 2-like	2	LOC107831218	1	0.0151472	55.094	ASNAK(1)LIVTQSQYVDK	3	2.8647	1	1	0.0119426	54.412	ASNAK(1)LIVTQSQYVDK	3	0.60046	1
A0A1S4CDB0	114	K	TOM1-like protein 2	1	LOC107817777															1	0.00965562	66.152	IQYLGLVLLETIAK(1)NCEK	3	2.0415	1
A0A1S4D950	76	K	Protein pelota homolog	1	LOC107827364	1	0.00818689	62.287	VENVEYDK(1)EGSALR	3	2.2487	1
A0A1S3ZUI8	250	K	heat shock cognate protein 80-like	1	LOC107790625								0.855529	0.000912205	101.2	K(0.856)IK(0.144)EVSNEWSLVNK	3	0.23703	1
A0A1S3XR17	42	K	uncharacterized protein At3g28850-like	2	LOC107767590								1	1.54964e-23	153.14	ADNNK(1)VEDEEEQEEK	3	-0.63656	2	1	0.000513662	89.624	ADNNK(1)VEDEEEQEEK	3	-0.28428	1
A0A1S4ADF0	827	K	kinesin-like protein KCA2	1	LOC107796397															1	0.0104646	59.673	SPELQSIK(1)VSPVER	3	1.917	1
A0A1S3YRX7	111	K	probable protein phosphatase 2C 48 isoform X3	1	LOC107779152	1	0.0118264	68.787	LFENLK(1)K	2	-0.36659	1
P93356	130	K	LIM domain protein WLIM2	2	SF3								1	0.0066647	64.534	VTVENQSYHK(1)TCFK	3	0.96488	1	1	0.000101039	103.97	VTVENQSYHK(1)TCFK	3	0.42398	1
A0A1S4DA91	83	K	translationally-controlled tumor protein homolog	1	LOC107827662	1	0.00692329	98.04	LQEQPSFDK(1)K	2	-0.25558	1
A0A1S4ADW0	11	K	Plasma membrane ATPase	3	LOC107796542	1	7.30695e-06	105.14	AISLEEIK(1)NETVDLEK	3	0.69871	2	1	2.26714e-24	150.12	AISLEEIK(1)NETVDLEK	2	0.16188	4	1	4.6041e-09	184.51	AISLEEIK(1)NETVDLEK	3	1.3168	1
I7GVS5	567	K	Heat shock protein 70	3	NtHsp70	1	0.00466978	99.752	IASK(1)LPEADKK	3	-0.1999	2	1	0.00519312	108.35	IASK(1)LPEADKK	3	-0.043224	2	0.999944	0.0119941	85.924	IASK(1)LPEADKK	2	-0.45793	1
A0A1S4D312	5	K	Nascent polypeptide-associated complex subunit beta	1	LOC107825427															1	0.0285743	64.265	MNVEK(1)LR	2	-0.13218	1
A0A1S3ZUI8	263	K	heat shock cognate protein 80-like	1	LOC107790625								0.885646	1.17121e-19	121.13	EVSNEWSLVNK(0.886)QK(0.114)PIWMR	3	2.6053	3
A0A1S4BPW2	253	K	"trifunctional UDP-glucose 4,6-dehydratase/UDP-4-keto-6-deoxy-D-glucose 3,5-epimerase/UDP-4-keto-L-rhamnose-reductase RHM1-like"	1	LOC107810647								1	0.0118585	63.16	GEVGHVYNIGTK(1)K	3	0.62387	1
A0A1S3XVH5	277	K	protein QUIRKY-like	3	LOC107769036	1	0.00120225	108.9	VAPNK(1)DEVLGR	2	-0.22684	3	1	5.21949e-07	130.98	VAPNK(1)DEVLGR	2	0.20253	4	1	0.000372067	112.13	VAPNK(1)DEVLGR	2	0.1626	5
A0A1S4BAN5	809	K	Lipoxygenase	2	LOC107806327								0.999968	0.00581907	73.885	IIKMNNDK(1)K(1)LK	2	-1.5958	1	0.999401	0.000673456	100.88	IIK(0.001)MNNDK(0.999)K(1)LK	2	-2.3226	1
A0A1S4B5L4	271	K	"alpha-1,4-glucan-protein synthase [UDP-forming] 1-like"	1	LOC107804720								1	0.0341066	48.188	ASNPFVNLK(1)K	3	0.15703	1
A0A140G1X7	643	K	Protein TIC 214	1	ycf1								0.995579	0.0348116	58.274	K(0.996)SIGIK(0.005)EISK(1)K	3	-1.3764	1
P41919	137	K	GTP-binding nuclear protein Ran-B1	1	RAN-B1															1	0.00765791	79.474	AK(1)QVTFHR	3	-0.2462	1
Q75ZD6	146	K	14-3-3 h-1 protein	1	14-3-3															1	0.00143828	113.52	K(1)EAAENTLSAYK	3	1.148	2
A0A1S4DA65	48	K	ubiquitin-NEDD8-like protein RUB2	1	LOC107827608															1	1.04479e-11	169.21	LIFAGK(1)QLEDGR	3	-0.080051	195
A0A1S4ADW0	937	K	Plasma membrane ATPase	3	LOC107796542	1	0.00798949	89.679	GHVESVVK(1)LK	2	0.38879	1	1	0.00196498	99.788	GHVESVVK(1)LK	3	-0.25482	2	1	0.00552672	122.96	GHVESVVK(1)LK	3	-0.17849	3
Q9ZRD2	126	K	NTGP3	1	LOC107799203	1	0.0143121	49.076	EDK(1)QFFLDHPGAVPLTTAQGEELRK	4	0.7404	1
A0A1S3XCF3	413	K	nucleolar protein 56-like	2	LOC107763606								1	0.00480384	77.744	LDFYDK(1)GVAPR	3	-0.40242	1	1	0.0226084	54.343	LDFYDK(1)GVAPR	3	-0.49489	2
A0A140G1X0	52	K	Photosystem I iron-sulfur center	1	psaC								1	0.0198387	83.783	TEDCVGCK(1)R	2	-1.2265	1
A0A1S3YT65	147	K	plastid division protein PDV2-like	1	LOC107779470															1	0.0292116	64.476	AMVSDK(1)GYGAHLPSAR	3	2.0573	1
A0A1S4ADP2	139	K	UDP-glucose 6-dehydrogenase	2	LOC107796541	1	5.76508e-06	118.08	TAEAIEK(1)ILTHNSK	3	1.6427	1	1	3.01137e-09	113.53	TAEAIEK(1)ILTHNSK	3	0.85413	1
Q5DKV0	227	K	Adenosine kinase isoform 1T	3	LOC107806529	1	0.0121777	53.21	TFSK(1)VHGWETDNVEEIALK	3	0.78372	1	1	0.0208971	44.577	TFSK(1)VHGWETDNVEEIALK	4	0.90389	1	1	0.00782158	54.103	TFSK(1)VHGWETDNVEEIALK	3	0.26669	1
A0A1S4A2L9	187	K	serine-threonine kinase receptor-associated protein-like	2	LOC107793048	1	0.00572397	56.882	VVQTLETK(1)FPVTSAEVSQDGR	3	0.76536	1	1	0.0127326	59.339	VVQTLETK(1)FPVTSAEVSQDGR	3	-0.60185	1
A0A1S4CVF9	450	K	molybdate-anion transporter-like	1	LOC107823032	1	0.0304222	69.721	AEDWVAMK(1)ER	2	0.0061254	1
A0A1S3XGK4	263	K	heat shock cognate protein 80-like	2	LOC107764955	0.986636	2.08029e-06	105.14	EVSNEWSLVNK(0.987)QK(0.013)PIWMR	3	1.2193	3								0.932243	0.000516835	84.41	EVSNEWSLVNK(0.932)QK(0.068)PIWMR	4	-0.15579	2
A0A1S4A2I8	485	K	patellin-3-like	1	LOC107793044	1	0.00325503	77.221	HTIEFPVTEK(1)CSLVWEAR	3	-0.52845	1
A0A1S4D1H7	38	K	probable ubiquitin-conjugating enzyme E2 18	1	LOC107824880								1	0.0177073	61.691	HK(1)VTDNLQR	3	0.44094	1
A0A1S4BKX8	455	K	Cellulose synthase	3	LOC107809423	1	0.00845712	75.387	VQPSFVK(1)DR	3	-0.23959	1	1	0.0163714	63.076	VQPSFVK(1)DR	3	0.1441	1	1	0.01609	59.931	VQPSFVK(1)DR	3	0.71998	1
A0A1S3ZUI8	520	K	heat shock cognate protein 80-like	1	LOC107790625								0.992781	0.00574296	66.068	LVSATK(0.993)EGLK(0.007)LDESEDEKK	4	0.8762	1
A0A1S3Z0K4	129	K	Histone H2A	2	LOC107781461								1	0.019205	74.165	SLINK(1)SSK(1)E	2	1.3872	1	0.993299	0.00307185	122.96	SLINK(0.993)SSK(0.007)E	2	0.14386	2
A0A1S4AAI5	125	K	V-type proton ATPase subunit a	1	LOC107795468								1	0.00166319	63.302	LGELEAELIEINANGDK(1)LQR	3	0.18831	1
A0A1S4AMD6	209	K	plant UBX domain-containing protein 8-like isoform X4	1	LOC107799306	1	0.0149836	41.703	QSHLEDAQLAHAVSLSLK(1)TAEQEK	4	-0.019491	1
A0A1S4AG18	425	K	Glycosyltransferase	1	LOC107797233															1	0.0257315	51.727	ELMEGEK(1)GEGVR	3	1.0002	1
A0A0A8WHB3	15	K	Aquaporin PIP1 2b	1	LOC107779998	1	0.00503227	109.7	LGANK(1)YR	2	-0.42881	2
A0A1S4BWK5	46	K	NADP-dependent glyceraldehyde-3-phosphate dehydrogenase-like	3	LOC107812643	0.902974	0.00769593	74.793	K(0.097)TQYK(0.903)VQACTQEEVNK	3	-0.18085	1	0.967383	0.003843	81.01	K(0.033)TQYK(0.967)VQACTQEEVNK	3	0.19604	1	0.987121	0.0118556	66.068	K(0.013)TQYK(0.987)VQACTQEEVNK	3	0.04315	1
A0A1S3ZTS6	121	K	uncharacterized protein LOC107790405	1	LOC107790405	1	0.0125386	77.741	LEASK(1)GK	2	0.90352	1
A0A1S3ZZL0	238	K	enolase-like	1	LOC107792078								1	0.0197729	81.92	TAIEK(1)AGYTGK	2	1.558	1
A0A1S3Z6E6	117	K	V-type proton ATPase subunit H	1	LOC107783503								1	0.000553906	107.09	LLWK(1)GNWFIQEK	3	-0.14662	2
A0A1S3Z3W1	74	K	uncharacterized protein LOC107782494	1	LOC107782494								0.934371	0.0198221	62.732	NK(0.004)K(0.042)K(0.934)EDDLWNTMK(0.02)K	3	3.4057	1
L7UU40	8	K	26S protease regulatory subunit 8 homolog A-like	3	RPT6	1	2.92884e-05	122.96	ASADVEK(1)SR	2	0.31776	1	1	7.53693e-06	120.45	ASADVEK(1)SR	2	0.87648	1	1	0.00416854	104.05	ASADVEK(1)SR	2	1.4137	1
A0A1S3ZA42	584	K	FK506-binding protein 5-like isoform X2	1	LOC107784592								0.510107	0.00803913	69.456	VK(0.034)QSLVK(0.945)AK(0.51)K(0.51)AIIGK	2	-1.2057	1
A0A1S3Y115	340	K	uncharacterized protein LOC107771013 isoform X2	1	LOC107771013	1	0.025861	52.937	MLK(1)K(1)EHK(1)K	2	2.8494	2
A0A1S4D3E9	515	K	ubiquitin carboxyl-terminal hydrolase 12-like isoform X2	1	LOC107825543															1	0.00400324	86.772	FTK(1)YSNAYMLVYIR	3	0.84064	1
A0A1S4D9L7	85	K	protein PEROXIN-4 isoform X2	3	LOC107827478	1	0.000413784	79.332	IFHPNVHFK(1)TGEICLDILK	3	0.62397	1	1	0.00379438	56.746	IFHPNVHFK(1)TGEICLDILK	5	-0.64209	3	1	0.00182751	66.777	IFHPNVHFK(1)TGEICLDILK	3	0.15781	1
A0A1S4C0C1	27	K	ubiquitin-40S ribosomal protein S27a-like	1	LOC107813709								1	1.26358e-51	174.4	TITLEVESSDTIDNVK(1)AK	2	0.14024	2
A0A1S4B4M6	896	K	26S proteasome non-ATPase regulatory subunit 1 homolog	3	LOC107804491	1	4.93386e-13	111.56	AAGTESSSGAPSSGESMQVDTPAEK(1)K	3	0.94724	1	1	0.00113111	53.998	AAGTESSSGAPSSGESMQVDTPAEK(1)K	3	-0.072483	2	1	5.87955e-07	81.525	AAGTESSSGAPSSGESMQVDTPAEK(1)K	3	0.59897	4
A0A075F2H4	84	K	Ubiquitin-conjugating enzyme E2 36-like protein	3	Ubc13-2	1	0.000391185	114.86	IYHPNIDK(1)LGR	4	-0.037444	9	1	3.11148e-09	139.31	IYHPNIDK(1)LGR	2	-0.2047	2	1	0.000319769	117.14	IYHPNIDK(1)LGR	2	-0.41189	5
A0A1S4CSV1	242	K	transcription factor DICHOTOMA-like isoform X2	1	LOC107822169	0.994119	0.026069	43.68	LETAK(0.039)GPLK(0.972)K(0.994)K(0.994)GK	2	-4.2627	1
A0A1S3Y9T1	153	K	uncharacterized protein At5g39570-like	3	LOC107774073	1	0.00207763	68.243	K(1)SEYVEPVSEYGSGYGR	3	-0.071377	1	1	0.00660582	59.372	K(1)SEYVEPVSEYGSGYGR	3	-0.075961	1	1	1.01811e-05	97.502	K(1)SEYVEPVSEYGSGYGR	2	0.12273	3
A0A1S4ALM3	27	K	ubiquitin-40S ribosomal protein S27a-like	1	LOC107799069	1	1.82322e-09	127.2	TITLEVESSDTIDNVK(1)AK	2	0.22736	3
A0A1S3WZX1	174	K	elongation factor 1-beta-like	1	LOC107759618								1	0.000624062	69.255	SVQQEGLTWGASK(1)LVPVGYGIK	3	-0.57069	1
A0A1S3ZAP6	462	K	uncharacterized protein LOC107784855	1	LOC107784855	1	0.0123736	53.033	SQFVLNHEGLQQISK(1)VDQR	3	-1.3734	1
A0A1S4CES9	401	K	ferric reduction oxidase 2-like isoform X2	3	LOC107818189	1	0.0061707	113.26	CEGSWTK(1)K	2	0.7744	2	1	0.0123799	99.442	CEGSWTK(1)K	2	-0.17258	1	1	0.0164321	117.89	CEGSWTK(1)K	2	-0.32941	2
A0A1S3Y5P6	188	K	serine/threonine-protein kinase CDL1-like	1	LOC107772240															1	0.00275781	80.387	GLEYLHDK(1)ASPPVIYR	3	0.13185	1
A0A0A7AF85	369	K	Carotenoid cleavage dioxygenase 1-1	2	CCD1-1	1	0.00047862	82.663	LQNPDLDAINGTEK(1)EQQR	3	0.12468	2								1	1.49549e-12	124.29	LQNPDLDAINGTEK(1)EQQR	3	-1.6356	2
A0A1S4B126	143	K	ras-related protein RABE1a	3	LOC107803437	1	1.60324e-06	116	AVPTSK(1)GQALADEYGIK	2	-0.33623	2	1	0.000168072	94.203	AVPTSK(1)GQALADEYGIK	2	-0.833	3	1	2.01797e-05	103.04	AVPTSK(1)GQALADEYGIK	2	-0.82439	3
A0A1S4BYQ0	271	K	Glyceraldehyde-3-phosphate dehydrogenase	1	LOC107813294								1	1.3635e-114	228.93	AAIKEESEGK(1)LK	3	-0.21117	5
A0A1S4ACA6	751	K	protein argonaute 4-like	3	LOC107796081	1	0.0281975	51.528	FLDEK(1)WSPK	3	-1.0052	1	1	0.0306108	49.418	FLDEK(1)WSPK	3	-1.4359	1	1	0.00885321	69.275	FLDEK(1)WSPK	3	-0.71354	2
A0A1S4BHW2	56	K	eukaryotic translation initiation factor 1A-like	3	LOC107808437	1	0.0114308	64.224	CEAMCIDGTK(1)R	3	-1.3497	1	1	0.0161191	63.864	CEAMCIDGTK(1)R	3	0.69799	1	1	0.0276208	59.198	CEAMCIDGTK(1)R	3	0.70035	1
A0A1S4CQ71	328	K	actin-like	1	LOC107821481								1	0.0158985	63.292	EITALAPSSMK(1)IK	3	0.0054099	2
A0A140G1R3	564	K	Photosystem I P700 chlorophyll a apoprotein A1	3	psaA	1	0.0261823	52.725	LIPDK(1)ANLGFR	3	0.34701	1	1	0.00282158	87.789	LIPDK(1)ANLGFR	3	0.30532	1	1	0.0025815	84.687	LIPDK(1)ANLGFR	3	0.34352	1
A0A1S4ADP2	359	K	UDP-glucose 6-dehydrogenase	3	LOC107796541	1	2.17082e-05	101.78	AK(1)LSIYDPQVNEDQIQR	3	0.77058	3	1	4.54757e-21	145.69	AK(1)LSIYDPQVNEDQIQR	3	0.21045	2	1	6.10811e-15	139.08	AK(1)LSIYDPQVNEDQIQR	3	-0.32296	1
Q08IJ1	15	K	ADP ribosylation factor	2	ARF	1	0.0232004	91.853	LFAK(1)K(1)EMR	2	0.45677	3								1	0.0131321	83.206	LFAK(1)K(1)EMR	3	-0.24096	1
A0A1S4DRL4	312	K	calcium-dependent protein kinase 5-like	1	LOC107832719	1	0.0308095	43.405	HFSAMNK(1)LK(1)K(1)MALR	3	-3.7873	1
A0A1S4DFC1	337	K	uncharacterized protein LOC107829109 isoform X2	1	LOC107829109								0.978588	0.0344606	55.851	EGK(0.999)TSTANK(0.022)NPANQK(0.979)EK	3	1.5113	1
A0A1S4D0S8	79	K	remorin-like	1	LOC107824746								0.777141	7.3623e-05	111.72	AAEPAEEK(0.777)K(0.223)EGSIDR	3	-0.086189	1
A0A1S4BHG0	144	K	uncharacterized protein LOC107808316	1	LOC107808316								0.996469	0.0328031	60.972	NQK(0.853)K(0.15)QNK(0.996)K	2	-0.97883	1
A0A1S4DCQ2	479	K	Transmembrane 9 superfamily member	3	LOC107828343	0.999821	0.00592332	94.023	KPAIEDPVK(1)TNK	3	0.14439	1	0.999994	0.00358708	94.781	KPAIEDPVK(1)TNK	3	0.5565	1	0.999999	0.00842607	89.44	KPAIEDPVK(1)TNK	3	0.17091	1
A0A1S3XCI3	389	K	ankyrin repeat-containing protein At3g12360-like	1	LOC107763657															1	0.0202158	62.799	DIHTQLEQTK(1)R	3	1.1886	1
A0A1S3Z6X4	28	K	ubiquitin receptor RAD23c-like	1	LOC107783652	1	3.75413e-07	86.959	K(1)NIETVQGSDVYPAGQQMLIHQGK	4	-0.49951	2
Q589Y1	63	K	Glycosyltransferase	1	NtGT5b	1	0.0170152	58.04	GPDSLK(1)GLSSFR	3	0.34298	1
A0A1S4BQD1	118	K	uncharacterized protein C167.05-like	1	LOC107810745								1	0.0130726	51.495	LCEAIDK(1)TPLSCLVIGNR	3	0.38332	2
A0A075F2H4	12	K	Ubiquitin-conjugating enzyme E2 36-like protein	1	Ubc13-2								1	0.0290405	91.906	IIK(1)ETQR	2	-0.25722	1
A0A140G1S3	177	K	Ribulose bisphosphate carboxylase large chain	3	rbcL	0.999088	4.68216e-07	115.68	YGRPLLGCTIK(0.001)PK(0.999)LGLSAK	4	0.29661	7	0.999941	1.90351e-25	149.19	YGRPLLGCTIKPK(1)LGLSAK	4	-0.93576	7	0.995435	7.04864e-08	121.18	PLLGCTIK(0.005)PK(0.995)LGLSAK	3	0.48161	6
A0A1S3ZDW5	176	K	60S ribosomal protein L11-1-like	1	LOC107785771								1	0.035274	66.004	YEGVILNK(1)SSNLQ	2	-1.4749	1
A0A1S3XY94	126	K	IRK-interacting protein-like	2	LOC107770141								1	2.35483e-05	116.52	K(1)FQSEIQNK	2	2.0142	1	1	0.000537838	132.88	K(1)FQSEIQNK	2	1.1662	1
A0A1S4CIQ6	59	K	Peptidylprolyl isomerase	1	LOC107819491															1	0.0287699	54.023	VNILHYEDNMK(1)R	2	3.1963	1
A0A1S4AXD3	108	K	Histone H2B	1	LOC107802329															1	0.0193174	91.626	K(1)PTITSR	2	-1.3117	1
A0A1S3XHA1	782	K	leucine-rich repeat receptor-like serine/threonine-protein kinase BAM1	1	LOC107765200								1	0.0285535	47.971	K(1)GGHLHWNTR	3	0.74823	1
Q76CU2	482	K	Pleiotropic drug resistance protein 1	3	PDR1	1	0.00980104	73.219	K(1)LGDELATPFDK	3	-0.7453	2	1	0.0248636	55.196	K(1)LGDELATPFDK	3	0.6206	1	1	0.0183413	89.231	K(1)LGDELATPFDK	2	-0.34168	2
A0A1S4C3L6	387	K	synaptotagmin-3-like isoform X2	3	LOC107814771	1	0.0167978	60.08	INEK(1)YHLIDSK	3	0.79286	2	1	0.0221814	57.567	INEK(1)YHLIDSK	3	0.51229	1	1	0.0034187	79.23	INEK(1)YHLIDSK	3	-0.21205	1
A0A1S4CPL5	87	K	Profilin	2	LOC107821114	1	0.0295542	53.597	K(1)GPGGITVK	2	0.26955	1	1	0.0316108	73.887	K(1)GPGGITVK	2	-0.61405	1
A0A1S3XRB1	160	K	ubiquitin thioesterase OTU1-like	3	LOC107767833	1	0.00162369	147.62	LALNLVK(1)EQQR	2	0.71435	1	1	8.70027e-13	145.28	LALNLVK(1)EQQR	2	0.10046	1	1	0.00153874	125.23	LALNLVK(1)EQQR	2	-0.54909	1
A0A1S3ZYM9	617	K	5-methyltetrahydropteroyltriglutamate-- homocysteine methyltransferase-like	2	LOC107791827	1	0.0250492	45.876	K(1)SEHAFYLNWAVHSFR	4	-1.3305	1								1	1.01135e-11	132.14	K(1)SEHAFYLNWAVHSFR	3	0.26163	3
P93769	243	K	Elongation factor 1-alpha	2	tel1	1	2.29567e-05	97.621	LPLQDVYK(1)IGGIGTVPVGR	3	0.73352	2								1	9.68667e-05	82.609	LPLQDVYK(1)IGGIGTVPVGR	3	0.76562	2
A0A1S4D093	157	K	oleosin 1-like	1	LOC107824536								1	0.0121677	66.663	EYGGYLHSK(1)VK	3	0.80247	2
A0A1S3ZFA9	630	K	dynamin-like protein ARC5 isoform X1	3	LOC107786051	1	6.43692e-06	80.477	TDVK(1)LSHLASGNDSNTSTQTTETR	3	-0.12126	2	1	3.89061e-18	110.06	TDVK(1)LSHLASGNDSNTSTQTTETR	4	-0.76022	3	1	3.7192e-10	97.049	TDVK(1)LSHLASGNDSNTSTQTTETR	4	-1.4111	3
A0A1S3YL98	199	K	glutathione S-transferase DHAR2-like	1	LOC107777254								1	0.0308501	46.88	AAK(1)EYIIAGWAPK	3	-0.70998	1
A0A1S4CIH1	163	K	26S proteasome non-ATPase regulatory subunit 6 homolog	1	LOC107819413	1	0.0322054	54.023	K(1)LFEEGGDWER	2	-2.4335	1
A0A1S3ZZ60	80	K	60S ribosomal protein L28-1-like	2	LOC107792010								0.692468	0.0098626	87.713	K(0.308)QNK(0.692)PSSLLNK	3	0.62663	1	0.733154	0.010071	86.014	K(0.267)QNK(0.733)PSSLLNK	3	0.73802	1
A0A1S3X1P6	71	K	abscisic acid receptor PYL9-like	2	LOC107760324	1	0.0202612	51.798	EVNVK(1)SGLPATTSTER	3	0.22282	1								1	0.00320502	64.588	EVNVK(1)SGLPATTSTER	3	0.58771	1
A0A1S4CQ40	317	K	Fructose-bisphosphate aldolase	3	LOC107821177	1	0.0163578	55.66	EENVQK(1)AQAAFLTR	3	0.44581	1	1	0.000179393	104.55	EENVQK(1)AQAAFLTR	2	4.3662	2	1	0.0291956	48.351	EENVQK(1)AQAAFLTR	3	1.4299	1
A0A1S4CKG9	201	K	syntaxin-51-like isoform X2	1	LOC107819861								1	0.0148465	103.28	LAILNK(1)R	2	-0.020353	1
A0A140G1S3	252	K	Ribulose bisphosphate carboxylase large chain	3	rbcL	1	6.62581e-69	238.83	GHYLNATAGTCEEMIK(1)R	3	-0.12076	6	1	8.7465e-114	218.34	GHYLNATAGTCEEMIK(1)R	2	0.84988	10	1	5.57627e-14	138.98	GHYLNATAGTCEEMIK(1)R	2	-1.6264	6
A0A1S3ZAN8	158	K	Werner Syndrome-like exonuclease	1	LOC107784650	1	0.018057	50.108	RMAK(1)AVVGK(1)VMEK(1)PK	4	-1.878	1
A0A1S3XL61	187	K	uncharacterized protein LOC107766394	1	LOC107766394															0.997098	0.0353038	51.03	TLADLLK(0.038)K(0.965)VGASYDPK(0.997)K	4	-0.41609	1
A0A1S4CHY2	536	K	bromodomain-containing protein DDB_G0270170-like	1	LOC107819199								0.745633	0.0284105	53.597	MEK(0.746)K(0.128)K(0.128)EEAK(0.999)K	3	-1.9506	1
A0A1S4ARV7	53	K	26S protease regulatory subunit 6A homolog	3	LOC107800555	1	0.0110155	84.169	TNLELDSFK(1)EK	2	1.0797	3	1	0.0142497	87.719	TNLELDSFK(1)EK	2	-0.11396	2	1	0.00467861	109.39	TNLELDSFK(1)EK	2	0.059626	2
A0A1S4ACF1	152	K	1-aminocyclopropane-1-carboxylate oxidase-like	1	LOC107796076															1	0.00846045	97.463	AFYGSK(1)GPTFGTK	2	-0.076532	1
A0A1S4D8Y5	53	K	uncharacterized protein LOC107827263	1	LOC107827263								1	0.0174439	86.189	NK(1)ETGFVWLK	2	1.269	1
A0A1S3XWG5	2	K	Glycosyltransferases	1	LOC107769571								1	0.028526	46.352	MK(1)QLAALQQGR	2	-0.83725	1
A0A1S4B126	194	K	ras-related protein RABE1a	3	LOC107803437	1	0.00527138	51.568	AEPSTLK(1)INQPDAGAGGSQAAQK	3	0.7488	1	1	0.00233353	56.131	AEPSTLK(1)INQPDAGAGGSQAAQK	3	1.0014	1	1	0.000809876	64.318	AEPSTLK(1)INQPDAGAGGSQAAQK	3	0.29304	1
A0A1S4A2U1	137	K	Histone H2A	1	LOC107793131															1	0.0335929	59.931	SLINK(1)TTK(1)E	3	0.22082	1
A0A1S4CHD1	195	K	40S ribosomal protein S3-1-like	3	LOC107819043	1	0.00168225	140.16	IMLDWDPK(1)GK	2	0.68774	3	1	3.48688e-11	142.98	IMLDWDPK(1)GK	2	0.14887	3	1	0.00728396	97.597	IMLDWDPK(1)GK	3	-0.10234	4
A0A1S4ANB9	297	K	peroxisomal (S)-2-hydroxy-acid oxidase-like	1	LOC107799508															1	0.00107647	73.984	GTDVFK(1)ALALGASGIFIGR	3	-0.53449	1
A0A1S4C0R9	92	K	probable inactive receptor kinase RLK902	3	LOC107813940	1	0.00610583	106.88	AYYYSK(1)DEK	3	-0.14794	2	1	0.00879359	111.46	AYYYSK(1)DEK	2	-0.74423	1	1	0.0260116	52.49	AYYYSK(1)DEK	3	0.15253	1
A0A1S4CHK0	56	K	ADP-ribosylation factor 2-like isoform X2	1	LOC107819113								1	1.28252e-19	138.01	NISFTVWDVGGQDK(1)IRPLWR	3	-0.30948	7
A0A1S3ZVF1	167	K	sulfoquinovosyl transferase SQD2-like	3	LOC107790882	1	0.000348072	145.23	K(1)VPLSLALSPR	2	-0.070318	5	1	1.1073e-18	155.99	K(1)VPLSLALSPR	2	-0.6617	5	1	0.0021443	179.94	K(1)VPLSLALSPR	2	-0.52676	5
A0A1S3Z3P5	26	K	V-type proton ATPase catalytic subunit A-like	2	LOC107782425								1	2.49915e-09	98.957	K(1)VSGPVVVADGMAGAAMYELVR	3	-0.25813	2	1	0.00138732	63.376	K(1)VSGPVVVADGMAGAAMYELVR	3	-0.15705	3
A0A1S3ZQA3	654	K	replication factor C subunit 3-like	1	LOC107789168								1	0.0201353	71.806	VEEFIAK(1)FMSWYK	2	0.009319	1
A0A1S3X1W2	19	K	FKBP12-interacting protein of 37 kDa-like	1	LOC107760369	1	0.00114434	79.337	K(1)LLLDPAIHEEFTR	3	1.5026	2
A0A1S3XHF5	335	K	S-adenosylmethionine synthase	1	LOC107765217	0.999975	0.00216299	105.2	IPDKEILK(1)IVK	3	0.71154	1
A0A1S3ZMV2	12	K	probable receptor-like protein kinase At5g15080	1	LOC107788422															1	0.0325162	54.65	MGLLASEDINLK(1)K	3	0.79299	1
A0A075F2H4	76	K	Ubiquitin-conjugating enzyme E2 36-like protein	3	Ubc13-2	1	5.6449e-07	177.83	FLTK(1)IYHPNIDK	3	0.32931	6	1	3.13633e-40	176.99	FLTK(1)IYHPNIDK	3	0.008786	7	1	1.15262e-06	191.48	FLTK(1)IYHPNIDK	3	-0.12053	4
A0A1S4B081	300	K	uncharacterized protein LOC107803091 isoform X3	1	LOC107803091	1	0.00649322	89.266	CGK(1)WSADEDKR	2	-3.164	1
A0A1S4DA62	72	K	40S ribosomal protein SA	3	LOC107827661	1	3.88222e-13	170.42	VIVAIENPK(1)DIIVQSAR	2	0.58817	6	1	1.10107e-20	147.7	VIVAIENPK(1)DIIVQSARPYGQR	4	0.12645	7	1	3.48764e-10	184.99	VIVAIENPK(1)DIIVQSARPYGQR	3	1.1142	9
A0A1S4BUT8	23	K	FRIGIDA-like protein	1	LOC107812119								1	0.0153804	53.491	IQQLQK(1)AFAELESHR	3	1.5724	1
A0A1S4B7K3	18	K	ubiquitin receptor RAD23c-like isoform X2	2	LOC107805338	1	0.00691564	56.799	GTHFEIEVK(1)PEDTVADVK	4	0.74791	1	1	0.0219924	46.121	GTHFEIEVK(1)PEDTVADVK	3	-0.48799	1
A0A1S4BCW0	128	K	plant UBX domain-containing protein 8-like isoform X2	2	LOC107806966	1	0.0218953	62.94	EIPIEVK(1)DGDGQSGHSR	3	-2.8968	1	1	0.000143889	96.435	EIPIEVK(1)DGDGQSGHSR	3	-0.68058	1
A0A1S4C337	31	K	uncharacterized protein LOC107814648	1	LOC107814648								1	0.00600619	53.327	NNFLLFDPAK(1)TSFLTSNPGIK	3	-2.0757	1
A0A1S4ADH7	52	K	uncharacterized protein LOC107796428	1	LOC107796428								1	0.0166087	63.29	DFSVEDYAK(1)DSVFK	3	0.57067	1
A0A1S3YYA3	51	K	ubiquitin receptor RAD23b-like isoform X3	3	LOC107780948	1	0.0111714	55.546	DNYPCGQQLLIHNGK(1)VLK	3	-1.0797	2	1	0.000508129	77.726	DNYPCGQQLLIHNGK(1)VLK	3	-2.2643	2	1	0.000569473	77.324	DNYPCGQQLLIHNGK(1)VLK	4	0.42709	2
A0A1S3ZD07	66	K	1-aminocyclopropane-1-carboxylate oxidase	1	LOC107785346	1	0.0266413	68.846	FK(1)EMVASK	2	-0.057102	1
A0A1S4AXS6	111	K	hypersensitive-induced response protein 1	2	LOC107802473	1	0.0341437	61.444	ASVPK(1)LNLDDVFEQK	3	1.9783	1	1	0.0111105	66.059	ASVPK(1)LNLDDVFEQK	3	-3.4764	1
A0A1S4D1U6	77	K	60S ribosomal protein L28-1-like	3	LOC107824985	0.997845	0.000667646	169.65	K(0.998)QNK(0.002)PSTLLNK	2	0.5316	1	0.999825	2.02419e-23	161.99	K(1)QNKPSTLLNK	2	0.14609	1	0.944063	0.0100703	89.561	K(0.944)QNK(0.056)PSTLLNK	2	1.1794	1
Q9LW96	452	K	Inositol-3-phosphate synthase	3		1	0.000219656	75.3	AEGEGK(1)FHSFHPVATILSYLTK	3	0.91199	4	1	9.65408e-05	76.693	AEGEGK(1)FHSFHPVATILSYLTK	3	0.03976	4	1	0.00771528	50.858	AEGEGK(1)FHSFHPVATILSYLTK	3	-0.13941	1
A0A1S3ZIW1	211	K	CSC1-like protein ERD4 isoform X2	2	LOC107787373	1	0.00460456	88.134	IYEELEGYK(1)K	2	0.60293	1	1	0.0189172	80.102	IYEELEGYK(1)K	2	-1.2565	1
A0A1S4BRD7	276	K	uncharacterized protein LOC107811098	3	LOC107811098	1	0.00118975	73.057	SGFSNK(1)MDGISVQPTSWR	3	-0.16576	1	1	0.000530362	75.682	SGFSNK(1)MDGISVQPTSWR	3	0.64181	1	1	0.00300719	62.658	SGFSNK(1)MDGISVQPTSWR	3	0.75234	1
A0A1S3YZR9	99	K	HMG1/2-like protein	2	LOC107781188	0.986605	0.0152723	80.96	K(0.013)AEYEK(0.987)NMDAYNR	3	-0.14321	1	0.999998	0.00418484	96.371	KAEYEK(1)NMDAYNR	2	2.1187	3
A0A1S4DRK4	11	K	40S ribosomal protein S20-2-like	3	LOC107832707	1	2.68781e-18	139.81	AAYAAMK(1)PTK(1)PGLEEPQEQIHK	3	-0.34218	21	1	5.83131e-37	153.25	AAYAAMK(1)PTK(1)PGLEEPQEQIHK	3	-0.70772	19	1	1.16008e-21	134.04	AAYAAMK(1)PTK(1)PGLEEPQEQIHK	4	0.23327	17
A0A1S4A709	489	K	protein ECERIFERUM 3-like	1	LOC107794456								1	0.0186133	60.255	IQK(1)EAPAEYQK	3	1.0504	1
A0A1S4ASS6	391	K	uncharacterized protein LOC107800987	3	LOC107800987	1	0.000930156	121.61	K(1)IEEAMSMK(1)K	2	2.2533	1	1	0.017433	74.841	K(1)IEEAMSMK(1)K	2	2.0792	1	1	0.000896496	120.45	K(1)IEEAMSMK(1)K	2	1.8834	1
A0A1S3XAD4	50	K	uncharacterized protein LOC107762984	1	LOC107762984															1	0.017825	57.885	HNSFQK(1)TNSLK	3	0.034591	1
A0A1S4B410	381	K	T-complex protein 1 subunit gamma	1	LOC107804248								1	0.00371823	84.365	GASK(1)DLLNEVER	2	-1.1826	2
A0A1S4B5W8	328	K	actin-97-like	1	LOC107804820															1	0.0280061	67.234	EITALAPSSMK(1)IK	2	0.36515	1
A0A1S4DKK3	87	K	transcription factor IIIB 90 kDa subunit-like isoform X3	1	LOC107830788	1	0.0316313	42.797	K(1)ILWEK(1)MNK(1)EFAK	2	2.8855	1
A0A1S4AVF7	197	K	"putative quinone-oxidoreductase homolog, chloroplastic"	3	LOC107801723	1	0.0242187	47.082	SLGADEVLDYK(1)TPEGAALK	3	2.1736	1	1	0.00741385	54.103	SLGADEVLDYK(1)TPEGAALK	3	1.8776	1	1	0.0223143	46.133	SLGADEVLDYK(1)TPEGAALK	3	-0.4393	1
A0A1S4AQ81	69	K	remorin-like	3	LOC107800107	1	2.18391e-21	192.32	ALVVVEDK(1)AAEPAEEKK	4	0.12076	8	1	1.25798e-30	160.03	ALVVVEDK(1)AAEPAEEKK	4	0.67629	8	1	3.51778e-11	179.55	ALVVVEDK(1)AAEPAEEKK	4	0.5901	10
A0A1S4A0H2	25	K	Protein yippee-like	1	LOC107792365															1	0.0197213	63.546	AYLFSK(1)VVNVTSGEIENR	3	-0.23879	1
A0A1S3ZMF5	225	K	"fructose-1,6-bisphosphatase, cytosolic-like"	1	LOC107788283	1	0.00031877	88.561	TLLYGGIFLYPADK(1)K	2	-3.3801	1
A0A1S4DIX3	305	K	neurofilament heavy polypeptide-like	1	LOC107830301								0.999944	0.0260701	57.106	LIHKEASLEALK(1)K(1)R	3	-0.12331	1
A0A1S3ZUI8	605	K	heat shock cognate protein 80-like	1	LOC107790625								1	0.00159208	91.961	DSSMAGYMSSK(1)K	2	0.32597	2
A0A1S4BUW0	122	K	probable protein phosphatase 2C 60	3	LOC107812141	1	0.0001323	94.007	K(1)AFQATEDGFLSVVTR	3	0.97135	1	1	3.70856e-05	99.813	K(1)AFQATEDGFLSVVTR	3	0.075224	1	1	3.99857e-08	119.04	K(1)AFQATEDGFLSVVTR	3	-0.3191	1
A0A1S4BGN4	57	K	26S proteasome non-ATPase regulatory subunit 4 homolog	3	LOC107808066	1	0.000244737	80.382	TQSNPENTVGILTMAGK(1)GVR	3	0.044223	3	1	7.02143e-10	109.5	TQSNPENTVGILTMAGK(1)GVR	2	0.46272	3	1	0.0133982	49.326	TQSNPENTVGILTMAGK(1)GVR	3	0.59385	2
Q84QE5	148	K	Ribulose bisphosphate carboxylase small chain	3	LOC107771723	1	0.000127193	80.541	LPMFGCTDATQVLAEVGEAK(1)K	3	-0.27702	3	1	8.11984e-09	96.379	LPMFGCTDATQVLAEVGEAK(1)K	3	-0.045125	2	1	4.86577e-05	81.807	LPMFGCTDATQVLAEVGEAK(1)K	3	0.2126	1
A0A1S3ZGD3	48	K	SKP1-like protein 1A	2	LOC107786549								1	4.85698e-21	120.32	HMIEDDCADTSIPLPNVTSK(1)ILAK	3	0.24539	5	1	5.83361e-13	94.564	HMIEDDCADTSIPLPNVTSK(1)ILAK	3	0.69118	5
A0A1S3ZAU1	58	K	glycine-rich RNA-binding protein-like	3	LOC107784861	1	0.0272727	49.149	GFGFVTFGDEK(1)SMR	3	-0.18957	1	1	0.0104008	60.196	GFGFVTFGDEK(1)SMR	3	0.26778	1	1	0.0157017	55.176	GFGFVTFGDEK(1)SMR	3	0.96209	1
A0A1S4DID0	159	K	DNA ligase 1-like isoform X2	1	LOC107830190	0.9934	0.0264584	53.395	NEK(0.993)GRISK(0.982)NAK(0.025)SNGDSTR	2	2.8912	1
O22402	330	K	Guanosine nucleotide diphosphate dissociation inhibitor	1	GDI	1	0.0231898	47.222	K(1)SDMYLFCCSYTHNVAPK	3	0.54806	1
A0A1S3XU57	256	K	Carbonic anhydrase	3	LOC107768773	1	8.78962e-05	91.926	VQGEHVDK(1)CFADQCTACEK	4	0.16463	4	1	6.23078e-10	110.56	VQGEHVDK(1)CFADQCTACEK	3	-0.46413	3	1	3.28464e-05	87.228	VQGEHVDK(1)CFADQCTACEK	3	-0.58215	4
A0A1S3XPI1	87	K	ubiquitin-NEDD8-like protein RUB2	1	LOC107767149	1	0.000441723	77.899	TLTGK(1)EIEIDIEPTDTIDR	3	-0.15698	1
A0A1S3ZGD3	128	K	SKP1-like protein 1A	1	LOC107786549															1	2.90687e-10	112.12	K(1)TFNIK(1)NDFTPEEEEEVRR	4	0.61159	1
A0A1S4BBI5	3	K	Carbonic anhydrase	2	LOC107806576								1	0.0292546	62.546	AK(1)GSYEK	2	-0.69804	1	1	0.00669438	98.997	AK(1)GSYEK	2	0.16478	1
A0A1S4B7X7	51	K	glutamine-dependent NAD(+) synthetase-like	3	LOC107805443	1	0.00172409	99.973	YFFK(1)YYSINR	2	0.47905	3	1	0.00174665	98.044	YFFK(1)YYSINR	3	0.33092	2	1	0.0106794	63.426	YFFK(1)YYSINR	3	0.30067	1
A0A0A8WK73	4	K	Aquaporin PIP1 4	3	LOC107817177	1	0.0088388	147.2	MENK(1)EEDVR	2	-0.83228	3	1	3.92933e-11	148.52	MENK(1)EEDVR	2	0.46422	2	1	6.14906e-05	134.25	MENK(1)EEDVR	2	0.28302	3
A0A1S4BRR9	31	K	PTI1-like tyrosine-protein kinase At3g15890	2	LOC107811212	1	0.0175951	49.924	VFSLK(1)ELHSATNNFNYDNK	3	2.6514	1								1	2.17843e-08	100.69	VFSLK(1)ELHSATNNFNYDNK	3	2.0227	1
A0A1S4DPN8	333	K	trans-resveratrol di-O-methyltransferase-like	1	LOC107832093															0.999365	0.027719	57.788	SEK(0.999)GWAK(0.001)LFSDAGFSDYK	3	4.4842	1
A0A1S3Y9P7	275	K	Cytosine-specific methyltransferase	3	LOC107774010	1	0.0050685	66.059	LK(1)IVPVPSNATLQFK	3	0.55309	1	1	0.000799826	88.706	LK(1)IVPVPSNATLQFK	3	0.95761	1	1	0.00229	70.272	LK(1)IVPVPSNATLQFK	3	0.57785	1
A0A1S4BXI5	256	K	cinnamoyl-CoA reductase 2-like	1	LOC107812936								0.979801	0.0294825	40.493	HICMAHK(0.02)AK(0.98)SQDLVDMLK	3	1.1169	1
A0A1S3Y8B9	40	K	"Chlorophyll a-b binding protein, chloroplastic"	2	LOC107773466	0.927216	0.001356	87.352	TVTK(0.927)AK(0.073)PVSSGSPWYGPDR	3	-0.40601	1	0.999913	9.84888e-15	126.8	TVTK(1)AKPVSSGSPWYGPDR	3	0.5088	1
A0A1S4CAZ2	315	K	"GDP-mannose 3,5-epimerase 1-like"	2	LOC107817046	1	0.0081777	72.096	EK(1)LGWAPTMR	3	-0.28454	1								1	0.0239852	53.237	EK(1)LGWAPTMR	3	0.1097	1
A0A1S4BYQ0	196	K	Glyceraldehyde-3-phosphate dehydrogenase	3	LOC107813294	1	0.000675469	121.68	TVDGPSAK(1)DWR	3	-0.054055	3	1	0.000971612	112.94	TVDGPSAK(1)DWR	3	1.1054	4	1	1.2116e-07	147.91	TVDGPSAK(1)DWR	2	-0.12414	3
A0A1S3YEW7	186	K	UDP-D-apiose/UDP-D-xylose synthase 2-like	1	LOC107775473								1	0.0179294	58.781	WSYACAK(1)QLIER	3	0.78579	1
A0A1S4AJ87	475	K	RBR-type E3 ubiquitin transferase	2	LOC107798305	1	0.00291074	64.26	LHQCAEK(1)ELQTYLNATGPSK	4	-0.1418	2								1	0.0140165	48.896	LHQCAEK(1)ELQTYLNATGPSK	4	1.3465	2
A0A1S4C6E1	527	K	protein QUIRKY-like	2	LOC107815700	1	0.00336665	84.507	VGPGK(1)DEVIGR	3	0.85791	1								1	0.00644202	74.962	VGPGK(1)DEVIGR	3	1.4851	1
A0A1S3YPC7	609	K	protein SIEVE ELEMENT OCCLUSION B-like isoform X2	1	LOC107778376	1	0.0317549	53.013	GK(1)GDLMVQVMR	3	0.039932	1
A0A1S3XR20	25	K	26S protease regulatory subunit S10B homolog B-like	3	LOC107767815	1	0.00857161	87.713	LLQHK(1)ELESR	2	0.825	2	1	0.0195086	76.326	LLQHK(1)ELESR	3	0.5548	2	1	0.0317151	70.728	LLQHK(1)ELESR	2	0.5856	1
A0A1S4AB94	295	K	altered inheritance of mitochondria protein 32-like	3	LOC107795657	1	0.00798275	67.252	GQMGQYEK(1)VTEK	3	-0.87848	1	1	0.00434512	76.073	GQMGQYEK(1)VTEK	2	-0.99481	2	1	0.00180494	91.62	GQMGQYEK(1)VTEK	2	-0.18223	2
A0A1S4CUZ8	225	K	transcription repressor OFP1-like	1	LOC107822769	0.999998	0.0150894	114.86	KRQEK(1)SEHK	2	1.707	1
A0A1S4DIH9	149	K	uncharacterized protein LOC107830122	1	LOC107830122															1	0.00374466	76.843	SSSPK(1)NYPIK(1)K	3	-1.9195	1
A0A1S3XSR1	213	K	"digalactosyldiacylglycerol synthase 1, chloroplastic-like"	1	LOC107768312								1	0.029741	46.68	VK(1)SSLK(1)SICK(1)EPEDTK	3	-3.0489	1
A0A1S3ZMR1	8	K	ABC transporter B family member 19	1	LOC107788417	1	0.00329733	75.764	AETTEGK(1)PMPEAEK	2	2.7686	1
A0A1S4C2S1	43	K	40S ribosomal protein S2-3-like	3	LOC107814537	1	0.00040866	143.76	ETEEEK(1)WVPVTK	3	-0.061938	4	1	2.60501e-72	203.88	ETEEEK(1)WVPVTK	2	0.89012	4	1	5.70722e-05	131.32	RETEEEK(1)WVPVTK	3	0.75756	5
A0A1S4DIH9	154	K	uncharacterized protein LOC107830122	1	LOC107830122															1	0.00374466	76.843	SSSPK(1)NYPIK(1)K	3	-1.9195	1
A0A1S4BAN5	810	K	Lipoxygenase	2	LOC107806327								0.999991	0.00581907	73.885	IIKMNNDK(1)K(1)LK	2	-1.5958	1	0.999999	0.000673456	100.88	IIK(0.001)MNNDK(0.999)K(1)LK	2	-2.3226	1
A0A1S4CYM9	39	K	Serine/threonine-protein phosphatase	2	LOC107824041	1	0.00589686	77.24	AK(1)EILMNESNVQPVK	2	0.20973	1	1	0.00539397	85.493	AK(1)EILMNESNVQPVK	3	0.35858	2
A0A140G1S3	429	K	Ribulose bisphosphate carboxylase large chain	3	rbcL	1	3.02871e-16	203.29	VALEACVK(1)AR	2	-1.4502	7	1	1.85989e-36	174.02	VALEACVK(1)AR	2	-0.13346	3	1	0.000242329	166.07	VALEACVK(1)AR	2	-0.2554	7
A0A1S3ZG84	88	K	uncharacterized protein LOC107786495	1	LOC107786495															0.999788	0.0147246	89.142	NFK(1)KIDK	2	0.71493	1
A0A1S3ZDW5	37	K	60S ribosomal protein L11-1-like	1	LOC107785771								1	0.0165931	59.792	AAK(1)VLEQLSGQSPVFSK(1)AR	3	-0.2799	1
W0TY26	7	K	Sucrose transporter	3	SUT1	1	0.0028496	80.411	K(1)LNNVSSLAVEQPLPK	2	-0.72833	2	1	1.05446e-05	105.63	K(1)LNNVSSLAVEQPLPK	2	-0.67981	4	1	0.0022435	74.141	K(1)LNNVSSLAVEQPLPK	2	0.24052	4
I7GVS5	252	K	Heat shock protein 70	2	NtHsp70	1	0.0153558	80.834	MVNHFVQEFK(1)R	2	-0.99666	3	1	0.0113578	68.536	MVNHFVQEFK(1)R	3	0.89436	2
A0A1S3X4K7	249	K	uncharacterized protein LOC107761150	2	LOC107761150								1	4.89904e-06	92.932	LQAALGEQAEITK(1)LSQQEYER	3	1.0955	1	1	1.90742e-06	88.945	LQAALGEQAEITK(1)LSQQEYER	3	0.474	2
A0A1S3ZMR1	1071	K	ABC transporter B family member 19	1	LOC107788417								1	0.0145844	65.157	VMIDGK(1)DIR	3	-2.3805	1
A0A1S4C3E2	92	K	heavy metal-associated isoprenylated plant protein 3-like	2	LOC107814707	1	0.00523917	113.18	GEK(1)ADPLK	2	0.19625	2	0.999561	0.0110215	79.23	VVVKGEK(1)ADPLK	3	-0.34589	1
A0A1S4AIH8	112	K	uncharacterized protein LOC107797822	1	LOC107797822	1	0.0209657	42.639	RMNTLAIPQQACWMVRK(1)VIEAK	4	-2.9552	1
A0A1S3YBQ1	235	K	zinc finger AN1 and C2H2 domain-containing stress-associated protein 16-like	1	LOC107774578								1	0.000464338	97.452	ALIDHVQK(1)IHEK	3	0.83909	1
A0A1S3Y8B9	125	K	"Chlorophyll a-b binding protein, chloroplastic"	1	LOC107773466								1	0.0219699	55.105	NGVK(1)FGEAVWFK	3	1.4495	1
A0A1S3ZC89	238	K	uncharacterized protein LOC107785140	1	LOC107785140	1	0.0355571	41.838	PIAGSQVPVCPLEK(1)K	3	0.52756	1
A0A1S4CJY5	20	K	pyridoxal 5'-phosphate synthase-like subunit PDX1.2	1	LOC107819695	1	0.00294782	93.195	K(1)NPFSIK	2	-1.0337	1
A0A1S3Z6X4	27	K	ubiquitin receptor RAD23c-like	3	LOC107783652	0.999998	4.11749e-05	99.392	GSHFEIEVKPEDTVADVK(1)K	4	0.23914	1	0.999979	0.0150534	58.693	GSHFEIEVKPEDTVADVK(1)K	3	-1.1667	2	1	1.1922e-13	149.24	GSHFEIEVKPEDTVADVK(1)K	3	0.11932	3
A0A1S3YRT4	154	K	Glycine cleavage system H protein	2	LOC107778948	1	0.00102103	97.734	EYTK(1)FCEEEDSH	3	-0.28911	3								1	0.00197655	89.9	EYTK(1)FCEEEDSH	3	0.090364	3
A0A1S4CB42	135	K	ubiquitin-conjugating enzyme E2 variant 1B-like isoform X2	1	LOC107817091								1	0.00168605	88.092	K(1)LSQPSDGNEEGR	3	0.040603	1
A0A1S4BXK5	454	K	Glycosyltransferase	1	LOC107812963															1	0.00543705	71.614	IEEMK(1)EK(1)SRR	2	-1.5381	1
A0A1S4D0S8	71	K	remorin-like	3	LOC107824746	1	2.18391e-21	192.32	ALVVVEDK(1)AAEPAEEKK	4	0.12076	8	1	1.25798e-30	160.03	ALVVVEDK(1)AAEPAEEKK	4	0.67629	8	1	3.51778e-11	179.55	ALVVVEDK(1)AAEPAEEKK	4	0.5901	10
Q76N23	57	K	Histone H3.3	3	H3	0.999999	0.00460919	129.34	KYQK(1)STELLIR	2	0.18219	3	1	0.00596985	112.13	YQK(1)STELLIR	2	-0.013643	4	1	0.0134069	83.226	YQK(1)STELLIR	3	-0.18138	3
Q08IJ1	142	K	ADP ribosylation factor	2	ARF	1	8.95006e-20	159.5	QDLPNAMNAAEITDK(1)LGLHSLR	4	0.93079	4								1	1.94616e-17	159.72	QDLPNAMNAAEITDK(1)LGLHSLR	4	0.2926	5
A0A1S4AVF7	186	K	"putative quinone-oxidoreductase homolog, chloroplastic"	3	LOC107801723	1	0.00581403	60.938	NFDFVK(1)SLGADEVLDYK	3	0.69272	1	1	0.000937452	74.618	NFDFVK(1)SLGADEVLDYK	3	0.70101	1	1	0.00585461	59.342	NFDFVK(1)SLGADEVLDYK	3	0.14269	1
A0A1S4AFY5	29	K	D-xylose-proton symporter-like 2	1	LOC107797191															1	0.0193488	51.727	EPLLK(1)GEHHPENYSIR	3	0.31798	1
A0A1S4D5M8	33	K	uncharacterized protein LOC107826205 isoform X2	1	LOC107826205								1	0.031656	65.278	LIVPTNK(1)SSR	3	2.0937	1
A0A1S4C130	3	K	aquaporin PIP2-2-like	2	LOC107813938								1	0.00331633	74.133	AK(1)NVGSEGSFTTK	2	0.14566	2	1	0.000522107	101.43	AK(1)NVGSEGSFTTK	2	0.13882	1
A0A1S4ACA6	578	K	protein argonaute 4-like	2	LOC107796081	1	0.00548697	60.09	K(1)NLAEFGIVTQCIAPTR	3	0.97105	1	1	0.0127757	53.453	K(1)NLAEFGIVTQCIAPTR	3	0.96326	1
A0A1S4DPE9	300	K	pto-interacting protein 1-like	2	LOC107832028								0.997456	0.000588404	112.84	LSEDK(0.003)VK(0.997)QCVDAR	3	-0.27922	2	0.998772	0.00713052	84.297	LSEDK(0.001)VK(0.999)QCVDAR	3	-0.27949	1
A0A1S4DG44	207	K	uncharacterized protein LOC107829270	1	LOC107829270								1	0.029551	45.908	PRK(1)GK(1)LCSK(1)TR	3	3.452	1
A0A1S4D0S8	110	K	remorin-like	2	LOC107824746	1	0.00259961	128.6	AWEESEK(1)SK	2	1.6791	1	1	0.00311335	121.73	AWEESEK(1)SK	2	0.81347	1
A0A1S4CL33	75	K	Ubiquitin-fold modifier 1	2	LOC107820232	1	5.73573e-10	69.095	VPPQTSAIITNDGVGINPQQSAGNVFLK(1)HGSELR	4	-0.589	1	1	1.18996e-13	86.81	VPPQTSAIITNDGVGINPQQSAGNVFLK(1)HGSELR	4	0.011634	1
A0A1S4DCX5	819	K	receptor protein kinase TMK1-like	3	LOC107828287	1	0.00234123	99.013	MHINK(1)ETFR	3	0.41144	2	1	0.0252159	85.67	MHINK(1)ETFR	3	0.01943	2	1	0.00747006	85.676	MHINK(1)ETFR	3	0.1635	2
A0A1S4D9A2	355	K	elongation factor 1-gamma 2-like isoform X1	1	LOC107827359															1	0.0282291	53.968	VK(1)GLWLFR	3	-1.022	1
A0A1S3ZN92	377	K	DNA damage-inducible protein 1	1	LOC107788650								1	0.011694	67.214	VAK(1)LVELGFGR	3	-0.30143	2
A0A1S4DPX6	14	K	60S ribosomal protein L24	3	LOC107832170	1	0.0207921	57.55	FSGGK(1)IYPGR	3	-0.45583	1	1	0.0262947	53.751	FSGGK(1)IYPGR	3	-1.0555	1	1	0.010937	96.143	FSGGK(1)IYPGR	2	0.46349	3
A0A1S4DEY9	273	K	uncharacterized protein LOC107829099	1	LOC107829099								0.99989	0.00813679	84.188	PKEK(1)TMEQNLK	2	-4.2613	1
A0A1S4B105	179	K	Proteasome subunit alpha type	2	LOC107803419								1	6.70377e-14	147.33	NYK(1)ETSGQETVK	3	-0.62297	2	1	7.82993e-07	136.53	NYK(1)ETSGQETVK	3	-1.1847	2
A0A1S3Y965	143	K	ATP-dependent DNA helicase	2	LOC107773715	1	0.0275593	47.574	K(1)NIHIMLLR	3	3.5758	1								1	0.0281757	47.574	K(1)NIHIMLLR	3	3.1742	1
A0A1S3WZX1	183	K	elongation factor 1-beta-like	1	LOC107759618	1	0.0316511	46.001	LVPVGYGIK(1)K	3	-0.23868	1
A0A1S4CPT1	320	K	probable inactive receptor kinase At2g26730	3	LOC107821089	1	2.0337e-24	117.23	TQK(1)PPTTTAAAFTGAGEAGTSSSK(1)DDLTAEGER	4	0.031939	1	1	2.64612e-23	107.95	TQK(1)PPTTTAAAFTGAGEAGTSSSK(1)DDLTAEGER	4	-0.34242	1	1	1.3063e-24	106.66	TQK(1)PPTTTAAAFTGAGEAGTSSSK(1)DDLTAEGER	4	-0.22431	1
A0A1S3Y7I8	303	K	Phosphoribulokinase	3	LOC107773234	1	0.00221928	89.266	K(1)LTCSYPGIK	2	-1.1214	3	1	8.65993e-08	136.49	K(1)LTCSYPGIK	2	-0.69246	3	1	0.00552612	82.494	K(1)LTCSYPGIK	3	-0.044455	2
A0A1S4B5W8	52	K	actin-97-like	1	LOC107804820															1	9.52454e-17	117.35	HTGVMVGMGQK(1)DAYVGDEAQSK(1)R	3	1.5258	6
A0A1S3YQS0	494	K	Kinesin-like protein	1	LOC107778555	1	0.0226754	54.276	TSLEEK(1)IIGLEK	3	-1.0458	1
A0A1S3XGK4	252	K	heat shock cognate protein 80-like	2	LOC107764955	1	0.000795849	109.95	IK(1)EVSNEWSLVNK	2	0.51322	5								1	0.000169611	107.35	IK(1)EVSNEWSLVNK	3	0.80019	2
A0A1S3X1X5	87	K	ubiquitin carboxyl-terminal hydrolase 12-like	1	LOC107760390	1	0.0234209	50.659	YHAEEHGLQDAK(1)K	3	-0.021506	1
I7GVS5	191	K	Heat shock protein 70	2	NtHsp70	1	2.58352e-06	104.16	IINEPTAAAIAYGLDK(1)K	2	-0.63294	3								1	2.06109e-07	110.34	IINEPTAAAIAYGLDK(1)K	2	3.2717	3
A0A1S3ZE21	300	K	bZIP transcription factor 17-like	1	LOC107785821								1	0.03272	48.284	HYVGELEDK(1)VR	3	-0.36732	1
A0A1S4C575	111	K	uncharacterized protein LOC107815271	1	LOC107815271								1	0.010936	59.68	PGK(1)GVTNTCEVCER	3	0.29583	1
A0A1S4B5W8	115	K	actin-97-like	1	LOC107804820															1	0.0282006	48.053	VAPEEHPVLLTEAPLNPK(1)ANR	3	-0.40587	1
A0A1S4BAT9	410	K	glutamate--glyoxylate aminotransferase 2	2	LOC107806358								1	0.0157048	70.438	LGK(1)VPDVFYCLR	3	-0.47695	2	1	0.00671782	68.676	LGK(1)VPDVFYCLR	3	-0.62283	1
A0A0A8WK76	3	K	Aquaporin PIP2 9b	3	LOC107763243	1	1.99184e-12	168.42	TK(1)EVEVATEQPTEFSAK	3	0.040872	6	1	3.4e-128	225.17	TK(1)EVEVATEQPTEFSAK	2	-0.38199	5	1	5.68764e-62	254.89	TK(1)EVEVATEQPTEFSAK	2	0.49649	4
A0A1S3XSE4	8	K	uncharacterized protein LOC107768209	1	LOC107768209															0.973587	0.0353873	72.321	MSDSYNPK(0.974)K(0.023)K(0.003)K	2	4.1822	1
A0A1S3ZIE1	128	K	"photosystem I reaction center subunit II, chloroplastic"	3	LOC107787208	1	0.000500063	123.67	K(1)EQCLALGTR	3	0.10132	3	1	5.62187e-06	130.56	K(1)EQCLALGTR	2	-0.811	2	1	6.84014e-05	132.56	K(1)EQCLALGTR	2	0.015275	2
A0A1S3WZX1	117	K	elongation factor 1-beta-like	1	LOC107759618															1	0.0181316	47.991	AADDDDDDDIDLFGEETEEEK(1)K	3	-0.013016	1
A0A1S4CTV2	489	K	(-)-germacrene D synthase-like	1	LOC107822502	1	0.0141226	56.551	K(1)ILESK(1)WK(1)DLNR	3	0.12477	2
A0A1S4CMX7	118	K	Methionine aminopeptidase 2	1	LOC107820602															1	0.0256919	52.167	LEK(1)PTYNSVR	3	-1.1561	1
A0A1S3ZFB9	623	K	uncharacterized protein LOC107786062	1	LOC107786062								0.892376	0.0272344	43.419	K(0.037)MTK(0.892)K(0.065)K(0.006)QSAK	3	-2.2001	1
A0A1S4CW01	327	K	Transmembrane 9 superfamily member	3	LOC107823096	1	0.00645261	72.568	YEELDK(1)EAQAQMNEELSGWK	3	-1.0567	1	1	0.0100403	51.524	YEELDK(1)EAQAQMNEELSGWK	3	-0.097486	1	1	2.43544e-07	94.45	YEELDK(1)EAQAQMNEELSGWK	3	-0.53298	1
A0A1S4CNA4	11	K	pathogenesis-related genes transcriptional activator PTI6-like	1	LOC107820911															0.82999	0.0297979	41.996	EGK(0.998)FSQSIK(0.172)K(0.83)CVVHR	3	2.5272	1
A0A1S3ZW61	35	K	NPL4-like protein	1	LOC107791083								1	0.0254624	87.754	ALK(1)DHFNR	2	-1.5205	1
A0A1S4BZP5	201	K	putative potassium transporter 12 isoform X4	2	LOC107813511								1	0.00441274	84.198	LK(1)LPTPELER	3	-0.91208	2	1	0.0325066	47.894	LK(1)LPTPELER	3	-0.38883	1
A0A1S4BJZ7	75	K	syntaxin-22-like	3	LOC107809174	1	0.00887619	81.185	VHIGQLVK(1)DTSAK	2	-0.13547	1	1	0.000392337	101.38	VHIGQLVK(1)DTSAK	2	-0.69173	1	1	0.00174331	79.283	VHIGQLVK(1)DTSAK	2	1.8823	2
A0A1S3ZW91	31	K	uncharacterized protein LOC107791111	1	LOC107791111															1	0.0238908	47.712	QK(1)LMLDIK(1)LMVK(1)R	3	4.3287	1
A0A1S4DM02	9	K	UDP-glucuronate 4-epimerase 6-like	1	LOC107831214															1	0.0349887	42.682	ASPPDTSK(1)TTK(1)LER	3	0.90329	1
A0A1S4C7N1	624	K	pyrophosphate-energized vacuolar membrane proton pump-like	2	LOC107815824	1	0.000440808	73.675	QFNTIPGLMEGTAK(1)PDYATCVK	3	-0.4376	3								1	9.32043e-08	91.964	QFNTIPGLMEGTAK(1)PDYATCVK	3	-0.43766	3
A0A1S4DJ63	627	K	phosphoenolpyruvate carboxylase-like	3	LOC107830408	1	0.000169968	155.97	EFGVK(1)LTMFHGR	2	4.0264	7	1	2.96278e-49	181.68	EFGVK(1)LTMFHGR	3	0.14727	10	1	8.88669e-07	177.57	EFGVK(1)LTMFHGR	2	-0.27046	12
A0A1S4B7E4	120	K	ethylene-responsive transcription factor 5-like	1	LOC107805279															0.999909	0.0208618	56.774	K(0.961)TEESK(0.039)TEEPK(1)TEESK	3	-0.33618	1
Q40589	147	K	Cytosolic ascorbate peroxidase	2	LOC107759703								0.999996	3.86954e-15	106.1	DVFVK(1)QMGLSDKDIVALSGGHTLGR	3	-0.48053	3	0.999994	2.2672e-23	141.45	DVFVK(1)QMGLSDKDIVALSGGHTLGR	4	0.030287	4
A0A1S4D1W7	78	K	altered inheritance of mitochondria protein 32-like	1	LOC107825067								1	0.010588	54.073	AEMYQSK(1)LAGTATSYDR	3	-2.1976	1
A0A1S4BWC7	41	K	26S protease regulatory subunit 7 homolog A isoform X1	3	LOC107812550	1	0.00292995	77.894	TYGLGPYSTSIK(1)K	2	0.93819	3	1	0.00113632	92.295	TYGLGPYSTSIK(1)K	3	-0.8728	3	1	0.00373521	78.401	TYGLGPYSTSIK(1)K	2	-0.58637	2
A0A1S4BUH9	89	K	protein DA1-related 1-like	1	LOC107812031															0.785559	0.0336891	40.676	AIALSLAEEDQK(0.786)GK(0.214)K	4	0.37136	1
A0A1S3Y3Y2	86	K	proteinase inhibitor I-B-like	2	LOC107771920								1	0.00598516	112.11	IIEK(1)ENPIAK	2	0.17633	2	1	0.00514743	108.47	IIEK(1)ENPIAK	2	0.21627	1
A0A1S4BBC6	142	K	ubiquitin-conjugating enzyme E2 28-like isoform X2	1	LOC107806522								1	0.00912996	80.165	SWTQK(1)YAMG	2	-0.82514	2
A0A1S4ATP7	642	K	cullin-1-like	1	LOC107801322	1	0.013487	66.738	TVSPTDHFEFNSK(1)FTDR	3	-2.327	1
A0A1S4ARC4	265	K	Serine hydroxymethyltransferase	3	LOC107800464	1	5.91999e-06	127.66	K(1)GQPEDAVYDFEDK	2	0.34421	2	1	0.000219285	112.17	K(1)GQPEDAVYDFEDK	2	-0.28093	4	1	0.0014536	90.853	K(1)GQPEDAVYDFEDK	3	0.63427	3
A0A1S3YYA3	9	K	ubiquitin receptor RAD23b-like isoform X3	1	LOC107780948	1	0.0221451	56.404	TLK(1)GSHFEIR	3	-0.25176	1
A0A1S3X993	170	K	small glutamine-rich tetratricopeptide repeat-containing protein alpha-like isoform X3	3	LOC107762617	1	0.00112453	85.287	STAINPNYSK(1)AYSR	2	1.1757	2	1	0.000428132	97.69	STAINPNYSK(1)AYSR	3	0.34932	4	1	8.7069e-08	132.31	STAINPNYSK(1)AYSR	3	0.25308	2
Q0PWS5	108	K	"Chlorophyll a-b binding protein, chloroplastic"	3	Lhcb5	0.727985	0.00120393	84.195	K(0.728)PEDFAK(0.272)YQAYELIHAR	4	-1.3875	1	0.713142	0.00617399	67.646	K(0.713)PEDFAK(0.287)YQAYELIHAR	4	-1.0575	1	0.688929	0.0119129	61.477	K(0.689)PEDFAK(0.311)YQAYELIHAR	4	-1.8687	1
A0A1S4D9L7	76	K	protein PEROXIN-4 isoform X2	3	LOC107827478	1	0.0304246	48.513	FLTK(1)IFHPNVHFK	3	0.62643	1	1	0.0060521	68.515	FLTK(1)IFHPNVHFK	3	0.80519	1	1	0.00467587	69.864	FLTK(1)IFHPNVHFK	3	0.85122	2
A0A1S4DK81	171	K	formate--tetrahydrofolate ligase-like isoform X1	1	LOC107830687	1	0.00011252	95.195	IFHESSQSDK(1)ALFNR	3	0.83449	2
P69249	149	K	"Ribulose bisphosphate carboxylase small chain, chloroplastic"	3	RBCS	1	0.00119984	112.41	K(1)AYPQAWIR	2	0.88416	2	1	0.00270394	97.431	K(1)AYPQAWIR	2	-0.62986	3	1	0.00479236	90.601	K(1)AYPQAWIR	3	0.16588	2
O49911	94	K	Plasma membrane polypeptide	2	LOC107764465	1	0.0282914	48.608	FLDELVK(1)IEFPGSK	3	0.52329	1								1	1.05811e-05	113.54	FLDELVK(1)IEFPGSK	3	0.76406	2
A0A1S3X4U8	405	K	Methylenetetrahydrofolate reductase	3	LOC107761305	1	0.019969	58.246	FMNYCLGK(1)LR	3	0.66203	1	1	0.0168036	61.161	FMNYCLGK(1)LR	3	-0.20278	1	1	0.0165334	80.755	FMNYCLGK(1)LR	3	0.54061	1
A0A1S4C0N4	28	K	Cyclin-dependent kinases regulatory subunit	3	LOC107813910	1	2.30679e-06	130.69	HVVLPPDVAK(1)LLPK	3	-0.34182	3	1	7.1721e-12	136.93	HVVLPPDVAK(1)LLPK	3	-0.67273	3	1	6.32392e-09	132.79	HVVLPPDVAK(1)LLPK	3	-0.51906	5
A0A1S4CKJ4	223	K	"L-ascorbate peroxidase 3, peroxisomal"	1	LOC107819788								1	0.0328066	42.947	QYVELYAK(1)DEDAFFR	3	-0.36613	1
A0A0A8WHB3	5	K	Aquaporin PIP1 2b	2	LOC107779998	1	1.30012e-06	138.02	AENK(1)EEDVK(1)LGANK	2	-1.0875	5								1	3.23394e-09	135.94	AENK(1)EEDVK(1)LGANK	2	-1.6388	3
A0A1S4DCM5	15	K	probable aquaporin PIP-type pTOM75	3	LOC107828413	0.99953	0.0176882	47.855	AENKEEDVNLGANK(1)YR	3	0.036681	1	0.999991	0.000618039	81.526	AENKEEDVNLGANK(1)YR	3	0.25891	2	0.995545	0.01739	52.569	AENK(0.004)EEDVNLGANK(0.996)YR	3	2.0156	1
A0A1S4BHH1	96	K	syntaxin-71-like	3	LOC107808330	1	0.000541698	99.732	VK(1)GLSGEELAAR	2	-0.075612	2	1	0.00124842	92.856	VK(1)GLSGEELAAR	3	-0.075351	2	1	4.60957e-05	132.06	VK(1)GLSGEELAAR	3	-0.64963	2
A0A1S4DCX7	595	K	LOW QUALITY PROTEIN: protein SUPPRESSOR OF MAX2 1-like	3	LOC107828496	1	0.0031778	80.245	FASALDADTFK(1)R	3	0.11259	1	1	0.000935452	99.5	FASALDADTFK(1)R	2	4.4929	3	1	0.000386669	108.9	FASALDADTFK(1)R	3	-0.24387	2
A0A1S3YE95	81	K	uncharacterized protein LOC107775314	1	LOC107775314															0.9999	0.0316525	40.941	EK(1)LMFDLQTEADKIK	4	1.5402	1
A0A1S3YAF7	33	K	uncharacterized protein LOC107774054	1	LOC107774054	1	0.0306793	76.1	SLEIAEPK(1)K	2	-0.013482	1
A0A1S4D1U6	55	K	60S ribosomal protein L28-1-like	3	LOC107824985	1	0.00879552	81.676	K(1)TVTIQAEGK	2	0.13898	2	1	0.0107363	68.786	K(1)TVTIQAEGK	3	-0.99383	1	1	0.00749857	99.539	K(1)TVTIQAEGK	2	0.77185	2
A0A1S3ZFA9	401	K	dynamin-like protein ARC5 isoform X1	3	LOC107786051	1	5.54799e-08	118.31	GTVIAPPDK(1)FGETLQDER	3	0.41716	2	1	1.05889e-12	128.59	GTVIAPPDK(1)FGETLQDER	3	0.21828	2	1	1.30441e-05	90.379	GTVIAPPDK(1)FGETLQDER	3	0.37717	2
A0A1S3Y8B9	42	K	"Chlorophyll a-b binding protein, chloroplastic"	2	LOC107773466	1	0.0200002	52.569	AK(1)PVSSGSPWYGPDR	3	0.74497	1	1	0.000131285	101.04	AK(1)PVSSGSPWYGPDR	3	0.4643	3
P41919	40	K	GTP-binding nuclear protein Ran-B1	3	RAN-B1	1	0.00624565	80.755	HLTGEFEK(1)K	3	0.76915	2	1	0.0119174	93.667	HLTGEFEK(1)K	2	0.28651	1	1	0.0214588	94.409	HLTGEFEK(1)K	2	0.67935	1
A0A0A8WJH9	278	K	Aquaporin PIP2 4b	1	LOC107824558								1	0.0172548	82.494	AGALK(1)ALGSFR	2	-0.060729	1
Q852P7	299	K	Nitrate transporter	3	NtNRT1.1-t	1	0.0121745	93.429	LPHSK(1)EFR	2	0.021201	2	1	0.0255057	95.741	LPHSK(1)EFR	2	0.044915	2	1	0.00446313	89.752	LPHSK(1)EFR	3	-0.073159	1
A0A1S4DBQ6	70	K	Glyceraldehyde-3-phosphate dehydrogenase	3	LOC107828122	0.529022	0.002557	100.73	VK(0.471)DEK(0.529)TLLFGEK	3	-0.058968	1	0.999921	0.00405122	106.58	VKDEK(1)TLLFGEK	2	-0.32856	2	0.999985	0.00239564	103.13	VKDEK(1)TLLFGEK	2	-0.073246	2
A0A1S3YZU3	179	K	Plasma membrane ATPase	3	LOC107781513	1	3.3071e-10	110.57	LLEGDPLK(1)IDQSALTGESLPVTK	3	0.083532	2	1	6.79875e-38	155.71	LLEGDPLK(1)IDQSALTGESLPVTK	3	0.078664	3	1	4.07034e-17	115.99	LLEGDPLK(1)IDQSALTGESLPVTK	3	-0.15154	1
A0A1S4D864	159	K	SNW/SKI-interacting protein-like	1	LOC107827086								0.99964	0.0324827	40.475	SK(0.011)VQK(0.99)EMIMK(1)EK	2	-0.51388	1
A0A1S4CVE4	276	K	uncharacterized protein LOC107823025	1	LOC107823025															1	0.00192236	87.824	ETLLSSEK(1)QFQTIER	3	-0.51534	1
A0A1S4B2J7	4	K	heat shock cognate 70 kDa protein 2	1	LOC107803885								1	2.79784e-06	69.726	AGK(1)GEGPAIGIDLGTTYSCVGVWQHDR	3	-0.93641	1
A0A1S3ZHQ7	205	K	Proteasome subunit alpha type	3	LOC107786909	1	7.46521e-07	176.32	IIYGVHDEAK(1)DK	2	0.22076	2	1	1.50767e-09	136.93	IIYGVHDEAK(1)DK	2	-0.54579	2	1	8.98453e-08	147.33	IIYGVHDEAK(1)DK	2	-0.09646	3
A0A1S4CME9	72	K	uncharacterized protein LOC107820357	3	LOC107820357	1	4.64739e-06	118.16	KTEEDHFLDAIK(1)AAAR	4	-0.89268	2	1	0.00521844	78.902	KTEEDHFLDAIK(1)AAAR	3	-1.5136	2	1	3.1723e-05	99.069	KTEEDHFLDAIK(1)AAAR	4	0.083599	2
A0A1S4DFB5	115	K	transmembrane protein 184C-like	1	LOC107829021	1	0.0189988	59.067	NIVPDEIK(1)GR	3	-0.22942	1
A0A1S4CEA3	212	K	"thylakoid lumenal 19 kDa protein, chloroplastic-like"	2	LOC107817913								1	0.0142052	52.862	NK(1)LYAHFVNAPAPEWK	3	-0.97238	1	1	0.00499768	61.962	NK(1)LYAHFVNAPAPEWK	3	0.18222	1
A0A1S4B268	4	K	RPM1-interacting protein 4-like	2	LOC107803671								1	0.00712854	74.165	SEK(1)GRPLPK	2	0.40542	1	1	0.00509035	76.17	SEK(1)GRPLPK	2	0.47813	2
A0A1S3XPI1	109	K	ubiquitin-NEDD8-like protein RUB2	1	LOC107767149	1	0.00659929	66.989	VEEK(1)EGIPPVQQR	3	0.13486	1
A0A1S4CNE1	544	K	phosphatidylinositol 4-kinase alpha 1	3	LOC107820741	1	0.000502359	76.118	LAAVGSAESK(1)TTAPEATTER	3	0.18176	2	1	5.87823e-05	83.423	LAAVGSAESK(1)TTAPEATTER	3	-0.40942	1	1	1.17019e-10	109.72	LAAVGSAESK(1)TTAPEATTER	3	0.53835	3
A0A1S4CB27	151	K	Coatomer subunit delta	1	LOC107817076															1	0.0290289	50.452	LVLQNK(1)INETK	3	-1.1393	1
A0A1S3Z9Y4	52	K	protein translation factor SUI1 homolog isoform X2	1	LOC107784410	1	0.0065917	80.229	K(1)EFSYNK	2	-0.44418	1
A0A1S4D9A2	245	K	elongation factor 1-gamma 2-like isoform X1	2	LOC107827359								0.91992	5.80511e-05	103.04	K(0.08)EEPK(0.92)FEEEEEAPKPK	4	0.47816	1	0.647174	0.000841463	88.108	K(0.353)EEPK(0.647)FEEEEEAPKPK	3	0.36862	1
A0A1S4C852	364	K	S-adenosylmethionine synthase	1	LOC107816144															1	0.00189231	84.687	YQK(1)TAAYGHFGR	4	0.54259	3
A0A1S3ZPC5	328	K	cytochrome P450 77A1-like	2	LOC107788916								1	0.00947814	79.148	LIENPSIQK(1)R	3	-0.11869	1	1	0.00557231	86.898	LIENPSIQK(1)R	3	0.47467	1
A0A1S3ZXV6	507	K	Phosphoinositide phospholipase C	3	LOC107791596	1	0.00124096	81.526	TK(1)TLEDNWIPTWDEK	3	-0.16739	2	1	0.000237168	107.82	TK(1)TLEDNWIPTWDEK	2	-0.33388	4	1	0.000159745	96.773	TK(1)TLEDNWIPTWDEK	2	-0.42676	3
A0A1S4CFW8	99	K	phosphoglycerate mutase-like protein 1 isoform X2	3	LOC107818500	1	0.0188587	81.525	ETK(1)EEVMAR	2	0.77408	2	1	0.0024448	97.431	ETK(1)EEVMAR	2	-0.13345	2	1	0.0319877	48.423	ETK(1)EEVMAR	3	0.098514	1
A0A1S4CYN9	297	K	"translocase of chloroplast 120, chloroplastic-like"	1	LOC107824053								1	0.00942113	63.462	LSK(1)DQRK(1)AYNDELEYREK	3	2.1872	1
A0A1S4BAT9	16	K	glutamate--glyoxylate aminotransferase 2	1	LOC107806358	0.995761	0.0180901	47.548	SSK(0.004)PLDYDNLNENVK(0.996)K	3	-0.39264	1
A0A1S3XGK4	471	K	heat shock cognate protein 80-like	2	LOC107764955	1	0.000387249	130.69	K(1)AVENSPFLEK	2	-0.060088	4								1	0.000109087	169.65	K(1)AVENSPFLEK	2	0.71379	4
A0A1S4DA65	109	K	ubiquitin-NEDD8-like protein RUB2	1	LOC107827608															1	0.00187546	80.318	VEEK(1)EGIPPVQQR	3	0.11487	2
A0A1S3YIZ0	709	K	Aconitate hydratase	2	LOC107776610								1	0.0100812	49.125	STYEAITK(1)GNNMWNQLSVPAAK	3	-0.56052	1	1	0.00894586	49.66	STYEAITK(1)GNNMWNQLSVPAAK	3	-0.62578	1
A0A1S4DBQ6	60	K	Glyceraldehyde-3-phosphate dehydrogenase	2	LOC107828122	1	0.0106554	59.294	YDSVHGQWK(1)HHELK	3	1.8306	1								1	0.00327585	69.352	YDSVHGQWK(1)HHELK	3	0.51606	1
A0A1S4C3G5	203	K	"2-Cys peroxiredoxin BAS1, chloroplastic-like"	2	LOC107814768	1	0.000178573	67.827	TLQALQYVQDNPDEVCPAGWK(1)PGEK	3	0.14329	1	1	1.34323e-12	100.92	TLQALQYVQDNPDEVCPAGWK(1)PGEK	3	-0.455	2
A0A1S4BFD9	97	K	Peptidyl-prolyl cis-trans isomerase	1	LOC107807631								1	0.000297253	126.24	FADENFVK(1)K	2	0.37812	1
A0A1S3XU57	84	K	Carbonic anhydrase	3	LOC107768773	1	2.03998e-06	125.97	LLSEK(1)GELGPIAAAR	2	-0.044182	3	1	1.56608e-08	126.09	LLSEK(1)GELGPIAAAR	2	-0.11308	5	1	1.15869e-05	111.66	LLSEK(1)GELGPIAAAR	2	-0.050762	5
A0A1S4CQ40	38	K	Fructose-bisphosphate aldolase	3	LOC107821177	1	6.47442e-07	155.14	GILAADESTGTIGK(1)R	2	0.41642	2	1	4.23807e-94	209.25	GILAADESTGTIGK(1)R	3	-0.3523	3	1	7.62741e-23	223.36	GILAADESTGTIGK(1)R	3	0.2404	3
A0A1S3XR94	109	K	jacalin-related lectin 3-like isoform X2	1	LOC107767817								1	0.00207888	104.2	SLTFQSNK(1)R	2	1.1736	1
A0A1S4AT67	199	K	RING-type E3 ubiquitin transferase	3	LOC107801161	1	0.00200817	89.301	TIVK(1)FLSHEQSK	2	-0.088445	3	1	0.00104244	113.95	TIVK(1)FLSHEQSK	3	-0.5806	3	1	0.000108232	117.95	TIVK(1)FLSHEQSK	4	-1.3515	4
A0A1S4D5R8	124	K	LOW QUALITY PROTEIN: selenium-binding protein 1-like	3	LOC107826302	1	0.0046366	77.744	IYAIDTQK(1)DPR	3	-0.79818	1	1	0.00532028	76.843	IYAIDTQK(1)DPR	3	-0.7233	2	1	0.000437442	105.17	IYAIDTQK(1)DPR	3	0.089765	1
A0A1S4DDW6	339	K	cytochrome P450 94A2-like	1	LOC107828765								1	0.0155211	65.809	K(1)IGEAYNFDELR	3	-2.9445	1
A0A1S4B2J7	523	K	heat shock cognate 70 kDa protein 2	1	LOC107803885								1	2.87223e-30	163.9	EEIEK(1)MVQEAEK	3	-0.11991	3
A0A1S4A9E2	62	K	probable copper-transporting ATPase HMA5	3	LOC107795189	1	0.00818928	56.819	LK(1)GIESATVSPLQGQAVVK	3	-0.25786	2	1	0.000194141	81.01	LK(1)GIESATVSPLQGQAVVK	3	-0.020787	3	1	8.49343e-08	97.713	LK(1)GIESATVSPLQGQAVVK	3	-0.21829	3
A0A1S3Y851	327	K	Transmembrane 9 superfamily member	3	LOC107773219	1	0.0280795	49.306	YDELDK(1)EAQAQMNEELSGWK	3	0.59266	2	1	0.0186756	46.099	YDELDK(1)EAQAQMNEELSGWK	3	-0.16255	2	1	3.11576e-05	85.737	YDELDK(1)EAQAQMNEELSGWK	3	0.56314	2
P93769	318	K	Elongation factor 1-alpha	2	tel1	1	0.000552575	103.14	GFVASNSK(1)DDPAK	2	0.62446	2								1	0.001673	88.101	GFVASNSK(1)DDPAK	3	0.26001	3
A0A1S4DFR5	52	K	dnaJ protein homolog isoform X2	2	LOC107829343	1	0.00278359	83.404	FK(1)ELAQAYEVLSDPEKR	3	0.49106	1	1	0.000218278	93.226	FK(1)ELAQAYEVLSDPEKR	3	0.55433	1
A0A1S3ZMB3	122	K	putative cyclin-A3-1	1	LOC107788519															1	0.0277229	48.602	K(1)MEIEEK(1)R	3	-1.6452	1
A0A1S4ABX7	185	K	guanine nucleotide-binding protein subunit beta-like protein	1	LOC107795918	1	0.0011362	107.79	IWNLTNCK(1)LR	3	0.39869	1
A0A1S4ALV4	95	K	Thioredoxin	2	LOC107799067								1	0.0127971	84.352	EGNIVDK(1)VVGAK	2	0.19749	1	1	0.0318895	66.326	EGNIVDK(1)VVGAK	2	1.5493	1
A0A1S3YBC0	140	K	COP9 signalosome complex subunit 5b-like	1	LOC107774324	1	0.018853	55.208	VNAQADAYEYMVEYSQTNK(1)QAGR	3	-0.65396	1
A0A1S4B9H4	153	K	Aminomethyltransferase	3	LOC107805971	1	0.00269826	85.672	DK(1)DLAHIEEHMK	3	0.19616	1	1	0.00274971	82.705	DK(1)DLAHIEEHMK	3	0.4718	2	1	0.0347398	60.161	DK(1)DLAHIEEHMK	3	0.92144	1
A0A1S4BAR2	333	K	"betaine aldehyde dehydrogenase, chloroplastic-like"	2	LOC107806351	1	0.00339171	66.068	ISDPLEEDCK(1)LGPVISR	3	-1.1836	1	1	0.000238694	88.427	ISDPLEEDCK(1)LGPVISR	3	-0.011683	1
A0A1S4AQ81	78	K	remorin-like	1	LOC107800107															1	1.3497e-05	124.47	K(1)EGSIDRDAVLAR	2	1.0585	7
A0A077DCK9	38	K	Carbonic anhydrase	1	LOC107821152															1	1.34218e-56	252.79	K(1)LLSEK(1)NELEDAAVAK	3	-0.59877	9
A0A1S3YAF1	124	K	E3 ubiquitin protein ligase RIE1-like	2	LOC107774254								0.994494	0.00132543	89.136	FHICK(0.994)DEEK(0.006)PSVGAGK	3	0.49501	1	0.582871	3.81514e-05	98.676	FHICK(0.583)DEEK(0.417)PSVGAGK	3	0.035505	1
A0A1S4DH21	149	K	uncharacterized protein LOC107829622	1	LOC107829622	1	0.0289636	59.294	SIIATTTVQK(1)K(1)EDPR	2	-2.3562	1
A0A1S4DB12	348	K	alcohol dehydrogenase-like 4	1	LOC107827847								1	0.00503062	75.764	SQLPLFAK(1)QCMAGVVK	3	0.99056	1
A0A1S3ZX98	151	K	THO complex subunit 4A-like	1	LOC107791454								1	0.0309044	69.721	RQDALAAVK(1)R	3	-0.3852	1
Q5XMB8	220	K	Cytosolic acetoacetyl-coenzyme A thiolase	1	AACT1															0.999982	0.0355073	59.673	GK(1)PSIIVDKDDGLGK	3	0.83953	1
A0A1S4AQ94	460	K	"alanine aminotransferase 2, mitochondrial-like"	1	LOC107800103	1	0.011694	69.878	AAEAAK(1)TAPDAFYAK	3	1.2297	1
A0A1S3YP75	34	K	protein RNA-directed DNA methylation 3	2	LOC107778095								1	3.21773e-11	120.86	DGYDEDK(1)TGDR	2	0.19032	1	1	0.0322442	85.522	DGYDEDK(1)TGDR	2	1.0834	1
A0A1S4BEF8	118	K	40S ribosomal protein S12	3	LOC107807381	1	2.70168e-11	122.46	DYGEETEGLHIVQEYVK(1)SH	4	0.033814	6	1	2.92626e-20	140.46	DYGEETEGLHIVQEYVK(1)SH	3	0.090992	3	1	3.73074e-10	106.87	DYGEETEGLHIVQEYVK(1)SH	4	0.27331	3
A0A1S3Y1U4	236	K	acyl-CoA-binding domain-containing protein 4 isoform X2	3	LOC107771151	1	0.019066	86.772	YNNEVYVMRPK(1)PR	2	-0.16835	1	1	0.0173696	76.728	YNNEVYVMRPK(1)PR	3	0.082794	2	1	0.00711814	84.507	YNNEVYVMRPK(1)PR	3	0.16506	1
A0A140G1X0	37	K	Photosystem I iron-sulfur center	3	psaC	1	0.00506829	83.883	AK(1)QIASAPR	2	-1.0476	2	1	0.00320275	103.55	AK(1)QIASAPR	2	-0.97048	2	1	0.00171593	122.96	AK(1)QIASAPR	2	-0.29379	2
A0A1S4DMK3	57	K	senescence-specific cysteine protease SAG39-like	1	LOC107831372								1	0.0100268	61.235	FGRVYRDDAEK(1)AK(1)R	3	-0.12913	1
A0A1S4CJC2	782	K	leucine-rich repeat receptor-like serine/threonine-protein kinase BAM1	3	LOC107819666	1	0.0215955	54.343	K(1)GGHLHWDTR	3	0.34377	1	1	0.0219582	78.548	K(1)GGHLHWDTR	2	-0.039497	1	1	0.00520093	95.477	K(1)GGHLHWDTR	2	-2.8463	1
A0A1S4CPT1	299	K	probable inactive receptor kinase At2g26730	3	LOC107821089	1	2.0337e-24	117.23	TQK(1)PPTTTAAAFTGAGEAGTSSSK(1)DDLTAEGER	4	0.031939	1	1	2.64612e-23	107.95	TQK(1)PPTTTAAAFTGAGEAGTSSSK(1)DDLTAEGER	4	-0.34242	1	1	1.3063e-24	106.66	TQK(1)PPTTTAAAFTGAGEAGTSSSK(1)DDLTAEGER	4	-0.22431	1
A0A1S3YZU3	390	K	Plasma membrane ATPase	1	LOC107781513								1	0.000409689	71.651	TENQDAIDTAIVGMLSDPK(1)EAR	3	0.55864	2
A0A1S4CM53	86	K	protein SUPPRESSOR OF K(+) TRANSPORT GROWTH DEFECT 1-like	1	LOC107820261	0.50137	0.0278967	75.509	DMAMAVK(0.501)PK(0.499)MK	2	-1.6216	1
A0A1S4CZY0	84	K	calmodulin-5-like	3	LOC107824434	1	5.13173e-37	219.89	DTDSEEELK(1)EAFR	3	0.28675	4	1	4.50002e-76	203.88	MKDTDSEEELK(1)EAFR	3	0.64781	4	1	1.75742e-06	177.83	DTDSEEELK(1)EAFR	3	0.19864	3
A0A1S4DHU6	171	K	40S ribosomal protein S10-1-like	3	LOC107829891	1	6.05892e-18	130.05	GPPGEFGGEK(1)GGAPADYQPAFR	3	-0.27514	10	1	1.43255e-20	132.6	GPPGEFGGEK(1)GGAPADYQPAFR	3	-0.0046009	15	1	7.78126e-17	118.44	GPPGEFGGEK(1)GGAPADYQPAFR	3	0.81881	16
A0A1S4AID6	186	K	Glycosyltransferase	1	LOC107798039	1	0.0260551	55.37	ALDQLPGK(1)K	2	2.1048	1
A0A1S3Z8U8	24	K	Fructose-bisphosphate aldolase	1	LOC107784214								1	0.00131172	66.308	YIATPGK(1)GILAADESTGTIGK	3	2.3971	1
A0A1S4B053	115	K	TVP38/TMEM64 family membrane protein slr0305-like isoform X2	3	LOC107803196	1	0.00831181	82.452	LK(1)DYPQFR	3	-0.26454	1	1	0.0108367	85.161	LK(1)DYPQFR	3	-0.96405	3	1	0.00651726	82.426	LK(1)DYPQFR	3	0.10983	2
A0A1S4DHU6	120	K	40S ribosomal protein S10-1-like	1	LOC107829891	1	0.0178615	126.24	K(1)SAKPLGR	2	-0.32819	1
A0A1S3XR77	334	K	Peptidylprolyl isomerase	1	LOC107767805															0.964692	0.0344234	51.979	LVDFNK(0.035)EK(0.965)PFWK	3	1.1713	1
A0A1S4BZP5	463	K	putative potassium transporter 12 isoform X4	2	LOC107813511								1	0.000168821	81.854	QK(1)ISMDFMHELGSSLGTVR	3	-0.38735	2	1	3.04273e-08	98.391	QK(1)ISMDFMHELGSSLGTVR	3	0.11262	1
A0A1S3YD84	177	K	Calcium-transporting ATPase	2	LOC107774818	1	0.00760208	89.301	GIDGDEVDLLK(1)R	2	3.7355	2	1	0.0269515	52.79	GIDGDEVDLLK(1)R	3	-0.55238	1
A0A1S3XIJ3	33	K	uncharacterized protein At2g23090-like	1	LOC107765588															1	0.0289358	73.248	K(1)AMSIQCK	2	-0.98824	1
O04899	214	K	Caffeoyl-CoA O-methyltransferase 5	2	CCOAOMT5								1	0.00176137	73.834	DFVLELNK(1)ALAADPR	3	-1.1228	1	1	0.0207902	51.771	DFVLELNK(1)ALAADPR	3	-0.17305	1
A0A1S4BS12	95	K	MLP-like protein 423	2	LOC107811017	1	0.000423506	86.548	TVVYSVIDGETMK(1)YYK	2	0.15651	2								1	7.844e-05	97.767	TVVYSVIDGETMK(1)YYK	2	-0.73877	3
Q84QE8	127	K	Oxygen evolving complex 33 kDa photosystem II protein	3	PsbO	1	0.0188454	42.254	GTGTANQCPTIEGGVASFAFK(1)PGK	3	1.1947	1	1	0.00562593	57.981	GTGTANQCPTIEGGVASFAFK(1)PGK	3	1.0306	1	1	7.04563e-07	77.576	GTGTANQCPTIEGGVASFAFK(1)PGK	3	0.75449	1
A0A1S3XTB8	567	K	heat shock cognate 70 kDa protein 2-like	2	LOC107768506	0.999919	0.00652868	95.094	IGSK(1)LSPDDKK	2	0.80221	1	0.999989	0.000613254	97.957	IGSK(1)LSPDDKK	2	0.1819	1
A0A1S4DN58	445	K	Plasma membrane ATPase	2	LOC107831565	1	0.00912244	77.318	K(1)VHAMIDK	3	-0.88305	1	1	0.0195691	67.494	K(1)VHAMIDK	3	0.62509	1
A0A1S3YGN2	4	K	RPM1-interacting protein 4-like isoform X2	1	LOC107776106								1	0.0111338	68.371	SEK(1)GQPLPK	2	-0.11801	1
A0A1S4CZF0	21	K	copper transport protein ATX1-like isoform X1	3	LOC107824312	1	9.26617e-05	113.07	VGMSCQGCVGAVK(1)R	2	-1.1424	3	1	0.000129087	107.93	VGMSCQGCVGAVK(1)R	2	-1.8824	3	1	0.000139179	113.24	VGMSCQGCVGAVK(1)R	2	-0.64914	3
A0A1S4BN22	335	K	S-adenosylmethionine synthase	2	LOC107810046								0.999997	0.000176111	121.68	IPDKEILK(1)IVK	3	-0.069289	2	0.999945	0.014113	79.23	IPDKEILK(1)IVK	3	0.079192	1
A0A1S4B198	242	K	uncharacterized isomerase BH0283-like isoform X5	1	LOC107803402								1	0.0240357	49.333	GGVVK(1)VHLDEENQR	3	0.078189	1
A0A1S4AFG1	163	K	Tubulin alpha chain	2	LOC107797065	1	0.00726383	104.44	LSVDYGK(1)K	2	-0.64213	1	1	0.0111083	114.28	LSVDYGK(1)K	2	-0.17618	1
A0A1S3ZJI7	9	K	transcription factor MYB23-like	1	LOC107787587															0.98997	0.0185065	62.166	PTVDK(0.99)PK(0.014)QK(0.996)HK	3	-0.52537	1
A0A1S4BEY9	127	K	Histone H2A	2	LOC107807559	0.932959	0.00818402	74.296	K(0.933)AGSGK(0.067)GDIGSASQEF	3	-0.40523	1								0.839994	0.0013531	86.548	K(0.84)AGSGK(0.16)GDIGSASQEF	2	-0.16439	1
A0A1S4C7U4	7	K	uncharacterized protein LOC107816147	1	LOC107816147															0.98982	0.0350295	47.96	MPLFPWK(0.99)K(0.01)VK	3	1.3819	1
A0A1S4CAZ2	343	K	"GDP-mannose 3,5-epimerase 1-like"	2	LOC107817046	1	0.0128653	57.148	EK(1)SQGVNIANYGSSK	3	-0.44794	1								1	0.0126334	55.546	EK(1)SQGVNIANYGSSK	3	0.18838	1
Q6Q8A6	161	K	Phosphotransferase	2	Hxk1a								1	0.0127448	55.724	FVAEEEEK(1)FQQPPGK	3	0.010375	1	1	0.0109514	57.267	FVAEEEEK(1)FQQPPGK	3	0.776	1
A0A1S3ZHH6	83	K	protein ECERIFERUM 1-like	1	LOC107786899	1	0.0318343	66.393	IVDK(1)SIEFDQVDR	3	-1.7345	1
D6PZY5	55	K	RNA-binding glycine-rich protein	2	RGP-1a	1	0.011693	83.045	GFGFVTFK(1)DEK	2	0.31521	1								1	0.0187157	57.149	GFGFVTFK(1)DEK	3	0.22683	1
A0A1S4B1K7	63	K	5-oxoprolinase-like	2	LOC107803589								1	0.00408615	98.182	ILEEFTGK(1)K(1)IPR	3	-0.60475	1	1	0.00779194	74.962	ILEEFTGK(1)K(1)IPR	3	-0.11174	1
A0A1S4AXD3	107	K	Histone H2B	1	LOC107802329								0.957275	0.0267215	72.096	YNK(0.957)K(0.043)PTITSR	3	0.95202	1
A0A1S3ZHQ7	110	K	Proteasome subunit alpha type	3	LOC107786909	1	1.28019e-08	96.881	SEATNFESTYGEPIPVK(1)ELAER	3	-0.70441	1	1	0.000738337	68.42	SEATNFESTYGEPIPVK(1)ELAER	3	-0.52704	1	1	0.00026849	74.742	SEATNFESTYGEPIPVK(1)ELAER	3	0.29647	1
A0A1S3ZGP0	316	K	calcium-dependent protein kinase 11-like	1	LOC107786544	1	0.0299471	46.892	QFCDMNK(1)LK(1)K(1)MALRVIAER	3	2.8236	1
A0A1S3ZXY2	83	K	cell division cycle protein 48 homolog isoform X2	2	LOC107791620								1	3.19538e-07	110.57	LGDVVSVHQCPDVK(1)YGK	3	-0.23993	1	1	0.0157452	52.172	LGDVVSVHQCPDVK(1)YGK	3	0.12613	1
A0A1S3ZT25	332	K	uncharacterized protein LOC107790103	1	LOC107790103															1	0.0328959	53.751	AK(1)K(1)MPEEWR	2	-2.22	1
A0A1S4AW62	7	K	Sulfotransferase	1	LOC107801942								1	0.0175556	44.44	VTNVLK(1)ENSTTRQTR	3	-3.954	1
Q9ST22	250	K	Phospate transporter	3	LOC107828779	1	0.00263384	100.09	NLK(1)QAANDMSK	2	-0.5857	1	1	0.00561657	83.045	NLK(1)QAANDMSK	2	0.066132	2	1	0.0335123	84.605	NLK(1)QAANDMSK	2	0.54041	1
A0A1S4A5R5	546	K	nephrocystin-3-like	3	LOC107794015	1	0.0276505	60.09	LREEK(1)LGTANPDFDDEK	3	-0.079704	1	1	0.00299083	79.332	LREEK(1)LGTANPDFDDEK	3	0.032385	1	1	0.00470014	73.918	LREEK(1)LGTANPDFDDEK	3	0.53107	1
A0A1S4BYQ0	300	K	Glyceraldehyde-3-phosphate dehydrogenase	1	LOC107813294								1	0.00423425	91.812	SSIFDAK(1)AGIALSK	2	-1.0706	2
A0A1S4BI04	95	K	inositol-3-phosphate synthase-like	1	LOC107808474								1	0.00117302	72.359	EK(1)VQQANYFGSLTQASTIR	3	0.29818	1
A0A1S4ARC4	447	K	Serine hydroxymethyltransferase	2	LOC107800464	1	0.00570928	92.943	EIEELK(1)ADVEK	2	1.002	1	1	1.1124e-17	154.15	EIEELK(1)ADVEK	2	0.84387	1
A0A1S3ZYM9	400	K	5-methyltetrahydropteroyltriglutamate-- homocysteine methyltransferase-like	3	LOC107791827	1	7.5639e-14	130.95	VTNEAVQK(1)ASAALQGSDHR	3	-0.2288	3	1	5.15684e-10	111.82	VTNEAVQK(1)ASAALQGSDHR	4	-0.78769	5	1	8.28697e-13	166.3	VTNEAVQK(1)ASAALQGSDHR	3	0.32004	4
A0A1S4DB02	123	K	uncharacterized protein LOC107827840	1	LOC107827840															1	0.0193082	61.56	DIK(1)EIVANK(1)R	3	0.17857	1
A0A1S3WXS1	69	K	14-3-3 protein 9-like isoform X2	1	LOC107759102	1	5.1342e-62	244	ILSSIEQK(1)EESR	2	0.23977	8
A0A1S4BZH8	203	K	Phosphoglycerate kinase	1	LOC107813429															0.562216	0.0137005	69.258	FYK(0.438)EEEK(0.562)NEPEFAK	3	-0.91459	1
A0A1S4ADW0	439	K	Plasma membrane ATPase	3	LOC107796542	1	4.86401e-10	141.55	GAPEQILDLCNAK(1)EDVRR	3	0.16551	9	1	7.83699e-16	135.72	GAPEQILDLCNAK(1)EDVRR	3	-0.19554	7	1	5.23858e-13	195.6	GAPEQILDLCNAK(1)EDVRR	4	-0.060865	8
A0A1S3ZQP2	67	K	MACPF domain-containing protein NSL1-like	1	LOC107789400	0.999925	0.024154	51.225	DLVVPGGVVVSK(1)VSTSIKCDK	4	-2.6968	1
A0A1S3YBG9	75	K	NADH dehydrogenase [ubiquinone] 1 alpha subcomplex subunit 12	1	LOC107774558	0.999247	0.0355885	44.367	MAK(0.003)EGK(0.998)SK(0.999)ATSIGK	2	-3.6758	1
A0A1S4CHQ3	54	K	vesicle transport v-SNARE 13-like	2	LOC107818974	1	0.0232292	91.069	K(1)MDLEAR	2	-1.0995	1	1	0.0227996	111.82	K(1)MDLEAR	2	0.47749	1
A0A1S4DGI2	70	K	syntaxin-132-like isoform X2	1	LOC107829653	0.999252	0.0267832	47.222	DANEESK(0.999)SVTK(0.494)ASAMK(0.507)AIR	3	0.045021	1
A0A077DCK9	67	K	Carbonic anhydrase	1	LOC107821152															1	2.53961e-08	145.29	QLTAELEGAGGK(1)K	2	-0.27946	2
A0A1S4AEI5	156	K	vesicle-associated membrane protein 727	1	LOC107796795	1	0.0255265	87.258	LK(1)AQITEVK	2	-0.29797	1
A0A1S3Z1Q4	154	K	Peptidylprolyl isomerase	2	LOC107782047	1	0.00198092	89.44	VK(1)VITADLGVLK	3	0.37027	1								1	0.00817803	66.393	VK(1)VITADLGVLK	3	-0.26644	1
A0A077DCK9	89	K	Carbonic anhydrase	1	LOC107821152															1	0.00221489	78.287	YEK(1)NPELFGQLAK	3	0.2662	1
P41919	102	K	GTP-binding nuclear protein Ran-B1	3	RAN-B1	1	0.00385256	81.92	LTYK(1)NVPTWHR	4	-1.5615	3	1	0.00287455	87.568	LTYK(1)NVPTWHR	4	-1.9036	2	1	0.00968477	65.232	LTYK(1)NVPTWHR	3	-0.26092	1
A0A1S4BQ99	278	K	"alpha-1,4-glucan-protein synthase [UDP-forming] 2"	2	LOC107810758	1	0.00720546	96.665	ASNPFVNLK(1)K	2	0.22862	1								1	0.0114659	95.775	ASNPFVNLK(1)K	2	-0.34542	1
A0A1S3YV19	290	K	Glyceraldehyde-3-phosphate dehydrogenase	3	LOC107780142	1	0.00289545	84.507	AVALVLPSLK(1)GK	3	-0.46046	1	1	0.00200419	88.155	AVALVLPSLK(1)GK	3	-0.059248	1	1	0.000230278	108.7	AVALVLPSLK(1)GK	3	-0.33383	2
A0A1S4B7M2	22	K	glycerate dehydrogenase	3	LOC107805344	1	0.0121411	65.179	VVSTK(1)SMPGTR	3	0.063087	1	1	0.00400538	81.525	VVSTK(1)SMPGTR	3	0.90703	1	1	0.00762843	98.156	VVSTK(1)SMPGTR	2	-0.026437	2
A0A1S4CIF1	13	K	ubiquitin-conjugating enzyme E2 7 isoform X2	1	LOC107819396								1	4.96519e-18	147.1	ASASQASLLLQK(1)QLK	2	0.26716	1
Q7XZV3	41	K	24K germin like protein	1	LOC107773727								1	0.000784177	69.088	K(1)PSAVTANDFVFSGLATPVK	3	0.36524	1
A0A1S3ZGP8	331	K	S-adenosylmethionine synthase	1	LOC107786628	1	0.0141432	69.878	TGTIPDK(1)DILALIK	2	-0.14431	1
A0A1S4AXR4	175	K	putative clathrin assembly protein At2g01600	3	LOC107802460	1	5.92268e-06	137.62	LPKPAQGQEK(1)GYSK	3	0.25976	6	1	2.44386e-21	155.08	LPKPAQGQEK(1)GYSK	3	0.088429	6	1	6.00036e-09	150.26	LPKPAQGQEK(1)GYSK	3	0.55582	3
A0A1S4B9E2	157	K	induced stolen tip protein TUB8-like	2	LOC107805948	1	0.00725716	101.72	AVPVEK(1)AEE	2	0.84237	2	1	0.0276941	84.615	AVPVEK(1)AEE	2	0.77419	1
A0A1S4DMK3	55	K	senescence-specific cysteine protease SAG39-like	1	LOC107831372								1	0.0100268	61.235	FGRVYRDDAEK(1)AK(1)R	3	-0.12913	1
A0A140G1U3	308	K	Photosystem II CP47 reaction center protein	2	psbB								1	0.00607317	59.252	IPEK(1)LAFYDYIGNNPAK	3	-0.0055502	1	1	0.0287337	46.337	IPEK(1)LAFYDYIGNNPAK	3	-0.45085	1
A0A1S4D284	324	K	TOM1-like protein 2	3	LOC107825217	1	5.46181e-07	101.49	TPEDGSGLPNTAPEAGEK(1)LPK	3	0.52371	3	1	3.8327e-17	125.23	TPEDGSGLPNTAPEAGEK(1)LPK	2	-0.080738	3	1	6.576e-08	95.365	TPEDGSGLPNTAPEAGEK(1)LPK	3	-0.17713	3
A0A1S4BLM1	575	K	"outer envelope protein 64, chloroplastic-like"	1	LOC107809634															1	0.00147527	99.973	YALVLEPTNK(1)R	3	-0.070712	1
A0A1S4AXD3	68	K	Histone H2B	2	LOC107802329	1	0.0236534	51.073	VLK(1)QVHPDIGISSK	3	-0.5008	1	1	0.0280811	46.66	VLK(1)QVHPDIGISSK	3	-0.13385	1
A0A1S4AXE4	143	K	Plasma membrane ATPase	2	LOC107802334								0.953678	0.000145579	65.416	DGK(0.954)WK(0.046)EEDAAVLVPGDIISIK	3	0.6877	2	0.74184	0.00201969	73.672	DGK(0.742)WK(0.258)EEDAAVLVPGDIISIK	3	0.99416	1
A0A1S4DDG4	85	K	"Chlorophyll a-b binding protein, chloroplastic"	2	LOC107828640								1	0.00240806	91.265	YK(1)ESELIHCR	3	-0.25556	2	1	0.00489549	72.243	YK(1)ESELIHCR	3	0.30501	2
A0A1S4BYR7	969	K	Alanine--tRNA ligase	1	LOC107813253								1	0.0155092	65.809	VLVCAGVPEK(1)GDK	3	2.2489	2
A0A1S3Y8R3	306	K	8-hydroxygeraniol dehydrogenase-like	1	LOC107773552	1	0.0169909	44.759	K(1)LVAGSAIGGIK(1)ETQEMLDFASK	3	2.0272	1
A0A1S3YV19	89	K	Glyceraldehyde-3-phosphate dehydrogenase	2	LOC107780142	1	0.000552181	93.371	K(1)DSPLDVIAINDTGGVK	2	-0.95418	1	1	0.0355182	55.688	K(1)DSPLDVIAINDTGGVK	2	-1.0943	1
A0A1S4BFD9	147	K	Peptidyl-prolyl cis-trans isomerase	2	LOC107807631	1	0.0047148	63.682	HVVFGQVIEGMDVIK(1)K	3	-1.8128	1								1	0.000756609	83.292	HVVFGQVIEGMDVIK(1)K	3	-1.3757	2
A0A1S3X8E3	344	K	uncharacterized protein LOC107762331	1	LOC107762331	0.986843	0.0242942	52.372	GDK(0.006)NTK(0.007)FFQRVANAHK(0.987)R	3	-0.43951	1
A0A1S4B5W8	63	K	actin-97-like	1	LOC107804820															1	9.2506e-11	138.42	HTGVMVGMGQK(1)DAYVGDEAQSK(1)R	3	1.5258	4
A0A1S3YL98	47	K	glutathione S-transferase DHAR2-like	1	LOC107777254								0.813328	0.000807151	75.017	MHLINVSDK(0.813)PK(0.187)WFLEVNPEGK	4	0.54799	2
A0A1S3ZW91	41	K	uncharacterized protein LOC107791111	1	LOC107791111															1	0.0238908	47.712	QK(1)LMLDIK(1)LMVK(1)R	3	4.3287	1
A0A1S4B2J7	530	K	heat shock cognate 70 kDa protein 2	1	LOC107803885								1	1.90364e-26	154.81	MVQEAEK(1)YK	2	3.0337	15
A0A1S4CNA4	4	K	pathogenesis-related genes transcriptional activator PTI6-like	1	LOC107820911															0.99849	0.0297979	41.996	EGK(0.998)FSQSIK(0.172)K(0.83)CVVHR	3	2.5272	1
A0A1S4BKX8	8	K	Cellulose synthase	1	LOC107809423															1	0.023972	54.259	MDPEADVK(1)GK	2	-0.2047	1
A0A1S3Y9C0	140	K	la protein 1-like	1	LOC107773773															1	0.0186097	49.537	LEDVESFFGQHGK(1)VNSVR	3	1.113	1
A0A1S4B3P0	121	K	uncharacterized protein LOC107804143	1	LOC107804143								1	0.0245191	55.806	IIYEK(1)TNIELK	3	1.6084	1
A0A1S4CHD1	62	K	40S ribosomal protein S3-1-like	3	LOC107819043	1	0.000584434	172.27	TQNVLGEK(1)GRR	3	-0.41439	5	1	3.66139e-30	173.24	TQNVLGEK(1)GRR	3	-0.38011	7	1	0.000288407	136.02	TQNVLGEK(1)GRR	3	-0.27884	6
A0A1S4DK35	69	K	"triosephosphate isomerase, cytosolic isoform X2"	2	LOC107830628	1	0.00113051	83.751	NELRPDFHVAAQNCWVK(1)K	4	0.27465	1	1	0.000386666	86.367	NELRPDFHVAAQNCWVK(1)K	4	-0.60241	1
A0A1S4AXD3	138	K	Histone H2B	3	LOC107802329	1	0.000153763	130.1	HAVSEGTK(1)AVTK	2	1.0812	2	1	0.000692492	112.02	HAVSEGTK(1)AVTK	2	0.23952	2	1	9.64486e-05	119.03	HAVSEGTK(1)AVTK	2	0.4328	2
A0A1S3X5I0	33	K	Carbonic anhydrase	2	LOC107761423	1	1.17772e-07	157.37	LLSEK(1)NELEDAAVAK	2	0.24303	7	1	4.82642e-15	141.59	LLSEK(1)NELEDAAVAK	2	0.23791	7
A0A140G1X0	6	K	Photosystem I iron-sulfur center	3	psaC	1	5.38504e-09	121.51	SHSVK(1)IYDTCIGCTQCVR	4	0.5367	3	1	1.85324e-07	108.34	SHSVK(1)IYDTCIGCTQCVR	4	-0.77864	1	1	6.3899e-13	145.91	SHSVK(1)IYDTCIGCTQCVR	4	-0.1498	4
I7GVS5	530	K	Heat shock protein 70	2	NtHsp70	1	7.64648e-09	145.7	MVQEAEK(1)YK	2	-0.36163	10								1	1.25164e-11	145.1	MVQEAEK(1)YK	2	0.84572	8
A0A1S4AI09	488	K	Glutamate decarboxylase	1	LOC107797840								1	0.0194797	76.847	DILK(1)HWR	3	0.074678	1
A0A1S4DPW3	193	K	uncharacterized protein LOC107832168	3	LOC107832168	1	2.39199e-32	169.65	K(1)SMEEVPVNSR	2	0.026869	4	1	6.52031e-09	135.1	K(1)SMEEVPVNSR	2	0.54013	5	1	0.00191161	171.49	K(1)SMEEVPVNSR	3	0.32369	4
A0A1S4AKW3	223	K	"ribulose bisphosphate carboxylase/oxygenase activase 2, chloroplastic-like"	2	LOC107798764	1	0.00121848	76.586	K(1)GNMCCLFINDLDAGAGR	3	0.06008	1	1	1.48354e-16	136.63	K(1)GNMCCLFINDLDAGAGR	3	0.23275	1
A0A1S4C8D4	178	K	protein EXPORTIN 1A-like	3	LOC107816191	1	7.52687e-06	119.17	ETMKDNDVLVQYK(1)IMR	3	0.4917	1	1	0.000401677	93.478	ETMKDNDVLVQYK(1)IMR	3	0.017815	2	0.999958	0.00152271	84.759	ETMKDNDVLVQYK(1)IMR	3	0.36079	2
A0A1S4A347	112	K	HVA22-like protein	3	LOC107793218	1	0.00169714	96.143	K(1)AVNIWYVPR	2	-0.57326	4	1	0.00653776	98.048	K(1)AVNIWYVPR	2	-0.56598	3	1	0.000531572	106.88	K(1)AVNIWYVPR	2	-0.31712	2
A0A1S4ACA6	340	K	protein argonaute 4-like	1	LOC107796081	1	0.0192929	61.096	GK(1)DGEGDEITVYDYFVNHR	3	0.55274	1
A0A1S4D9A7	743	K	uncharacterized protein LOC107827401	1	LOC107827401	1	0.0358878	47.537	RLMNLEDDMK(1)NMRNLRAK	3	-0.50903	1
Q9AT16	16	K	Ankyrin-repeat protein HBP1	1	LOC107793888															1	0.00254135	65.511	VLPTASADEK(1)SGASENK	3	1	1
A0A1S4CHQ3	21	K	vesicle transport v-SNARE 13-like	2	LOC107818974	1	0.0218842	52.79	QYCELSANLTK(1)K	3	-0.58403	1								1	0.00380283	84.365	QYCELSANLTK(1)K	3	0.41924	2
A0A1S4C023	39	K	DEAD-box ATP-dependent RNA helicase 56-like isoform X1	2	LOC107813637	1	0.000560507	98.407	K(1)GYVGIHSSGFR	3	-1.1189	1	1	0.00785685	86.772	K(1)GYVGIHSSGFR	2	-0.040774	1
A0A1S4D8N6	261	K	putative pentatricopeptide repeat-containing protein At1g02420	1	LOC107827160								0.999968	0.0231185	60.161	EMEK(1)AFK(0.045)VVK(0.955)EMR	3	-1.3786	1
A0A1S4BK93	497	K	"cationic amino acid transporter 2, vacuolar-like isoform X2"	1	LOC107809198								1	0.0332027	57.55	AAAK(1)LNYLVR	3	-0.32768	1
A0A1S4AVF7	293	K	"putative quinone-oxidoreductase homolog, chloroplastic"	1	LOC107801723								1	0.00129943	94.82	TVIDSK(1)HPLSK	3	0.50851	1
A0A1S3XHP2	188	K	uncharacterized protein LOC107765259 isoform X2	2	LOC107765259	0.99925	4.82131e-13	131.82	AAEEDALK(0.001)K(0.999)PNNDFDANEK	3	-0.22134	1	0.981173	0.0156315	58.427	AAEEDALK(0.019)K(0.981)PNNDFDANEK	3	-0.36258	1
A0A1S4AAR0	669	K	uncharacterized protein LOC107795530	1	LOC107795530								1	0.0303006	46.159	K(1)MIDETQETLR	3	1.2177	1
A0A1S4D0S8	140	K	remorin-like	2	LOC107824746	1	0.00874878	100.02	ANLEAELK(1)K	3	-0.7223	3	1	0.00379388	112.83	ANLEAELK(1)K	3	-0.62715	5
A0A1S4A347	122	K	HVA22-like protein	3	LOC107793218	0.999967	0.000245181	101.54	K(1)K(1)DVFSKPDDILTAAEK	4	0.24784	4	0.999835	8.68402e-05	97.083	K(1)K(1)DVFSKPDDILTAAEK	3	1.3195	6	0.999239	1.63271e-07	111.73	K(0.999)K(0.999)DVFSK(0.002)PDDILTAAEK	4	0.15917	3
A0A1S4AP74	125	K	V-type proton ATPase subunit a	1	LOC107799704															1	0.000101404	80.541	LGELEAELIEINANGDK(1)LQR	3	-1.1644	1
A0A1S4AXD5	40	K	Small ubiquitin-related modifier	3	LOC107802245	1	0.000275742	113.4	STQLK(1)K(1)LMNAYCDR	3	-0.30156	1	1	0.00167942	98.943	STQLK(1)K(1)LMNAYCDR	3	0.23066	1	1	0.00108068	94.717	STQLK(1)K(1)LMNAYCDR	3	-1.1762	1
L0SQ20	227	K	Catalase	1	cat1	1	0.0260213	53.124	FHWK(1)PTCGVK	3	-0.085722	2
A0A1S4AZJ3	406	K	Lipoxygenase	1	LOC107803018															1	0.00687083	61.444	LDPK(1)VYGNQTSSITR	3	0.046062	1
A0A1S4ABN0	13	K	protein DETOXIFICATION 27-like	3	LOC107795825	1	0.00362106	85.271	VANELGAGNGK(1)GAK	2	0.57882	1	1	9.93243e-06	117.27	VANELGAGNGK(1)GAK	2	-0.81429	2	1	3.74129e-06	126.32	VANELGAGNGK(1)GAK	3	-0.46113	2
P18212	147	K	"Oxygen-evolving enhancer protein 2-2, chloroplastic"	1	PSBP2	1	0.0136542	54.834	FEDNFDATSNVIVAITPTDK(1)K	3	-0.24867	1
A0A1S4D0B4	788	K	receptor-like kinase TMK4	2	LOC107824488	1	4.40482e-05	94.45	K(1)AIDPILDPDDETYESISK	3	0.06434	2								1	3.00094e-06	92.563	K(1)AIDPILDPDDETYESISK	3	0.36128	2
A0A1S3ZNF7	29	K	polyubiquitin-like	3	LOC107788853	1	1.24655e-06	157.37	AK(1)IQDK(1)EGIPPDQQR	3	0.20798	23	1	3.91231e-93	206.49	AK(1)IQDK(1)EGIPPDQQR	3	-1.1384	40	1	1.55771e-29	230.96	AK(1)IQDK(1)EGIPPDQQR	3	-0.29744	47
A0A1S3ZDP1	39	K	Serine/threonine-protein phosphatase	3	LOC107785560	1	1.15425e-09	172.91	AK(1)EILMEESNVQPVK	2	0.41487	7	1	7.18549e-18	147.51	AK(1)EILMEESNVQPVK	3	-0.28101	6	1	2.5809e-07	151.8	AK(1)EILMEESNVQPVK	2	0.23934	6
A0A1S3Y5V8	107	K	60S acidic ribosomal protein P0	1	LOC107772468								1	3.60771e-05	109.66	EVSEEVAK(1)YK	2	0.67862	1
A0A1S4B5W8	233	K	actin-97-like	2	LOC107804820	1	2.22941e-07	98.543	LAYIALDYEQELETAK(1)TSSSVEK	3	-0.055781	3								1	0.000689477	65.833	LAYIALDYEQELETAK(1)TSSSVEK	3	0.063893	2
Q9LW96	396	K	Inositol-3-phosphate synthase	3		1	0.00141529	102.06	YVPYVGDSK(1)R	2	-0.3834	3	1	7.27477e-09	140.17	YVPYVGDSK(1)R	2	-0.71656	2	1	0.00468708	85.807	YVPYVGDSK(1)R	3	-0.30371	1
A0A1S3ZYK1	59	K	elongation factor 1-delta 1-like isoform X2	1	LOC107791787															1	0.0302634	49.3	WYK(1)HIDALLR	3	-0.27958	1
A0A1S4AB59	654	K	DELLA protein RGL1-like	1	LOC107795633	1	0.0210119	86.833	LMEGK(1)GFK	2	0.27866	2
A0A1S4BZP5	3	K	putative potassium transporter 12 isoform X4	1	LOC107813511															1	0.0156878	53.255	GK(1)GEIEESSSTVGLLK	3	-0.33561	1
A0A1S4C023	270	K	DEAD-box ATP-dependent RNA helicase 56-like isoform X1	1	LOC107813637								1	0.00544932	57.173	LTLHGLVQHYIK(1)LSETEK	4	-0.091503	1
A0A1S4CS69	4	K	DNA-directed RNA polymerases IV and V subunit 4-like	1	LOC107822131															1	0.0158824	57.567	AEK(1)GGK(1)GFSLPK	3	0.20414	2
A0A1S3ZIW1	670	K	CSC1-like protein ERD4 isoform X2	3	LOC107787373	1	8.0511e-05	66.613	SFIPPCLSAGK(1)SDDHQFEDALSHVSK	3	1.2522	4	1	1.06312e-06	82.302	SFIPPCLSAGK(1)SDDHQFEDALSHVSK	5	-0.5508	4	1	0.000553004	55.588	SFIPPCLSAGK(1)SDDHQFEDALSHVSK	4	-0.14508	2
A0A1S4CU07	32	K	Cysteine proteinase inhibitor	2	LOC107822566	1	0.00564484	84.615	FAVDEHNK(1)K	2	0.25974	1	1	0.0310978	74.165	FAVDEHNK(1)K	2	0.17441	1
A0A1S4DM13	433	K	Signal recognition particle 54 kDa protein	2	LOC107831230	0.975526	0.0189749	58.172	IWSK(0.834)MK(0.976)GLK(0.19)IPK	2	0.031947	1	0.998819	0.0154256	58.172	IWSK(0.999)MK(0.999)GLK(0.002)IPK	2	0.43418	1
A0A1S4DNC9	267	K	extra-large guanine nucleotide-binding protein 1-like	1	LOC107831660															0.990007	0.0279399	85.212	PK(0.99)K(0.01)EPAVK	2	-0.69706	1
A0A1S4D0V6	280	K	casein kinase I-like	1	LOC107824782								1	0.00185358	75.376	DTSK(1)GQHVGYDQRPDTFR	3	0.63684	1
A0A1S3ZNT0	317	K	protein STRUBBELIG-RECEPTOR FAMILY 6-like	2	LOC107788961								1	4.84389e-07	82.267	TNQASSAPSVK(1)TFEAPAVVNLRPPPIER	4	-0.45552	2	1	4.07805e-17	95.926	TNQASSAPSVK(1)TFEAPAVVNLRPPPIER	3	-0.28518	2
A0A1S4B8Z5	182	K	WEB family protein At2g38370-like	1	LOC107805795															0.778249	0.0349114	42.785	MK(0.778)K(0.218)DK(0.004)VMLDRSSQR	3	2.6554	1
A0A1S3ZUI8	474	K	heat shock cognate protein 80-like	1	LOC107790625								1	6.66361e-07	132.56	K(1)AVENSPFLEK	2	1.3194	3
A0A1S4B3E6	100	K	Sucrose synthase	3	LOC107804066	1	0.000102594	101.01	PRPGVWEYLSLNLK(1)TK	3	-1.016	2	1	2.76955e-06	115.87	PRPGVWEYLSLNLK(1)TK	4	0.037381	2	1	8.4914e-08	117.48	PRPGVWEYLSLNLK(1)TK	4	-0.1736	1
A0A1S3YRF4	491	K	Aconitate hydratase	2	LOC107778837	1	0.0188163	54.094	SDWHSCLDNK(1)VGFK	3	0.54992	1								1	0.00438376	81.703	SDWHSCLDNK(1)VGFK	3	1.0069	1
A0A1S4BDA7	206	K	"2-Cys peroxiredoxin BAS1, chloroplastic"	1	LOC107807034															1	6.35258e-21	126.04	GLFIIDK(1)EGVIQHSTINNLGIGR	4	0.052734	4
A0A1S3YBZ7	79	K	peptidyl-prolyl cis-trans isomerase CYP95-like isoform X6	1	LOC107774496															1	0.0321195	67.035	LK(1)NGK(1)HK	2	-0.82412	1
A0A1S4C2N7	379	K	uncharacterized protein LOC107814518	1	LOC107814518															1	0.0304742	51.009	VLK(1)GNFGNPK(1)QPEVK	4	0.042349	1
A0A1S3X3V1	187	K	Clathrin light chain	1	LOC107760966															1	0.00618841	70.808	LYLSNQEK(1)FHK	3	0.18828	1
A0A1S3ZDB8	384	K	S-adenosylmethionine synthase	1	LOC107785513								0.997453	1.71521e-05	108.58	DDPDFTWETVK(0.997)VLK(0.003)PK	3	0.7545	2
A9YTW2	132	K	Putative chlorophyllase	2	LOC107817300	1	0.0280889	48.998	K(1)LGLAGHSR	3	-0.66207	1								1	0.0142564	70.399	K(1)LGLAGHSR	3	-0.54804	1
A0A1S4DMY9	150	K	60S ribosomal protein L19-2	2	LOC107831514								1	0.00660681	84.821	EK(1)TLSDQFEAR	3	0.34969	1	1	0.00321688	80.014	EK(1)TLSDQFEAR	3	0.4946	2
A0A1S4AET6	102	K	Proteasome subunit alpha type	1	LOC107796873								1	0.0212887	53.136	LYK(1)EPIPVTQLVR	3	-0.21612	1
A0A1S3XDP9	37	K	peroxiredoxin-2B-like	1	LOC107763907								1	0.00058658	75.682	K(1)VILFAVPGAFTPTCSTK	3	-0.071706	1
A0A1S3Y8J6	25	K	Phosphomannomutase	1	LOC107773479	1	0.0207847	56.956	DGK(1)LIGTQSLK	3	1.3737	1
A0A1S4BQ72	47	K	uncharacterized protein LOC107810719	1	LOC107810719								1	0.0243991	75.043	K(1)PTVK(1)QVK	2	0.80751	1
A0A1S4BQD1	75	K	uncharacterized protein C167.05-like	3	LOC107810745	1	0.019193	54.225	K(1)YGVNPDPETLDMVTLAAR	3	-1.7206	1	1	7.55204e-05	85.203	K(1)YGVNPDPETLDMVTLAAR	3	0.67613	2	1	2.67201e-05	84.436	K(1)YGVNPDPETLDMVTLAAR	3	1.295	1
A0A1S4B745	127	K	pyridoxal 5'-phosphate synthase subunit PDX1	3	LOC107805188	1	0.000273676	107.65	NMDDDEVFTFAK(1)K	2	-0.2387	4	1	1.37399e-07	126.32	NMDDDEVFTFAK(1)K	2	-0.3187	6	1	0.00177568	87.719	NMDDDEVFTFAK(1)K	2	0.029577	6
A0A1S4DJD0	7	K	vacuolar iron transporter 1-like	2	LOC107830460								1	0.000318142	104.94	AHESEK(1)SLLDQHK	3	-0.5294	2	1	0.0118146	56.139	AHESEK(1)SLLDQHK	3	0.032139	1
A0A1S4DDI9	303	K	mRNA-binding protein PUF3-like	1	LOC107828664								0.964444	0.0301675	54.094	NEIK(0.039)MERLQEK(0.964)K(0.997)PAR	2	-3.2089	1
A0A1S4A9Y6	454	K	Cellulose synthase	3	LOC107795298	1	0.0174845	61.78	VQPSFVK(1)ER	3	0.2281	1	1	0.0168971	62.463	VQPSFVK(1)ER	3	0.58899	1	1	0.00414042	83.998	VQPSFVK(1)ER	3	0.15696	1
A0A1S3XKQ6	25	K	"lysine--tRNA ligase, cytoplasmic-like"	1	LOC107766273	0.920632	0.0325133	46.461	K(0.003)GK(0.077)SENK(0.921)PSTQSQK(1)HVAAGDK	3	1.7979	1
Q68GS0	51	K	SKP1	1	SKP1	1	0.000274113	66.906	HMIEDDCADTSIPLPNVTSK(1)ILAK	3	0.98912	2
A0A1S4D9A2	254	K	elongation factor 1-gamma 2-like isoform X1	2	LOC107827359								1	0.00496357	80.507	FEEEEEAPK(1)PK	3	-0.1707	3	1	0.00480548	73.841	FEEEEEAPK(1)PK	3	1.0561	1
A0A1S3YH29	94	K	plasma membrane-associated cation-binding protein 1-like	3	LOC107776048	1	0.0282914	48.608	FLDELVK(1)IEFPGSK	3	0.52329	1	1	0.00250075	72.209	FLDELVK(1)IEFPGSK	3	0.17234	2	1	1.05811e-05	113.54	FLDELVK(1)IEFPGSK	3	0.76406	2
A0A1S4AYN5	128	K	60S ribosomal protein L9-1	2	LOC107802737	1	0.0168925	56.569	K(1)VDMLDGVTVVR	3	0.45556	1	1	0.0325943	49.483	K(1)VDMLDGVTVVR	3	-0.21185	1
A0A1S4CQ40	306	K	Fructose-bisphosphate aldolase	3	LOC107821177	1	0.0037698	83.53	ALQQSTLK(1)AWAGK	3	0.0048139	4	1	0.00219799	95.273	ALQQSTLK(1)AWAGK	3	0.30777	4	1	0.00019247	118.76	ALQQSTLK(1)AWAGK	2	0.35986	3
A0A1S3XZK3	127	K	membrane steroid-binding protein 2-like	3	LOC107770471	1	0.00214311	112.85	ALAK(1)MSFEEK	2	0.70369	4	1	0.0137509	91.549	ALAK(1)MSFEEK	2	0.050395	3	1	0.0165419	80.24	ALAK(1)MSFEEK	3	0.29294	2
A0A1S4DPE9	88	K	pto-interacting protein 1-like	3	LOC107832028	1	0.00225179	92.239	VYHGVLK(1)SGR	3	1.6928	1	1	0.00146527	106.88	VYHGVLK(1)SGR	3	0.1254	1	1	0.00384872	79.489	VYHGVLK(1)SGR	3	-0.10386	1
A0A1S4AP74	149	K	V-type proton ATPase subunit a	3	LOC107799704	1	0.00269275	86.114	K(1)AQSSAEAQLR	3	2.0586	2	1	0.00367943	85.522	K(1)AQSSAEAQLR	3	1.2452	2	1	0.00144812	109.72	K(1)AQSSAEAQLR	3	2.668	2
A0A1S4CQE1	96	K	actin-depolymerizing factor 2-like	3	LOC107821365	1	1.00688e-05	125.82	IFFIAWSPDTSK(1)VR	3	0.35304	1	1	1.96003e-06	122.46	IFFIAWSPDTSK(1)VR	3	0.32689	1	1	3.66612e-09	135.94	IFFIAWSPDTSK(1)VR	3	0.69573	2
A0A1S4CNE1	1608	K	phosphatidylinositol 4-kinase alpha 1	3	LOC107820741	1	0.00104553	128.6	IIDGFNEK(1)AR	2	-1.7883	2	1	0.000212981	121.73	IIDGFNEK(1)AR	2	-1.6771	2	1	0.000961035	98.048	IIDGFNEK(1)AR	3	0.90518	1
A0A1S4CIT2	161	K	elongation factor 1-delta 1-like isoform X2	1	LOC107819488								0.999998	0.0021556	79.317	SSVLLDVKPWDDETDMK(1)K	3	2.2283	1
A0A1S4ARC4	145	K	Serine hydroxymethyltransferase	1	LOC107800464								1	0.00698862	63.706	IMGLDLPSGGHLTHGYYTSGGK(1)K	4	0.59642	1
A0A1S3XXR3	489	K	mechanosensitive ion channel protein 10-like isoform X2	3	LOC107770000	1	0.00198148	66.289	YLEK(1)TPQYWHPNHSVVVK	3	-0.45739	3	1	0.0171068	47.223	YLEK(1)TPQYWHPNHSVVVK	4	0.39408	1	1	0.0136053	50.831	YLEK(1)TPQYWHPNHSVVVK	5	0.96388	3
A0A1S4ARV7	198	K	26S protease regulatory subunit 6A homolog	1	LOC107800555															1	0.0273511	70.552	FQK(1)LGVRPPK	3	0.40166	2
A0A1S3XH22	77	K	probable peroxygenase 4 isoform X2	3	LOC107765104	1	0.00449691	78.488	FVPEK(1)FEELFK	3	-0.39589	1	1	0.00409166	81.017	FVPEK(1)FEELFK	3	-0.21837	1	1	0.00690094	69.672	FVPEK(1)FEELFK	3	-0.29809	1
A0A1S3X2B6	25	K	small EDRK-rich factor 2-like	1	LOC107760491								1	0.0218423	79.492	GK(1)DDGLTPEQR	2	-0.68914	1
A0A1S4AAI5	190	K	V-type proton ATPase subunit a	1	LOC107795468								1	0.0116932	69.846	QVK(1)LGFITGLVPR	3	-0.64875	1
A0A1S4B914	407	K	CBS domain-containing protein CBSCBSPB3-like isoform X2	1	LOC107805816								1	0.0350091	75.738	SVGLK(1)ALR	2	-0.09348	1
A0A1S4C9D4	651	K	ubiquitin-activating enzyme E1 1-like	3	LOC107816375	1	0.00291909	54.521	DPPEK(1)QAPMCTVHSFPHNIDHCLTWAR	5	0.0084221	1	1	3.84671e-34	133.68	DPPEK(1)QAPMCTVHSFPHNIDHCLTWAR	4	0.1942	5	1	6.20642e-32	125.35	DPPEK(1)QAPMCTVHSFPHNIDHCLTWAR	5	-0.049549	5
A0A1S3XEA8	167	K	uncharacterized protein LOC107764191	1	LOC107764191								1	0.0299783	48.277	VTFAK(1)MK(1)LTALAK	3	2.7633	1
A0A1S4DA65	11	K	ubiquitin-NEDD8-like protein RUB2	1	LOC107827608															1	3.1997e-149	293.08	TLTGK(1)TITLEVESSDTIDNVK	2	0.26558	6
A0A1S4D864	154	K	SNW/SKI-interacting protein-like	1	LOC107827086								0.989853	0.0324827	40.475	SK(0.011)VQK(0.99)EMIMK(1)EK	2	-0.51388	1
A0A1S4DMY4	251	K	"threonine--tRNA ligase, mitochondrial 1-like"	1	LOC107831509	0.953362	0.0269932	70.373	FK(0.047)VEIIK(0.953)DLPEDK	3	-0.67982	1
A0A1S3ZXI9	505	K	protein QUIRKY-like	1	LOC107791490								1	0.0262714	54.486	VAPGK(1)DEIIGR	3	-0.033279	1
A0A1S4AI31	198	K	uncharacterized protein LOC107797953	2	LOC107797953	1	0.00441656	110.61	K(1)QLEK(1)LR	3	0.13192	1								1	0.00937104	118.69	K(1)QLEK(1)LR	3	0.05735	1
A0A1S4CQ23	205	K	T-complex protein 1 subunit gamma	1	LOC107821431															1	0.02438	55.261	IILLDSPLEYK(1)K	3	-0.080523	1
A0A1S4DFW8	25	K	probable NAD(P)H dehydrogenase (Quinone) FQR1-like 1	2	LOC107829401								1	0.00608025	73.082	K(1)GAASVEGVEAK	2	-0.5735	2	1	0.00988918	70.089	K(1)GAASVEGVEAK	3	0.75738	1
A0A1S4BYQ0	128	K	Glyceraldehyde-3-phosphate dehydrogenase	1	LOC107813294								1	0.00392777	64.705	VIISAPSK(1)DAPMFVVGVNEK	3	-0.13127	1
A0A1S4A3R7	50	K	remorin-like	1	LOC107793398															1	0.0348198	68.383	ALVPVEK(1)R	2	0.55158	1
A0A1S3ZVF1	127	K	sulfoquinovosyl transferase SQD2-like	1	LOC107790882								1	0.0213532	58.433	FQNFIK(1)YLR	3	-0.54408	1
A0A1S3Z8U8	135	K	Fructose-bisphosphate aldolase	3	LOC107784214	1	0.00524532	101.65	CAQYYK(1)AGAR	3	0.086797	2	1	0.0155957	90.15	CAQYYK(1)AGAR	2	1.104	1	1	0.0189981	56.632	CAQYYK(1)AGAR	3	0.36191	1
L0SS91	227	K	Catalase	1	cat1								1	0.00737962	72.848	FHWK(1)PTCGVK	3	-0.22116	3
O24154	263	K	Methyltransferase	3	LOC107764502	1	0.0210312	57.347	SYK(1)DIAEVAK	3	-0.781	1	1	0.00505502	79.07	SYK(1)DIAEVAK	3	0.12014	1	1	0.00215787	89.827	SYK(1)DIAEVAK	3	0.35775	1
A0A1S4DHK7	47	K	9-divinyl ether synthase-like	1	LOC107829877	1	0.0320569	68.786	MK(1)NYQSTVFR	2	-2.3529	2
A0A1S3ZKH4	205	K	transmembrane emp24 domain-containing protein p24beta2-like isoform X1	1	LOC107787713															1	0.00672043	80.916	NLFERK(1)LGQSR	2	-2.1684	1
A0A1S4AP74	55	K	V-type proton ATPase subunit a	1	LOC107799704															1	0.00673347	105.13	DLNAEK(1)SPFQR	2	1.0793	2
A0A1S3X9T4	155	K	probable disease resistance protein RF9	1	LOC107762797	0.99974	0.00891013	90.906	KNMEHK(1)VSR	2	-3.7832	1
A0A1S4C0C1	143	K	ubiquitin-40S ribosomal protein S27a-like	3	LOC107813709	1	0.0252538	50.222	HYCGK(1)CGLTYVYQK	3	-0.5821	1	1	0.0256347	48.277	HYCGK(1)CGLTYVYQK	3	-0.31014	1	1	0.0202184	52.891	HYCGK(1)CGLTYVYQK	3	-0.59121	1
A0A1S3XPI1	124	K	ubiquitin-NEDD8-like protein RUB2	1	LOC107767149	1	0.000313397	142.76	LIYAGK(1)QLADDK	2	0.33722	5
A0A1S4B881	221	K	luminal-binding protein	1	LOC107805460	1	0.0223012	53.037	IINEPTAAAIAYGLDK(1)K(1)GGEK	3	1.1959	1
A0A1S4DJN1	156	K	MADS-box protein SVP-like isoform X2	1	LOC107830515	0.87373	0.00273123	78.964	K(0.874)K(0.126)EAQLQEENSQLK	3	-1.6467	1
P45733	628	K	Phenylalanine ammonia-lyase	1																1	0.000752773	100.88	AVLPK(1)EVESAR	3	0.35965	2
A0A1S4D383	781	K	calmodulin-binding transcription activator 4-like isoform X3	1	LOC107825443								1	0.0342679	44.511	CRK(1)DFLAFRQK(1)VVK	3	-1.5302	1
A0A1S4D817	80	K	acyl-CoA-binding protein-like	2	LOC107826954								0.999995	0.00293527	113.38	VK(1)QLKEEAASA	2	-0.58035	1	0.999237	0.021079	75.788	VK(0.999)QLK(0.001)EEAASA	2	-0.58626	1
A0A1S4B2F2	374	K	BAHD acyltransferase DCR	1	LOC107803843								1	0.00131539	66.201	IFQYK(1)DAGVNCVAVGSSPR	3	3.5964	1
A0A1S3YAA7	36	K	NEDD8-conjugating enzyme Ubc12	2	LOC107774225	1	0.010489	64.224	LHK(1)DISELNLPK	3	-0.20354	1								1	0.023833	52.79	LHK(1)DISELNLPK	3	0.016665	1
Q5KTN5	101	K	14-3-3 c-1 protein	1	14-3-3															0.99992	0.0193802	62.658	SKIENELSK(1)ICDGILK	3	-0.63822	1
P41919	162	K	GTP-binding nuclear protein Ran-B1	1	RAN-B1															1	0.0160095	62.081	SNYNFEK(1)PFLYLAR	3	1.4143	1
A0A1S4DM02	12	K	UDP-glucuronate 4-epimerase 6-like	1	LOC107831214															1	0.0349887	42.682	ASPPDTSK(1)TTK(1)LER	3	0.90329	1
A0A1S3Y877	32	K	MLO-like protein 10	1	LOC107773399								0.796856	0.0297688	47.429	K(0.827)K(0.173)AGAK(0.797)GDK(0.203)STR	3	3.2618	1
A0A1S3X1P6	46	K	abscisic acid receptor PYL9-like	1	LOC107760324															0.953763	0.00553628	73.802	RFDQPQK(0.954)YK(0.046)PFVSR	4	0.49974	1
A0A1S4B900	163	K	"peroxiredoxin Q, chloroplastic-like"	1	LOC107805800	1	3.83761e-06	156.08	LPFTLLCDEGNK(1)VR	3	-0.29542	2
A9CM22	236	K	Voltage-dependent anion channel	3	NtVDAC3	1	1.96703e-07	119.47	VNNFGK(1)ASALLQHEWRPK	3	0.36132	1	1	5.8105e-06	101.04	VNNFGK(1)ASALLQHEWRPK	3	-0.088956	2	1	1.15964e-09	119.04	VNNFGK(1)ASALLQHEWRPK	3	-0.55632	3
A0A1S4B881	539	K	luminal-binding protein	1	LOC107805460	1	4.84309e-07	185.6	ITITNDK(1)GR	3	-0.19288	5
A0A1S4ADW0	354	K	Plasma membrane ATPase	3	LOC107796542	1	0.0108973	81.565	NLVEVFAK(1)GVDK	3	0.11308	2	1	0.0204694	76.357	NLVEVFAK(1)GVDK	2	0.80444	1	1	0.0232086	91.202	NLVEVFAK(1)GVDK	2	1.3412	1
O82702	73	K	V-type proton ATPase subunit G 1	3	VATG1	1	7.26978e-12	180.56	KLEQTSGDSGANVK(1)R	2	0.70764	2	1	1.65586e-06	122.16	KLEQTSGDSGANVK(1)R	2	0.099692	3	1	1.2043e-10	155.37	KLEQTSGDSGANVK(1)R	2	1.5116	2
A0A140G1Q7	7	K	Photosystem II D2 protein	1	psbD															1	0.0151897	64.82	TIALGK(1)FTK	2	-0.60588	1
A0A1S4AGN4	315	K	"GDP-mannose 3,5-epimerase 1-like"	1	LOC107797479								1	0.00693992	73.9	EK(1)LGWAPTMR	3	-0.79395	1
A0A1S3ZH93	9	K	uncharacterized protein LOC107786812	1	LOC107786812								1	0.0202516	60.019	MSAIVCGSK(1)R	3	1.7138	1
A0A1S4BXK5	452	K	Glycosyltransferase	1	LOC107812963															1	0.00543705	71.614	IEEMK(1)EK(1)SRR	2	-1.5381	1
A0A1S4CU29	124	K	nicotinate phosphoribosyltransferase 2-like	2	LOC107822466	1	0.0064428	85.554	AIEK(1)EFGLPGFGK	2	-1.4758	1	1	0.0287152	50.467	AIEK(1)EFGLPGFGK	2	-0.69363	2
C6ZIA5	667	K	Phenylalanine ammonia-lyase	2	pal4	1	0.0248413	53.947	K(1)ELGTELLTGER	3	-0.5133	1	1	0.0219083	58.595	K(1)ELGTELLTGER	3	-0.5023	1
A0A1S3Z9R5	181	K	telomere repeat-binding factor 1-like isoform X2	1	LOC107784527	0.972922	0.0200768	61.679	LIK(0.028)MK(0.973)RK(0.999)YK	2	2.342	1
A0A1S3XPI1	48	K	ubiquitin-NEDD8-like protein RUB2	1	LOC107767149	1	7.16755e-41	223.87	LIFAGK(1)QLEDGR	2	-0.85725	250
A0A140G1U3	321	K	Photosystem II CP47 reaction center protein	1	psbB															1	6.5528e-07	99.238	LAFYDYIGNNPAK(1)GGLFR	3	2.7493	1
A0A1S3XHP2	229	K	uncharacterized protein LOC107765259 isoform X2	2	LOC107765259								1	0.00297971	68.168	STAYDPENQTK(1)ACEK	3	0.36581	1	1	0.00116656	77.24	STAYDPENQTK(1)ACEK	3	0.41449	1
A0A1S4DNJ5	467	K	calcium-dependent protein kinase 3-like	2	LOC107831716								1	0.00149409	126.24	K(1)YNISDEK	2	-0.4963	2	1	0.00130966	133.13	K(1)YNISDEK	2	-0.18045	1
A0A1S4DID0	164	K	DNA ligase 1-like isoform X2	1	LOC107830190	0.981709	0.0264584	53.395	NEK(0.993)GRISK(0.982)NAK(0.025)SNGDSTR	2	2.8912	1
A0A1S3XRI1	35	K	NADP-dependent D-sorbitol-6-phosphate dehydrogenase-like	3	LOC107767965	1	0.0157734	85.813	DLIINAIK(1)IGYR	2	-0.044242	2	1	0.0037712	92.611	DLIINAIK(1)IGYR	2	0.544	2	1	0.0037321	83.045	DLIINAIK(1)IGYR	2	-0.3794	2
A0A1S4AWJ2	161	K	vesicle-associated membrane protein 714-like	1	LOC107802062	1	0.000236323	83.894	IELLVDK(1)TATMQDSAFHFR	4	-1.182	1
A0A1S3XNP1	27	K	polyubiquitin 11-like	3	LOC107766892	1	9.82472e-13	141.31	TITLEVESSDTIDNVK(1)AK	2	0.22736	4	1	1.26358e-51	174.4	TITLEVESSDTIDNVK(1)AK	2	0.14024	5	1	2.59039e-14	166.21	TITLEVESSDTIDNVK(1)AK	2	-0.34788	5
A0A1S4DQL3	9	K	aquaporin PIP1-1-like	3	LOC107832383	0.998999	0.00564666	62.287	MEGK(0.001)EEDVK(0.999)VGANK	3	0.84255	1	0.99513	0.00138639	73.758	MEGK(0.005)EEDVK(0.995)VGANK	3	0.8191	2	0.999233	0.0170238	70.54	MEGK(0.001)EEDVK(0.999)VGANK	3	-0.53917	2
P93373	222	K	Actin-54 (Fragment)	3		1	0.00157359	60.8	SSSSIEK(1)NYELPDGQVITIGAER	3	-0.14639	1	1	3.32917e-13	109.23	SSSSIEK(1)NYELPDGQVITIGAER	3	-0.25755	1	1	4.8107e-08	89.631	SSSSIEK(1)NYELPDGQVITIGAER	3	-0.38235	1
A0A1S3ZEB8	468	K	inactive leucine-rich repeat receptor-like serine/threonine-protein kinase At1g60630	3	LOC107785829	1	0.0295633	47.506	ANSGSK(1)PLHWTSCLK	3	-0.5192	1	1	0.0260185	46.41	ANSGSK(1)PLHWTSCLK	3	-1.6359	1	1	0.0340326	60.901	ANSGSK(1)PLHWTSCLK	3	0.046985	1
P69040	11	K	Eukaryotic translation initiation factor 5A-1	3	EIF-5A1	1	3.54904e-18	113.23	SDEEHHFESK(1)ADAGASK(1)TYPQQAGTIR	4	0.61083	3	1	0.0271921	41.257	SDEEHHFESK(1)ADAGASK	3	-0.61174	1	1	0.00065157	76.051	SDEEHHFESK(1)ADAGASK(1)TYPQQAGTIR	4	1.5018	3
A0A1S4CLR3	3	K	uncharacterized protein LOC107820317	1	LOC107820317								1	0.0252371	41.383	MVK(1)EFFNGNDLPR	2	3.8683	1
Q9XG77	45	K	Proteasome subunit alpha type-6	1	PAA1	1	0.0267025	69.864	GK(1)DSVCVVTQK	2	0.29318	1
A0A1S4CM37	69	K	uncharacterized protein LOC107820507	1	LOC107820507								0.74758	0.0233144	51.528	SMDK(0.748)K(0.748)K(0.505)SVGK	2	-0.063106	1
A0A1S4ASP2	31	K	Peptidyl-prolyl cis-trans isomerase	3	LOC107801011	1	4.71564e-11	133.28	VVMELYADTVPK(1)TAENFR	2	0.039928	8	1	4.3265e-28	137.45	VVMELYADTVPK(1)TAENFR	2	-0.86949	4	1	3.88079e-10	152.37	VVMELYADTVPK(1)TAENFR	2	-0.77383	6
A0A140G1S3	164	K	Ribulose bisphosphate carboxylase large chain	3	rbcL	1	0.0308213	96.492	DKLNK(1)YGR	2	-0.68633	1	1	0.0261195	98.629	DKLNK(1)YGR	2	0.78951	2	1	0.0129171	107.29	DKLNK(1)YGR	2	-0.34814	2
O24154	45	K	Methyltransferase	2	LOC107764502								1	0.0091753	63.46	AVQLSGGSIEK(1)ENVQDNYK	3	0.14223	1	1	1.59728e-11	114.58	AVQLSGGSIEK(1)ENVQDNYK	3	-0.035327	1
A0A1S4BAR2	406	K	"betaine aldehyde dehydrogenase, chloroplastic-like"	1	LOC107806351								1	0.00250911	67.299	TFK(1)TEEEAIELANDTK	3	0.66251	1
A0A1S4DBN1	289	K	uncharacterized protein LOC107828021	1	LOC107828021	1	0.0305667	57.047	GVSNFLK(1)K	2	-1.0175	1
A0A1S4B9J1	589	K	leucine-rich repeat receptor-like protein kinase PXC1	1	LOC107805879	1	0.0334757	45.54	VEEEEMAVDLPK(1)WVR	3	-1.2594	1
A0A1S4DMR7	173	K	Peptidylprolyl isomerase	2	LOC107831220	1	0.0062033	104.06	IQAK(1)LEAK	2	-0.0029141	1	1	0.0146772	115.49	IQAK(1)LEAK	2	-4.1253	1
Q14TB1	263	K	Heat shock protein 90	3	hsp90	0.986636	2.08029e-06	105.14	EVSNEWSLVNK(0.987)QK(0.013)PIWMR	3	1.2193	3	0.885646	1.17121e-19	121.13	EVSNEWSLVNK(0.886)QK(0.114)PIWMR	3	2.6053	2	0.932243	0.000516835	84.41	EVSNEWSLVNK(0.932)QK(0.068)PIWMR	4	-0.15579	2
A0A1S4B2J7	506	K	heat shock cognate 70 kDa protein 2	1	LOC107803885								1	0.00519218	106.2	NK(1)ITITNDK(1)GR	3	-0.19935	3
A0A1S3X6C1	389	K	probable serine/threonine-protein kinase At4g35230 isoform X2	3	LOC107761663	1	6.84959e-06	169.4	DKDFK(1)SAVDYYSK	2	0.19044	3	0.999995	1.90519e-42	174.24	DKDFK(1)SAVDYYSK	2	0.11933	4	0.999999	6.05913e-06	154.69	DKDFK(1)SAVDYYSK	2	0.50899	3
A0A1S4B5L4	262	K	"alpha-1,4-glucan-protein synthase [UDP-forming] 1-like"	1	LOC107804720								1	0.0236145	43.37	TGLPYLWHSK(1)ASNPFVNLK	4	0.61651	1
A0A1S3ZVF1	482	K	sulfoquinovosyl transferase SQD2-like	2	LOC107790882	1	0.00321202	76.357	NEQYSAAIWFWK(1)K	3	0.018325	1	1	0.0180855	57.434	NEQYSAAIWFWK(1)K	3	-0.17646	1
A0A1S4C852	331	K	S-adenosylmethionine synthase	1	LOC107816144															1	2.67805e-05	110.25	TGTIPDK(1)DILALIK	3	-0.10497	2
A0A1S4ANK2	372	K	uncharacterized protein LOC107799438	1	LOC107799438								1	0.026741	57.288	LQEYVK(1)SEYDHSCLR	3	-1.5264	1
A0A1S3YCS2	56	K	"alpha-1,4-glucan-protein synthase [UDP-forming] 2-like"	3	LOC107774692	1	4.15878e-05	104.9	VIK(1)VPEGFDYELYNR	3	0.29481	3	1	4.65015e-18	147.39	VIK(1)VPEGFDYELYNR	3	0.18659	2	1	0.000519474	89.506	VIK(1)VPEGFDYELYNR	3	-0.52198	3
A0A1S4DHK7	391	K	9-divinyl ether synthase-like	1	LOC107829877								1	0.0271844	73.273	VFK(1)NPEEFNADR	2	1.0168	1
A0A1S3Y0S5	338	K	uncharacterized protein LOC107770899	3	LOC107770899	1	5.59171e-10	149.22	AVVACEGDLEK(1)AEETLR	2	-1.9581	2	1	9.38288e-28	156.49	AVVACEGDLEK(1)AEETLR	3	-1.1701	1	1	0.000542051	79.393	AVVACEGDLEK(1)AEETLR	3	-0.67985	1
A0A1S4D0S8	132	K	remorin-like	2	LOC107824746	1	0.00268914	167.93	K(1)ANLEAELK	2	0.32238	4	1	0.00671646	107.06	K(1)ANLEAELK	2	-0.037876	2
A0A1S4AG39	506	K	phototropin-1-like	3	LOC107797310	1	0.00603451	74.698	IEK(1)NFVITDPR	3	-0.12474	1	1	0.000955591	106.79	IEK(1)NFVITDPR	3	-0.98179	2	1	0.00172419	92.112	IEK(1)NFVITDPR	3	-0.54274	1
A0A1S3ZTZ2	14	K	protein SIEVE ELEMENT OCCLUSION B-like	3	LOC107790470	1	2.09696e-06	104.7	ALVPAAHHGK(1)PAQPMAR	3	1.1768	3	1	0.00321212	63.29	ALVPAAHHGK(1)PAQPMAR	4	0.94476	2	1	0.000264949	83.869	ALVPAAHHGK(1)PAQPMAR	4	0.83816	3
A0A1S4ATD2	651	K	uncharacterized protein LOC107801072	1	LOC107801072															1	0.0270116	53.775	K(1)PLFTSSR	3	0.5328	1
A0A1S4ASP2	44	K	Peptidyl-prolyl cis-trans isomerase	3	LOC107801011	1	0.00113261	123.11	ALCTGEK(1)GVGR	2	0.14154	3	1	1.55199e-12	141.91	ALCTGEK(1)GVGR	3	0.31302	3	1	0.000374796	178.84	ALCTGEK(1)GVGR	2	-0.19815	2
A0A1S3ZGP0	318	K	calcium-dependent protein kinase 11-like	1	LOC107786544	1	0.0299471	46.892	QFCDMNK(1)LK(1)K(1)MALRVIAER	3	2.8236	1
A0A1S4DNV9	236	K	mitochondrial outer membrane protein porin 2-like	2	LOC107831810	1	0.0203524	46.543	LNNHGK(1)LGALLQHELIPK	4	-0.69689	1	1	0.0137848	49.621	LNNHGK(1)LGALLQHELIPK	4	-0.22596	2
A0A1S3XNM8	320	K	PHD finger protein MALE MEIOCYTE DEATH 1-like	1	LOC107767068								1	0.0240355	55.335	NAAPNK(1)SEGK(1)EK(1)SVR	2	3.1355	1
A0A1S4DII6	102	K	ras-related protein RABH1b	1	LOC107830228	1	0.00743392	63.682	QSFLNTSK(1)WIEEVR	3	0.62944	1
A0A1S3Y3U0	139	K	Histone H2A	1	LOC107771868								1	0.0288356	78.264	SLINK(1)TTK(1)E	3	0.32151	1
A0A1S3XPG2	123	K	Superoxide dismutase	1	LOC107767307															1	0.00468118	54.668	AAAATQFGSGWAWLAYK(1)PEEK	3	-0.09969	1
A0A1S4BJ94	25	K	probable NAD(P)H dehydrogenase (Quinone) FQR1-like 1	1	LOC107808878	1	0.00266558	90.759	K(1)GAASVEGVEAK	2	0.91668	1
A0A1S4DII6	160	K	ras-related protein RABH1b	2	LOC107830228	1	0.00246884	89.886	AGFNIK(1)PLFR	3	-0.22581	3	1	0.00748017	72.607	AGFNIK(1)PLFR	3	0.47727	2
A0A1S3XTB8	563	K	heat shock cognate 70 kDa protein 2-like	3	LOC107768506	0.999996	0.000949229	160.86	NTIKDEK(1)IGSK	3	-0.35358	2	1	6.96178e-57	193	NTIK(1)DEK(1)IGSK	3	0.78933	3	0.996336	0.0015865	116.98	NTIK(0.004)DEK(0.996)IGSK	3	-0.63554	2
A0A1S3ZAN8	154	K	Werner Syndrome-like exonuclease	1	LOC107784650	1	0.018057	50.108	RMAK(1)AVVGK(1)VMEK(1)PK	4	-1.878	1
A0A1S3WZ70	155	K	protein SUPPRESSOR OF K(+) TRANSPORT GROWTH DEFECT 1-like isoform X2	3	LOC107759416	1	0.0090722	71.614	FPQFFTGK(1)R	3	-0.37135	3	1	0.0156339	90.15	FPQFFTGK(1)R	2	-0.34093	3	1	0.0128789	89.029	FPQFFTGK(1)R	3	0.4438	2
A0A1S4DME7	13	K	ATP-dependent DNA helicase 2 subunit KU80 isoform X2	1	LOC107831338								0.999844	0.0187485	79.489	KFGQTNK(1)GK	2	-3.54	1
A0A1S3Z9L4	353	K	Non-specific serine/threonine protein kinase	1	LOC107784517								1	0.0344278	44.925	TIISK(1)LEDVAK(1)RLK(1)LK	3	-2.5088	1
A0A1S4AV41	45	K	uncharacterized protein LOC107801692	1	LOC107801692	1	0.0334003	42.336	TTIGMNMLK(1)K(1)R	3	1.7593	1
A0A0A7AF85	388	K	Carotenoid cleavage dioxygenase 1-1	3	CCD1-1	1	0.0247489	71.153	FNMK(1)TGLASQK	2	-0.71804	1	1	0.0106659	90.697	FNMK(1)TGLASQK	2	-0.67285	1	1	0.0040967	117.25	FNMK(1)TGLASQK	2	0.64719	2
A0A1S4AYR2	118	K	aldehyde dehydrogenase family 3 member H1-like	1	LOC107802760	1	0.0190387	63.419	FYGK(1)DPLK	3	-0.36421	1
A0A1S3ZHQ7	167	K	Proteasome subunit alpha type	1	LOC107786909								1	0.0284542	66.962	YFGAAIGK(1)GR	2	0.70948	1
A0A1S3XU57	125	K	Carbonic anhydrase	3	LOC107768773	1	0.0331158	47.971	AGFIHFK(1)TEK	3	0.055432	1	1	0.00458399	82.831	AGFIHFK(1)TEK	3	0.053866	2	1	0.0219089	54.539	AGFIHFK(1)TEK	3	0.31207	1
A0A1S4BHG0	140	K	uncharacterized protein LOC107808316	1	LOC107808316								0.853063	0.0328031	60.972	NQK(0.853)K(0.15)QNK(0.996)K	2	-0.97883	1
A0A1S3XL61	179	K	uncharacterized protein LOC107766394	1	LOC107766394															0.965326	0.0353038	51.03	TLADLLK(0.038)K(0.965)VGASYDPK(0.997)K	4	-0.41609	1
A0A1S4BST6	109	K	vesicle-associated membrane protein 722-like	3	LOC107811510	1	0.000524536	84.62	AATAPPNSLNK(1)EFGPK	3	1.2766	1	1	2.62507e-07	108.36	AATAPPNSLNK(1)EFGPK	3	0.58005	1	1	0.00345031	78.508	AATAPPNSLNK(1)EFGPK	3	0.33757	1
A0A1S4CS69	7	K	DNA-directed RNA polymerases IV and V subunit 4-like	1	LOC107822131															1	0.0158824	57.567	AEK(1)GGK(1)GFSLPK	3	0.20414	2
A0A1S4ALM3	113	K	ubiquitin-40S ribosomal protein S27a-like	2	LOC107799069	1	0.0027363	130.75	VDDSGK(1)VQR	3	0.032585	2								1	0.00803357	123.21	VDDSGK(1)VQR	3	-0.1638	2
Q9XEN8	170	K	Annexin	3	Anx3	1	0.00649641	77.533	K(1)EANILHEK	3	2.0663	1	1	0.00735371	98.754	K(1)EANILHEK	2	1.0603	2	1	0.0179179	65.278	K(1)EANILHEK	3	0.25216	2
A0A1S3YEC7	322	K	Pyrophosphate--fructose 6-phosphate 1-phosphotransferase subunit beta	2	LOC107775390	1	0.0041271	71.558	NVTDYIADVICK(1)R	3	0.0096318	1	1	0.00454098	71.976	NVTDYIADVICK(1)R	3	0.43293	2
A0A1S4D0S8	63	K	remorin-like	3	LOC107824746	1	4.27232e-05	126.32	SDDSK(1)ALVVVEDK	3	0.20134	4	1	1.68226e-05	121.92	SDDSK(1)ALVVVEDK	2	-3.8998	4	1	0.00269228	81.656	EK(1)SDDSK(1)ALVVVEDK	3	1.432	2
A0A1S4B9I9	91	K	RNA-directed DNA polymerase homolog	1	LOC107805915															0.999233	0.0340718	42.257	DVPFK(0.999)FDDACLK(0.001)AFEELK	4	1.085	1
A0A1S4B6T0	122	K	elongation factor 2-like	2	LOC107805110								1	4.32777e-05	98.676	NATLTNEK(1)EVEAHPIR	4	-0.2329	2	1	1.49178e-06	106.42	NATLTNEK(1)EVEAHPIR	4	-1.32	2
A0A1S4ASP2	147	K	Peptidyl-prolyl cis-trans isomerase	3	LOC107801011	1	6.03891e-06	106.3	HVVFGQVVEGYDVIK(1)K	3	0.65258	1	1	2.37609e-06	112.03	HVVFGQVVEGYDVIK(1)K	3	0.020248	2	1	4.31796e-12	136.81	HVVFGQVVEGYDVIK(1)K(1)AEAVGSGSGR	4	0.10851	4
A0A1S3YL49	2032	K	protein CHROMATIN REMODELING 4	1	LOC107777459															1	0.0300013	71.888	FDLK(1)K(1)ENDIGASR	2	-0.02356	1
A0A1S3YL98	49	K	glutathione S-transferase DHAR2-like	1	LOC107777254								0.734401	0.00567269	53.033	MHLINVSDK(0.266)PK(0.734)WFLEVNPEGK	4	0.93223	2
A0A1S3Y263	63	K	polyadenylate-binding protein 4-like	1	LOC107771383	1	0.00137726	128.85	FEQTAK(1)EAVDK	2	-0.084675	1
Q68GS0	61	K	SKP1	1	SKP1	1	0.0149005	70.912	VIEYCK(1)R	2	-0.94637	1
C6ZIA5	633	K	Phenylalanine ammonia-lyase	2	pal4	1	0.00363442	83.081	AVLPK(1)EVESAR	3	0.34024	2	1	0.00227945	90.05	AVLPK(1)EVESAR	2	0.7881	3
A0A1S4D9A2	241	K	elongation factor 1-gamma 2-like isoform X1	1	LOC107827359															0.785885	4.78408e-11	143.93	K(0.786)EEPK(0.214)FEEEEEAPKPK	4	0.27308	1
A0A1S4CIX2	7	K	dihydrofolate reductase-like isoform X2	1	LOC107819360								0.500141	0.030509	51.436	MENK(1)LEK(0.5)K(0.5)PR	2	-0.33352	1
A0A1S3Y2Z3	11	K	uncharacterized protein LOC107771669 isoform X2	1	LOC107771669								0.999966	0.0225211	82.279	SMK(1)REEKR	2	3.968	1
A0A1S3XHL0	30	K	40S ribosomal protein S20-2	3	LOC107765328	1	0.00938553	77.204	ITLSSK(1)NVK(1)NLEK	3	-0.49856	1	1	0.0068655	88.224	ITLSSK(1)NVK(1)NLEK	3	1.0415	1	1	0.0230908	61.167	ITLSSK(1)NVK(1)NLEK	3	0.7315	1
P69040	18	K	Eukaryotic translation initiation factor 5A-1	3	EIF-5A1	1	3.54904e-18	118.5	SDEEHHFESK(1)ADAGASK(1)TYPQQAGTIR	4	0.61083	4	1	1.09491e-06	112.91	ADAGASK(1)TYPQQAGTIR	2	1.1326	3	1	3.36781e-06	98.552	SDEEHHFESK(1)ADAGASK(1)TYPQQAGTIR	4	1.5018	4
A0A1S4DK98	171	K	formate--tetrahydrofolate ligase-like isoform X2	2	LOC107830687								1	0.00249501	68.283	IFHESSQSDK(1)ALFNR	3	-0.26231	2	1	0.000993882	79.337	IFHESSQSDK(1)ALFNR	3	-0.11861	1
A0A1S4ADW0	914	K	Plasma membrane ATPase	3	LOC107796542	1	0.0024065	150.15	ELSEIAEQAK(1)R	2	2.2197	2	1	7.70412e-09	133.91	ELSEIAEQAK(1)R	2	2.2462	1	1	0.00216399	161.67	ELSEIAEQAK(1)R	2	1.7643	1
A0A1S3Z8N6	232	K	ubiquitin carboxyl-terminal hydrolase 14-like	3	LOC107784029	1	0.000175747	107.11	K(1)DYILSLNIPLEK	2	0.19568	2	1	1.30207e-11	140.31	K(1)DYILSLNIPLEK	3	-2.0486	1	1	0.00064627	102.15	K(1)DYILSLNIPLEK	3	-0.72011	1
A0A1S4AIH0	72	K	jasmonic acid-amido synthetase JAR1-like	1	LOC107798060															1	0.0222089	50.534	TK(1)GGLAAGTATTNVYR	3	-0.30256	1
A0A1S4DKL9	39	K	Pyruvate kinase	1	LOC107830802								1	0.0141139	63.694	IVGTLGPK(1)SR	3	-1.3987	1
A0A1S4DG44	209	K	uncharacterized protein LOC107829270	1	LOC107829270								1	0.029551	45.908	PRK(1)GK(1)LCSK(1)TR	3	3.452	1
A0A1S4DGM0	345	K	Fructose-bisphosphate aldolase	3	LOC107829473	1	1.51471e-07	80.102	ALQNTCLK(1)TWGGRPENVQAAQEALLVR	4	-0.021295	2	1	5.94559e-07	82.885	ALQNTCLK(1)TWGGRPENVQAAQEALLVR	4	0.35511	2	1	8.94868e-12	95.926	ALQNTCLK(1)TWGGRPENVQAAQEALLVR	4	-0.23395	3
A0A1S3YNL2	19	K	"putative methylesterase 11, chloroplastic"	1	LOC107778030															0.930317	0.0340858	40.645	GNSLACFSEK(0.285)NQATK(0.785)VRK(0.93)SNK	3	2.0091	1
Q948K3	72	K	14-3-3 protein	2	D75								1	1.1706e-111	221.55	ILSSIEQK(1)EESR	2	0.36362	8	1	3.44536e-15	216.91	ILSSIEQK(1)EESR	3	-0.15623	9
A0A1S4BPM0	202	K	transcription factor bHLH84-like	1	LOC107810548	0.999998	0.0299299	64.207	NK(1)RSVKPK	3	-0.057597	1
A0A1S4CVW8	382	K	Transmembrane 9 superfamily member	1	LOC107823168	1	0.0206768	73.841	NSK(1)AEFQAPCR	2	3.2077	1
A0A1S3X5I0	28	K	Carbonic anhydrase	2	LOC107761423	1	2.6568e-100	263.07	K(1)LLSEK(1)NELEDAAVAK	3	-0.14564	4	1	2.0247e-172	246.69	K(1)LLSEK(1)NELEDAAVAK	3	-0.042909	6
A0A1S4DDI9	304	K	mRNA-binding protein PUF3-like	1	LOC107828664								0.996559	0.0301675	54.094	NEIK(0.039)MERLQEK(0.964)K(0.997)PAR	2	-3.2089	1
A0A1S3ZCY7	141	K	"asparagine--tRNA ligase, cytoplasmic 1-like"	1	LOC107785502															1	0.00263897	92.239	TK(1)LTLEFLR	3	-2.4094	1
A0A1S3XHV7	448	K	ABC transporter B family member 25-like	1	LOC107765170	1	0.0267259	82.426	FYDPIK(1)GK	2	-1.2461	1
A0A1S4DG37	10	K	Eukaryotic translation initiation factor 3 subunit G	3	LOC107829260	1	1.07276e-24	158.56	AVEATNQPK(1)LR	2	-0.14681	1	1	5.88433e-31	168.22	AVEATNQPK(1)LR	2	0.17582	2	1	2.02478e-08	141.08	AVEATNQPK(1)LR	2	-0.16005	1
A0A1S4BFD9	31	K	Peptidyl-prolyl cis-trans isomerase	2	LOC107807631								1	0.000331471	81.643	VVMELFNDVVPK(1)TADNFR	3	-0.67207	2	1	1.02324e-05	92.096	VVMELFNDVVPK(1)TADNFR	3	-0.18262	1
P68173	15	K	Adenosylhomocysteinase	3	SAHH	1	0.000384264	97.797	EYK(1)VK(1)DMSQADFGR	3	0.16213	2	1	0.0103063	74.789	EYK(1)VK(1)DMSQADFGR	3	-0.24159	1	1	0.0024427	82.529	EYK(1)VK(1)DMSQADFGR	3	0.15688	1
A0A1S4CWF4	339	K	probably inactive leucine-rich repeat receptor-like protein kinase At5g48380	1	LOC107823351	1	0.000372329	98.898	AVLDDGTSLMVK(1)R	2	-1.904	1
A0A1S3X4M2	161	K	probable DNA double-strand break repair Rad50 ATPase	1	LOC107761164								0.999108	0.00578289	80.96	K(0.001)LEELSK(0.999)SIETIQ	3	-2.7899	1
A0A1S4CTV2	487	K	(-)-germacrene D synthase-like	1	LOC107822502	1	0.0141226	56.551	K(1)ILESK(1)WK(1)DLNR	3	0.12477	2
A0A1S3ZUI8	252	K	heat shock cognate protein 80-like	1	LOC107790625								1	1.71335e-10	137.8	IK(1)EVSNEWSLVNK	3	0.3102	4
A0A1S4AJR9	297	K	4-alpha-glucanotransferase DPE2-like isoform X1	1	LOC107798208								1	0.0329518	55.011	SFLETSMLVESEEK(1)LR	3	-1.4319	1
A0A1S3YFP5	308	K	uncharacterized protein LOC107775760	1	LOC107775760	1	0.024935	71.03	NK(1)EVEQTFVDK	2	0.79049	1
A0A1S4DRL4	309	K	calcium-dependent protein kinase 5-like	1	LOC107832719	1	0.0308095	43.405	HFSAMNK(1)LK(1)K(1)MALR	3	-3.7873	1
A0A1S4AGN4	87	K	"GDP-mannose 3,5-epimerase 1-like"	1	LOC107797479								1	0.0238693	55.806	VMDNCLK(1)VTK	3	-0.80953	1
A0A1S4A1D1	170	K	"uncharacterized protein At2g34460, chloroplastic-like"	3	LOC107792690	1	0.00732358	80.746	K(1)SGINYTIIRPGGLK	3	0.33033	2	1	0.00456222	82.483	K(1)SGINYTIIRPGGLK	3	0.065108	1	1	2.43036e-07	122.63	K(1)SGINYTIIRPGGLK	3	-0.021808	2
A0A1S3XJZ1	34	K	Plasma membrane ATPase	3	LOC107765797	1	0.0303651	47.506	CTK(1)EGLSGPAAQER	3	0.41064	1	1	0.0128902	57.794	CTK(1)EGLSGPAAQER	3	-0.52768	1	1	0.00523512	65.038	CTK(1)EGLSGPAAQER	3	0.13057	1
A0A140G1Q8	327	K	Photosystem II CP43 reaction center protein	3	psbC	1	7.31801e-12	124.84	LGANVGSAQGPTGLGK(1)YLMR	3	0.43742	2	1	6.73545e-05	82.865	LGANVGSAQGPTGLGK(1)YLMR	3	0.18916	2	1	8.1682e-14	153.36	LGANVGSAQGPTGLGK(1)YLMR	3	0.12017	2
A0A1S4BTC6	393	K	OTU domain-containing protein 5-B-like	3	LOC107811581	1	0.000611742	75.334	AAIK(1)AQQDQQIDNALLAEGR	3	0.58651	1	1	2.08367e-09	108.25	AAIK(1)AQQDQQIDNALLAEGR	3	0.11795	2	1	5.46511e-05	82.859	AAIK(1)AQQDQQIDNALLAEGR	3	0.77054	1
A0A1S4B1K7	64	K	5-oxoprolinase-like	2	LOC107803589								1	0.00408615	98.182	ILEEFTGK(1)K(1)IPR	3	-0.60475	1	1	0.00779194	74.962	ILEEFTGK(1)K(1)IPR	3	-0.11174	1
A0A1S4DJT4	296	K	ubiquitin carboxyl-terminal hydrolase 12-like isoform X4	1	LOC107830540								1	0.00303044	94.309	VLCEK(1)LEDK	2	-0.3406	2
A0A1S4B1L6	252	K	casein kinase I homolog 1-like isoform X2	1	LOC107803461								1	0.0276465	52.482	LIYQVGQK(1)R	3	-0.25333	1
A0A1S3YM56	204	K	Cysteine synthase	1	LOC107777625								0.999966	0.000201894	65.741	EQNPDIK(1)LYGVEPVESAILSGGKPGPHK	4	0.52464	2
A0A1S3XZK3	119	K	membrane steroid-binding protein 2-like	3	LOC107770471	1	0.000214926	88.565	MFYGPGGPYALFAGK(1)DASR	3	-0.44875	1	1	0.00586786	64.705	MFYGPGGPYALFAGK(1)DASR	3	-0.68993	1	1	0.0021394	64.705	MFYGPGGPYALFAGK(1)DASR	3	0.26352	1
A0A1S4A3R7	102	K	remorin-like	2	LOC107793398	1	0.00841487	102.95	K(1)ASLEAELK	3	-1.3632	2								1	0.0104455	104.43	K(1)ASLEAELK	2	-0.45328	3
A0A1S4CUX2	75	K	glutaredoxin	3	LOC107822846	1	9.31044e-06	84.946	TVPNVFIGGK(1)HIGGCDATTALHR	5	-0.21177	3	1	9.5736e-10	97.589	TVPNVFIGGK(1)HIGGCDATTALHR	4	-0.7994	3	1	3.27786e-08	91.276	TVPNVFIGGK(1)HIGGCDATTALHR	3	-1.9224	4
A0A1S4DAF5	174	K	uncharacterized protein LOC107827684	1	LOC107827684	1	0.00686424	78.616	GFGATK(1)R	2	0.21524	1
Q9FSF0	119	K	Malate dehydrogenase	3	MD1	1	6.10153e-05	101.43	SQASALEK(1)HAAPNCK	3	0.20433	1	1	0.000317063	94.781	SQASALEK(1)HAAPNCK	3	-0.19654	1	1	0.000457478	100.23	SQASALEK(1)HAAPNCK	2	0.57548	2
A0A1S4ATK0	19	K	MLP-like protein 423	1	LOC107801079								1	0.000965762	103.21	TPADK(1)FWNSIR	3	-0.22868	2
A0A1S4D1H7	14	K	probable ubiquitin-conjugating enzyme E2 18	3	LOC107824880	1	0.00522433	109.71	TLSK(1)IACNR	2	0.33121	2	1	0.00630455	90.05	TLSK(1)IACNR	3	-0.717	2	1	0.0124695	169.76	KTLSK(1)IACNR	2	0.10197	1
A0A1S4BUE4	257	K	probable LRR receptor-like serine/threonine-protein kinase At5g10290	3	LOC107812007	1	0.000291133	107.06	GVLNDGTK(1)VAVK	3	0.62314	2	1	0.000938422	97.163	GVLNDGTK(1)VAVK	3	0.56607	2	1	0.00408267	73.435	GVLNDGTK(1)VAVK	3	-0.18613	2
Q9LW96	95	K	Inositol-3-phosphate synthase	3		1	0.000299333	85.203	DK(1)VQQANYFGSLTQASTIR	3	-0.081186	2	1	1.73753e-12	123	DK(1)VQQANYFGSLTQASTIR	3	-0.55275	2	1	1.20209e-12	118.37	DK(1)VQQANYFGSLTQASTIR	3	0.034986	1
A0A1S3ZM50	244	K	Bidirectional sugar transporter SWEET	3	LOC107788219	1	0.00204162	74.89	K(1)LPELTQEQIIDIVK	3	0.75978	1	1	1.01697e-13	140.77	K(1)LPELTQEQIIDIVK	3	-0.31367	1	1	2.26653e-05	107.69	K(1)LPELTQEQIIDIVK	3	0.12487	2
A0A1S4B5A2	133	K	probable voltage-gated potassium channel subunit beta	3	LOC107804707	1	0.0242759	53.211	FALENYK(1)NLANR	3	-0.65828	1	1	0.00128787	92.611	FALENYK(1)NLANR	3	1.4915	2	1	0.00476291	82.494	FALENYK(1)NLANR	3	1.0722	2
A0A1S4DG91	125	K	NHP2-like protein 1	2	LOC107829442	1	0.0062033	104.06	DAIEK(1)LLI	2	-0.23156	1								1	0.0315289	77.318	DAIEK(1)LLI	2	-0.044863	1
Q06BK4	10	K	Water channel protein	3	LOC107778528	1	5.65394e-32	217.2	AENK(1)EEDVK(1)LGANK	2	-1.0875	13	1	8.86e-167	250.52	AENK(1)EEDVK(1)LGANK	3	0.29696	8	1	3.23394e-09	190.57	AENK(1)EEDVK(1)LGANK	2	-1.6388	8
A0A1S4C2S1	49	K	40S ribosomal protein S2-3-like	2	LOC107814537	1	0.0123817	68.016	WVPVTK(1)LGR	3	-1.6416	1								1	0.0116157	63.534	WVPVTK(1)LGR	3	-0.78857	1
A0A1S4D491	11	K	WAT1-related protein	3	LOC107825861	1	0.00207084	110.08	ADTSGSATSK(1)R	2	0.45247	1	1	5.1039e-18	156.01	ADTSGSATSK(1)R	2	-0.31646	1	1	0.00118625	101.89	ADTSGSATSK(1)R	2	1.0836	1
A0A1S3Z6X4	6	K	ubiquitin receptor RAD23c-like	2	LOC107783652	1	0.0144249	124.59	IFVK(1)TLK	2	-0.14172	1	1	7.60166e-12	157.21	IFVK(1)TLK	2	0.13686	1
A0A1S3Z159	276	K	bifunctional UDP-glucose 4-epimerase and UDP-xylose 4-epimerase 1-like	2	LOC107781891	1	2.00201e-08	118.55	QNDLGCVAYNLGTGK(1)GK	3	0.13429	1								1	1.3134e-12	130.47	QNDLGCVAYNLGTGK(1)GK	3	0.097268	2
A0A1S4CY86	746	K	"probable glutamyl endopeptidase, chloroplastic"	3	LOC107823911	1	0.000565935	83.856	HCAYSSDVK(1)ADLNACK	2	1.5961	2	1	0.000526122	86.777	HCAYSSDVK(1)ADLNACK	4	0.10794	2	1	1.77879e-09	141.06	HCAYSSDVK(1)ADLNACK	2	-0.10118	3
A0A1S3ZH41	419	K	Glycosyltransferase	1	LOC107786771								1	0.0301995	80.755	ELMEGEK(1)GK	2	0.14875	1
A0A1S4CDB0	118	K	TOM1-like protein 2	1	LOC107817777								1	0.0311177	46.704	NCEK(1)AFSEIAAER	3	0.58125	1
A0A1S4DN70	24	K	Vacuolar cation/proton exchanger	1	LOC107831601								0.940797	3.53455e-08	84.327	SSSSAPAAETWLLENGNIK(0.059)PLSK(0.941)EMR	3	1.215	1
A0A1S3Y1J2	101	K	"BAG family molecular chaperone regulator 8, chloroplastic-like"	2	LOC107771266								1	0.000233684	115.91	VNK(1)IPEQQTQR	2	-0.5404	2	1	0.00205642	89.561	VNK(1)IPEQQTQR	3	-0.31437	1
A0A1S4DPE9	189	K	pto-interacting protein 1-like	3	LOC107832028	1	0.00104659	74.649	GLEYLHEK(1)AQPHIIHR	4	-0.85121	2	1	7.11654e-05	94.023	GLEYLHEK(1)AQPHIIHR	3	-0.14765	5	1	0.000701352	79.614	GLEYLHEK(1)AQPHIIHR	3	-0.77385	5
A0A1S4A2G2	334	K	condensin-2 complex subunit H2-like	2	LOC107793052	1	0.0360177	51.066	PYK(1)K(1)VK(1)SNR	3	-2.4825	1								1	0.01214	67.897	PYK(1)K(1)VK(1)SNR	3	-2.9964	2
A0A1S4CZG2	127	K	uncharacterized protein LOC107824303 isoform X2	1	LOC107824303	0.998902	0.00558069	67.095	K(0.841)EAMK(0.16)FLEK(0.999)LTTCMGK	3	0.97513	1
A0A1S4A291	208	K	tetraspanin-19-like	1	LOC107792969								1	0.0287595	50.873	NYVPSPSYVVGDPVYGSK(1)NDAWNIR	3	-7.5248e-05	1
A0A075F2H4	132	K	Ubiquitin-conjugating enzyme E2 36-like protein	3	Ubc13-2	1	0.00181214	81.789	HWK(1)SNEAEAVETAK	3	0.3505	1	1	8.0462e-07	125.53	HWK(1)SNEAEAVETAK	2	0.82542	3	1	0.0010122	88.282	HWK(1)SNEAEAVETAK	2	0.24672	3
A0A1S4CBS3	30	K	craniofacial development protein 2-like	1	LOC107817386	1	0.0091801	78.113	K(1)HFWEGLDK	2	-2.6566	1
A0A1S4CCA7	146	K	"organellar oligopeptidase A, chloroplastic/mitochondrial-like"	3	LOC107817521	1	0.000337003	137.01	LVEPLEK(1)IVDR	2	0.082076	5	1	3.94165e-13	147.62	LVEPLEK(1)IVDR	2	0.52729	6	1	8.10831e-05	155.97	LVEPLEK(1)IVDR	2	-0.17457	3
A0A1S3YWW8	41	K	peroxisomal membrane protein 11-4-like	3	LOC107780761	0.99997	1.64236e-05	104.2	K(1)LLTEEEESKETEGEIK	3	0.20789	3	0.999999	3.02791e-05	98.552	K(1)LLTEEEESKETEGEIKK	3	-0.66536	3	0.999976	0.0112572	64.476	K(1)LLTEEEESKETEGEIK	3	1.4068	2
A0A1S4B436	5	K	REF/SRPP-like protein At1g67360	2	LOC107804268								1	0.00163528	111.61	ATNK(1)VEMEK	2	0.51265	1	1	0.00318268	93.096	ATNK(1)VEMEK	2	1.7014	1
A0A1S3XDP9	54	K	peroxiredoxin-2B-like	2	LOC107763907								1	4.26128e-06	82.381	VILFAVPGAFTPTCSTK(1)HVPGFIEK	4	-0.17169	2	1	8.85468e-05	69.98	VILFAVPGAFTPTCSTK(1)HVPGFIEK	4	-1.3158	1
A0A1S3YM56	49	K	Cysteine synthase	1	LOC107777625	1	0.00419417	73.877	LESMEPCSSVK(1)DR	3	0.49161	2

## Sheet: Table S2
Table S2. Identifed lysine-ubiquitinated sites in tobacco.
Protein accession	Position	Amino acid	Protein description	Subcellular location	Biological process	Cellular component	Molecular function	KEGG KO No.	KEGG Gene	KEGG pathway	IPR ID	Domain description
A0A1S3X993	67	K	small glutamine-rich tetratricopeptide repeat-containing protein alpha-like isoform X3	nucleus			GO:0005515 protein binding; GO:0005488 binding;	K16365	SGTA; small glutamine-rich tetratricopeptide repeat-containing protein alpha		IPR011990; IPR013026;	Tetratricopeptide-like helical domain; Tetratricopeptide repeat-containing domain;
A0A1S4DK77	528	K	probable inactive receptor kinase At1g27190	plasma membrane	GO:0016310 phosphorylation; GO:0044267 cellular protein metabolic process; GO:0044238 primary metabolic process; GO:0044237 cellular metabolic process; GO:0006796 phosphate-containing compound metabolic process; GO:0071704 organic substance metabolic process; GO:0008152 metabolic process; GO:0006468 protein phosphorylation; GO:0006793 phosphorus metabolic process; GO:0044260 cellular macromolecul…		GO:0005524 ATP binding; GO:1901265 nucleoside phosphate binding; GO:0016773 phosphotransferase activity, alcohol group as acceptor; GO:0001882 nucleoside binding; GO:0043167 ion binding; GO:0005515 protein binding; GO:0004672 protein kinase activity; GO:0000166 nucleotide binding; GO:0097159 organic cyclic compound binding; GO:1901363 heterocyclic compound binding; GO:0032549 ribonucleoside bindi…				IPR000719; IPR013210; IPR001245; IPR032675; IPR011009;	Protein kinase domain; Leucine-rich repeat-containing N-terminal, plant-type; Serine-threonine/tyrosine-protein kinase catalytic domain; Leucine-rich repeat domain, L domain-like; Protein kinase-like domain;
A0A1S4C6S2	25	K	26S protease regulatory subunit S10B homolog B-like	cytoplasm	GO:1901575 organic substance catabolic process; GO:0008152 metabolic process; GO:0030163 protein catabolic process; GO:0009057 macromolecule catabolic process; GO:0043170 macromolecule metabolic process; GO:0019538 protein metabolic process; GO:0044238 primary metabolic process; GO:0009056 catabolic process; GO:0071704 organic substance metabolic process;	GO:0044424 intracellular part; GO:0005623 cell; GO:0044464 cell part; GO:0005622 intracellular; GO:0005737 cytoplasm;	GO:0005524 ATP binding; GO:1901265 nucleoside phosphate binding; GO:0001882 nucleoside binding; GO:0043167 ion binding; GO:0016787 hydrolase activity; GO:0000166 nucleotide binding; GO:0097159 organic cyclic compound binding; GO:1901363 heterocyclic compound binding; GO:0032549 ribonucleoside binding; GO:0097367 carbohydrate derivative binding; GO:0003824 catalytic activity; GO:0032553 ribonucleo…	K03064	PSMC6, RPT4; 26S proteasome regulatory subunit T4	nta03050 Proteasome - Nicotiana tabacum (common tobacco);	IPR003593; IPR003959; IPR027417;	AAA+ ATPase domain; ATPase, AAA-type, core; P-loop containing nucleoside triphosphate hydrolase;
A0A1S4D0S8	166	K	remorin-like	nucleus							IPR005516; IPR005518;	Remorin, C-terminal; Remorin, N-terminal;
A0A1S4BXY1	649	K	receptor-like protein kinase FERONIA	plasma membrane	GO:0016310 phosphorylation; GO:0044267 cellular protein metabolic process; GO:0044238 primary metabolic process; GO:0044237 cellular metabolic process; GO:0006796 phosphate-containing compound metabolic process; GO:0071704 organic substance metabolic process; GO:0008152 metabolic process; GO:0006468 protein phosphorylation; GO:0006793 phosphorus metabolic process; GO:0044260 cellular macromolecul…		GO:0005524 ATP binding; GO:1901265 nucleoside phosphate binding; GO:0016773 phosphotransferase activity, alcohol group as acceptor; GO:0001882 nucleoside binding; GO:0043167 ion binding; GO:0004672 protein kinase activity; GO:0000166 nucleotide binding; GO:0097159 organic cyclic compound binding; GO:1901363 heterocyclic compound binding; GO:0032549 ribonucleoside binding; GO:0097367 carbohydrate …				IPR000719; IPR001245; IPR013320; IPR024788; IPR011009;	Protein kinase domain; Serine-threonine/tyrosine-protein kinase catalytic domain; Concanavalin A-like lectin/glucanase domain; Malectin-like carbohydrate-binding domain; Protein kinase-like domain;
P68173	53	K	Adenosylhomocysteinase	cytoplasm	GO:1901606 alpha-amino acid catabolic process; GO:0009116 nucleoside metabolic process; GO:0042278 purine nucleoside metabolic process; GO:0046498 S-adenosylhomocysteine metabolic process; GO:0006725 cellular aromatic compound metabolic process; GO:0044699 single-organism process; GO:0072523 purine-containing compound catabolic process; GO:0044237 cellular metabolic process; GO:0071704 organic su…		GO:0097159 organic cyclic compound binding; GO:1901363 heterocyclic compound binding; GO:0004013 adenosylhomocysteinase activity; GO:0016801 hydrolase activity, acting on ether bonds; GO:1901265 nucleoside phosphate binding; GO:0051287 NAD binding; GO:0003824 catalytic activity; GO:0005488 binding; GO:0016787 hydrolase activity; GO:0000166 nucleotide binding; GO:0048037 cofactor binding; GO:00168…	K01251	E3.3.1.1, ahcY; adenosylhomocysteinase [EC:3.3.1.1]	nta00270 Cysteine and methionine metabolism - Nicotiana tabacum (common tobacco); nta01100 Metabolic pathways - Nicotiana tabacum (common tobacco);	IPR016040; IPR015878;	NAD(P)-binding domain; S-adenosyl-L-homocysteine hydrolase, NAD binding domain;
A0A1S3Y0V1	67	K	S-adenosylmethionine synthase	cytoskeleton	GO:0051188 cofactor biosynthetic process; GO:0006790 sulfur compound metabolic process; GO:0046500 S-adenosylmethionine metabolic process; GO:0009058 biosynthetic process; GO:0006732 coenzyme metabolic process; GO:1901576 organic substance biosynthetic process; GO:0044237 cellular metabolic process; GO:0044272 sulfur compound biosynthetic process; GO:0044249 cellular biosynthetic process; GO:0051…		GO:0005524 ATP binding; GO:1901265 nucleoside phosphate binding; GO:0001882 nucleoside binding; GO:0043167 ion binding; GO:0000166 nucleotide binding; GO:0004478 methionine adenosyltransferase activity; GO:0097159 organic cyclic compound binding; GO:1901363 heterocyclic compound binding; GO:0032549 ribonucleoside binding; GO:0097367 carbohydrate derivative binding; GO:0003824 catalytic activity; …	K00789	metK; S-adenosylmethionine synthetase [EC:2.5.1.6]	nta00270 Cysteine and methionine metabolism - Nicotiana tabacum (common tobacco); nta01100 Metabolic pathways - Nicotiana tabacum (common tobacco); nta01110 Biosynthesis of secondary metabolites - Nicotiana tabacum (common tobacco); nta01230 Biosynthesis of amino acids - Nicotiana tabacum (common tobacco);	IPR022636; IPR022628; IPR022630; IPR022629;	S-adenosylmethionine synthetase superfamily; S-adenosylmethionine synthetase, N-terminal; S-adenosylmethionine synthetase, C-terminal; S-adenosylmethionine synthetase, central domain;
O49911	37	K	Plasma membrane polypeptide	nucleus	GO:0051716 cellular response to stimulus; GO:0050896 response to stimulus; GO:0009987 cellular process;	GO:0016020 membrane; GO:0031226 intrinsic component of plasma membrane; GO:0044459 plasma membrane part; GO:0044425 membrane part; GO:0044464 cell part; GO:0071944 cell periphery; GO:0031225 anchored component of membrane; GO:0031224 intrinsic component of membrane; GO:0005623 cell; GO:0046658 anchored component of plasma membrane; GO:0005886 plasma membrane;
A0A1S3X5I0	89	K	Carbonic anhydrase	cytoplasm	GO:0015976 carbon utilization; GO:0044699 single-organism process;		GO:0046914 transition metal ion binding; GO:0003824 catalytic activity; GO:0005488 binding; GO:0043167 ion binding; GO:0016829 lyase activity; GO:0046872 metal ion binding; GO:0043169 cation binding; GO:0016836 hydro-lyase activity; GO:0008270 zinc ion binding; GO:0004089 carbonate dehydratase activity; GO:0016835 carbon-oxygen lyase activity;	K01673	cynT, can; carbonic anhydrase [EC:4.2.1.1]	nta00910 Nitrogen metabolism - Nicotiana tabacum (common tobacco);
A0A1S4AQZ9	95	K	uncharacterized protein LOC107800289 isoform X4	plasma membrane			GO:0043169 cation binding; GO:0046872 metal ion binding; GO:0008270 zinc ion binding; GO:0046914 transition metal ion binding; GO:0005488 binding; GO:0043167 ion binding;				IPR013083; IPR011016;	Zinc finger, RING/FYVE/PHD-type; Zinc finger, RING-CH-type;
A0A1S3YPC7	523	K	protein SIEVE ELEMENT OCCLUSION B-like isoform X2
A0A1S4BX25	84	K	uncharacterized protein LOC107812797	extracellular
I7GVS5	318	K	Heat shock protein 70	cytoplasm			GO:0005524 ATP binding; GO:1901265 nucleoside phosphate binding; GO:0001882 nucleoside binding; GO:0043167 ion binding; GO:0000166 nucleotide binding; GO:0097159 organic cyclic compound binding; GO:1901363 heterocyclic compound binding; GO:0032549 ribonucleoside binding; GO:0097367 carbohydrate derivative binding; GO:0032553 ribonucleotide binding; GO:0005488 binding; GO:0032550 purine ribonucleo…	K03283	HSPA1s; heat shock 70kDa protein 1/2/6/8	nta03040 Spliceosome - Nicotiana tabacum (common tobacco); nta04141 Protein processing in endoplasmic reticulum - Nicotiana tabacum (common tobacco); nta04144 Endocytosis - Nicotiana tabacum (common tobacco);	IPR029048; IPR029047;	Heat shock protein 70kD, C-terminal domain; Heat shock protein 70kD, peptide-binding domain;
A0A1S3ZP17	96	K	MFP1 attachment factor 1-like	nucleus							IPR025265;	WPP domain;
A0A1S3YZU3	943	K	Plasma membrane ATPase	plasma membrane	GO:0009116 nucleoside metabolic process; GO:0042278 purine nucleoside metabolic process; GO:0009167 purine ribonucleoside monophosphate metabolic process; GO:0009117 nucleotide metabolic process; GO:0044699 single-organism process; GO:0046129 purine ribonucleoside biosynthetic process; GO:0009163 nucleoside biosynthetic process; GO:0009058 biosynthetic process; GO:0009156 ribonucleoside monophosp…	GO:0031224 intrinsic component of membrane; GO:0016020 membrane; GO:0016021 integral component of membrane; GO:0044425 membrane part;	GO:1901265 nucleoside phosphate binding; GO:0043167 ion binding; GO:0016817 hydrolase activity, acting on acid anhydrides; GO:0016787 hydrolase activity; GO:0000166 nucleotide binding; GO:0017111 nucleoside-triphosphatase activity; GO:0016887 ATPase activity; GO:1901363 heterocyclic compound binding; GO:0097159 organic cyclic compound binding; GO:0016462 pyrophosphatase activity; GO:0003824 catal…	K01535	PMA1, PMA2; H+-transporting ATPase [EC:3.6.3.6]	nta00190 Oxidative phosphorylation - Nicotiana tabacum (common tobacco);	IPR023298; IPR004014; IPR008250; IPR023299; IPR023214;	P-type ATPase, transmembrane domain; Cation-transporting P-type ATPase, N-terminal; P-type ATPase, A domain; P-type ATPase, cytoplasmic domain N; HAD-like domain;
A0A1S4CXL3	24	K	protein PPLZ12	cytoplasm
A0A1S4CQ71	240	K	actin-like	cytoskeleton				K10355	ACTF; actin, other eukaryote
A0A1S4A6P7	149	K	glucomannan 4-beta-mannosyltransferase 2-like	plasma membrane				K13680	CSLA; beta-mannan synthase [EC:2.4.1.32]		IPR029044; IPR001173;	Nucleotide-diphospho-sugar transferases; Glycosyltransferase 2-like;
A0A1S4AKW3	306	K	"ribulose bisphosphate carboxylase/oxygenase activase 2, chloroplastic-like"	chloroplast			GO:0005524 ATP binding; GO:1901265 nucleoside phosphate binding; GO:0001882 nucleoside binding; GO:0043167 ion binding; GO:0000166 nucleotide binding; GO:0097159 organic cyclic compound binding; GO:1901363 heterocyclic compound binding; GO:0032549 ribonucleoside binding; GO:0097367 carbohydrate derivative binding; GO:0032553 ribonucleotide binding; GO:0005488 binding; GO:0032550 purine ribonucleo…				IPR003959; IPR027417;	ATPase, AAA-type, core; P-loop containing nucleoside triphosphate hydrolase;
A0A1S4DQ90	54	K	PI-PLC X-box domain-containing protein DDB_G0293730-like	cytoplasm	GO:0044699 single-organism process; GO:0008152 metabolic process; GO:0044238 primary metabolic process; GO:0044710 single-organism metabolic process; GO:0006629 lipid metabolic process; GO:0071704 organic substance metabolic process;		GO:0008081 phosphoric diester hydrolase activity; GO:0016787 hydrolase activity; GO:0003824 catalytic activity; GO:0042578 phosphoric ester hydrolase activity; GO:0016788 hydrolase activity, acting on ester bonds;				IPR000909; IPR017946;	Phosphatidylinositol-specific phospholipase C, X domain; PLC-like phosphodiesterase, TIM beta/alpha-barrel domain;
A0A1S4B4R3	86	K	inactive leucine-rich repeat receptor-like protein kinase CORYNE	chloroplast	GO:0016310 phosphorylation; GO:0044267 cellular protein metabolic process; GO:0044238 primary metabolic process; GO:0044237 cellular metabolic process; GO:0006796 phosphate-containing compound metabolic process; GO:0071704 organic substance metabolic process; GO:0008152 metabolic process; GO:0006468 protein phosphorylation; GO:0006793 phosphorus metabolic process; GO:0044260 cellular macromolecul…		GO:0005524 ATP binding; GO:1901265 nucleoside phosphate binding; GO:0016773 phosphotransferase activity, alcohol group as acceptor; GO:0001882 nucleoside binding; GO:0043167 ion binding; GO:0004672 protein kinase activity; GO:0000166 nucleotide binding; GO:0097159 organic cyclic compound binding; GO:1901363 heterocyclic compound binding; GO:0032549 ribonucleoside binding; GO:0097367 carbohydrate …				IPR000719; IPR011009;	Protein kinase domain; Protein kinase-like domain;
A0A1S4AXD3	142	K	Histone H2B	nucleus		GO:0043229 intracellular organelle; GO:0043232 intracellular non-membrane-bounded organelle; GO:0044446 intracellular organelle part; GO:0032991 macromolecular complex; GO:0044424 intracellular part; GO:0005623 cell; GO:0044422 organelle part; GO:0044427 chromosomal part; GO:0043228 non-membrane-bounded organelle; GO:0000786 nucleosome; GO:0043226 organelle; GO:0000785 chromatin; GO:0044464 cell …	GO:0097159 organic cyclic compound binding; GO:1901363 heterocyclic compound binding; GO:0003677 DNA binding; GO:0046982 protein heterodimerization activity; GO:0005488 binding; GO:0046983 protein dimerization activity; GO:0003676 nucleic acid binding; GO:0005515 protein binding;	K11252	H2B; histone H2B		IPR009072; IPR007125;	Histone-fold; Histone H2A/H2B/H3;
A0A076L1Z5	75	K	Remorin 2	mitochondria							IPR005516; IPR005518;	Remorin, C-terminal; Remorin, N-terminal;
A0A1S4DNV0	58	K	kinesin-like protein KCA2
A0A1S3XAN2	218	K	"6-phosphofructo-2-kinase/fructose-2, 6-bisphosphatase-like isoform X6"	chloroplast	GO:0044281 small molecule metabolic process; GO:0044699 single-organism process; GO:0005975 carbohydrate metabolic process; GO:0044238 primary metabolic process; GO:0044237 cellular metabolic process; GO:0006796 phosphate-containing compound metabolic process; GO:0071704 organic substance metabolic process; GO:0044723 single-organism carbohydrate metabolic process; GO:0008152 metabolic process; G…		GO:0005524 ATP binding; GO:1901265 nucleoside phosphate binding; GO:0016773 phosphotransferase activity, alcohol group as acceptor; GO:0001882 nucleoside binding; GO:0043167 ion binding; GO:0000166 nucleotide binding; GO:0097159 organic cyclic compound binding; GO:1901363 heterocyclic compound binding; GO:0032549 ribonucleoside binding; GO:0019200 carbohydrate kinase activity; GO:0097367 carbohyd…	K01103	PFKFB3; 6-phosphofructo-2-kinase / fructose-2,6-biphosphatase 3 [EC:2.7.1.105 3.1.3.46]	nta00051 Fructose and mannose metabolism - Nicotiana tabacum (common tobacco);	IPR027417; IPR013079;	P-loop containing nucleoside triphosphate hydrolase; 6-phosphofructo-2-kinase;
A0A1S3X344	840	K	uncharacterized protein LOC107760560	cytoplasm	GO:0008152 metabolic process; GO:0055114 oxidation-reduction process; GO:0044710 single-organism metabolic process; GO:0044699 single-organism process; GO:0044238 primary metabolic process; GO:0005975 carbohydrate metabolic process; GO:0071704 organic substance metabolic process;		GO:1901265 nucleoside phosphate binding; GO:0043167 ion binding; GO:0016829 lyase activity; GO:0000166 nucleotide binding; GO:0008270 zinc ion binding; GO:0048037 cofactor binding; GO:0016491 oxidoreductase activity; GO:0097159 organic cyclic compound binding; GO:0016614 oxidoreductase activity, acting on CH-OH group of donors; GO:1901363 heterocyclic compound binding; GO:0016616 oxidoreductase a…				IPR006115; IPR013785; IPR008927; IPR013328; IPR010737; IPR029154; IPR031475; IPR016040;	6-phosphogluconate dehydrogenase, NADP-binding; Aldolase-type TIM barrel; 6-phosphogluconate dehydrogenase C-terminal domain-like; 6-phosphogluconate dehydrogenase, domain 2; Putative sugar-binding, N-terminal domain; 3-hydroxyisobutyrate dehydrogenase, NAD-binding domain; Putative nucleotide-binding C-terminal domain; NAD(P)-binding domain;
A0A1S4B8V7	41	K	V-type proton ATPase subunit B2-like	cytoskeleton	GO:0009116 nucleoside metabolic process; GO:0042278 purine nucleoside metabolic process; GO:0034220 ion transmembrane transport; GO:0006725 cellular aromatic compound metabolic process; GO:0009167 purine ribonucleoside monophosphate metabolic process; GO:0090662 ATP hydrolysis coupled transmembrane transport; GO:0009259 ribonucleotide metabolic process; GO:0009117 nucleotide metabolic process; GO…	GO:0032991 macromolecular complex; GO:0016020 membrane; GO:0033178 proton-transporting two-sector ATPase complex, catalytic domain; GO:0033176 proton-transporting V-type ATPase complex; GO:0043234 protein complex; GO:0098796 membrane protein complex; GO:0044425 membrane part; GO:0016469 proton-transporting two-sector ATPase complex; GO:0033180 proton-transporting V-type ATPase, V1 domain;	GO:0022804 active transmembrane transporter activity; GO:0005524 ATP binding; GO:1901265 nucleoside phosphate binding; GO:0001882 nucleoside binding; GO:0043167 ion binding; GO:0016817 hydrolase activity, acting on acid anhydrides; GO:0016787 hydrolase activity; GO:0000166 nucleotide binding; GO:0097159 organic cyclic compound binding; GO:1901363 heterocyclic compound binding; GO:0032549 ribonucl…	K02147	ATPeV1B, ATP6B; V-type H+-transporting ATPase subunit B	nta00190 Oxidative phosphorylation - Nicotiana tabacum (common tobacco); nta01100 Metabolic pathways - Nicotiana tabacum (common tobacco); nta04145 Phagosome - Nicotiana tabacum (common tobacco);	IPR004100; IPR000194; IPR027417;	ATPase, F1/V1/A1 complex, alpha/beta subunit, N-terminal domain; ATPase, F1/V1/A1 complex, alpha/beta subunit, nucleotide-binding domain; P-loop containing nucleoside triphosphate hydrolase;
A0A1S3ZXV6	104	K	Phosphoinositide phospholipase C	mitochondria	GO:0050794 regulation of cellular process; GO:0044700 single organism signaling; GO:0051716 cellular response to stimulus; GO:0035556 intracellular signal transduction; GO:0044699 single-organism process; GO:0044238 primary metabolic process; GO:0023052 signaling; GO:0050896 response to stimulus; GO:0071704 organic substance metabolic process; GO:0007165 signal transduction; GO:0008152 metabolic …		GO:0004435 phosphatidylinositol phospholipase C activity; GO:0003824 catalytic activity; GO:0042578 phosphoric ester hydrolase activity; GO:0005488 binding; GO:0004629 phospholipase C activity; GO:0016788 hydrolase activity, acting on ester bonds; GO:0004620 phospholipase activity; GO:0005515 protein binding; GO:0016787 hydrolase activity; GO:0008081 phosphoric diester hydrolase activity; GO:0016…	K05857	PLCD; phosphatidylinositol phospholipase C, delta [EC:3.1.4.11]	nta00562 Inositol phosphate metabolism - Nicotiana tabacum (common tobacco); nta01100 Metabolic pathways - Nicotiana tabacum (common tobacco); nta04070 Phosphatidylinositol signaling system - Nicotiana tabacum (common tobacco); nta04933 AGE-RAGE signaling pathway in diabetic complications - Nicotiana tabacum (common tobacco);	IPR000909; IPR015359; IPR017946; IPR011992; IPR000008; IPR001711;	Phosphatidylinositol-specific phospholipase C, X domain; Phosphoinositide-specific phospholipase C, EF-hand-like domain; PLC-like phosphodiesterase, TIM beta/alpha-barrel domain; EF-hand domain pair; C2 domain; Phospholipase C, phosphatidylinositol-specific, Y domain;
A0A1S3YYA3	28	K	ubiquitin receptor RAD23b-like isoform X3	chloroplast	GO:0033554 cellular response to stress; GO:0051603 proteolysis involved in cellular protein catabolic process; GO:0044257 cellular protein catabolic process; GO:0006725 cellular aromatic compound metabolic process; GO:0006259 DNA metabolic process; GO:0006289 nucleotide-excision repair; GO:0044267 cellular protein metabolic process; GO:0050896 response to stimulus; GO:0044237 cellular metabolic p…	GO:0043226 organelle; GO:0043231 intracellular membrane-bounded organelle; GO:0043229 intracellular organelle; GO:0005634 nucleus; GO:0044464 cell part; GO:0005622 intracellular; GO:0044424 intracellular part; GO:0043227 membrane-bounded organelle; GO:0005623 cell;	GO:0097159 organic cyclic compound binding; GO:1901363 heterocyclic compound binding; GO:0003677 DNA binding; GO:0003684 damaged DNA binding; GO:0005515 protein binding; GO:0005488 binding; GO:0003676 nucleic acid binding;	K10839	RAD23, HR23; UV excision repair protein RAD23	nta03420 Nucleotide excision repair - Nicotiana tabacum (common tobacco); nta04141 Protein processing in endoplasmic reticulum - Nicotiana tabacum (common tobacco);	IPR015940; IPR029071; IPR000626; IPR015360; IPR009060;	Ubiquitin-associated domain; Ubiquitin-related domain; Ubiquitin domain; XPC-binding domain; UBA-like;
A0A1S3YNM7	126	K	ubiquitin-conjugating enzyme E2 variant 1C isoform X2	nucleus				K10704			IPR016135; IPR000608;	Ubiquitin-conjugating enzyme/RWD-like; Ubiquitin-conjugating enzyme E2;
A0A1S4AAI5	55	K	V-type proton ATPase subunit a	chloroplast	GO:0098655 cation transmembrane transport; GO:0034220 ion transmembrane transport; GO:0098660 inorganic ion transmembrane transport; GO:0090662 ATP hydrolysis coupled transmembrane transport; GO:0015988 energy coupled proton transmembrane transport, against electrochemical gradient; GO:0044699 single-organism process; GO:0006818 hydrogen transport; GO:0015992 proton transport; GO:0051234 establis…	GO:0043229 intracellular organelle; GO:0033179 proton-transporting V-type ATPase, V0 domain; GO:0016020 membrane; GO:0000220 vacuolar proton-transporting V-type ATPase, V0 domain; GO:0098588 bounding membrane of organelle; GO:0031090 organelle membrane; GO:0098796 membrane protein complex; GO:0005737 cytoplasm; GO:0044446 intracellular organelle part; GO:0032991 macromolecular complex; GO:0044424…	GO:0015075 ion transmembrane transporter activity; GO:0022892 substrate-specific transporter activity; GO:0015077 monovalent inorganic cation transmembrane transporter activity; GO:0022890 inorganic cation transmembrane transporter activity; GO:0015078 hydrogen ion transmembrane transporter activity; GO:0008324 cation transmembrane transporter activity; GO:0022891 substrate-specific transmembrane…	K02154	ATPeV0A, ATP6N; V-type H+-transporting ATPase subunit a	nta00190 Oxidative phosphorylation - Nicotiana tabacum (common tobacco); nta01100 Metabolic pathways - Nicotiana tabacum (common tobacco); nta04145 Phagosome - Nicotiana tabacum (common tobacco);
A0A1S4A2G2	336	K	condensin-2 complex subunit H2-like	nucleus				K11490			IPR009378; IPR031719; IPR031737;	Condensin II complex subunit H2, N-terminal; Condensin II complex subunit H2, middle domain; Condensin-2 complex subunit H2, C-terminal;
A0A1S4CIE4	87	K	60S ribosomal protein L13-1-like	chloroplast	GO:0006518 peptide metabolic process; GO:0043043 peptide biosynthetic process; GO:0044267 cellular protein metabolic process; GO:0006807 nitrogen compound metabolic process; GO:0009058 biosynthetic process; GO:0043603 cellular amide metabolic process; GO:0044238 primary metabolic process; GO:1901566 organonitrogen compound biosynthetic process; GO:1901576 organic substance biosynthetic process; G…	GO:0005840 ribosome; GO:0043226 organelle; GO:0043229 intracellular organelle; GO:0043232 intracellular non-membrane-bounded organelle; GO:0044464 cell part; GO:0005622 intracellular; GO:0005737 cytoplasm; GO:0032991 macromolecular complex; GO:0044424 intracellular part; GO:1990904 ribonucleoprotein complex; GO:0005623 cell; GO:0030529 intracellular ribonucleoprotein complex; GO:0044444 cytoplasm…	GO:0003735 structural constituent of ribosome; GO:0005198 structural molecule activity;	K02873	RP-L13e; large subunit ribosomal protein L13e	nta03010 Ribosome - Nicotiana tabacum (common tobacco);
A0A1S3X643	66	K	sm-like protein LSM36B	nucleus				K12625	LSM6; U6 snRNA-associated Sm-like protein LSm6	nta03018 RNA degradation - Nicotiana tabacum (common tobacco); nta03040 Spliceosome - Nicotiana tabacum (common tobacco);	IPR001163; IPR010920;	LSM domain, eukaryotic/archaea-type; LSM domain;
A0A140G1Q8	370	K	Photosystem II CP43 reaction center protein	plasma membrane	GO:0055114 oxidation-reduction process; GO:0044267 cellular protein metabolic process; GO:0044763 single-organism cellular process; GO:0044699 single-organism process; GO:0019684 photosynthesis, light reaction; GO:0044238 primary metabolic process; GO:0044237 cellular metabolic process; GO:0071704 organic substance metabolic process; GO:0009772 photosynthetic electron transport in photosystem II;…	GO:0043229 intracellular organelle; GO:0016020 membrane; GO:0009523 photosystem II; GO:0098796 membrane protein complex; GO:0005737 cytoplasm; GO:0042651 thylakoid membrane; GO:0031224 intrinsic component of membrane; GO:0032991 macromolecular complex; GO:0044424 intracellular part; GO:0005623 cell; GO:0016021 integral component of membrane; GO:0034357 photosynthetic membrane; GO:0043226 organell…	GO:0097159 organic cyclic compound binding; GO:1901363 heterocyclic compound binding; GO:0009055 electron carrier activity; GO:0045156 electron transporter, transferring electrons within the cyclic electron transport pathway of photosynthesis activity; GO:0005488 binding; GO:0043167 ion binding; GO:0043169 cation binding; GO:0046872 metal ion binding; GO:0016168 chlorophyll binding; GO:0046906 te…	K02705	psbC; photosystem II CP43 chlorophyll apoprotein	nta00195 Photosynthesis - Nicotiana tabacum (common tobacco); nta01100 Metabolic pathways - Nicotiana tabacum (common tobacco);
A0A1S3Z6X4	51	K	ubiquitin receptor RAD23c-like	cytoplasm	GO:0033554 cellular response to stress; GO:0051603 proteolysis involved in cellular protein catabolic process; GO:0044257 cellular protein catabolic process; GO:0006725 cellular aromatic compound metabolic process; GO:0006259 DNA metabolic process; GO:0006289 nucleotide-excision repair; GO:0044267 cellular protein metabolic process; GO:0050896 response to stimulus; GO:0044237 cellular metabolic p…	GO:0043226 organelle; GO:0043231 intracellular membrane-bounded organelle; GO:0043229 intracellular organelle; GO:0005634 nucleus; GO:0044464 cell part; GO:0005622 intracellular; GO:0044424 intracellular part; GO:0043227 membrane-bounded organelle; GO:0005623 cell;	GO:0097159 organic cyclic compound binding; GO:1901363 heterocyclic compound binding; GO:0003677 DNA binding; GO:0003684 damaged DNA binding; GO:0005515 protein binding; GO:0005488 binding; GO:0003676 nucleic acid binding;	K10839	RAD23, HR23; UV excision repair protein RAD23	nta03420 Nucleotide excision repair - Nicotiana tabacum (common tobacco); nta04141 Protein processing in endoplasmic reticulum - Nicotiana tabacum (common tobacco);	IPR006636; IPR015940; IPR029071; IPR000626; IPR015360; IPR009060;	Heat shock chaperonin-binding; Ubiquitin-associated domain; Ubiquitin-related domain; Ubiquitin domain; XPC-binding domain; UBA-like;
A0A1S4AAI7	129	K	alpha-soluble NSF attachment protein-like	cytoplasm	GO:0045184 establishment of protein localization; GO:0006810 transport; GO:0046907 intracellular transport; GO:0070727 cellular macromolecule localization; GO:0051649 establishment of localization in cell; GO:0006886 intracellular protein transport; GO:0071702 organic substance transport; GO:0008104 protein localization; GO:0033036 macromolecule localization; GO:0034613 cellular protein localizat…		GO:0005515 protein binding; GO:0005488 binding; GO:0005515 protein binding; GO:0005488 binding;	K15296			IPR011990; IPR013026;	Tetratricopeptide-like helical domain; Tetratricopeptide repeat-containing domain;
A0A1S3X9H4	40	K	Nucleoside diphosphate kinase	cytoplasm	GO:0042278 purine nucleoside metabolic process; GO:0009116 nucleoside metabolic process; GO:0046132 pyrimidine ribonucleoside biosynthetic process; GO:0006165 nucleoside diphosphate phosphorylation; GO:0009147 pyrimidine nucleoside triphosphate metabolic process; GO:0009117 nucleotide metabolic process; GO:0044699 single-organism process; GO:0046129 purine ribonucleoside biosynthetic process; GO:…		GO:0016301 kinase activity; GO:0003824 catalytic activity; GO:0004550 nucleoside diphosphate kinase activity; GO:0019205 nucleobase-containing compound kinase activity; GO:0016740 transferase activity; GO:0016776 phosphotransferase activity, phosphate group as acceptor; GO:0016772 transferase activity, transferring phosphorus-containing groups;	K00940	ndk; nucleoside-diphosphate kinase [EC:2.7.4.6]	nta00230 Purine metabolism - Nicotiana tabacum (common tobacco); nta00240 Pyrimidine metabolism - Nicotiana tabacum (common tobacco); nta01110 Biosynthesis of secondary metabolites - Nicotiana tabacum (common tobacco); nta04016 MAPK signaling pathway - plant - Nicotiana tabacum (common tobacco); nta01100 Metabolic pathways - Nicotiana tabacum (common tobacco);
A0A1S4ARC4	441	K	Serine hydroxymethyltransferase	cytoskeleton	GO:0044281 small molecule metabolic process; GO:0044763 single-organism cellular process; GO:0006807 nitrogen compound metabolic process; GO:0044699 single-organism process; GO:0044238 primary metabolic process; GO:0006544 glycine metabolic process; GO:1901605 alpha-amino acid metabolic process; GO:0044237 cellular metabolic process; GO:0071704 organic substance metabolic process; GO:0008152 meta…		GO:0097159 organic cyclic compound binding; GO:1901363 heterocyclic compound binding; GO:0003824 catalytic activity; GO:0005488 binding; GO:0043167 ion binding; GO:0004372 glycine hydroxymethyltransferase activity; GO:0016741 transferase activity, transferring one-carbon groups; GO:0043168 anion binding; GO:0016742 hydroxymethyl-, formyl- and related transferase activity; GO:0048037 cofactor bind…	K00600	glyA, SHMT; glycine hydroxymethyltransferase [EC:2.1.2.1]	nta00260 Glycine, serine and threonine metabolism - Nicotiana tabacum (common tobacco); nta00460 Cyanoamino acid metabolism - Nicotiana tabacum (common tobacco); nta00630 Glyoxylate and dicarboxylate metabolism - Nicotiana tabacum (common tobacco); nta00670 One carbon pool by folate - Nicotiana tabacum (common tobacco); nta01100 Metabolic pathways - Nicotiana tabacum (common tobacco); nta01110 Bi…	IPR015424; IPR015421; IPR015422;	Pyridoxal phosphate-dependent transferase; Pyridoxal phosphate-dependent transferase, major region, subdomain 1; Pyridoxal phosphate-dependent transferase, major region, subdomain 2;
A0A1S4AG39	557	K	phototropin-1-like	chloroplast	GO:0050794 regulation of cellular process; GO:0044700 single organism signaling; GO:0016310 phosphorylation; GO:0051716 cellular response to stimulus; GO:0035556 intracellular signal transduction; GO:0044267 cellular protein metabolic process; GO:0044699 single-organism process; GO:0000160 phosphorelay signal transduction system; GO:0044238 primary metabolic process; GO:0023052 signaling; GO:0050…		GO:1901265 nucleoside phosphate binding; GO:0016773 phosphotransferase activity, alcohol group as acceptor; GO:0004672 protein kinase activity; GO:0016775 phosphotransferase activity, nitrogenous group as acceptor; GO:0004871 signal transducer activity; GO:1901363 heterocyclic compound binding; GO:0097159 organic cyclic compound binding; GO:0016301 kinase activity; GO:0032553 ribonucleotide bindi…	K20715	PHOT; phototropin [EC:2.7.11.1]		IPR000719; IPR000014; IPR000700; IPR011009;	Protein kinase domain; PAS domain; PAS-associated, C-terminal; Protein kinase-like domain;
A0A1S4BXB1	409	K	protein DA1-related 2-like isoform X2	vacuolar membrane			GO:0043169 cation binding; GO:0046872 metal ion binding; GO:0008270 zinc ion binding; GO:0046914 transition metal ion binding; GO:0005488 binding; GO:0043167 ion binding;				IPR001781;	Zinc finger, LIM-type;
A0A1S4DMY9	141	K	60S ribosomal protein L19-2	chloroplast	GO:0006518 peptide metabolic process; GO:0043043 peptide biosynthetic process; GO:0044267 cellular protein metabolic process; GO:0006807 nitrogen compound metabolic process; GO:0009058 biosynthetic process; GO:0043603 cellular amide metabolic process; GO:0044238 primary metabolic process; GO:1901566 organonitrogen compound biosynthetic process; GO:1901576 organic substance biosynthetic process; G…	GO:0005840 ribosome; GO:0043229 intracellular organelle; GO:0043232 intracellular non-membrane-bounded organelle; GO:0022625 cytosolic large ribosomal subunit; GO:0044446 intracellular organelle part; GO:0005737 cytoplasm; GO:0032991 macromolecular complex; GO:0044424 intracellular part; GO:0005829 cytosol; GO:0005623 cell; GO:0044422 organelle part; GO:0043228 non-membrane-bounded organelle; GO:…	GO:0003735 structural constituent of ribosome; GO:0005198 structural molecule activity;	K02885	RP-L19e, RPL19; large subunit ribosomal protein L19e	nta03010 Ribosome - Nicotiana tabacum (common tobacco);	IPR000196; IPR015974; IPR015972; IPR033935;	Ribosomal protein L19/L19e; Ribosomal protein L19/L19e, domain 3; Ribosomal protein L19/L19e, domain 1; Ribosomal protein L19, eukaryotic;
A0A1S4D7C2	58	K	tobamovirus multiplication protein 1-like	chloroplast							IPR009457;	Domain of unknown function DUF1084;
P27493	41	K	"Chlorophyll a-b binding protein 21, chloroplastic"	chloroplast	GO:0044267 cellular protein metabolic process; GO:0019684 photosynthesis, light reaction; GO:0044238 primary metabolic process; GO:0044237 cellular metabolic process; GO:0071704 organic substance metabolic process; GO:0008152 metabolic process; GO:0006091 generation of precursor metabolites and energy; GO:0018298 protein-chromophore linkage; GO:0044260 cellular macromolecule metabolic process; GO…	GO:0016020 membrane; GO:0009535 chloroplast thylakoid membrane; GO:0044434 chloroplast part; GO:0098796 membrane protein complex; GO:0005737 cytoplasm; GO:0009534 chloroplast thylakoid; GO:0042651 thylakoid membrane; GO:0031224 intrinsic component of membrane; GO:0032991 macromolecular complex; GO:0044424 intracellular part; GO:0005623 cell; GO:0044422 organelle part; GO:0044425 membrane part; GO…	GO:0097159 organic cyclic compound binding; GO:1901363 heterocyclic compound binding; GO:0005488 binding; GO:0043167 ion binding; GO:0043169 cation binding; GO:0046872 metal ion binding; GO:0046906 tetrapyrrole binding; GO:0016168 chlorophyll binding;	K08912	LHCB1; light-harvesting complex II chlorophyll a/b binding protein 1	nta00196 Photosynthesis - antenna proteins - Nicotiana tabacum (common tobacco); nta01100 Metabolic pathways - Nicotiana tabacum (common tobacco);	IPR023329;	Chlorophyll a/b binding protein domain;
A0A1S3XB94	95	K	TOM1-like protein 2	nucleus	GO:0045184 establishment of protein localization; GO:0006810 transport; GO:0046907 intracellular transport; GO:0070727 cellular macromolecule localization; GO:0051649 establishment of localization in cell; GO:0006886 intracellular protein transport; GO:0071702 organic substance transport; GO:0008104 protein localization; GO:0033036 macromolecule localization; GO:0034613 cellular protein localizat…	GO:0005623 cell; GO:0005622 intracellular; GO:0044464 cell part;					IPR002014; IPR004152; IPR008942;	VHS domain; GAT domain; ENTH/VHS;
A0A1S3ZMR1	1065	K	ABC transporter B family member 19	plasma membrane	GO:0006810 transport; GO:0055085 transmembrane transport; GO:0051179 localization; GO:0051234 establishment of localization;	GO:0031224 intrinsic component of membrane; GO:0016020 membrane; GO:0016021 integral component of membrane; GO:0044425 membrane part;	GO:1901265 nucleoside phosphate binding; GO:0015399 primary active transmembrane transporter activity; GO:0016817 hydrolase activity, acting on acid anhydrides; GO:0016787 hydrolase activity; GO:0016887 ATPase activity; GO:0097159 organic cyclic compound binding; GO:1901363 heterocyclic compound binding; GO:0016462 pyrophosphatase activity; GO:0003824 catalytic activity; GO:0032553 ribonucleotide…	K05658	ABCB1, CD243; ATP-binding cassette, subfamily B (MDR/TAP), member 1 [EC:3.6.3.44]	nta02010 ABC transporters - Nicotiana tabacum (common tobacco);	IPR003593; IPR003439; IPR027417; IPR011527;	AAA+ ATPase domain; ABC transporter-like; P-loop containing nucleoside triphosphate hydrolase; ABC transporter type 1, transmembrane domain;
A0A1S3XH13	254	K	Patatin	chloroplast	GO:0044699 single-organism process; GO:0008152 metabolic process; GO:0044238 primary metabolic process; GO:0044710 single-organism metabolic process; GO:0006629 lipid metabolic process; GO:0071704 organic substance metabolic process;						IPR016035; IPR002641;	Acyl transferase/acyl hydrolase/lysophospholipase; Patatin/Phospholipase A2-related;
A0A1S3XB94	319	K	TOM1-like protein 2	nucleus	GO:0045184 establishment of protein localization; GO:0006810 transport; GO:0046907 intracellular transport; GO:0070727 cellular macromolecule localization; GO:0051649 establishment of localization in cell; GO:0006886 intracellular protein transport; GO:0071702 organic substance transport; GO:0008104 protein localization; GO:0033036 macromolecule localization; GO:0034613 cellular protein localizat…	GO:0005623 cell; GO:0005622 intracellular; GO:0044464 cell part;					IPR002014; IPR004152; IPR008942;	VHS domain; GAT domain; ENTH/VHS;
A0A1S4B6T5	594	K	DNA helicase	nucleus	GO:0006260 DNA replication; GO:0006725 cellular aromatic compound metabolic process; GO:0006259 DNA metabolic process; GO:1901360 organic cyclic compound metabolic process; GO:0006807 nitrogen compound metabolic process; GO:0009058 biosynthetic process; GO:0044238 primary metabolic process; GO:1901576 organic substance biosynthetic process; GO:0044237 cellular metabolic process; GO:0044249 cellul…	GO:0043226 organelle; GO:0043231 intracellular membrane-bounded organelle; GO:0043229 intracellular organelle; GO:0005634 nucleus; GO:0044464 cell part; GO:0005622 intracellular; GO:0032991 macromolecular complex; GO:0044424 intracellular part; GO:0042555 MCM complex; GO:0043234 protein complex; GO:0043227 membrane-bounded organelle; GO:0005623 cell;	GO:0003677 DNA binding; GO:0005524 ATP binding; GO:1901265 nucleoside phosphate binding; GO:0004386 helicase activity; GO:0001882 nucleoside binding; GO:0043167 ion binding; GO:0016817 hydrolase activity, acting on acid anhydrides; GO:0016787 hydrolase activity; GO:0000166 nucleotide binding; GO:0017111 nucleoside-triphosphatase activity; GO:1901363 heterocyclic compound binding; GO:0097159 organ…	K02541	MCM3; DNA replication licensing factor MCM3 [EC:3.6.4.12]	nta03030 DNA replication - Nicotiana tabacum (common tobacco);	IPR003593; IPR001208; IPR012340; IPR033762; IPR027417; IPR027925;	AAA+ ATPase domain; MCM domain; Nucleic acid-binding, OB-fold; MCM OB domain; P-loop containing nucleoside triphosphate hydrolase; MCM N-terminal domain;
A0A1S3Z6X4	78	K	ubiquitin receptor RAD23c-like	cytoplasm	GO:0033554 cellular response to stress; GO:0051603 proteolysis involved in cellular protein catabolic process; GO:0044257 cellular protein catabolic process; GO:0006725 cellular aromatic compound metabolic process; GO:0006259 DNA metabolic process; GO:0006289 nucleotide-excision repair; GO:0044267 cellular protein metabolic process; GO:0050896 response to stimulus; GO:0044237 cellular metabolic p…	GO:0043226 organelle; GO:0043231 intracellular membrane-bounded organelle; GO:0043229 intracellular organelle; GO:0005634 nucleus; GO:0044464 cell part; GO:0005622 intracellular; GO:0044424 intracellular part; GO:0043227 membrane-bounded organelle; GO:0005623 cell;	GO:0097159 organic cyclic compound binding; GO:1901363 heterocyclic compound binding; GO:0003677 DNA binding; GO:0003684 damaged DNA binding; GO:0005515 protein binding; GO:0005488 binding; GO:0003676 nucleic acid binding;	K10839	RAD23, HR23; UV excision repair protein RAD23	nta03420 Nucleotide excision repair - Nicotiana tabacum (common tobacco); nta04141 Protein processing in endoplasmic reticulum - Nicotiana tabacum (common tobacco);	IPR006636; IPR015940; IPR029071; IPR000626; IPR015360; IPR009060;	Heat shock chaperonin-binding; Ubiquitin-associated domain; Ubiquitin-related domain; Ubiquitin domain; XPC-binding domain; UBA-like;
A0A1S3YQF5	273	K	renalase-like	chloroplast	GO:0044699 single-organism process; GO:0008152 metabolic process; GO:0055114 oxidation-reduction process; GO:0044710 single-organism metabolic process;		GO:0003824 catalytic activity; GO:0016491 oxidoreductase activity;	K06955	K06955; uncharacterized protein		IPR023753;	FAD/NAD(P)-binding domain;
A0A1S3X0K8	264	K	Bidirectional sugar transporter SWEET	plasma membrane		GO:0031224 intrinsic component of membrane; GO:0016020 membrane; GO:0016021 integral component of membrane; GO:0044425 membrane part;		K15382	SLC50A, SWEET; solute carrier family 50 (sugar transporter)
Q9FSF6	51	K	60S ribosomal protein L11-1-like (Fragment)	cytoplasm	GO:0006518 peptide metabolic process; GO:0043043 peptide biosynthetic process; GO:0044267 cellular protein metabolic process; GO:0006807 nitrogen compound metabolic process; GO:0009058 biosynthetic process; GO:0043603 cellular amide metabolic process; GO:0044238 primary metabolic process; GO:1901566 organonitrogen compound biosynthetic process; GO:1901576 organic substance biosynthetic process; G…	GO:0005840 ribosome; GO:0043226 organelle; GO:0043229 intracellular organelle; GO:0043232 intracellular non-membrane-bounded organelle; GO:0044464 cell part; GO:0005622 intracellular; GO:0005737 cytoplasm; GO:0032991 macromolecular complex; GO:0044424 intracellular part; GO:1990904 ribonucleoprotein complex; GO:0005623 cell; GO:0030529 intracellular ribonucleoprotein complex; GO:0044444 cytoplasm…	GO:0003735 structural constituent of ribosome; GO:0005198 structural molecule activity;	K02868	RP-L11e, RPL11; large subunit ribosomal protein L11e	nta03010 Ribosome - Nicotiana tabacum (common tobacco);	IPR022803; IPR031309; IPR031310;	Ribosomal protein L5 domain; Ribosomal protein L5, C-terminal; Ribosomal protein L5, N-terminal;
A0A1S4BWK5	83	K	NADP-dependent glyceraldehyde-3-phosphate dehydrogenase-like	cytoplasm	GO:0044699 single-organism process; GO:0008152 metabolic process; GO:0055114 oxidation-reduction process; GO:0044710 single-organism metabolic process;		GO:0016620 oxidoreductase activity, acting on the aldehyde or oxo group of donors, NAD or NADP as acceptor; GO:0003824 catalytic activity; GO:0016491 oxidoreductase activity; GO:0016903 oxidoreductase activity, acting on the aldehyde or oxo group of donors;	K00131	gapN; glyceraldehyde-3-phosphate dehydrogenase (NADP+) [EC:1.2.1.9]	nta00010 Glycolysis / Gluconeogenesis - Nicotiana tabacum (common tobacco); nta00030 Pentose phosphate pathway - Nicotiana tabacum (common tobacco); nta01100 Metabolic pathways - Nicotiana tabacum (common tobacco); nta01200 Carbon metabolism - Nicotiana tabacum (common tobacco);	IPR016161; IPR015590; IPR016162; IPR016163;	Aldehyde/histidinol dehydrogenase; Aldehyde dehydrogenase domain; Aldehyde dehydrogenase N-terminal domain; Aldehyde dehydrogenase, C-terminal;
A0A1S4BWK5	25	K	NADP-dependent glyceraldehyde-3-phosphate dehydrogenase-like	cytoplasm	GO:0044699 single-organism process; GO:0008152 metabolic process; GO:0055114 oxidation-reduction process; GO:0044710 single-organism metabolic process;		GO:0016620 oxidoreductase activity, acting on the aldehyde or oxo group of donors, NAD or NADP as acceptor; GO:0003824 catalytic activity; GO:0016491 oxidoreductase activity; GO:0016903 oxidoreductase activity, acting on the aldehyde or oxo group of donors;	K00131	gapN; glyceraldehyde-3-phosphate dehydrogenase (NADP+) [EC:1.2.1.9]	nta00010 Glycolysis / Gluconeogenesis - Nicotiana tabacum (common tobacco); nta00030 Pentose phosphate pathway - Nicotiana tabacum (common tobacco); nta01100 Metabolic pathways - Nicotiana tabacum (common tobacco); nta01200 Carbon metabolism - Nicotiana tabacum (common tobacco);	IPR016161; IPR015590; IPR016162; IPR016163;	Aldehyde/histidinol dehydrogenase; Aldehyde dehydrogenase domain; Aldehyde dehydrogenase N-terminal domain; Aldehyde dehydrogenase, C-terminal;
A0A1S4CYN9	42	K	"translocase of chloroplast 120, chloroplastic-like"	nucleus			GO:1901265 nucleoside phosphate binding; GO:0001882 nucleoside binding; GO:0043167 ion binding; GO:0016817 hydrolase activity, acting on acid anhydrides; GO:0016787 hydrolase activity; GO:0000166 nucleotide binding; GO:0097159 organic cyclic compound binding; GO:1901363 heterocyclic compound binding; GO:0032549 ribonucleoside binding; GO:0097367 carbohydrate derivative binding; GO:0003824 catalyt…				IPR006703; IPR024283; IPR027417;	AIG1-type guanine nucleotide-binding (G) domain; Translocase of chloroplast 159/132, membrane anchor domain; P-loop containing nucleoside triphosphate hydrolase;
A0A075F2H4	94	K	Ubiquitin-conjugating enzyme E2 36-like protein	mitochondria			GO:0005524 ATP binding; GO:1901265 nucleoside phosphate binding; GO:0001882 nucleoside binding; GO:0043167 ion binding; GO:0000166 nucleotide binding; GO:0097159 organic cyclic compound binding; GO:1901363 heterocyclic compound binding; GO:0032549 ribonucleoside binding; GO:0097367 carbohydrate derivative binding; GO:0032553 ribonucleotide binding; GO:0005488 binding; GO:0032550 purine ribonucleo…	K10580	UBE2N, BLU, UBC13; ubiquitin-conjugating enzyme E2 N [EC:2.3.2.23]	nta04120 Ubiquitin mediated proteolysis - Nicotiana tabacum (common tobacco);	IPR016135; IPR000608;	Ubiquitin-conjugating enzyme/RWD-like; Ubiquitin-conjugating enzyme E2;
A0A1S4ADX9	208	K	uncharacterized protein LOC107796604	chloroplast
A0A1S3XU57	131	K	Carbonic anhydrase	chloroplast	GO:0015976 carbon utilization; GO:0044699 single-organism process;		GO:0046914 transition metal ion binding; GO:0003824 catalytic activity; GO:0005488 binding; GO:0043167 ion binding; GO:0016829 lyase activity; GO:0046872 metal ion binding; GO:0043169 cation binding; GO:0016836 hydro-lyase activity; GO:0008270 zinc ion binding; GO:0004089 carbonate dehydratase activity; GO:0016835 carbon-oxygen lyase activity;	K01673	cynT, can; carbonic anhydrase [EC:4.2.1.1]	nta00910 Nitrogen metabolism - Nicotiana tabacum (common tobacco);
A0A1S3XH22	83	K	probable peroxygenase 4 isoform X2	chloroplast				K17991	PXG; peroxygenase [EC:1.11.2.3]	nta00073 Cutin, suberine and wax biosynthesis - Nicotiana tabacum (common tobacco);
P68173	282	K	Adenosylhomocysteinase	cytoplasm	GO:1901606 alpha-amino acid catabolic process; GO:0009116 nucleoside metabolic process; GO:0042278 purine nucleoside metabolic process; GO:0046498 S-adenosylhomocysteine metabolic process; GO:0006725 cellular aromatic compound metabolic process; GO:0044699 single-organism process; GO:0072523 purine-containing compound catabolic process; GO:0044237 cellular metabolic process; GO:0071704 organic su…		GO:0097159 organic cyclic compound binding; GO:1901363 heterocyclic compound binding; GO:0004013 adenosylhomocysteinase activity; GO:0016801 hydrolase activity, acting on ether bonds; GO:1901265 nucleoside phosphate binding; GO:0051287 NAD binding; GO:0003824 catalytic activity; GO:0005488 binding; GO:0016787 hydrolase activity; GO:0000166 nucleotide binding; GO:0048037 cofactor binding; GO:00168…	K01251	E3.3.1.1, ahcY; adenosylhomocysteinase [EC:3.3.1.1]	nta00270 Cysteine and methionine metabolism - Nicotiana tabacum (common tobacco); nta01100 Metabolic pathways - Nicotiana tabacum (common tobacco);	IPR016040; IPR015878;	NAD(P)-binding domain; S-adenosyl-L-homocysteine hydrolase, NAD binding domain;
D6PZY5	58	K	RNA-binding glycine-rich protein	nucleus			GO:0097159 organic cyclic compound binding; GO:1901363 heterocyclic compound binding; GO:1901265 nucleoside phosphate binding; GO:0005488 binding; GO:0003676 nucleic acid binding; GO:0000166 nucleotide binding; GO:0036094 small molecule binding;				IPR000504; IPR012677;	RNA recognition motif domain; Nucleotide-binding alpha-beta plait domain;
A0A1S4D065	82	K	zinc finger CCCH domain-containing protein 32-like isoform X2	nucleus			GO:0046872 metal ion binding; GO:0043169 cation binding; GO:0005488 binding; GO:0043167 ion binding;				IPR000571;	Zinc finger, CCCH-type;
A0A1S4CY82	145	K	temperature-induced lipocalin-1-like				GO:0005215 transporter activity;				IPR000566; IPR012674; IPR011038;	Lipocalin/cytosolic fatty-acid binding domain; Calycin; Calycin-like;
A0A1S3XU57	109	K	Carbonic anhydrase	chloroplast	GO:0015976 carbon utilization; GO:0044699 single-organism process;		GO:0046914 transition metal ion binding; GO:0003824 catalytic activity; GO:0005488 binding; GO:0043167 ion binding; GO:0016829 lyase activity; GO:0046872 metal ion binding; GO:0043169 cation binding; GO:0016836 hydro-lyase activity; GO:0008270 zinc ion binding; GO:0004089 carbonate dehydratase activity; GO:0016835 carbon-oxygen lyase activity;	K01673	cynT, can; carbonic anhydrase [EC:4.2.1.1]	nta00910 Nitrogen metabolism - Nicotiana tabacum (common tobacco);
A0A1S4AKW3	171	K	"ribulose bisphosphate carboxylase/oxygenase activase 2, chloroplastic-like"	chloroplast			GO:0005524 ATP binding; GO:1901265 nucleoside phosphate binding; GO:0001882 nucleoside binding; GO:0043167 ion binding; GO:0000166 nucleotide binding; GO:0097159 organic cyclic compound binding; GO:1901363 heterocyclic compound binding; GO:0032549 ribonucleoside binding; GO:0097367 carbohydrate derivative binding; GO:0032553 ribonucleotide binding; GO:0005488 binding; GO:0032550 purine ribonucleo…				IPR003959; IPR027417;	ATPase, AAA-type, core; P-loop containing nucleoside triphosphate hydrolase;
A0A140G1S8	222	K	Cytochrome f	mitochondria	GO:0044699 single-organism process; GO:0008152 metabolic process; GO:0044237 cellular metabolic process; GO:0009987 cellular process; GO:0055114 oxidation-reduction process; GO:0044710 single-organism metabolic process; GO:0015979 photosynthesis;	GO:0043229 intracellular organelle; GO:0016020 membrane; GO:0031361 integral component of thylakoid membrane; GO:0005737 cytoplasm; GO:0042651 thylakoid membrane; GO:0031224 intrinsic component of membrane; GO:0044424 intracellular part; GO:0005623 cell; GO:0016021 integral component of membrane; GO:0034357 photosynthetic membrane; GO:0043226 organelle; GO:0043231 intracellular membrane-bounded o…	GO:0097159 organic cyclic compound binding; GO:1901363 heterocyclic compound binding; GO:0009055 electron carrier activity; GO:0020037 heme binding; GO:0005506 iron ion binding; GO:0046914 transition metal ion binding; GO:0005488 binding; GO:0043167 ion binding; GO:0043169 cation binding; GO:0046872 metal ion binding; GO:0046906 tetrapyrrole binding;	K02634	petA; apocytochrome f	nta00195 Photosynthesis - Nicotiana tabacum (common tobacco); nta01100 Metabolic pathways - Nicotiana tabacum (common tobacco);	IPR024094; IPR024058; IPR011054;	Cytochrome f large domain; Cytochrome f transmembrane anchor; Rudiment single hybrid motif;
A0A1S3Z112	126	K	PITH domain-containing protein At3g04780-like	nucleus							IPR008979; IPR010400;	Galactose-binding domain-like; PITH domain;
A0A1S3XEF3	401	K	"Alpha-1,4 glucan phosphorylase"	cytoplasm	GO:0008152 metabolic process; GO:0005975 carbohydrate metabolic process; GO:0044238 primary metabolic process; GO:0071704 organic substance metabolic process;		GO:0097159 organic cyclic compound binding; GO:1901363 heterocyclic compound binding; GO:0016758 transferase activity, transferring hexosyl groups; GO:0003824 catalytic activity; GO:0005488 binding; GO:0004645 phosphorylase activity; GO:0043167 ion binding; GO:0016757 transferase activity, transferring glycosyl groups; GO:0043168 anion binding; GO:0016740 transferase activity; GO:0048037 cofactor…	K00688	PYG, glgP; glycogen phosphorylase [EC:2.4.1.1]	nta00500 Starch and sucrose metabolism - Nicotiana tabacum (common tobacco); nta01100 Metabolic pathways - Nicotiana tabacum (common tobacco); nta01110 Biosynthesis of secondary metabolites - Nicotiana tabacum (common tobacco);
A0A1S4ARM1	240	K	actin-101-like	cytoskeleton				K10355	ACTF; actin, other eukaryote
A0A1S4DNR5	39	K	"keratin, type I cytoskeletal 9-like"	nucleus	GO:0006810 transport; GO:0051179 localization; GO:0006812 cation transport; GO:0030001 metal ion transport; GO:0006811 ion transport; GO:0051234 establishment of localization;		GO:0046872 metal ion binding; GO:0043169 cation binding; GO:0005488 binding; GO:0043167 ion binding;				IPR006121;	Heavy metal-associated domain, HMA;
A0A1S4CDB0	174	K	TOM1-like protein 2	cytoplasm	GO:0045184 establishment of protein localization; GO:0006810 transport; GO:0046907 intracellular transport; GO:0070727 cellular macromolecule localization; GO:0051649 establishment of localization in cell; GO:0006886 intracellular protein transport; GO:0071702 organic substance transport; GO:0008104 protein localization; GO:0033036 macromolecule localization; GO:0034613 cellular protein localizat…	GO:0005623 cell; GO:0005622 intracellular; GO:0044464 cell part;					IPR002014; IPR004152; IPR008942;	VHS domain; GAT domain; ENTH/VHS;
A0A1S4BS12	33	K	MLP-like protein 423	chloroplast	GO:0006952 defense response; GO:0050896 response to stimulus; GO:0006950 response to stress; GO:0009607 response to biotic stimulus;						IPR023393; IPR000916;	START-like domain; Bet v I/Major latex protein;
A0A1S3Z3P5	17	K	V-type proton ATPase catalytic subunit A-like	cytoplasm	GO:0009116 nucleoside metabolic process; GO:0042278 purine nucleoside metabolic process; GO:0034220 ion transmembrane transport; GO:0006725 cellular aromatic compound metabolic process; GO:0009167 purine ribonucleoside monophosphate metabolic process; GO:0090662 ATP hydrolysis coupled transmembrane transport; GO:0009259 ribonucleotide metabolic process; GO:0009117 nucleotide metabolic process; GO…	GO:0032991 macromolecular complex; GO:0016020 membrane; GO:0033178 proton-transporting two-sector ATPase complex, catalytic domain; GO:0033176 proton-transporting V-type ATPase complex; GO:0043234 protein complex; GO:0098796 membrane protein complex; GO:0044425 membrane part; GO:0016469 proton-transporting two-sector ATPase complex; GO:0033180 proton-transporting V-type ATPase, V1 domain; GO:0032…	GO:0042625 ATPase coupled ion transmembrane transporter activity; GO:1901265 nucleoside phosphate binding; GO:0015399 primary active transmembrane transporter activity; GO:0022892 substrate-specific transporter activity; GO:0016817 hydrolase activity, acting on acid anhydrides; GO:0044769 ATPase activity, coupled to transmembrane movement of ions, rotational mechanism; GO:0015077 monovalent inorg…	K02145	ATPeV1A; V-type H+-transporting ATPase subunit A [EC:7.1.2.2]	nta00190 Oxidative phosphorylation - Nicotiana tabacum (common tobacco); nta04145 Phagosome - Nicotiana tabacum (common tobacco); nta01100 Metabolic pathways - Nicotiana tabacum (common tobacco);	IPR031686; IPR004100; IPR000194; IPR027417;	ATPsynthase alpha/beta subunit, N-terminal extension; ATPase, F1/V1/A1 complex, alpha/beta subunit, N-terminal domain; ATPase, F1/V1/A1 complex, alpha/beta subunit, nucleotide-binding domain; P-loop containing nucleoside triphosphate hydrolase;
A0A1S3ZLI4	10	K	probable methyltransferase PMT13	chloroplast			GO:0016741 transferase activity, transferring one-carbon groups; GO:0008168 methyltransferase activity; GO:0003824 catalytic activity; GO:0016740 transferase activity;				IPR029063;	S-adenosyl-L-methionine-dependent methyltransferase;
Q93XB9	25	K	Bax inhibitor 1	plasma membrane				K21889
A0A1S4CZY0	92	K	calmodulin-5-like	nucleus			GO:0043169 cation binding; GO:0046872 metal ion binding; GO:0005509 calcium ion binding; GO:0005488 binding; GO:0043167 ion binding;	K02183	CALM; calmodulin	nta04626 Plant-pathogen interaction - Nicotiana tabacum (common tobacco); nta04070 Phosphatidylinositol signaling system - Nicotiana tabacum (common tobacco); nta04016 MAPK signaling pathway - plant - Nicotiana tabacum (common tobacco);	IPR011992; IPR002048;	EF-hand domain pair; EF-hand domain;
A0A1S4DM13	431	K	Signal recognition particle 54 kDa protein	cytoplasm	GO:0046907 intracellular transport; GO:0072599 establishment of protein localization to endoplasmic reticulum; GO:0072594 establishment of protein localization to organelle; GO:0072657 protein localization to membrane; GO:0045047 protein targeting to ER; GO:0071702 organic substance transport; GO:0006613 cotranslational protein targeting to membrane; GO:0015031 protein transport; GO:0051641 cellu…	GO:0044464 cell part; GO:0005622 intracellular; GO:0048500 signal recognition particle; GO:0005737 cytoplasm; GO:0032991 macromolecular complex; GO:0044424 intracellular part; GO:1990904 ribonucleoprotein complex; GO:0030529 intracellular ribonucleoprotein complex; GO:0005623 cell; GO:0044444 cytoplasmic part;	GO:0003723 RNA binding; GO:1901265 nucleoside phosphate binding; GO:0001882 nucleoside binding; GO:0043167 ion binding; GO:0016817 hydrolase activity, acting on acid anhydrides; GO:0016787 hydrolase activity; GO:0000166 nucleotide binding; GO:0017111 nucleoside-triphosphatase activity; GO:0008312 7S RNA binding; GO:0097159 organic cyclic compound binding; GO:1901363 heterocyclic compound binding;…	K03106	SRP54, ffh; signal recognition particle subunit SRP54 [EC:3.6.5.4]	nta03060 Protein export - Nicotiana tabacum (common tobacco);	IPR003593; IPR013822; IPR004125; IPR000897; IPR027417;	AAA+ ATPase domain; Signal recognition particle, SRP54 subunit, helical bundle; Signal recognition particle, SRP54 subunit, M-domain; Signal recognition particle, SRP54 subunit, GTPase domain; P-loop containing nucleoside triphosphate hydrolase;
A0A1S4B7K3	54	K	ubiquitin receptor RAD23c-like isoform X2	cytoplasm	GO:0033554 cellular response to stress; GO:0051603 proteolysis involved in cellular protein catabolic process; GO:0044257 cellular protein catabolic process; GO:0006725 cellular aromatic compound metabolic process; GO:0006259 DNA metabolic process; GO:0006289 nucleotide-excision repair; GO:0044267 cellular protein metabolic process; GO:0050896 response to stimulus; GO:0044237 cellular metabolic p…	GO:0043226 organelle; GO:0043231 intracellular membrane-bounded organelle; GO:0043229 intracellular organelle; GO:0005634 nucleus; GO:0044464 cell part; GO:0005622 intracellular; GO:0044424 intracellular part; GO:0043227 membrane-bounded organelle; GO:0005623 cell;	GO:0097159 organic cyclic compound binding; GO:1901363 heterocyclic compound binding; GO:0003677 DNA binding; GO:0003684 damaged DNA binding; GO:0005515 protein binding; GO:0005488 binding; GO:0003676 nucleic acid binding;	K10839	RAD23, HR23; UV excision repair protein RAD23	nta03420 Nucleotide excision repair - Nicotiana tabacum (common tobacco); nta04141 Protein processing in endoplasmic reticulum - Nicotiana tabacum (common tobacco);	IPR006636; IPR015940; IPR029071; IPR000626; IPR015360; IPR009060;	Heat shock chaperonin-binding; Ubiquitin-associated domain; Ubiquitin-related domain; Ubiquitin domain; XPC-binding domain; UBA-like;
A0A1S4CAZ2	189	K	"GDP-mannose 3,5-epimerase 1-like"	cytoskeleton			GO:0097159 organic cyclic compound binding; GO:1901363 heterocyclic compound binding; GO:1901265 nucleoside phosphate binding; GO:0047918 GDP-mannose 3,5-epimerase activity; GO:0016853 isomerase activity; GO:0051287 NAD binding; GO:0003824 catalytic activity; GO:0016854 racemase and epimerase activity; GO:0016857 racemase and epimerase activity, acting on carbohydrates and derivatives; GO:0005488…	K10046	GME; GDP-D-mannose 3', 5'-epimerase [EC:5.1.3.18 5.1.3.-]	nta00053 Ascorbate and aldarate metabolism - Nicotiana tabacum (common tobacco); nta00520 Amino sugar and nucleotide sugar metabolism - Nicotiana tabacum (common tobacco); nta01100 Metabolic pathways - Nicotiana tabacum (common tobacco); nta01110 Biosynthesis of secondary metabolites - Nicotiana tabacum (common tobacco);	IPR001509; IPR016040; IPR033890;	NAD-dependent epimerase/dehydratase; NAD(P)-binding domain; GDP-mannose 3,5-epimerase;
A0A1S4BRZ8	71	K	26S proteasome non-ATPase regulatory subunit 2 homolog A-like	nucleus
A0A1S4BIC7	518	K	probable inactive receptor kinase At1g48480	chloroplast	GO:0016310 phosphorylation; GO:0044267 cellular protein metabolic process; GO:0044238 primary metabolic process; GO:0044237 cellular metabolic process; GO:0006796 phosphate-containing compound metabolic process; GO:0071704 organic substance metabolic process; GO:0008152 metabolic process; GO:0006468 protein phosphorylation; GO:0006793 phosphorus metabolic process; GO:0044260 cellular macromolecul…		GO:0005524 ATP binding; GO:1901265 nucleoside phosphate binding; GO:0016773 phosphotransferase activity, alcohol group as acceptor; GO:0001882 nucleoside binding; GO:0043167 ion binding; GO:0005515 protein binding; GO:0004672 protein kinase activity; GO:0000166 nucleotide binding; GO:0097159 organic cyclic compound binding; GO:1901363 heterocyclic compound binding; GO:0032549 ribonucleoside bindi…				IPR000719; IPR013210; IPR032675; IPR011009;	Protein kinase domain; Leucine-rich repeat-containing N-terminal, plant-type; Leucine-rich repeat domain, L domain-like; Protein kinase-like domain;
A0A1S4C8V8	9	K	Thioredoxin	nucleus	GO:0050794 regulation of cellular process; GO:0042592 homeostatic process; GO:0065008 regulation of biological quality; GO:0050789 regulation of biological process; GO:0045454 cell redox homeostasis; GO:0044763 single-organism cellular process; GO:0019725 cellular homeostasis; GO:0044699 single-organism process; GO:0009987 cellular process; GO:0065007 biological regulation;			K03671	trxA; thioredoxin 1		IPR013766; IPR012336;	Thioredoxin domain; Thioredoxin-like fold;
Q40519	71	K	"Photosystem II 10 kDa polypeptide, chloroplastic"	chloroplast	GO:0008152 metabolic process; GO:0044237 cellular metabolic process; GO:0009987 cellular process; GO:0015979 photosynthesis;	GO:0016020 membrane; GO:0009535 chloroplast thylakoid membrane; GO:0044434 chloroplast part; GO:0098796 membrane protein complex; GO:0005737 cytoplasm; GO:0009534 chloroplast thylakoid; GO:0009654 photosystem II oxygen evolving complex; GO:0042651 thylakoid membrane; GO:0032991 macromolecular complex; GO:0044424 intracellular part; GO:0005623 cell; GO:0044422 organelle part; GO:1902494 catalytic …		K03541	psbR; photosystem II 10kDa protein	nta00195 Photosynthesis - Nicotiana tabacum (common tobacco); nta01100 Metabolic pathways - Nicotiana tabacum (common tobacco);
A0A1S3ZYM9	678	K	5-methyltetrahydropteroyltriglutamate-- homocysteine methyltransferase-like	cytoplasm	GO:0000097 sulfur amino acid biosynthetic process; GO:0016053 organic acid biosynthetic process; GO:0009066 aspartate family amino acid metabolic process; GO:0044699 single-organism process; GO:0009058 biosynthetic process; GO:1901566 organonitrogen compound biosynthetic process; GO:0044237 cellular metabolic process; GO:0000096 sulfur amino acid metabolic process; GO:0044272 sulfur compound bios…		GO:0042085 5-methyltetrahydropteroyltri-L-glutamate-dependent methyltransferase activity; GO:0008168 methyltransferase activity; GO:0046914 transition metal ion binding; GO:0003824 catalytic activity; GO:0005488 binding; GO:0008172 S-methyltransferase activity; GO:0043167 ion binding; GO:0016741 transferase activity, transferring one-carbon groups; GO:0046872 metal ion binding; GO:0043169 cation …	K00549	metE; 5-methyltetrahydropteroyltriglutamate--homocysteine methyltransferase [EC:2.1.1.14]	nta00270 Cysteine and methionine metabolism - Nicotiana tabacum (common tobacco); nta00450 Selenocompound metabolism - Nicotiana tabacum (common tobacco); nta01100 Metabolic pathways - Nicotiana tabacum (common tobacco); nta01110 Biosynthesis of secondary metabolites - Nicotiana tabacum (common tobacco); nta01230 Biosynthesis of amino acids - Nicotiana tabacum (common tobacco);	IPR013215; IPR002629;	Cobalamin-independent methionine synthase MetE, N-terminal; Cobalamin-independent methionine synthase MetE, C-terminal/archaeal;
A0A1S4DA65	124	K	ubiquitin-NEDD8-like protein RUB2	cytoplasm			GO:0005515 protein binding; GO:0005488 binding;	K12158	NEDD8; ubiquitin-like protein Nedd8		IPR029071; IPR000626;	Ubiquitin-related domain; Ubiquitin domain;
A0A1S4CK56	62	K	phosphoprotein ECPP44-like	nucleus	GO:0001101 response to acid chemical; GO:0042221 response to chemical; GO:0009415 response to water; GO:0006950 response to stress; GO:0009628 response to abiotic stimulus; GO:1901700 response to oxygen-containing compound; GO:0010035 response to inorganic substance; GO:0050896 response to stimulus;
A0A1S4BPW2	645	K	"trifunctional UDP-glucose 4,6-dehydratase/UDP-4-keto-6-deoxy-D-glucose 3,5-epimerase/UDP-4-keto-L-rhamnose-reductase RHM1-like"	chloroplast	GO:0008152 metabolic process; GO:0006725 cellular aromatic compound metabolic process; GO:0046483 heterocycle metabolic process; GO:0006139 nucleobase-containing compound metabolic process; GO:1901135 carbohydrate derivative metabolic process; GO:1901360 organic cyclic compound metabolic process; GO:0006807 nitrogen compound metabolic process; GO:0034641 cellular nitrogen compound metabolic proce…		GO:0016829 lyase activity; GO:0016836 hydro-lyase activity; GO:0008460 dTDP-glucose 4,6-dehydratase activity; GO:0003824 catalytic activity; GO:0016835 carbon-oxygen lyase activity;	K12450	RHM; UDP-glucose 4,6-dehydratase [EC:4.2.1.76]	nta00520 Amino sugar and nucleotide sugar metabolism - Nicotiana tabacum (common tobacco);	IPR029903; IPR016040;	RmlD-like substrate binding domain; NAD(P)-binding domain;
A0A1S3Z673	150	K	"protein DCL, chloroplastic-like"	nucleus
A0A1S3X5I0	79	K	Carbonic anhydrase	cytoplasm	GO:0015976 carbon utilization; GO:0044699 single-organism process;		GO:0046914 transition metal ion binding; GO:0003824 catalytic activity; GO:0005488 binding; GO:0043167 ion binding; GO:0016829 lyase activity; GO:0046872 metal ion binding; GO:0043169 cation binding; GO:0016836 hydro-lyase activity; GO:0008270 zinc ion binding; GO:0004089 carbonate dehydratase activity; GO:0016835 carbon-oxygen lyase activity;	K01673	cynT, can; carbonic anhydrase [EC:4.2.1.1]	nta00910 Nitrogen metabolism - Nicotiana tabacum (common tobacco);
A0A1S4DA65	87	K	ubiquitin-NEDD8-like protein RUB2	cytoplasm			GO:0005515 protein binding; GO:0005488 binding;	K12158	NEDD8; ubiquitin-like protein Nedd8		IPR029071; IPR000626;	Ubiquitin-related domain; Ubiquitin domain;
A0A1S3Z8Y2	474	K	heat shock 70 kDa protein 15-like	cytoplasm				K09489	HSPA4; heat shock 70kDa protein 4		IPR029048; IPR029047;	Heat shock protein 70kD, C-terminal domain; Heat shock protein 70kD, peptide-binding domain;
A0A1S4C2N5	311	K	"alpha-1,4-glucan-protein synthase [UDP-forming] 1"	cytoplasm	GO:0016051 carbohydrate biosynthetic process; GO:0044711 single-organism biosynthetic process; GO:0006073 cellular glucan metabolic process; GO:0000271 polysaccharide biosynthetic process; GO:0030243 cellulose metabolic process; GO:0044042 glucan metabolic process; GO:0044763 single-organism cellular process; GO:0044699 single-organism process; GO:0033692 cellular polysaccharide biosynthetic proc…		GO:0016853 isomerase activity; GO:0016866 intramolecular transferase activity; GO:0003824 catalytic activity;	K13379	RGP, UTM; reversibly glycosylated polypeptide / UDP-arabinopyranose mutase [EC:2.4.1.- 5.4.99.30]	nta00520 Amino sugar and nucleotide sugar metabolism - Nicotiana tabacum (common tobacco);	IPR029044;	Nucleotide-diphospho-sugar transferases;
A0A1S4CVR0	248	K	tobamovirus multiplication protein 2A-like	vacuolar membrane		GO:0031224 intrinsic component of membrane; GO:0016020 membrane; GO:0016021 integral component of membrane; GO:0044425 membrane part;
A0A1S4AVA2	38	K	copper transport protein ATX1-like isoform X2	chloroplast	GO:0006810 transport; GO:0051179 localization; GO:0006812 cation transport; GO:0030001 metal ion transport; GO:0006811 ion transport; GO:0051234 establishment of localization;		GO:0046872 metal ion binding; GO:0043169 cation binding; GO:0005488 binding; GO:0043167 ion binding;	K07213	ATOX1, ATX1, copZ, golB; copper chaperone		IPR006121;	Heavy metal-associated domain, HMA;
A0A1S4DBQ6	220	K	Glyceraldehyde-3-phosphate dehydrogenase	cytoplasm	GO:0006006 glucose metabolic process; GO:0044723 single-organism carbohydrate metabolic process; GO:0008152 metabolic process; GO:0055114 oxidation-reduction process; GO:0044710 single-organism metabolic process; GO:0044281 small molecule metabolic process; GO:0005996 monosaccharide metabolic process; GO:0044699 single-organism process; GO:0044238 primary metabolic process; GO:0005975 carbohydrat…		GO:0097159 organic cyclic compound binding; GO:1901363 heterocyclic compound binding; GO:0016620 oxidoreductase activity, acting on the aldehyde or oxo group of donors, NAD or NADP as acceptor; GO:1901265 nucleoside phosphate binding; GO:0051287 NAD binding; GO:0003824 catalytic activity; GO:0005488 binding; GO:0016903 oxidoreductase activity, acting on the aldehyde or oxo group of donors; GO:005…	K00134	GAPDH, gapA; glyceraldehyde 3-phosphate dehydrogenase [EC:1.2.1.12]	nta00010 Glycolysis / Gluconeogenesis - Nicotiana tabacum (common tobacco); nta00710 Carbon fixation in photosynthetic organisms - Nicotiana tabacum (common tobacco); nta01100 Metabolic pathways - Nicotiana tabacum (common tobacco); nta01110 Biosynthesis of secondary metabolites - Nicotiana tabacum (common tobacco); nta01200 Carbon metabolism - Nicotiana tabacum (common tobacco); nta01230 Biosynt…	IPR020829; IPR016040; IPR020828;	Glyceraldehyde 3-phosphate dehydrogenase, catalytic domain; NAD(P)-binding domain; Glyceraldehyde 3-phosphate dehydrogenase, NAD(P) binding domain;
A0A1S4BFP2	66	K	cytochrome b5-like	cytoplasm			GO:0097159 organic cyclic compound binding; GO:1901363 heterocyclic compound binding; GO:0020037 heme binding; GO:0046906 tetrapyrrole binding; GO:0005488 binding;				IPR001199;	Cytochrome b5-like heme/steroid binding domain;
A0A1S4AA99	15	K	T-complex protein 1 subunit beta-like	cytoplasm	GO:0006457 protein folding; GO:0009987 cellular process;		GO:0005524 ATP binding; GO:1901265 nucleoside phosphate binding; GO:0001882 nucleoside binding; GO:0043167 ion binding; GO:0005515 protein binding; GO:0000166 nucleotide binding; GO:0097159 organic cyclic compound binding; GO:1901363 heterocyclic compound binding; GO:0032549 ribonucleoside binding; GO:0097367 carbohydrate derivative binding; GO:0032553 ribonucleotide binding; GO:0005488 binding; …	K09494	CCT2; T-complex protein 1 subunit beta		IPR027410; IPR027409; IPR027413;	TCP-1-like chaperonin intermediate domain; GroEL-like apical domain; GroEL-like equatorial domain;
A0A1S4DJU1	66	K	Proteasome subunit beta	cytoplasm,nucleus	GO:0051603 proteolysis involved in cellular protein catabolic process; GO:0044265 cellular macromolecule catabolic process; GO:0044257 cellular protein catabolic process; GO:0044267 cellular protein metabolic process; GO:0044238 primary metabolic process; GO:0044237 cellular metabolic process; GO:0071704 organic substance metabolic process; GO:1901575 organic substance catabolic process; GO:00081…	GO:1902494 catalytic complex; GO:0000502 proteasome complex; GO:0044464 cell part; GO:0005622 intracellular; GO:0005839 proteasome core complex; GO:0032991 macromolecular complex; GO:0044424 intracellular part; GO:1905368 peptidase complex; GO:0005623 cell; GO:0043234 protein complex; GO:1905369 endopeptidase complex;	GO:0004175 endopeptidase activity; GO:0004298 threonine-type endopeptidase activity; GO:0008233 peptidase activity; GO:0070003 threonine-type peptidase activity; GO:0003824 catalytic activity; GO:0070011 peptidase activity, acting on L-amino acid peptides; GO:0016787 hydrolase activity;	K02736	PSMB4; 20S proteasome subunit beta 7 [EC:3.4.25.1]	nta03050 Proteasome - Nicotiana tabacum (common tobacco);	IPR029055;	Nucleophile aminohydrolases, N-terminal;
[truncated: 865 more rows]

## Sheet: Table S3
Table S3. Motif retrieved from lysine-ubiquitinated peptides.
Protein accession	Position	Amino acid	Motif logo		Motif Logo	Motif	Motif Score	Foreground		Background		Fold Increase
[truncated: 143 more rows]

## Sheet: Table S4
Table S4. Frequency of the different types of amino acids around the ubiquitinated lysines.
[truncated: 21 more rows]

[truncated: 6 more sheets: Table S5, Table S6, Table S7, Table S8, Table S9, Table S10]
